# Supplementary material for: The effects of a set amount of regular maternal exercise during pregnancy on gut microbiota are diet-dependent in mice and do not cause significant diversity changes
Source: PeerJ. 2022 Dec 2;10:e14459. doi: 10.7717/peerj.14459 (PMC9744166; doi:10.7717/peerj.14459)
Supplement: Supplemental Information 2 [file peerj-10-14459-s002.xls]

## Sheet: otu_table.relative
#OTU_num	LFD1	LFD2	LFD3	LFD4	LFD5	LFDex1	LFDex2	LFDex3	LFDex4	LFDex5	LFDex6	HFD1	HFD2	HFD3	HFD4	HFDex1	HFDex2	HFDex3	HFDex4	HFDex5	Taxonomy
OTU_1	0.0470247	0.123554	0.245124	0.0969503	0.365396	0.0422154	0.0761861	0.0668346	0.0782473	0.0393145	0.115615	0.00419863	0.0337036	0.0686286	0.0898126	0.0572923	0.0280163	0.0102294	0.144853	0.00732852	k__Bacteria;p__Firmicutes;c__Bacilli;o__Lactobacillales;f__Lactobacillaceae;g__Lactobacillus;s__Lactobacillus_murinus
OTU_2	0.180121	0.234971	0.0135501	0.00404596	0.184587	0.00312989	0.22394	0.234436	0.00633612	0.0143135	0.0140082	0.00259552	0.00408413	0.27856	0.228062	0.0430551	0.00343525	0.0132829	0.0389328	0.00206115	k__Bacteria;p__Firmicutes;c__Bacilli;o__Lactobacillales;f__Lactobacillaceae;g__Lactobacillus
OTU_3	0.029734	0.0196572	0.00206115	0.0013741	0.0282072	0.00133593	0.0853468	0.0639337	0.00377877	0.00328257	0.0032444	0.000954235	0.00171762	0.100195	0.170503	0.0585519	0.00244284	0.0135883	0.0242757	0.000496202	k__Bacteria;p__Firmicutes;c__Bacilli;o__Lactobacillales;f__Lactobacillaceae;g__Lactobacillus;s__Lactobacillus_reuteri
OTU_4	0.0430932	0.0247338	0.0489332	0.000801557	0.00133593	0.0180541	0.0255353	0.025459	0.00652697	0.113936	0.0512615	0.558838	0.103821	0.0135883	0.0390091	0.00889347	0.0799649	0.385969	0.011031	0.243673	k__Bacteria;p__Firmicutes;c__Bacilli;o__Erysipelotrichales;f__Erysipelotrichaceae;g__Faecalibaculum;s__Faecalibaculum_rodentium
OTU_5	0.169396	0.0146189	0.0191229	0.00198481	0.00194664	0.0124432	0.0340853	0.309668	0.483492	0.67743	0.650865	0.15409	0.0303447	0.0200771	0.0305355	0.00744303	0.0255353	0.223024	0.0534753	0.248635	k__Bacteria;p__Actinobacteriota;c__Actinobacteria;o__Bifidobacteriales;f__Bifidobacteriaceae;g__Bifidobacterium;s__Bifidobacterium_pseudolongum
OTU_6	0.000305355	0.000305355	0.000267186	0.00893164	0.00297721	0.000190847	0.000305355	0.176877	0.328142	0.0142372	0.0919882	0.00404596	0.000381694	0.000305355	0.000229016	0.000877896	0.00064888	0.00454216	0.00259552	0.0018703	k__Bacteria;p__Firmicutes;c__Clostridia;o__Clostridiales;f__Clostridiaceae;g__Candidatus_Arthromitus;s__Candidatus_Arthromitus_sp_SFB-mouse-NL
OTU_7	0.023665	0.0446964	0.0395053	0.0042368	0.00904615	0.0559945	0.0357647	0.00061071	0.000954235	0.00061071	0.000305355	0.048437	0.0292378	0.0534753	0.0306119	0.23894	0.0415665	0.00164128	0.209054	0.00332074	k__Bacteria;p__Bacteroidota;c__Bacteroidia;o__Bacteroidales;f__Muribaculaceae;g__;s__
OTU_8	0.00862628	0.0241994	0	0	0.000458033	3.81694e-05	0.0143517	0.00687049	0.00198481	0.00129776	0.00103057	0	3.81694e-05	0.0165655	0.0174434	0.00904615	0	7.63388e-05	0.00671781	0	k__Bacteria;p__Firmicutes;c__Bacilli;o__Lactobacillales;f__Lactobacillaceae;g__Lactobacillus
OTU_9	0.000381694	0.00377877	0.000572541	0.000305355	0.000114508	0.000916065	0.0223291	0.000763388	0.000267186	0.000496202	0.0130158	0.000381694	0.000725219	0.0197336	0.0450781	0.000190847	0.00064888	0.184167	3.81694e-05	0.000381694	k__Bacteria;p__Firmicutes;c__Bacilli;o__Erysipelotrichales;f__Erysipelotrichaceae;g__Dubosiella;s__
OTU_10	0.00282454	0.000496202	0.011031	0.000801557	0.00267186	0.02523	0.0042368	0	0	0	0	0.000190847	0.00671781	0.00538188	0.00202298	0.00942784	0.0175198	7.63388e-05	0.00458033	0.00064888	k__Bacteria;p__Bacteroidota;c__Bacteroidia;o__Bacteroidales;f__Prevotellaceae;g__Alloprevotella;s__
OTU_11	0.00671781	0.00129776	0.00740486	0.0157258	0.000343525	0.016451	0.0171381	7.63388e-05	0	0	0	0.000381694	0.00660331	0.00477117	0.00690866	0.0207642	0.0409939	0.0023665	0.00813008	0.00171762	k__Bacteria;p__unidentified_Bacteria;c__Desulfovibrionia;o__Desulfovibrionales;f__Desulfovibrionaceae;g__;s__
OTU_12	0.000496202	0.00114508	0.0475209	0.057674	0.0235887	0.00774839	0.00435131	0.00141227	0.000419863	0.00145044	0.000534372	0.00580175	0.115272	0.00240467	0.00301538	0.000305355	0.00419863	0.000343525	0.000190847	0.249284	k__Bacteria;p__Desulfobacterota;c__Desulfovibrionia;o__Desulfovibrionales;f__Desulfovibrionaceae;g__Desulfovibrio;s__
OTU_13	0.0123287	0.0295049	0.0185885	0.00343525	0.0330165	0.0603076	0.0133593	0.0056109	0.0037406	0.00919882	0.00061071	0.0187412	0.0165273	0.0120997	0.00706134	0.0355357	0.0171762	0.000190847	0.0435513	0.000916065	k__Bacteria;p__Bacteroidota;c__Bacteroidia;o__Bacteroidales;f__Muribaculaceae;g__;s__
OTU_14	0.00790106	0.00339708	0	0	0	0	0.00244284	0.00133593	0.0117562	0.000916065	0.00942784	3.81694e-05	0	0.00759571	0.00114508	0.00877896	0	7.63388e-05	0.000877896	0	k__Bacteria;p__Firmicutes;c__Bacilli;o__Erysipelotrichales;f__Erysipelotrichaceae;g__Turicibacter;s__
OTU_15	0.00129776	0.000992404	0.00335891	0.00114508	0.00141227	0.0156876	0.00320623	0	3.81694e-05	0	0	7.63388e-05	0.00721402	0.00862628	0.00171762	0.0150769	0.0229016	0.000916065	0.00782473	0.000152678	k__Bacteria;p__Bacteroidota;c__Bacteroidia;o__Bacteroidales;f__Bacteroidaceae;g__Bacteroides;s__Bacteroides_acidifaciens
OTU_16	0.00377877	0.00377877	0.0116798	0.0100386	0.00641246	0.0127867	0.0120997	0.00061071	0.000419863	0.000572541	0.000458033	0	0.00603076	0.00583992	0.00526738	0.00450399	0.00942784	0	0.0042368	0.000458033	k__Bacteria;p__Bacteroidota;c__Bacteroidia;o__Bacteroidales;f__Muribaculaceae;g__;s__
OTU_17	0.000534372	0.000496202	7.63388e-05	0.000725219	0.000152678	0.000190847	0.000305355	0	3.81694e-05	7.63388e-05	3.81694e-05	0	0.000267186	0.000114508	7.63388e-05	7.63388e-05	0.000534372	0	0.000190847	0	k__Bacteria;p__Firmicutes;c__Clostridia;o__Clostridia_UCG-014;f__;g__;s__
OTU_18	0.00217566	0.000190847	0.00175579	0.00725219	0.000725219	0.00492385	0.00106874	0	0	0	0	0	0.00683232	0.000954235	0.00385511	0.01126	0.0108019	0.000801557	0.00637429	0.000152678	k__Bacteria;p__Bacteroidota;c__Bacteroidia;o__Bacteroidales;f__Bacteroidaceae;g__Bacteroides;s__Bacteroides_sartorii
OTU_19	0.00122142	0.00347342	0.00362609	0.000801557	0.0101912	0.000954235	0.000954235	0.016451	0.00412229	0.0237414	0.000190847	0.00244284	0.00164128	0.00152678	0.000534372	0.00240467	0.00290087	0	0.00396962	3.81694e-05	k__Bacteria;p__Bacteroidota;c__Bacteroidia;o__Bacteroidales;f__Muribaculaceae;g__;s__
OTU_20	0.00290087	0.000496202	0.00458033	0.006985	0.00683232	0.00412229	0.00751937	7.63388e-05	0	0	0	0.00164128	0.0469102	0.00606893	0.00473301	0.0233978	0.0297721	0.0109928	0.00874079	0.00637429	k__Bacteria;p__Desulfobacterota;c__Desulfovibrionia;o__Desulfovibrionales;f__Desulfovibrionaceae;g__Desulfovibrio;s__Desulfovibrio_fairfieldensis
OTU_21	0.00393145	0.0119852	0.00790106	0.0103439	0.00477117	0.0151914	0.00316806	0.000152678	0.00133593	0.000419863	0.000152678	0.00248101	0.00240467	0.0023665	0.00202298	0.0100386	0.00152678	0.000343525	0.0142754	0.000267186	k__Bacteria;p__Bacteroidota;c__Bacteroidia;o__Bacteroidales;f__Muribaculaceae;g__;s__
OTU_22	0.000114508	3.81694e-05	0	0	0	3.81694e-05	0.000534372	0	0	0	0	0	0	0.000687049	3.81694e-05	0.00500019	0	0	0.0138173	0	k__Bacteria;p__Proteobacteria;c__Gammaproteobacteria;o__Xanthomonadales;f__Xanthomonadaceae;g__Stenotrophomonas;s__[Pseudomonas]_geniculata
OTU_23	0.00118325	0.00198481	0.00358792	0.00202298	0.00103057	0.00751937	0.000992404	0	7.63388e-05	0	0	0.000419863	0.0102676	0.00167945	0.00484751	0.0120615	0.0109928	0.00175579	0.0101531	0.000229016	k__Bacteria;p__Bacteroidota;c__Bacteroidia;o__Bacteroidales;f__Tannerellaceae;g__Parabacteroides
OTU_24	0.000992404	0.000458033	0.0206115	0.000687049	0.000763388	0.0195046	0.000763388	0.000458033	0.000229016	3.81694e-05	0.000343525	0.0111836	0.0257643	0.00171762	0.0100004	0.00103057	0.0140082	0.0104966	0.00106874	0.00141227	k__Bacteria;p__Proteobacteria;c__Gammaproteobacteria;o__Enterobacterales;f__Enterobacteriaceae;g__Escherichia-Shigella;s__Escherichia_coli
OTU_25	0.00396962	0.0083591	0.014657	0.0097332	0.0147716	0.0225963	0.00805374	3.81694e-05	0.000229016	3.81694e-05	0	0.00328257	0.00446582	0.0042368	0.00305355	0.0100767	0.0114126	0.000114508	0.00969503	0.000763388	k__Bacteria;p__Bacteroidota;c__Bacteroidia;o__Bacteroidales;f__Muribaculaceae;g__;s__
OTU_26	0.00893164	0	0.000801557	0	0	0.01668	3.81694e-05	0	0	0	0	0.000152678	0.00122142	3.81694e-05	0	3.81694e-05	0.00133593	0	0.0037406	0	k__Bacteria;p__Firmicutes;c__Clostridia;o__Clostridia_UCG-014;f__;g__;s__
OTU_27	0.000763388	7.63388e-05	0.000305355	0	3.81694e-05	0.000992404	0.00759571	0	0	0	0	0	0.000725219	0.0854613	0.00767205	0.00061071	0.000458033	0	0.000725219	0	k__Bacteria;p__Verrucomicrobiota;c__Verrucomicrobiae;o__Verrucomicrobiales;f__Akkermansiaceae;g__Akkermansia;s__Akkermansia_muciniphila
OTU_28	0	0	0	0	0.000190847	0	0	0	3.81694e-05	0	0	0	0	0	0	0	0.000114508	3.81694e-05	0	0.000343525	k__Bacteria;p__Firmicutes;c__Bacilli;o__Lactobacillales;f__Streptococcaceae;g__Streptococcus
OTU_29	0	0	0	0.000114508	3.81694e-05	0.000114508	0	0	0.00156495	3.81694e-05	0.000229016	0.000229016	7.63388e-05	0	7.63388e-05	0	0.000877896	0.000572541	0	0.00103057	k__Bacteria;p__Firmicutes;c__Bacilli;o__Lactobacillales;f__Streptococcaceae;g__Streptococcus
OTU_30	0.00213749	0.000992404	0.000801557	0.000458033	0.000877896	0.00160311	0.00549639	7.63388e-05	0	3.81694e-05	7.63388e-05	0.000114508	0.00347342	0.00179396	0.00316806	0.00404596	0.00152678	7.63388e-05	0.00370243	0.000419863	k__Bacteria;p__Firmicutes;c__Clostridia;o__Oscillospirales;f__[Eubacterium]_coprostanoligenes_group;g__;s__
OTU_31	0.000190847	3.81694e-05	0.000152678	0	0	0.00458033	0	7.63388e-05	7.63388e-05	0	0.000114508	0.000305355	0.00251918	0	0	3.81694e-05	0.00103057	0.000687049	0	0.000305355	k__Bacteria;p__Firmicutes;c__Clostridia;o__Lachnospirales;f__Lachnospiraceae
OTU_32	0.00309172	0	0.00320623	3.81694e-05	0	0.00614527	0.000343525	0	0	0	0	0	0.00480934	0.000229016	0	0.00114508	0.0186648	3.81694e-05	0.000305355	0	k__Bacteria;p__Bacteroidota;c__Bacteroidia;o__Bacteroidales;f__Bacteroidaceae;g__Bacteroides;s__Bacteroides_stercorirosoris
OTU_33	0.000801557	0.000496202	0.000954235	0.00125959	0.000343525	0.00248101	0.0023665	0	0	0	0	0	0.00290087	0.00129776	0.00061071	0.00255735	0.0037406	0.000381694	0.00213749	0.000152678	k__Bacteria;p__Bacteroidota;c__Bacteroidia;o__Bacteroidales;f__Bacteroidaceae;g__Bacteroides;s__Bacteroides_acidifaciens
OTU_34	0.00328257	0.014199	0.00339708	0.000381694	0.000152678	0.0294286	0.000458033	0	0	0	0	7.63388e-05	0.00213749	0.00271003	0.000267186	0.00255735	0.0046185	3.81694e-05	0.00232833	0	k__Bacteria;p__Bacteroidota;c__Bacteroidia;o__Bacteroidales;f__Prevotellaceae;g__Prevotellaceae_UCG-001;s__
OTU_35	0.00450399	0.0100004	0.00282454	0	0	0.00469484	0.00217566	0.000229016	0.000152678	0.000152678	0	0.00225199	0.00305355	0.00339708	0.00255735	0.00847361	0.00480934	3.81694e-05	0.0112981	0	k__Bacteria;p__Bacteroidota;c__Bacteroidia;o__Bacteroidales;f__Muribaculaceae;g__Muribaculum;s__
OTU_36	0.00538188	0.000725219	0.00156495	0.0589717	0.000725219	0.0180541	0.0156495	0	0	0	0	0	0.0013741	0.00759571	0.00503836	0.00232833	0.00194664	3.81694e-05	0.00458033	0.00118325	k__Bacteria;p__Bacteroidota;c__Bacteroidia;o__Bacteroidales;f__Rikenellaceae;g__Alistipes;s__
OTU_37	7.63388e-05	7.63388e-05	0.000152678	0.000458033	7.63388e-05	0.000229016	3.81694e-05	0.00106874	0.000305355	0.000229016	0.000267186	0.000343525	7.63388e-05	7.63388e-05	0.000458033	0	0.000229016	0.000458033	0.000229016	0.000496202	k__Bacteria;p__Firmicutes;c__Bacilli;o__Lactobacillales;f__Streptococcaceae;g__Streptococcus
OTU_38	0.00454216	0.0124814	0.0164128	0.0467193	0.0150769	0.0133593	0.00641246	0.000229016	0.000305355	0.00145044	0.000305355	0.0239704	0.00209932	0.00416046	0.0028627	0.0138173	0.0093515	0.000152678	0.0141608	0.000725219	k__Bacteria;p__Bacteroidota;c__Bacteroidia;o__Bacteroidales;f__Muribaculaceae;g__;s__
OTU_39	0.00290087	0.00400779	0.0118325	0.00519104	0.00645063	0.0130539	0.00996221	0.000725219	0.000839727	0.000916065	0.000190847	0.00259552	0.00198481	0.00343525	0.00225199	0.00282454	0.00400779	0.000114508	0.00293904	0.000114508	k__Bacteria;p__Bacteroidota;c__Bacteroidia;o__Bacteroidales;f__Muribaculaceae;g__;s__
OTU_40	0	3.81694e-05	0.000954235	3.81694e-05	0.00232833	0.00141227	0.000419863	0	0	0	0	0.00229016	0.00118325	0.00213749	0.000534372	0.00183213	0.00114508	3.81694e-05	0.00419863	0.000458033	k__Bacteria;p__Campilobacterota;c__Campylobacteria;o__Campylobacterales;f__Helicobacteraceae;g__Helicobacter
OTU_41	0.00591626	0.00893164	0.000458033	0	7.63388e-05	0.000725219	0.00297721	0.000114508	7.63388e-05	7.63388e-05	7.63388e-05	0	0.000801557	0.00106874	0.0148097	0.00148861	0.000916065	0.00061071	0.00122142	7.63388e-05	k__Bacteria;p__Firmicutes;c__Bacilli;o__Staphylococcales;f__Staphylococcaceae;g__Staphylococcus;s__Staphylococcus_lentus
OTU_42	0.00167945	0.00251918	0.00603076	0.00961869	0.0317569	0.00156495	0.00198481	0.00064888	0.000725219	0.00129776	0.000725219	0.00206115	0.00431314	0.0013741	0.00164128	0.0013741	0.0027482	0.00129776	0.00190847	0.00282454	k__Bacteria;p__Actinobacteriota;c__Coriobacteriia;o__Coriobacteriales;f__Eggerthellaceae;g__Enterorhabdus;s__
OTU_43	0	0.000152678	0	3.81694e-05	3.81694e-05	3.81694e-05	7.63388e-05	0	0.000267186	7.63388e-05	0	0	3.81694e-05	3.81694e-05	0	0	0	0.000152678	7.63388e-05	7.63388e-05	k__Bacteria;p__Firmicutes;c__Bacilli;o__Lactobacillales;f__Enterococcaceae;g__Enterococcus;s__Enterococcus_faecium
OTU_44	0.00354975	0.00416046	0.0143517	0.0210695	0.0124051	0.00755754	0.00438948	0.000229016	0.00064888	7.63388e-05	0	0.00160311	0.00370243	0.00335891	0.00267186	0.00725219	0.0064888	0.000419863	0.0051147	0.000496202	k__Bacteria;p__Bacteroidota;c__Bacteroidia;o__Bacteroidales;f__Muribaculaceae;g__;s__
OTU_45	0.00442765	0.00240467	0.00190847	0.000381694	0.000992404	0.00877896	0.00213749	0	0	0	0	3.81694e-05	0.00492385	0.0013741	0.00118325	0.00805374	0.00507653	3.81694e-05	0.00316806	0	k__Bacteria;p__Bacteroidota;c__Bacteroidia;o__Bacteroidales;f__Muribaculaceae;g__;s__
OTU_46	0.00309172	0.00446582	0.00522921	0.00500019	0.00125959	0.0042368	0.00507653	0.000114508	0.000152678	0.000114508	0	0.000343525	0.000954235	0.00232833	0.00118325	0.00465667	0.00454216	0.000229016	0.0032444	0.000114508	k__Bacteria;p__Bacteroidota;c__Bacteroidia;o__Bacteroidales;f__Muribaculaceae;g__;s__
OTU_47	0.0018703	0.000916065	0	0	0.00145044	7.63388e-05	0.00496202	0	0.000114508	3.81694e-05	0	0.000152678	0.00542005	0.0115272	0.00412229	0.000496202	0.00129776	7.63388e-05	0.000152678	0.000229016	k__Bacteria;p__Firmicutes;c__Clostridia;o__Peptostreptococcales-Tissierellales;f__Peptostreptococcaceae;g__Romboutsia;s__Romboutsia_ilealis
OTU_48	0	0	0	0	3.81694e-05	0	0	0	0	0	0	0	0	0	0	0	0	0	0	0.000534372	k__Bacteria;p__Bacteroidota;c__Bacteroidia;o__Bacteroidales;f__Porphyromonadaceae;g__Porphyromonas;s__
OTU_49	0.0078629	0.0142754	0.00221382	0.00309172	0.00332074	0.0061071	0.00587809	0.00843544	0.00305355	0.00893164	0.00221382	0.006985	0.00106874	0.0042368	0.00496202	0.0176343	0.00778656	3.81694e-05	0.0222909	3.81694e-05	k__Bacteria;p__Bacteroidota;c__Bacteroidia;o__Bacteroidales;f__Muribaculaceae;g__;s__
OTU_50	0	0	7.63388e-05	0	0.000877896	0	0	0	0	0	0	0.000114508	0	0	0	0	3.81694e-05	0	0	0.000725219	k__Bacteria;p__Fusobacteriota;c__Fusobacteriia;o__Fusobacteriales;f__Fusobacteriaceae;g__Fusobacterium;s__Fusobacterium_periodonticum
OTU_51	0.00545822	0.00717585	0.0172907	0.0097332	0.0110691	0.00881713	0.006985	0.00179396	0.000992404	0.00194664	0.000419863	0.00141227	0.0059926	0.00400779	0.00293904	0.00725219	0.0182068	0.000343525	0.0148861	0.00129776	k__Bacteria;p__Bacteroidota;c__Bacteroidia;o__Bacteroidales;f__Muribaculaceae;g__;s__
OTU_52	0.000229016	0.00141227	0.000801557	0.0093515	0.000801557	0.00538188	0.00229016	0	0	0	0	0.000381694	0.00145044	0.00229016	0.00145044	0.00316806	0.00328257	0.000267186	0.0018703	0.000343525	k__Bacteria;p__Bacteroidota;c__Bacteroidia;o__Bacteroidales;f__Rikenellaceae;g__Alistipes;s__
OTU_53	0	0	0.00702317	0	0	7.63388e-05	0	0	0	0	0	0	7.63388e-05	0	0	0.000114508	0	0	0	0	k__Bacteria;p__Proteobacteria;c__Gammaproteobacteria;o__Burkholderiales;f__Burkholderiaceae;g__Ralstonia;s__Ralstonia_pickettii
OTU_54	0.0387038	0.0218711	0	0	0	0	0.00606893	0	0	0	0	0	0	0.00759571	0.00381694	0.0276728	0	0	0.0158785	0	k__Bacteria;p__Bacteroidota;c__Bacteroidia;o__Bacteroidales;f__Muribaculaceae;g__;s__
OTU_55	0	0	7.63388e-05	0	0	0.000152678	0.000229016	0	0	3.81694e-05	0	0	0.000343525	0.000114508	0	0.000725219	7.63388e-05	0	0.000877896	0	k__Bacteria;p__Proteobacteria;c__Gammaproteobacteria;o__Pseudomonadales;f__Pseudomonadaceae;g__Pseudomonas
OTU_56	0.00545822	0.00061071	0.0023665	0.0145044	0.00522921	0.038971	0.0027482	7.63388e-05	3.81694e-05	0	7.63388e-05	0	0.00282454	0.00183213	0.00133593	0.000801557	0.00213749	0	0.000763388	0.00992404	k__Bacteria
OTU_57	0.000343525	0.00202298	0.00320623	0.000229016	0.000305355	0.00328257	0.00408413	0.000152678	7.63388e-05	3.81694e-05	7.63388e-05	0.0118325	0.0372152	0.0104584	0.0242757	0.00587809	0.00847361	0.00660331	0.0262224	0.00431314	k__Bacteria;p__Actinobacteriota;c__Coriobacteriia;o__Coriobacteriales;f__Atopobiaceae
OTU_58	0.000190847	3.81694e-05	0.0322913	0.0248101	0.00183213	0.0168327	0.00316806	0.000305355	0.000114508	7.63388e-05	3.81694e-05	0.00240467	0.0088553	0.000343525	0.00133593	0.00118325	0.0503454	0.000229016	0.0074812	0.00106874	k__Bacteria;p__unidentified_Bacteria;c__Saccharimonadia;o__Saccharimonadales;f__Saccharimonadaceae;g__Candidatus_Saccharimonas;s__
OTU_59	0.00702317	0.00717585	0.000877896	0.000992404	0.00118325	0.00229016	0.00553456	0.00179396	0.000381694	0.000763388	3.81694e-05	0.00122142	0.000496202	0.00271003	0.0018703	0.00583992	0.000801557	0	0.00637429	3.81694e-05	k__Bacteria;p__Bacteroidota;c__Bacteroidia;o__Bacteroidales;f__Muribaculaceae;g__;s__
OTU_60	0.00190847	0.0037406	0.00122142	0.00125959	0.000916065	0.0013741	0.00110691	0	3.81694e-05	3.81694e-05	0.000114508	0.000114508	0.000916065	0.00114508	0.00129776	0.0027482	0.00122142	7.63388e-05	0.0056109	3.81694e-05	k__Bacteria;p__Bacteroidota;c__Bacteroidia;o__Bacteroidales;f__Muribaculaceae;g__;s__
OTU_61	0.00164128	0.000229016	0.00164128	0.00542005	0.000114508	0.00202298	0.00103057	0	0	0	0	3.81694e-05	0.00164128	0.000687049	0.00122142	0.00271003	0.00240467	0.000114508	0.00141227	0.000190847	k__Bacteria;p__Bacteroidota;c__Bacteroidia;o__Bacteroidales;f__Rikenellaceae;g__Alistipes;s__
OTU_62	0.000305355	0.000305355	0.00110691	0.00931333	0.000572541	0.00267186	0.00179396	0	0	0	0	0.000114508	0.00125959	0.00160311	0.00061071	0.00202298	0.00965686	0.000458033	0.0018703	0.000343525	k__Bacteria;p__Bacteroidota;c__Bacteroidia;o__Bacteroidales;f__Rikenellaceae;g__Alistipes;s__
OTU_63	0	0	0	0	0	0	0	0	0	0	0	0	0	0	0	0	3.81694e-05	0	0	0	k__Bacteria;p__Firmicutes;c__Bacilli;o__Lactobacillales;f__Lactobacillaceae;g__Lactobacillus;s__Lactobacillus_fermentum
OTU_64	0.00064888	7.63388e-05	0.0117562	0.000305355	0	0.0037406	0.00465667	0	0	0	0	7.63388e-05	0.000877896	0.00221382	0.000954235	0.000839727	0.00061071	0	0.000229016	3.81694e-05	k__Bacteria;p__Deferribacteres;c__unidentified_Deferribacteres;o__Deferribacterales;f__Deferribacteraceae;g__Mucispirillum;s__Mucispirillum_schaedleri
OTU_65	0.0107638	0.00145044	0.00377877	0.000458033	0.0037406	0.00389328	0.0046185	0.000725219	0.00110691	0.00190847	0.000381694	0	0.000381694	0.00396962	0.00129776	0.00778656	0.000381694	0	0.00500019	0	k__Bacteria;p__Bacteroidota;c__Bacteroidia;o__Bacteroidales;f__Muribaculaceae;g__;s__
OTU_66	0	0	0.0129776	0	0	0.00736669	0	0	0	0	0	0	0.0322531	0	0	0	0.00980953	0.0046185	0	3.81694e-05	k__Bacteria;p__Firmicutes;c__Clostridia;o__Monoglobales;f__Monoglobaceae;g__Monoglobus;s__
OTU_67	0.00690866	0.00328257	0.00164128	0.000229016	0.0027482	0.00366426	0.000877896	0.00328257	0.0061071	0.00427497	0.000992404	7.63388e-05	0.000381694	0.00106874	0.00110691	0.0122142	0.000572541	0.000114508	0.00496202	7.63388e-05	k__Bacteria;p__Bacteroidota;c__Bacteroidia;o__Bacteroidales;f__Muribaculaceae;g__;s__
OTU_68	0.00122142	0.000190847	0.00103057	0.0145044	0.000725219	0.0100386	0.01126	7.63388e-05	0	0	3.81694e-05	0	0.00259552	0.0032444	0.00454216	0.000229016	0.00816825	0	0.000496202	0.000305355	k__Bacteria;p__Firmicutes;c__Clostridia;o__Lachnospirales;f__Lachnospiraceae;g__Lachnospiraceae_NK4A136_group;s__
OTU_69	0.000305355	0.00106874	0.00206115	0.00629795	0.00816825	0.00175579	0.00190847	0.000267186	0.000114508	0.000305355	0.000305355	0.00103057	0.000877896	0.000229016	0.00061071	0.000381694	0.000572541	0.00156495	0.000190847	0.000916065	k__Bacteria;p__Actinobacteriota;c__Coriobacteriia;o__Coriobacteriales;f__Eggerthellaceae;g__Enterorhabdus;s__
OTU_70	0	0	0	0	0.00122142	0	0.000114508	0	0	0	0	0	0	0	0	0	0	0	0	0.00152678	k__Bacteria;p__Bacteroidota;c__Bacteroidia;o__Bacteroidales;f__Prevotellaceae;g__Prevotella;s__Prevotella_melaninogenica
OTU_71	0.000534372	0.000877896	0.00190847	0.0119089	0.00103057	0.00335891	0.00064888	0.000190847	0.00133593	0.000190847	0.000114508	0.000458033	0.000381694	0.000305355	0.000458033	0.000954235	0.00133593	0	0.000877896	3.81694e-05	k__Bacteria;p__Bacteroidota;c__Bacteroidia;o__Bacteroidales;f__Muribaculaceae;g__;s__
OTU_72	0.00267186	0.00164128	0.000725219	0.0397725	0.00152678	0.000305355	0.000763388	0	0	0	0	0.000496202	3.81694e-05	0.000687049	0.000954235	0.00259552	7.63388e-05	7.63388e-05	0.00145044	3.81694e-05	k__Bacteria;p__Bacteroidota;c__Bacteroidia;o__Bacteroidales;f__Marinifilaceae;g__Odoribacter;s__
OTU_73	0.00496202	0.0124432	0.00782473	0.0078629	0.00496202	0.0273293	0.00282454	7.63388e-05	0.000534372	0.00118325	0.000114508	0	0.000916065	0.00103057	0.000916065	0.00206115	0.00202298	0	0.00183213	0.000305355	k__Bacteria;p__Bacteroidota;c__Bacteroidia;o__Bacteroidales;f__Muribaculaceae;g__;s__
OTU_74	0.00217566	0.000839727	0.00148861	0.00354975	0.000152678	0.00114508	0.00141227	0	3.81694e-05	3.81694e-05	0	0	0.00198481	0.00248101	0.00370243	0.000725219	0.00244284	0.000305355	0.00114508	0.00164128	k__Bacteria;p__Firmicutes;c__Clostridia;o__Oscillospirales;f__Ruminococcaceae;g__Anaerotruncus;s__
OTU_75	0.00419863	0.00583992	0.00400779	0.0078629	0.0027482	0.0149242	0.00221382	7.63388e-05	0.000458033	0.000305355	0	0.000877896	0.00145044	0.000763388	0.000992404	0.00675598	0.00580175	0	0.0051147	0.000152678	k__Bacteria;p__Bacteroidota;c__Bacteroidia;o__Bacteroidales;f__Muribaculaceae;g__;s__
OTU_76	0.000343525	3.81694e-05	0.000305355	0.00183213	0.00133593	0.000725219	0.00167945	0	0	0	0	0.000305355	0.000687049	0.00255735	0.00167945	0.00064888	0.00167945	0.000152678	0.000763388	0.000229016	k__Bacteria;p__Firmicutes;c__Clostridia;o__Peptostreptococcales-Tissierellales;f__Anaerovoracaceae;g__Family_XIII_AD3011_group;s__
OTU_77	0	0	0	3.81694e-05	0	0	0	0	0	0	0	0	0	7.63388e-05	0	0	0	7.63388e-05	0	3.81694e-05	k__Bacteria;p__Firmicutes;c__Bacilli;o__Lactobacillales;f__Lactobacillaceae;g__Lactobacillus
OTU_78	0	3.81694e-05	0	0.00167945	3.81694e-05	0	0.000114508	0	0	0	7.63388e-05	0.00381694	0	7.63388e-05	0.000114508	7.63388e-05	0	0.00103057	0.000114508	0.000458033	k__Bacteria;p__Firmicutes;c__Bacilli;o__Lactobacillales;f__Lactobacillaceae;g__Lactobacillus;s__Lactobacillus_helveticus
OTU_79	0.000190847	0.000229016	0.00103057	0.00244284	3.81694e-05	0.00633612	0.00354975	0	0	0	0	0	0.00450399	0.000305355	0.000419863	0.000534372	0.00347342	0	0.000305355	0	k__Bacteria;p__Bacteroidota;c__Bacteroidia;o__Bacteroidales;f__Tannerellaceae;g__Parabacteroides
OTU_80	0.00202298	0.00251918	0.00251918	0.00339708	0.0013741	0.00271003	0.00366426	0.000114508	0.000114508	0.000343525	0	0.000763388	0.00156495	0.00362609	0.00167945	0.00358792	0.00362609	7.63388e-05	0.00564907	7.63388e-05	k__Bacteria;p__Bacteroidota;c__Bacteroidia;o__Bacteroidales;f__Muribaculaceae;g__;s__
OTU_81	0.00458033	0.00301538	0.00896981	0.0449635	0.00110691	0.00206115	0.00343525	0	0	0	7.63388e-05	0	0.00148861	0.00198481	0.00251918	0.00221382	0.00557273	0.000114508	0.00171762	0.0023665	k__Bacteria;p__Firmicutes;c__Clostridia;o__Lachnospirales;f__Lachnospiraceae;g__[Eubacterium]_xylanophilum_group;s__
OTU_82	0.00305355	7.63388e-05	0.00164128	0.000801557	0.000954235	0.00431314	0.000496202	0	0	0	0	0.000114508	0.0037406	0.000877896	0.000419863	0.000229016	0.00110691	0	0.000114508	0.00103057	k__Bacteria;p__Firmicutes;c__Clostridia;o__Lachnospirales;f__Lachnospiraceae;g__Lachnospiraceae_NK4A136_group;s__
OTU_83	0.000267186	0.000114508	0.000992404	0.000419863	3.81694e-05	0.00179396	0.000114508	0	0	0	0	0	0.00156495	0.000267186	3.81694e-05	0.000419863	0.00362609	0	0.000305355	0	k__Bacteria;p__Bacteroidota;c__Bacteroidia;o__Bacteroidales;f__Tannerellaceae;g__Parabacteroides;s__Parabacteroides_goldsteinii
OTU_84	0	0	0	0	3.81694e-05	7.63388e-05	0	0	0	0	0	0	3.81694e-05	0	0	0	0	0	0	7.63388e-05	k__Bacteria;p__Actinobacteriota;c__Actinobacteria;o__Micrococcales;f__Micrococcaceae;g__Rothia;s__Rothia_mucilaginosa
OTU_85	3.81694e-05	0	0.0241994	0.00919882	0.000343525	0.000877896	0.000267186	0	0	0	0	0.000190847	0.000916065	0.000190847	0.000534372	0.000381694	0.000839727	0.000114508	0.000190847	0.000267186	k__Bacteria;p__Campilobacterota;c__Campylobacteria;o__Campylobacterales;f__Helicobacteraceae;g__Helicobacter
OTU_86	0.00125959	0.0027482	0.0100386	0.000152678	7.63388e-05	0.0103057	0.000992404	0.000229016	0.000229016	0.000190847	0.000152678	0	0.0106493	0.000152678	0.000458033	0.000343525	0.00606893	0	0.000305355	0.000152678	k__Bacteria;p__Proteobacteria;c__Gammaproteobacteria;o__Burkholderiales;f__Sutterellaceae;g__Parasutterella;s__
OTU_87	0.00061071	0.00179396	0.000190847	0.0109164	0.00309172	0.000267186	0.00343525	0	0	0	0	3.81694e-05	3.81694e-05	0.0013741	0.000954235	7.63388e-05	0.000114508	0	0.000114508	0.000343525	k__Bacteria;p__Bacteroidota;c__Bacteroidia;o__Bacteroidales;f__Rikenellaceae
OTU_88	0	0	0	0.000343525	0	0	0.00183213	7.63388e-05	0	0.000496202	7.63388e-05	0	0	0.000839727	0.00061071	0	0	0	7.63388e-05	0	k__Bacteria;p__Bacteroidota;c__Bacteroidia;o__Bacteroidales;f__Muribaculaceae;g__;s__
OTU_89	0.00202298	0.00206115	7.63388e-05	0	0	7.63388e-05	0.00103057	3.81694e-05	0	3.81694e-05	0	0	0	0.000458033	0.000305355	0.0027482	3.81694e-05	0	0.00232833	0	k__Bacteria;p__Bacteroidota;c__Bacteroidia;o__Bacteroidales;f__Muribaculaceae;g__;s__
OTU_90	0	0	0	0	7.63388e-05	0	0	0	0	7.63388e-05	0	0	0	0	0	0	0	0	0	0	k__Bacteria;p__Firmicutes;c__Bacilli;o__Lactobacillales
OTU_91	0.00198481	0.00290087	0.00194664	0.00396962	0.00362609	0.00175579	0.00251918	3.81694e-05	0	7.63388e-05	3.81694e-05	0.00209932	0.00446582	0.00103057	0.00217566	0.000534372	0.0105729	0.00332074	0.000954235	0.0064888	k__Bacteria;p__Firmicutes;c__Clostridia;o__Lachnospirales;f__Lachnospiraceae;g__Lachnospiraceae_UCG-006;s__
OTU_92	0	0	0	0	0	0	0	0	0	0	0	0	0	0	0	0	0	0	0	0	k__Bacteria;p__Firmicutes;c__Bacilli;o__Lactobacillales;f__Leuconostocaceae;g__Oenococcus;s__Oenococcus_oeni
OTU_93	0.000305355	0.000419863	0.00389328	0.00393145	0.000534372	0.00248101	0.00061071	0	0	0.000305355	0	0.000190847	0.000725219	0.000305355	0.000267186	0.00171762	0.000763388	0	0.000992404	0.000114508	k__Bacteria;p__Bacteroidota;c__Bacteroidia;o__Bacteroidales;f__Muribaculaceae;g__;s__
OTU_94	0.00328257	0.00225199	0.0037406	0.00114508	0.00129776	0.000877896	0.00240467	3.81694e-05	0	3.81694e-05	0	0	0.000381694	0.00183213	0.00190847	0.00568724	0.00114508	0	0.00500019	0	k__Bacteria;p__Bacteroidota;c__Bacteroidia;o__Bacteroidales;f__Muribaculaceae;g__;s__
OTU_95	0.000152678	0.000305355	0.000190847	0.00328257	0.0101912	0.000725219	0.000916065	3.81694e-05	0.000114508	0.000381694	0.000114508	0.000877896	0.0037406	0.000305355	0.000190847	0.00064888	0.000419863	0.000534372	0.000343525	0.000916065	k__Bacteria;p__Actinobacteriota;c__Coriobacteriia;o__Coriobacteriales;f__Eggerthellaceae;g__Enterorhabdus;s__
OTU_96	0.013512	0.0291996	0	0	0	0	0.00339708	0	0	0	0	0	0	0.00278637	0.0023665	0.0172144	0	0	0.00874079	0	k__Bacteria;p__Bacteroidota;c__Bacteroidia;o__Bacteroidales;f__Muribaculaceae;g__;s__
OTU_97	0	0	0	0	7.63388e-05	0	0.000114508	0	0	0	0	0	0	0	0	0	0.000343525	0	0	0.000572541	k__Bacteria;p__Proteobacteria;c__Gammaproteobacteria;o__Pasteurellales;f__Pasteurellaceae;g__Haemophilus;s__Haemophilus_parainfluenzae
OTU_98	0.000152678	0	0.0124432	0	0	0.0133211	0.000190847	0	0	0	0	0	0.00645063	3.81694e-05	0	0	0.0098477	0	0	0	k__Bacteria;p__Actinobacteriota;c__Coriobacteriia;o__Coriobacteriales;f__Atopobiaceae;g__Coriobacteriaceae_UCG-002;s__
OTU_99	0.000801557	0.00141227	0.00106874	0.00843544	0.00114508	0.00351158	0.000801557	0	0	0	0	3.81694e-05	0.00202298	0.000496202	0.000267186	0.000992404	0.00221382	0.000152678	0.00125959	0.000114508	k__Bacteria;p__Bacteroidota;c__Bacteroidia;o__Bacteroidales;f__Muribaculaceae;g__;s__
OTU_100	0.000496202	0	0.000419863	0.0051147	0.000114508	0.000267186	0.000343525	0	0	0	0	0.000458033	0.000305355	0.000267186	0.000267186	0.000229016	0.000419863	0	0.000190847	0.000267186	k__Bacteria;p__Firmicutes;c__Clostridia;o__Oscillospirales;f__UCG-010;g__;s__
OTU_101	0.000419863	0.000229016	0.00133593	7.63388e-05	0.00232833	0.000954235	0.000992404	0.000190847	7.63388e-05	0.000267186	0.000114508	0.00061071	0.0018703	0.00061071	0.000343525	0.00061071	0.000687049	0.000916065	0.000305355	0.00141227	k__Bacteria;p__Actinobacteriota;c__Coriobacteriia;o__Coriobacteriales;f__Eggerthellaceae;g__Parvibacter;s__
OTU_102	0.0114508	0.0177869	0.000458033	0	3.81694e-05	0.000381694	0.00232833	7.63388e-05	7.63388e-05	3.81694e-05	0	0	0.00064888	0.000725219	0	0.0032444	0.00064888	0	0.0146189	0	k__Bacteria;p__Bacteroidota;c__Bacteroidia;o__Bacteroidales;f__Muribaculaceae;g__;s__
OTU_103	0	0	0	0	0	0	0	0	0.000114508	0	0	0.00114508	0	0	0	0	0	0.00416046	7.63388e-05	0.000419863	k__Bacteria;p__Firmicutes;c__Clostridia;o__Clostridiales;f__Clostridiaceae;g__Clostridium_sensu_stricto_1;s__Clostridium_perfringens
OTU_104	0.000992404	0.000152678	0.00114508	0.00988587	0.00110691	0.00206115	0.000877896	0	0	0	0	0.000152678	0.00820642	0.00129776	0.000534372	0.00194664	0.00442765	0.000267186	0.000801557	0.00706134	k__Bacteria
OTU_105	0	0	3.81694e-05	0.000343525	0	3.81694e-05	3.81694e-05	0	0	0	0	0	7.63388e-05	0	0	0	0	0	3.81694e-05	7.63388e-05	k__Bacteria
OTU_106	0.0639337	0.0341234	0.00385511	0	0	0.00435131	0.0638192	0.000954235	0.00122142	0.000992404	0.000839727	0	0.00351158	0.0141227	0.0133975	0.0303065	0.00400779	0.000114508	0.000801557	0	k__Bacteria;p__Firmicutes;c__Bacilli;o__Erysipelotrichales;f__Erysipelotrichaceae;g__Dubosiella;s__
OTU_107	0.000877896	0.000305355	0.000916065	0.00133593	3.81694e-05	0.00106874	0.00339708	0	0	0	0	0	0.00118325	0.000877896	0.000725219	0.00225199	0.00064888	0	0.00213749	3.81694e-05	k__Bacteria;p__Firmicutes;c__Clostridia;o__Oscillospirales;f__Oscillospiraceae;g__Intestinimonas;s__
OTU_108	0.00164128	0.000458033	0.00122142	0	7.63388e-05	0.00183213	0.00145044	0	0	0	0	7.63388e-05	0.0156113	0.00122142	0.00175579	0.0032444	0.0023665	7.63388e-05	0.00122142	0.00549639	k__Bacteria;p__Firmicutes;c__Clostridia;o__Lachnospirales;f__Lachnospiraceae;g__Blautia;s__Lachnospiraceae_bacterium_28-4
OTU_109	3.81694e-05	0.000114508	0.00179396	0.00580175	0.00064888	0.00488568	0.000916065	0	0	0	0	0.000229016	0.00064888	0.000458033	0.000496202	0.000114508	0.00129776	3.81694e-05	0.000114508	0.000114508	k__Bacteria;p__Bacteroidota;c__Bacteroidia;o__Bacteroidales;f__Rikenellaceae;g__Rikenella;s__
OTU_110	0	0	0	0	0.000381694	0	0	0	0	0	0	0	0	0	0	0	0	0	0	0.00061071	k__Bacteria;p__Proteobacteria;c__Gammaproteobacteria;o__Burkholderiales;f__Neisseriaceae;g__Neisseria
OTU_111	0.00164128	0.000572541	0.000305355	0.00152678	7.63388e-05	0.00148861	0.00103057	0	0	0	0	0	0.00122142	0.00171762	0.00118325	0.000725219	0.000801557	0.000114508	0.000725219	3.81694e-05	k__Bacteria;p__Firmicutes;c__Clostridia;o__Oscillospirales;f__Oscillospiraceae;g__Oscillibacter;s__
OTU_112	0.000725219	0.00312989	0.000458033	0	0	0.00820642	0.000229016	0	0	3.81694e-05	7.63388e-05	0	0.00404596	0.000190847	0.00106874	0.000190847	0.00416046	0.000305355	0.000267186	0	k__Bacteria;p__Firmicutes;c__Bacilli;o__Staphylococcales;f__Staphylococcaceae;g__Staphylococcus;s__Staphylococcus_xylosus
OTU_113	0.000305355	0.000152678	0.000534372	0.00125959	0.000763388	0.00152678	0	0	0	0	0	0	0.000458033	0.000229016	3.81694e-05	0	0.00114508	0	0.000190847	3.81694e-05	k__Bacteria;p__Bacteroidota;c__Bacteroidia;o__Bacteroidales;f__Rikenellaceae;g__Rikenellaceae_RC9_gut_group;s__
OTU_114	3.81694e-05	0.000190847	3.81694e-05	0	0	0.000114508	0.00156495	0.000572541	7.63388e-05	7.63388e-05	0.000229016	0	3.81694e-05	0	3.81694e-05	0.000725219	0.000114508	7.63388e-05	0.000572541	0	k__Bacteria;p__Firmicutes;c__Bacilli;o__Staphylococcales;f__Staphylococcaceae;g__Jeotgalicoccus;s__
OTU_115	0	0	0	0	0	0	0	0	0	0	0	0	0	0	0	0	0	0	0	0	k__Bacteria;p__Actinobacteriota;c__Actinobacteria;o__Corynebacteriales;f__Corynebacteriaceae;g__Corynebacterium;s__Corynebacterium_mastitidis
OTU_116	0	3.81694e-05	0	0	0	0.000114508	0	0.000305355	0.000152678	0.000190847	0.000190847	3.81694e-05	0	0	0	0	0	0	0	0	k__Bacteria;p__Proteobacteria;c__Alphaproteobacteria;o__Rhizobiales;f__Rhizobiaceae;g__Allorhizobium-Neorhizobium-Pararhizobium-Rhizobium;s__Agrobacterium_radiobacter
OTU_117	0.00148861	0.000114508	0.00125959	0.00118325	0	0.00339708	0.00145044	0	0	0	0	0	0.00232833	0.00110691	0.000687049	0.000305355	0.00194664	0	0.00114508	3.81694e-05	k__Bacteria;p__unidentified_Bacteria;c__Clostridia;o__Oscillospirales;f__Oscillospiraceae;g__;s__
OTU_118	0.000572541	0.000534372	0.00141227	0.00293904	0.00209932	0.00248101	0.00251918	0.000229016	0	0	0	7.63388e-05	0.00667964	0.00118325	0.00167945	0.000534372	0.00354975	0.00225199	0.000992404	0.00114508	k__Bacteria;p__Firmicutes;c__Clostridia;o__Lachnospirales;f__Lachnospiraceae;g__Lachnospiraceae_NK4A136_group;s__
OTU_119	0.00312989	0.00156495	0.00389328	0.00519104	0.000152678	0.00706134	0.00393145	3.81694e-05	0	0	0	3.81694e-05	0.00683232	0.00381694	0.00240467	0.00248101	0.0078629	0.000458033	0.00225199	0.00061071	k__Bacteria;p__Firmicutes;c__Clostridia;o__Oscillospirales;f__Oscillospiraceae;g__Colidextribacter;s__
OTU_120	0	3.81694e-05	0	0	0	3.81694e-05	0	0	0	0	0	3.81694e-05	0.000152678	0.000190847	3.81694e-05	0.000114508	0.000152678	0.000458033	7.63388e-05	0	k__Bacteria
OTU_121	0.00194664	0.00354975	0.00278637	0.00641246	0.00206115	0.00870262	0.00202298	0	3.81694e-05	3.81694e-05	0	0.00148861	0.00240467	0.00106874	0.00114508	0.00328257	0.00908432	0.000229016	0.0042368	7.63388e-05	k__Bacteria;p__Bacteroidota;c__Bacteroidia;o__Bacteroidales;f__Muribaculaceae;g__;s__
OTU_122	0	0	0	0	0.000190847	0	0	0	0.000687049	0	0	7.63388e-05	0	0	0	0	0.000496202	0	0.000152678	0.000343525	k__Bacteria;p__Firmicutes;c__Negativicutes;o__Veillonellales-Selenomonadales;f__Veillonellaceae;g__Veillonella
OTU_123	0	0	0	0	0	0	0	0	0	0	0	0	0	0	0	0	0	0	0	0	k__Bacteria;p__Firmicutes;c__Bacilli;o__Lactobacillales;f__Aerococcaceae;g__Abiotrophia;s__
OTU_124	0.00175579	0.00148861	0.000419863	0	0	0.00061071	0.00171762	0	0	0	0	0	0.000152678	0.000954235	0.000381694	0.0027482	0.000496202	7.63388e-05	0.00240467	0	k__Bacteria;p__Bacteroidota;c__Bacteroidia;o__Bacteroidales;f__Muribaculaceae;g__;s__
OTU_125	0.000419863	0.000229016	0.000916065	0.0104584	0.00061071	0.00106874	0.00125959	0	0	0	0	0	0.000572541	0.000725219	0.000267186	0.000916065	0.000725219	3.81694e-05	0.000572541	0.000381694	k__Bacteria;p__Firmicutes;c__Clostridia;o__Peptostreptococcales-Tissierellales;f__Anaerovoracaceae;g__[Eubacterium]_nodatum_group;s__
OTU_126	0.000190847	0.000305355	0.000114508	0.00061071	3.81694e-05	0.000305355	0.000534372	7.63388e-05	3.81694e-05	7.63388e-05	0	0	0.000114508	0	7.63388e-05	0.000419863	0.000343525	0	0.000190847	0	k__Bacteria;p__Actinobacteriota;c__Coriobacteriia;o__Coriobacteriales;f__Eggerthellaceae;g__Enterorhabdus;s__
OTU_127	0	0	0	0	0	0	0	3.81694e-05	0	0	0	0	0	0	0	0	0	0	0	0	k__Bacteria;p__Firmicutes;c__Bacilli;o__Lactobacillales;f__Streptococcaceae;g__Streptococcus;s__Streptococcus_respiraculi
OTU_128	0.000458033	0	0.00202298	0.00339708	0.00061071	0.000534372	0.000534372	0	0	0	0	0	0.00061071	0.000305355	0.00114508	0.00122142	0.000687049	0	0.000839727	3.81694e-05	k__Bacteria;p__Bacteroidota;c__Bacteroidia;o__Bacteroidales;f__Muribaculaceae;g__;s__
OTU_129	0	0	0	0	0.000152678	0	0	0	0	0	0	0	0	0	0	0	0	0	0	0.000267186	k__Bacteria;p__unidentified_Bacteria;c__Saccharimonadia;o__Saccharimonadales;f__Saccharimonadaceae;g__TM7x;s__
OTU_130	0	0	0	0	0.000152678	0	0	0	0	0	0	0	0	0	0	0	0	0	0	0.000305355	k__Bacteria;p__Firmicutes;c__Clostridia;o__Lachnospirales;f__Lachnospiraceae;g__Lachnoanaerobaculum;s__
OTU_131	0	0	0	0	0.000114508	0	0	0	0	7.63388e-05	0	0	3.81694e-05	0	0	0	3.81694e-05	0	0	0.000114508	k__Bacteria;p__Firmicutes;c__Bacilli;o__Erysipelotrichales;f__Erysipelotrichaceae;g__Turicibacter;s__Turicibacter_sp_H121
OTU_132	0	0	0	0	0	0	0	0	0	0	0	0	0	0	0	0	0	0	0	0.000190847	k__Bacteria;p__Bacteroidota;c__Bacteroidia;o__Bacteroidales;f__Prevotellaceae;g__Prevotella;s__Prevotella_nanceiensis
OTU_133	0.000267186	3.81694e-05	0.000458033	0.00133593	0.000343525	0.000267186	0.00064888	0	0	0	0	0	0.000229016	0.000534372	0.000343525	0.000572541	0.000305355	0	0.00064888	0.000190847	k__Bacteria;p__Bacteroidota;c__Bacteroidia;o__Bacteroidales;f__Rikenellaceae;g__Alistipes;s__Alistipes_sp_cv1
OTU_134	0	0	0	0	0	0	0	0	0	3.81694e-05	0	0	3.81694e-05	3.81694e-05	0	0	0	3.81694e-05	0	0	k__Bacteria;p__Actinobacteriota;c__Actinobacteria;o__Micrococcales;f__Micrococcaceae;g__Rothia
OTU_135	0.000954235	0.000305355	0.000916065	0.000534372	3.81694e-05	0.00229016	0.00145044	0	0	0	0	0	0.000763388	0.00198481	0.00061071	0.000152678	0.000458033	0.000114508	0.000381694	0	k__Bacteria;p__unidentified_Bacteria;c__Clostridia;o__Oscillospirales;f__Oscillospiraceae;g__;s__
OTU_136	0	0	0.000419863	0	0	0.00232833	0	0	0	0	0	0	0.00232833	0	0	0	0.00164128	0	0	0	k__Bacteria;p__Firmicutes;c__Bacilli;o__Erysipelotrichales;f__Erysipelotrichaceae;g__Ileibacterium;s__Ileibacterium_valens
OTU_137	0.00522921	0.000267186	0	0.000458033	0.000114508	7.63388e-05	0.0037406	0.000114508	0.000229016	3.81694e-05	3.81694e-05	3.81694e-05	0.00148861	0.00400779	0.000267186	0.00316806	7.63388e-05	3.81694e-05	0.000687049	0.000114508	k__Bacteria;p__Firmicutes;c__Clostridia;o__Clostridiales;f__Clostridiaceae;g__Clostridium_sensu_stricto_1;s__
OTU_138	0	3.81694e-05	7.63388e-05	7.63388e-05	3.81694e-05	7.63388e-05	7.63388e-05	0	0	0	0	0	0.000114508	7.63388e-05	3.81694e-05	3.81694e-05	0.00064888	0.000916065	0	0.000152678	k__Bacteria;p__Proteobacteria;c__Gammaproteobacteria;o__Enterobacterales;f__Enterobacteriaceae;g__Klebsiella;s__Klebsiella_variicola
OTU_139	0	0	0	0	0	0	0	0	0	0	0	0	0	0	0	0	0	0	0	0.000114508	k__Bacteria;p__Firmicutes;c__Negativicutes;o__Veillonellales-Selenomonadales;f__Veillonellaceae;g__Dialister;s__
OTU_140	0.000687049	0.000763388	7.63388e-05	0	0	0.00190847	0.000572541	0	0	0	0	0	0.0046185	7.63388e-05	0.000763388	0.000152678	0.00167945	0.0027482	0	0	k__Bacteria;p__Firmicutes;c__Clostridia;o__Lachnospirales;f__Lachnospiraceae
OTU_141	0.000381694	0.000114508	0.000992404	0.00480934	0.00320623	0.00171762	0.000534372	0	0	0	0	0	0.00381694	0.000763388	0.000381694	0.000381694	0.00347342	0.000152678	0.000305355	0.00064888	k__Bacteria
OTU_142	0.00671781	0.00958052	0.0315661	0.00694683	0.0097332	0.00866445	0.0100004	0.000419863	0.00141227	0.000496202	0.000152678	0.00583992	0.00251918	0.00568724	0.00477117	0.00500019	0.0037406	0.000152678	0.00438948	0.000458033	k__Bacteria;p__Bacteroidota;c__Bacteroidia;o__Bacteroidales;f__Muribaculaceae;g__;s__
OTU_143	0.000458033	0	0.000725219	0.000305355	0.000114508	0.00064888	0.000229016	0	0	0	0	0	0.000190847	0.000229016	0	0.00064888	0.000381694	0	0.000419863	0	k__Bacteria;p__Bacteroidota;c__Bacteroidia;o__Bacteroidales;f__Muribaculaceae;g__;s__
OTU_144	0.000114508	7.63388e-05	0	0	0	0	0.000725219	0.000419863	7.63388e-05	0	3.81694e-05	0	3.81694e-05	7.63388e-05	0	0.000419863	0	0	0.000419863	0	k__Bacteria;p__Firmicutes;c__Bacilli;o__Lactobacillales;f__Carnobacteriaceae;g__Atopostipes;s__
OTU_145	0	0	0	0	0	0	0	0	0	0	0	0	0	0	0	0	0	0	0	0	k__Bacteria;p__unidentified_Bacteria;c__Bacilli;o__Erysipelotrichales;f__Erysipelotrichaceae;g__;s__
OTU_146	0	0	0	0.00103057	0.000763388	0	0.000229016	0	0	0	0	0	0	7.63388e-05	0	0	0	0	0.000229016	7.63388e-05	k__Bacteria
OTU_147	0.000687049	0	0.000534372	0.000419863	0.000267186	0.00217566	0.00167945	0	0	0	0	0.000114508	0.000992404	0.000572541	0.000763388	0.00110691	0.00320623	0	0.00110691	3.81694e-05	k__Bacteria;p__unidentified_Bacteria;c__Desulfovibrionia;o__Desulfovibrionales;f__Desulfovibrionaceae;g__;s__
OTU_148	0	0	0	0	0.000343525	0	0	0	0	0	0	0	0	0	0	0	3.81694e-05	0	0	0.000305355	k__Bacteria;p__Campilobacterota;c__Campylobacteria;o__Campylobacterales;f__Campylobacteraceae;g__Campylobacter;s__Campylobacter_concisus
OTU_149	0.00183213	0.000114508	0.000229016	0.00114508	0.000114508	0.00133593	0.00221382	0	0	0	0	0	0.000343525	0.00061071	0.000152678	0.000954235	0.000152678	0	0.00118325	0.000152678	k__Bacteria;p__Firmicutes;c__Clostridia;o__Oscillospirales;f__Ruminococcaceae;g__;s__
OTU_150	0.00183213	0	0.000343525	0.000305355	3.81694e-05	0.000877896	0.000343525	0	0	0	0	0	0.000190847	0.000114508	0.000114508	0.000114508	0.000954235	0	0.000152678	0	k__Bacteria;p__Bacteroidota;c__Bacteroidia;o__Bacteroidales;f__Prevotellaceae
OTU_151	0.00206115	0.00293904	0.000877896	0.00103057	0.000305355	0.00400779	0.000954235	0	0	0	0	7.63388e-05	0.00297721	0.000763388	0.000458033	0.0018703	0.00297721	0.000381694	0.00217566	0	k__Bacteria;p__Bacteroidota;c__Bacteroidia;o__Bacteroidales;f__Muribaculaceae;g__;s__
OTU_152	0	3.81694e-05	0	3.81694e-05	3.81694e-05	0.00064888	0.000190847	0	0	0	0	0.000190847	0.000229016	0.00110691	0.000305355	0.000114508	0.000572541	0.0241612	0.000381694	3.81694e-05	k__Bacteria;p__Firmicutes;c__Clostridia;o__Lachnospirales;f__Lachnospiraceae;g__[Ruminococcus]_torques_group;s__
OTU_153	0	0	0	7.63388e-05	0.000190847	0	0	3.81694e-05	0.00106874	0	3.81694e-05	0	0	0	0	0	0.00133593	0	0	0	k__Bacteria;p__Actinobacteriota;c__Actinobacteria;o__Bifidobacteriales;f__Bifidobacteriaceae;g__Bifidobacterium
OTU_154	0	0	0	0	3.81694e-05	0	0	0	0	0	0	0	0	0	0	0	0	0	0	3.81694e-05	k__Bacteria;p__Firmicutes;c__Clostridia;o__Lachnospirales;f__Lachnospiraceae;g__Stomatobaculum;s__
OTU_155	0	0	0	0	0	0	0	0	0	0	0	3.81694e-05	7.63388e-05	0	0	0	0	3.81694e-05	0	0	k__Bacteria;p__Actinobacteriota;c__Actinobacteria;o__Micrococcales;f__Micrococcaceae;g__Kocuria;s__Kocuria_rhizophila
OTU_156	0	0	0.000534372	0	0	0.0104584	0	0	0	0	0	0	0.00580175	0	0	0	0.0106874	0.00194664	0	0	k__Bacteria;p__Bacteroidota;c__Bacteroidia;o__Bacteroidales;f__Prevotellaceae;g__Alloprevotella
OTU_157	3.81694e-05	0	0	0.00591626	0.000572541	0	0.00347342	0	0	0	0	0	0	0.00110691	0.00198481	0	0	0	0.000534372	7.63388e-05	k__Bacteria;p__Firmicutes;c__Clostridia;o__Lachnospirales;f__Lachnospiraceae
OTU_158	0.000229016	3.81694e-05	0	0	0	0.000763388	0.000534372	0.000267186	0.000267186	0.000229016	0.000190847	0	0.000534372	0.000267186	0.000229016	0.000305355	0.000534372	0.000267186	0.000229016	0	k__Bacteria;p__Actinobacteriota;c__Actinobacteria;o__Corynebacteriales;f__Corynebacteriaceae;g__Corynebacterium;s__Corynebacterium_stationis
OTU_159	0.000229016	0	0.000419863	7.63388e-05	3.81694e-05	0.000801557	0.000190847	0	0	0	0	3.81694e-05	0.00064888	0.000572541	0.000229016	0.000916065	0.000992404	0.000114508	3.81694e-05	7.63388e-05	k__Bacteria
OTU_160	0	0	0	0	0	3.81694e-05	0	0	0	0	0	3.81694e-05	0	0	0	0	0	0	0	3.81694e-05	k__Bacteria;p__Firmicutes;c__Bacilli;o__Staphylococcales;f__Gemellaceae;g__Gemella;s__
OTU_161	0.000114508	0	0.000267186	0.000572541	0.000114508	0.000687049	0.000114508	0	0	0	0	0	0.000152678	3.81694e-05	0.000152678	0	0.000190847	0	0	0.000114508	k__Bacteria;p__Firmicutes;c__Clostridia;o__Oscillospirales;f__Ruminococcaceae;g__Ruminococcus;s__
OTU_162	0.00160311	0.000839727	0.000763388	0.00110691	3.81694e-05	0.000458033	0.000381694	0	0	0	0	7.63388e-05	0.000763388	0.000381694	0.00175579	7.63388e-05	0.00179396	0.000267186	0.00061071	0.000152678	k__Bacteria;p__Firmicutes;c__Clostridia;o__Oscillospirales;f__Ruminococcaceae;g__Ruminococcus;s__
OTU_163	0.000305355	7.63388e-05	0.000190847	0.000152678	0.000305355	0.000877896	0.00156495	0	0	0	0	0.000725219	0.000992404	0.000534372	0.00167945	0.00061071	0.000572541	0.000114508	0.00122142	0.00362609	k__Bacteria;p__Firmicutes;c__Clostridia;o__Lachnospirales;f__Lachnospiraceae;g__Lachnospiraceae_NK4A136_group;s__Lachnospiraceae_bacterium_COE1
OTU_164	0.00064888	0.000496202	0.00213749	0	3.81694e-05	0.00290087	0.000381694	0	0	0	0	0.00122142	0.00385511	0.000916065	0.000419863	0.000801557	0.00419863	0	0.00259552	0.000190847	k__Bacteria;p__Firmicutes;c__Clostridia;o__Clostridia_UCG-014;f__;g__;s__
OTU_165	0.0110691	0.00633612	0	0	0	0	0.00179396	0	0	0	0	0	0	0.000801557	0.00343525	0.0262224	0	0	0.00312989	0	k__Bacteria;p__Bacteroidota;c__Bacteroidia;o__Bacteroidales;f__Muribaculaceae;g__;s__
OTU_166	0	0	0	7.63388e-05	0.000267186	0	0	0	0	0	0	0	0	0	0	0	0	0	0	0.000229016	k__Bacteria;p__Firmicutes;c__Bacilli;o__Erysipelotrichales;f__Erysipelotrichaceae;g__Solobacterium;s__Solobacterium_moorei
OTU_167	0.00114508	0.000916065	0	0.0115653	0.000419863	0.000114508	0.000114508	3.81694e-05	0	7.63388e-05	3.81694e-05	0	0	0.000458033	0.000458033	0.000229016	0.00202298	0	0.00263369	0.000267186	k__Bacteria;p__Firmicutes;c__Clostridia;o__Lachnospirales;f__Lachnospiraceae;g__Roseburia;s__
OTU_168	0	0	0	0	0	0	0	0	0	0	0	0	3.81694e-05	0	0	0	0	0	0	0	k__Bacteria
OTU_169	0	0	0.00064888	0.00209932	0.000152678	0.000267186	0.00064888	0	0	0	0	7.63388e-05	0.000267186	0.000458033	0.000381694	3.81694e-05	0.00148861	0	0	7.63388e-05	k__Bacteria;p__Firmicutes;c__Clostridia;o__Peptostreptococcales-Tissierellales;f__Anaerovoracaceae;g__Family_XIII_AD3011_group;s__
OTU_170	0.0013741	0.00393145	3.81694e-05	0	0	0.00362609	0.000458033	0	0	0	0	3.81694e-05	0.000190847	0.00167945	0.000229016	3.81694e-05	0.000725219	0.00156495	0.000839727	0	k__Bacteria;p__Firmicutes;c__Bacilli;o__Erysipelotrichales;f__Erysipelatoclostridiaceae;g__Erysipelatoclostridium;s__
OTU_171	0.000801557	0.000801557	0.000839727	0.00293904	0.000572541	0.00263369	0.00251918	0	0	0	0	0	0.000839727	0.000877896	0.000534372	0.00118325	0.000954235	7.63388e-05	0.000916065	0.000343525	k__Bacteria;p__Firmicutes;c__Clostridia;o__Oscillospirales;f__Oscillospiraceae;g__Colidextribacter;s__
OTU_172	0.000534372	3.81694e-05	0.000152678	0.000343525	0.000763388	3.81694e-05	0.000534372	7.63388e-05	0.000152678	0.000458033	0.000114508	0.00767205	0.000496202	0.000534372	0.000572541	0.000229016	0.00293904	0.00148861	0.000229016	0.000190847	k__Bacteria;p__Firmicutes;c__Clostridia;o__Lachnospirales;f__Lachnospiraceae;g__Lachnoclostridium
OTU_173	0	3.81694e-05	0	7.63388e-05	0.000114508	7.63388e-05	0	0	0	0	0	0	0	3.81694e-05	0	0	0.00290087	0	0	0.000267186	k__Bacteria;p__Firmicutes;c__Clostridia;o__Lachnospirales;f__Lachnospiraceae;g__Blautia
OTU_174	0.000152678	0.000267186	0	0	0	0	3.81694e-05	0	0	0	0	0	0	0	0.000496202	0	0	0	3.81694e-05	0	k__Bacteria;p__Firmicutes;c__Clostridia;o__Oscillospirales;f__Ruminococcaceae;g__[Eubacterium]_siraeum_group;s__
OTU_175	0.000190847	0.000190847	0	0.0018703	0	0.000419863	0.00122142	0	0	0	0	0	0.000190847	0.000190847	0.000496202	0.000687049	0.000343525	0	0.000419863	3.81694e-05	k__Bacteria;p__unidentified_Bacteria;c__Clostridia;o__Oscillospirales;f__Ruminococcaceae;g__;s__
OTU_176	0	0	0	0	3.81694e-05	0	0	7.63388e-05	0	0	0	0	0	0	0	0	0.00351158	0	0	0	k__Bacteria;p__Firmicutes;c__Clostridia;o__Oscillospirales;f__[Eubacterium]_coprostanoligenes_group;g__;s__
OTU_177	0	0	0	0	7.63388e-05	0	0	0	0	0	0	0	0	0	0	0	0	0	0	0.000114508	k__Bacteria;p__Bacteroidota;c__Bacteroidia;o__Bacteroidales;f__Prevotellaceae;g__Prevotella;s__Prevotella_salivae
OTU_178	0	0	0	0	0.000114508	0	0	0	0	0	0	0	0	0	0	0	0	0	0	0.000152678	k__Bacteria;p__Actinobacteriota;c__Coriobacteriia;o__Coriobacteriales;f__Atopobiaceae;g__Atopobium;s__
OTU_179	0	7.63388e-05	7.63388e-05	0.00393145	0.00106874	0.000267186	0.00209932	0	0	0	0	3.81694e-05	0.00125959	0.000534372	0.00061071	0.000152678	0.00114508	0	0	0.00064888	k__Bacteria;p__Firmicutes;c__Clostridia;o__Lachnospirales;f__Lachnospiraceae;g__Lachnospiraceae_NK4A136_group;s__
OTU_180	0	3.81694e-05	7.63388e-05	0.000229016	0.000190847	0	3.81694e-05	0	0.000114508	7.63388e-05	0	7.63388e-05	0	0	0	0	0.00480934	0	0	0.000267186	k__Bacteria;p__Firmicutes;c__Clostridia;o__Oscillospirales;f__Ruminococcaceae;g__Faecalibacterium;s__Faecalibacterium_prausnitzii
OTU_181	0.000381694	0.000229016	0.000190847	0.000152678	0	0.000381694	0.000229016	0.000419863	0.000229016	0.000114508	0.000190847	0.000152678	0.00148861	0.00061071	0.000496202	0.000916065	0.00064888	3.81694e-05	0.000458033	0	k__Bacteria;p__Proteobacteria;c__Gammaproteobacteria;o__Burkholderiales;f__Sutterellaceae;g__Parasutterella;s__
OTU_182	0.00190847	0.000267186	0.000114508	0.000305355	0	0.00129776	0.000267186	3.81694e-05	0	0.000152678	0	0	0.000229016	3.81694e-05	0.000152678	0	0.000114508	0	0.000687049	0	k__Bacteria;p__Firmicutes;c__Clostridia;o__Clostridia_UCG-014;f__;g__;s__
OTU_183	0	0	0	3.81694e-05	0	0.00354975	0	0	0	0	0	0	0.0220237	0	0.000114508	0	0.0061071	0.00141227	0	0	k__Bacteria;p__Bacteroidota;c__Bacteroidia;o__Bacteroidales;f__Tannerellaceae;g__Parabacteroides;s__Parabacteroides_sp
OTU_184	0	0	0	0	0	0	0	0	0	0	0	0	0	0	0	0	0	0	0	0.000152678	k__Bacteria;p__Firmicutes;c__Clostridia;o__Peptostreptococcales-Tissierellales;f__Peptostreptococcaceae;g__Peptostreptococcus;s__
OTU_185	0	7.63388e-05	0.000114508	0.00064888	0.000114508	0.00061071	0.000305355	0	0	0	0	0	0.000305355	0.000190847	0.000801557	0.000305355	0.000305355	0	0.000916065	0	k__Bacteria;p__Firmicutes;c__Clostridia;o__Clostridia_UCG-014;f__;g__;s__
OTU_186	0	0	0	0	0	0	0	0	0	0	0	0	0	0	0	3.81694e-05	0	0	0	0	k__Bacteria;p__Firmicutes;c__Negativicutes;o__Veillonellales-Selenomonadales;f__Veillonellaceae;g__Dialister;s__Dialister_sp_Marseille-P5638
OTU_187	0	0	0	0	0.000114508	0	0	0	0	0	0	0	0	0	0	0	0	0	0	0	k__Bacteria;p__Firmicutes;c__Clostridia;o__Peptostreptococcales-Tissierellales;f__unidentified_Peptostreptococcales-Tissierellales;g__Parvimonas;s__Parvimonas_micra
OTU_188	0.00103057	0.00110691	0.000152678	0	0	0.00164128	0.00064888	3.81694e-05	0	0	0	0	0.000152678	0.00213749	0.00129776	0.000152678	0.000267186	0	0.00206115	0	k__Bacteria;p__Firmicutes;c__Clostridia;o__Lachnospirales;f__Lachnospiraceae;g__Lachnospiraceae_NK4A136_group;s__
OTU_189	7.63388e-05	0	3.81694e-05	0.0139318	0.000267186	0.000458033	0.000190847	0	0	7.63388e-05	0	0	7.63388e-05	0	7.63388e-05	7.63388e-05	0.000114508	0	7.63388e-05	0.000267186	k__Bacteria;p__Firmicutes;c__Bacilli;o__Erysipelotrichales;f__Erysipelotrichaceae;g__;s__
OTU_190	0	0.000114508	7.63388e-05	0.00904615	0.000458033	0.000152678	0.000114508	0	0	0	0	0	0.000114508	7.63388e-05	3.81694e-05	0	3.81694e-05	0	0.000152678	0.000152678	k__Bacteria;p__Bacteroidota;c__Bacteroidia;o__Bacteroidales;f__Marinifilaceae;g__Odoribacter;s__
OTU_191	0	0	0	0	0	0	0	3.81694e-05	0	0	0	0	0	0	0	0	0	0	0	0	k__Bacteria;p__Firmicutes;c__Negativicutes;o__Veillonellales-Selenomonadales;f__Selenomonadaceae;g__Megamonas;s__
OTU_192	0	0.000152678	7.63388e-05	0.000305355	0.000267186	0.000534372	0.000419863	0	0	0	0	3.81694e-05	0.00251918	0.000190847	0.000534372	0.000343525	0.0013741	0.000152678	7.63388e-05	0.000229016	k__Bacteria;p__unidentified_Bacteria;c__Clostridia;o__Lachnospirales;f__Lachnospiraceae;g__;s__
OTU_193	0.000190847	0.000190847	0.000267186	0.0037406	0.00141227	0.000763388	0.000877896	0	0	0	0	3.81694e-05	0.00354975	0.000458033	0.000725219	0.000343525	0.00114508	0.000305355	0.000534372	0.0027482	k__Bacteria
OTU_194	0	0	0	0	0	0	0.000763388	0	0	0	0	0	0	0.000305355	0.000152678	0	0	0	0	0	k__Bacteria;p__Bacteroidota;c__Bacteroidia;o__Bacteroidales;f__Muribaculaceae;g__;s__
OTU_195	0.000572541	0.000114508	0.000114508	0.000839727	0.000114508	0.000190847	0.00110691	3.81694e-05	0	0	0	0	0.000267186	0.00106874	0.000305355	0.000839727	0.000114508	0	0.000419863	3.81694e-05	k__Bacteria;p__Firmicutes;c__Clostridia;o__Monoglobales;f__Monoglobaceae;g__Monoglobus;s__
OTU_196	0	0	0	0	7.63388e-05	0	0	0	0	0	0	0	0	0	0	0	0	0	0	0.000496202	k__Bacteria;p__Proteobacteria;c__Gammaproteobacteria;o__Burkholderiales;f__Neisseriaceae;g__Neisseria;s__Neisseria_mucosa
OTU_197	0.00106874	0.00061071	0.000572541	7.63388e-05	0.000572541	0.00122142	0.000419863	7.63388e-05	0.000419863	0.000381694	0	3.81694e-05	0.000534372	0.000343525	0.000152678	0.00248101	0.00125959	0	0.00141227	0	k__Bacteria;p__Bacteroidota;c__Bacteroidia;o__Bacteroidales;f__Muribaculaceae;g__;s__
OTU_198	0	0	0	0.000496202	0.00232833	0	0	0	0	0	0	0.00209932	0	0	0	0	0	0.0018703	0	0.000190847	k__Bacteria;p__Firmicutes;c__Clostridia;o__Oscillospirales;f__Ruminococcaceae;g__Ruminococcus;s__bacterium_ic1277
OTU_199	0	0	0	0.00175579	0.000687049	0	0	0	0	0	0	0.00316806	0	0	0	0	0	0.00209932	0	0.000572541	k__Bacteria;p__Firmicutes;c__Clostridia;o__Oscillospirales;f__[Eubacterium]_coprostanoligenes_group;g__;s__
OTU_200	7.63388e-05	0.000152678	0.000763388	0.00267186	0.000801557	0.000687049	0.00064888	0	0	0	0	0	0.0023665	7.63388e-05	0.000114508	0.000916065	0.00175579	0.000190847	0.000458033	0.0042368	k__Bacteria
OTU_201	7.63388e-05	0.000687049	0.000114508	0.00164128	3.81694e-05	0.000305355	0.000190847	0	0	0	0	0	0.000343525	0.000114508	0.000267186	0.000190847	0.000343525	0	0.000534372	0.000114508	k__Bacteria;p__Firmicutes;c__Clostridia;o__Oscillospirales;f__Butyricicoccaceae;g__Butyricicoccus;s__
OTU_202	0	0	0	0	0	0.000381694	0	0.000229016	0.000381694	0.000152678	0.000114508	0	7.63388e-05	0	0	0	0	0	0	0	k__Bacteria;p__Nitrospirota;c__Nitrospira;o__Nitrospirales;f__Nitrospiraceae
OTU_203	0.000152678	0	3.81694e-05	0	0.000114508	3.81694e-05	0.000496202	0	7.63388e-05	0	0	7.63388e-05	0.000114508	0	0.000114508	0.000190847	0.000229016	0	0.000267186	0	k__Bacteria;p__Firmicutes;c__Bacilli;o__Erysipelotrichales;f__Erysipelatoclostridiaceae
OTU_204	0	0	0	0	0	0	0	0	0	0	0	0	0	0	0	0	0	0	0	0	k__Bacteria;p__Acidobacteriota;c__Acidobacteriae;o__Acidobacteriales;f__Acidobacteriaceae_(Subgroup_1);g__Acidipila;s__
OTU_205	0.000267186	0.000229016	0.000190847	0.000229016	0	0.000229016	0.000305355	0	0	0	0	0.000267186	0.00064888	0.000534372	0.000267186	0.000229016	0.000534372	0.000381694	3.81694e-05	0.000190847	k__Bacteria;p__Firmicutes;c__Clostridia;o__Lachnospirales;f__Lachnospiraceae;g__Tuzzerella;s__
OTU_206	0.000267186	0.000114508	0.00064888	0.000190847	0.000190847	0.000190847	0.000419863	0	0	0	0	0	0.000267186	0.000381694	0.000114508	0.000343525	0.000229016	0.000114508	0.000381694	3.81694e-05	k__Bacteria;p__Firmicutes;c__Clostridia;o__Oscillospirales;f__UCG-010;g__;s__
OTU_207	0.00118325	0.00125959	3.81694e-05	0	0	0.00061071	0.000152678	0	0	0	0	0	0.000343525	0.00248101	0	0	0.000534372	0.000190847	0.000725219	0	k__Bacteria;p__Firmicutes;c__Bacilli;o__Erysipelotrichales;f__Erysipelatoclostridiaceae;g__Erysipelatoclostridium;s__
OTU_208	0	0	0	0	0	3.81694e-05	0	0.000152678	7.63388e-05	0	0	0	0	0	0	0	0	0	0	0	k__Bacteria;p__Firmicutes;c__Clostridia;o__Clostridiales;f__Clostridiaceae;g__Clostridium_sensu_stricto_1;s__Clostridium_butyricum
OTU_209	0.000877896	0.000305355	0.000534372	0.000229016	0	0.00122142	0.00103057	0	0	0	0	0	0.00061071	0.00141227	0.000763388	0.00103057	0.00125959	0	0.00064888	0.000114508	k__Bacteria;p__Firmicutes;c__Clostridia;o__Oscillospirales;f__Oscillospiraceae;g__Oscillibacter;s__
OTU_210	0	0	0	0	0	0	0	0	0	0	0	0	0	0	0	0	0	0	0	3.81694e-05	k__Bacteria;p__Bacteroidota;c__Bacteroidia;o__Bacteroidales;f__Porphyromonadaceae;g__Porphyromonas;s__Porphyromonas_gingivalis
OTU_211	0.000114508	0.000114508	0.000229016	0.00244284	0.00145044	0.000305355	0.000152678	0.000190847	0.000152678	0.000114508	3.81694e-05	0	0.000190847	0.000152678	0	0	3.81694e-05	0	0.000229016	0	k__Bacteria;p__Actinobacteriota;c__Coriobacteriia;o__Coriobacteriales;f__Eggerthellaceae
OTU_212	0.00469484	0.00702317	3.81694e-05	0.000190847	0.0013741	0.000114508	0.0124814	0.0078629	0.000305355	0.000229016	0.000267186	0	0	0.0152678	0.021642	0.00351158	0.000114508	0.000267186	0.00179396	0	k__Bacteria;p__Firmicutes;c__Bacilli;o__Lactobacillales;f__Lactobacillaceae;g__Lactobacillus
OTU_213	0	0	0.000229016	0	0	0.000381694	3.81694e-05	0	0	0	0	0	0.000152678	3.81694e-05	0	0.00145044	0	7.63388e-05	0.000496202	0	k__Bacteria;p__Campilobacterota;c__Campylobacteria;o__Campylobacterales;f__Helicobacteraceae;g__Helicobacter;s__Helicobacter_hepaticus
OTU_214	0	0	0	0	0	0	0	0	0	3.81694e-05	0	0	0	0	0	0	0	0	0	0	k__Bacteria
OTU_215	3.81694e-05	0	3.81694e-05	0	3.81694e-05	0	0	3.81694e-05	3.81694e-05	0.000152678	7.63388e-05	0	0	0	0	0	0.000190847	0	0	0	k__Bacteria;p__Actinobacteriota;c__Actinobacteria;o__Bifidobacteriales;f__Bifidobacteriaceae;g__Bifidobacterium;s__Bifidobacterium_longum
OTU_216	0.00167945	0.000114508	0.000190847	0.00431314	0.000190847	0.000954235	0.000267186	0	0	7.63388e-05	7.63388e-05	7.63388e-05	0.000267186	0.000496202	0.000114508	0.000152678	0.000419863	0	3.81694e-05	0.000381694	k__Bacteria;p__Firmicutes;c__Clostridia;o__Clostridia_UCG-014;f__;g__;s__
OTU_217	3.81694e-05	3.81694e-05	0.000229016	0.00202298	0.00106874	0.000229016	0.000152678	0	0	0	0	0	0.000801557	0.000152678	7.63388e-05	0.000229016	0.000114508	7.63388e-05	7.63388e-05	0.000343525	k__Bacteria;p__unidentified_Bacteria;c__Bacilli;o__Erysipelotrichales;f__Erysipelotrichaceae;g__;s__
OTU_218	0.000267186	0.000114508	0.000343525	0.000152678	0.000190847	0.000801557	0.000496202	0	0	0	0	0.000343525	0.000687049	0.000419863	0.00133593	0.000419863	0.000954235	0	0.00061071	0.00248101	k__Bacteria;p__Firmicutes;c__Clostridia;o__Lachnospirales;f__Lachnospiraceae;g__Lachnospiraceae_NK4A136_group;s__Lachnospiraceae_bacterium_COE1
OTU_219	0.000114508	3.81694e-05	0.000229016	0.000801557	0.000114508	0.00122142	0.000496202	0	0	0	0	0	0.00106874	0.000229016	0.000458033	0.000114508	0.0013741	0.000305355	0.000152678	0.000496202	k__Bacteria;p__Firmicutes;c__Clostridia;o__Oscillospirales;f__Oscillospiraceae
OTU_220	0	0	0	0	3.81694e-05	0	0	0	0	0	0	0	0	0	0	0	0	0	0	3.81694e-05	k__Bacteria;p__Firmicutes;c__Clostridia;o__Lachnospirales;f__Lachnospiraceae;g__Oribacterium
OTU_221	0.000267186	0	0.0013741	0	0	0.000458033	0.000114508	0	0	0	0	0	3.81694e-05	0.000152678	0	0.000419863	0.000343525	0	0.000152678	0	k__Bacteria;p__Bacteroidota;c__Bacteroidia;o__Bacteroidales;f__Tannerellaceae;g__Parabacteroides
OTU_222	0	0	0	0.000687049	0.000839727	0	0	0	0	0	0	0.00148861	0	0	0	0	0.000496202	0.0018703	0	0.00217566	k__Bacteria;p__Firmicutes;c__Clostridia;o__Oscillospirales;f__Ruminococcaceae;g__Subdoligranulum;s__
OTU_223	7.63388e-05	0	0.000305355	0	0	0.00259552	0.000419863	0	0	0	0	0	0.00671781	0.00061071	0.000267186	0.000343525	0.000725219	0	0.000267186	0.00106874	k__Bacteria;p__Firmicutes;c__Clostridia;o__Lachnospirales;f__Lachnospiraceae
OTU_224	0.00912249	0.0140082	3.81694e-05	0.000763388	7.63388e-05	0.000190847	0.000534372	0	0	3.81694e-05	3.81694e-05	0	0.000801557	0.000916065	0.00148861	0	0.000190847	3.81694e-05	0.000725219	0	k__Bacteria;p__Firmicutes;c__Clostridia;o__Lachnospirales;f__Lachnospiraceae;g__Roseburia;s__
OTU_225	0	0	0	0	0.000152678	0	0	0	0	0	0	0	0	0	0	0	0	0	0	3.81694e-05	k__Bacteria;p__Firmicutes;c__Clostridia;o__Clostridia_UCG-014;f__unidentified_Clostridia_UCG-014;g__unidentified_Clostridia_UCG-014;s__Clostridiales_bacterium_oral_taxon_075
OTU_226	0.00171762	0.000839727	0.00198481	0.00702317	0.000267186	0.00271003	0.00167945	0	0	0	0	3.81694e-05	0.00183213	0.00164128	0.00118325	0.000916065	0.000877896	0.000114508	0.00114508	0.000801557	k__Bacteria
OTU_227	0.000190847	3.81694e-05	0.000114508	0.00114508	0	0.000381694	0.000267186	0	0	0	0	0	0.000152678	3.81694e-05	0	7.63388e-05	0.000305355	0	0.000229016	0.000114508	k__Bacteria;p__unidentified_Bacteria;c__Clostridia;o__Oscillospirales;f__Ruminococcaceae;g__unidentified_Ruminococcaceae;s__[Clostridium]_leptum
OTU_228	0.000152678	0	3.81694e-05	0.000839727	0	0.000687049	0.000458033	0	0	0	0	0	0.000190847	0.000458033	0.000114508	0.000305355	7.63388e-05	0	0.000381694	7.63388e-05	k__Bacteria;p__Firmicutes;c__Clostridia;o__unidentified_Clostridia;f__Ruminococcaceae;g__;s__
OTU_229	0	0	0.000877896	0.00202298	0.00225199	0.00129776	0.000152678	0	0	0	0	0	0.00469484	0.000381694	0.000381694	0	0.00110691	0	3.81694e-05	0.00133593	k__Bacteria;p__Firmicutes;c__Clostridia;o__Lachnospirales;f__Lachnospiraceae;g__Roseburia;s__
OTU_230	0.00114508	0.000534372	0.00160311	0.0156876	7.63388e-05	0.000992404	0.000343525	0	0	0	0	3.81694e-05	0.00133593	0.000725219	0.000687049	0.00110691	0.00125959	0.00061071	0.000572541	0.000381694	k__Bacteria;p__Firmicutes;c__Clostridia;o__Lachnospirales;f__Lachnospiraceae
OTU_231	0.000801557	0.000954235	0.000114508	0.000496202	0.00129776	0.000114508	0.000229016	0	3.81694e-05	0	0	0.000229016	3.81694e-05	0.000229016	0.00106874	0.000152678	0.000343525	0.000343525	0.000877896	0.000305355	k__Bacteria
OTU_232	0.00167945	0.00179396	0	3.81694e-05	3.81694e-05	0.000190847	0	0	0	0	0	0.000725219	0.000114508	0	0	0	0.00500019	0.000572541	0.000190847	7.63388e-05	k__Bacteria;p__Firmicutes;c__Clostridia;o__Lachnospirales;f__Lachnospiraceae;g__Roseburia
OTU_233	0.000114508	0	0.00064888	0.00106874	0.00164128	0.000305355	0.00145044	3.81694e-05	7.63388e-05	3.81694e-05	7.63388e-05	0.000114508	0.000305355	0.000152678	0.000458033	7.63388e-05	0	7.63388e-05	0.000190847	0	k__Bacteria;p__Actinobacteriota;c__Coriobacteriia;o__Coriobacteriales;f__Eggerthellaceae;g__Enterorhabdus;s__
OTU_234	0.000114508	7.63388e-05	0.000267186	3.81694e-05	3.81694e-05	0.000305355	0.000190847	0	0	0	0	0	0.000381694	0.000190847	0	0.000801557	0.000190847	0	0.000152678	3.81694e-05	k__Bacteria;p__Bacteroidota;c__Bacteroidia;o__Bacteroidales;f__Muribaculaceae;g__;s__
OTU_235	0.000152678	0.000343525	7.63388e-05	0.000801557	0.000114508	7.63388e-05	7.63388e-05	0	3.81694e-05	0	0	3.81694e-05	0	0.000190847	0.000152678	0.00064888	0.0332074	0.000343525	0.000229016	0.000229016	k__Bacteria;p__Bacteroidota;c__Bacteroidia;o__Bacteroidales;f__Bacteroidaceae;g__Bacteroides;s__Bacteroides_dorei
OTU_236	0	0	0	0	0	0	0	0.000305355	0.000229016	0.000267186	0.000229016	0.00061071	3.81694e-05	0	0	0	0	0	0	7.63388e-05	k__Bacteria;p__Proteobacteria;c__Alphaproteobacteria;o__Sphingomonadales;f__Sphingomonadaceae;g__Sphingomonas;s__
OTU_237	0	0	0.0256498	0	0	0	0	0	0	0	0	0	0	0	0	0	0	0	0	0	k__Bacteria;p__Bacteroidota;c__Bacteroidia;o__Flavobacteriales;f__Weeksellaceae;g__Elizabethkingia;s__Elizabethkingia_anophelis
OTU_238	0	0	0	0	0	0	0	0	0.000725219	0	0	7.63388e-05	0	0	0	3.81694e-05	0	0	0	0	k__Bacteria;p__Firmicutes;c__Bacilli;o__Lactobacillales;f__Lactobacillaceae;g__Lactobacillus;s__Lactobacillus_mucosae
OTU_239	0	3.81694e-05	3.81694e-05	0.000267186	0.000877896	3.81694e-05	0.000190847	0	0	0	0	0	7.63388e-05	0.000152678	0.000114508	0	0	0	0	0.000305355	k__Bacteria
OTU_240	0	0	0.00125959	3.81694e-05	0	0.00202298	3.81694e-05	0	3.81694e-05	0	0	0.000114508	0.000381694	0	0	0	0.000763388	0.00263369	0	0.000839727	k__Bacteria;p__Firmicutes;c__Bacilli;o__Lactobacillales;f__Streptococcaceae;g__Lactococcus;s__Lactococcus_lactis
OTU_241	0	0	0	0	0	0	0	0	0	0	0	0	0	0	0	0	0	0	0	0	k__Bacteria;p__Proteobacteria;c__Gammaproteobacteria;o__Enterobacterales;f__Morganellaceae;g__Providencia
OTU_242	0	0	0	0.000534372	0.000839727	0	0	0	0	0	0	3.81694e-05	0	0	0	0	0	0	0	0.00167945	k__Bacteria
OTU_243	0	0.000114508	0	0	0	0	7.63388e-05	0.000267186	0	3.81694e-05	0	0	0	0	3.81694e-05	0.000190847	0	0	0	0	k__Bacteria;p__Firmicutes;c__Bacilli;o__Bacillales;f__Planococcaceae;g__Sporosarcina;s__
OTU_244	0.000229016	3.81694e-05	0.000152678	0.000190847	7.63388e-05	0.000190847	7.63388e-05	0	3.81694e-05	0	0	0	0	3.81694e-05	0	0.000152678	3.81694e-05	0	7.63388e-05	0	k__Bacteria;p__Bacteroidota;c__Bacteroidia;o__Bacteroidales;f__Muribaculaceae;g__;s__
OTU_245	0.000992404	0.000190847	0	0	0	0	0.000267186	0	0	0	0	0	0	0	0	0.00641246	0	0	0	0	k__Bacteria;p__Bacteroidota;c__Bacteroidia;o__Bacteroidales;f__Prevotellaceae;g__Prevotellaceae_NK3B31_group;s__
OTU_246	0	0	0	0	0.000267186	0	0	0	0	0	0	0	0	0	0	0	0	0	0	0.00064888	k__Bacteria;p__Bacteroidota;c__Bacteroidia;o__Bacteroidales;f__Prevotellaceae;g__Alloprevotella;s__
OTU_247	0	0	0	0.000114508	0.000190847	0	0	0	0	3.81694e-05	0	0	0	0	0	0	0	0	0	0.000419863	k__Bacteria;p__Firmicutes;c__Negativicutes;o__Veillonellales-Selenomonadales;f__Veillonellaceae;g__Dialister;s__
OTU_248	0	0	0	0	0.000114508	0	0	0	0	0	0	0	0	0	0	0	0	3.81694e-05	0	0.000458033	k__Bacteria;p__Bacteroidota;c__Bacteroidia;o__Bacteroidales;f__Prevotellaceae;g__Prevotella;s__Prevotella_jejuni
OTU_249	0	0	0	0	0	0	0	0	0	0	0	0	0	0	0	0	0	0	0	0	k__Bacteria;p__Proteobacteria;c__Alphaproteobacteria;o__Acetobacterales;f__Acetobacteraceae;g__Komagataeibacter;s__Komagataeibacter_saccharivorans
OTU_250	0.000114508	0	0.000114508	0.000839727	0.00354975	0.000267186	0.000152678	0	0	0	0	0	0.000114508	3.81694e-05	7.63388e-05	0	0.000152678	0	3.81694e-05	7.63388e-05	k__Bacteria;p__unidentified_Bacteria;c__Clostridia;o__Lachnospirales;f__Lachnospiraceae;g__;s__
OTU_251	7.63388e-05	0.000114508	0.000190847	0.00202298	3.81694e-05	0.000381694	0.000152678	3.81694e-05	0	0	0	0	0.000687049	0.000114508	0.000152678	0.000114508	0.000877896	7.63388e-05	0.000190847	3.81694e-05	k__Bacteria
OTU_252	0	0	0	0	0.000114508	0	0	0	0	0	0	0	0	0	0	0	0	0	0	7.63388e-05	k__Bacteria;p__Firmicutes;c__Clostridia;o__Clostridia_UCG-014;f__;g__;s__
OTU_253	0	0	0	0	0	0	0	0	0	0	0	0	0	0	0	0	0	0	0	0	k__Bacteria;p__Firmicutes;c__Clostridia;o__Lachnospirales;f__Lachnospiraceae;g__Johnsonella;s__
OTU_254	0	7.63388e-05	3.81694e-05	0	0	0.000114508	0.00213749	0	0	0	0	3.81694e-05	3.81694e-05	0.00167945	0.0013741	0.000229016	0.000152678	0	0	0	k__Bacteria;p__Firmicutes;c__Clostridia;o__Oscillospirales;f__Ruminococcaceae;g__Ruminococcus;s__
OTU_255	0	0	0	0	0	0	0	0	0	0	0	0	0	0	0	0	0	0	0	0	k__Bacteria;p__Bacteroidota;c__Bacteroidia;o__Bacteroidales;f__Porphyromonadaceae;g__Porphyromonas;s__Porphyromonas_endodontalis
OTU_256	0.000190847	0.000229016	0.000190847	0	0	0.000916065	0	0	0	0	0	0	0.00164128	3.81694e-05	0.000114508	0	0.00190847	0.000190847	0.000267186	0	k__Bacteria;p__Bacteroidota;c__Bacteroidia;o__Bacteroidales;f__Rikenellaceae;g__Alistipes
OTU_257	0.000343525	0.000305355	7.63388e-05	0.00103057	3.81694e-05	0	0.00114508	0	0	0	0	0	7.63388e-05	0.000381694	0.000458033	0.000496202	0.000152678	0.000114508	0.000343525	0.000190847	k__Bacteria;p__unidentified_Bacteria;c__Clostridia;o__Peptococcales;f__Peptococcaceae;g__;s__
OTU_258	7.63388e-05	0.000152678	3.81694e-05	0	0	0.00106874	0	0	0	3.81694e-05	0	0	0.000152678	3.81694e-05	0.000114508	0	0.000114508	0	0	0	k__Bacteria;p__Firmicutes;c__Clostridia;o__Lachnospirales;f__Lachnospiraceae
OTU_259	0.00198481	0.00312989	0.000381694	0.000229016	0.000190847	0.000381694	0.000343525	3.81694e-05	3.81694e-05	0	0.000152678	0	7.63388e-05	0.00133593	0.00133593	7.63388e-05	0.000114508	0.000572541	0.000152678	3.81694e-05	k__Bacteria;p__Firmicutes;c__Clostridia;o__Lachnospirales;f__Lachnospiraceae;g__A2;s__
OTU_260	0	0	0	0	0.000114508	0	0	0	0	0	0	0	0	0	0	0	0	0	0	0	k__Bacteria;p__Firmicutes;c__Clostridia;o__Lachnospirales;f__Lachnospiraceae;g__Catonella;s__
OTU_261	0	0	0	0	0	0	0	0	0	0	0	0	0	0	0	0	0	0	7.63388e-05	0	k__Bacteria;p__Firmicutes;c__Bacilli;o__Lactobacillales;f__Lactobacillaceae;g__Lactobacillus;s__Lactobacillus_aviarius
OTU_262	0	0	0	0	0	0	0	0	0	0	0	0	0	0	0	0	0	0	0	0	k__Bacteria;p__Acidobacteriota;c__Acidobacteriae;o__Bryobacterales;f__Bryobacteraceae;g__Bryobacter
OTU_263	0	3.81694e-05	0	0	0	7.63388e-05	0	0	0	0	0	0	0.000190847	0	0	0	0.000419863	0	0.000190847	0	k__Bacteria;p__Actinobacteriota;c__Actinobacteria;o__Corynebacteriales;f__Corynebacteriaceae;g__Corynebacterium
OTU_264	0.000114508	0	0.000458033	0.000343525	0	0.000381694	0.000190847	0	0	0	0	7.63388e-05	0.000305355	0.000496202	0.000343525	0.000114508	0.000114508	0	7.63388e-05	3.81694e-05	k__Bacteria;p__Desulfobacterota;c__Desulfovibrionia;o__Desulfovibrionales;f__Desulfovibrionaceae;g__Bilophila;s__
OTU_265	0	0	0	0	0	0	0	0	0	0	0	0	0	0	0	0	0	7.63388e-05	0	0	k__Bacteria;p__Proteobacteria;c__Gammaproteobacteria;o__Pseudomonadales;f__Moraxellaceae;g__Acinetobacter;s__Acinetobacter_ursingii
OTU_266	0.00129776	3.81694e-05	0.000229016	0.000114508	0	0.000343525	0.000152678	0	0	0	0	0	0.000114508	0.000419863	3.81694e-05	0	7.63388e-05	0	0	0	k__Bacteria;p__Firmicutes;c__Clostridia;o__Clostridia_vadinBB60_group;f__;g__;s__
OTU_267	0.000152678	0.000114508	0.000114508	0.000763388	0.000114508	0.000267186	0.000229016	0	0	0	0	3.81694e-05	0.000763388	0.000190847	0.000381694	0	0.000534372	0	0.000190847	0.000725219	k__Bacteria;p__unidentified_Bacteria;c__Clostridia;o__Peptococcales;f__Peptococcaceae;g__;s__
OTU_268	0	0	0	0	0	0	0	0	0	0	0	3.81694e-05	0	0	0	0	0	0.000114508	0	0.000114508	k__Bacteria;p__Firmicutes;c__Bacilli;o__Bacillales;f__Bacillaceae;g__Bacillus;s__Bacillus_funiculus
OTU_269	0	0	0	0.000343525	0.000687049	0	0	0	0	0	0	0.000954235	0	0	0	0	0	0.000992404	0	0.000877896	k__Bacteria;p__Firmicutes;c__Clostridia;o__Oscillospirales;f__Oscillospiraceae;g__UCG-005;s__
OTU_270	0	0	0	0.000916065	0.000458033	0	0	0	0	0	0	0	0	0	0	0	0	0	0	0.00114508	k__Bacteria;p__Firmicutes;c__Clostridia;o__Oscillospirales;f__Oscillospiraceae;g__NK4A214_group;s__
OTU_271	0.000190847	7.63388e-05	7.63388e-05	3.81694e-05	0	0.000267186	0	0	0	0	0	0	0.000152678	0	7.63388e-05	0.000305355	0.000343525	0	0.000114508	0.000496202	k__Bacteria
OTU_272	0.000190847	0.000114508	0	0.000267186	0	0	0.000458033	0	0	0	0	0	0	0.000190847	0.000229016	0.000419863	0	0	7.63388e-05	0	k__Bacteria;p__unidentified_Bacteria;c__Clostridia;o__Oscillospirales;f__Oscillospiraceae;g__;s__
OTU_273	0	0	0.0018703	0	0	0.00656514	0	0	0	0	0	0	0.0042368	0	0	0	0.0061071	0	0	0	k__Bacteria;p__Firmicutes;c__Bacilli;o__Erysipelotrichales;f__Erysipelotrichaceae;g__Allobaculum;s__
OTU_274	3.81694e-05	0	0.000190847	3.81694e-05	3.81694e-05	0	0.000152678	0	0	0	0	0	0	0.000114508	7.63388e-05	0	7.63388e-05	7.63388e-05	3.81694e-05	0.000152678	k__Bacteria;p__Firmicutes;c__Clostridia;o__Oscillospirales;f__Ruminococcaceae;g__Anaerotruncus;s__
OTU_275	0	0	0	0	0	0	0	0	0	0	0	0	0	0	0	0	0	0	0	0	k__Bacteria;p__unidentified_Bacteria;c__Bacteroidia;o__Chitinophagales;f__Chitinophagaceae;g__;s__
OTU_276	0.000190847	0	0.000687049	0	0	0.000229016	0.000534372	0	0	0	0	3.81694e-05	0.000267186	0.000419863	0.000152678	3.81694e-05	0.000458033	3.81694e-05	0.000152678	0	k__Bacteria;p__Firmicutes;c__Clostridia;o__Christensenellales;f__Christensenellaceae;g__Christensenellaceae_R-7_group;s__
OTU_277	0	0	0	0	3.81694e-05	0	0	0	0	0	0	0	0	0	0	0	0	0	0	0.000114508	k__Bacteria;p__Firmicutes;c__Clostridia;o__Peptostreptococcales-Tissierellales;f__Anaerovoracaceae;g__[Eubacterium]_nodatum_group
OTU_278	0	0	0	0.00145044	0.00118325	0	0	0	0	0	0	0.00118325	0	0	0	0	0.000305355	0.00064888	0	0.00251918	k__Bacteria;p__Firmicutes;c__Clostridia;o__Oscillospirales;f__Oscillospiraceae;g__UCG-002;s__
OTU_279	0	0	0	0	0	7.63388e-05	0	0	0	0	0	0	0	0	0	0	0	0	0	0	k__Bacteria;p__Firmicutes;c__Bacilli;o__Erysipelotrichales;f__Erysipelatoclostridiaceae;g__Candidatus_Stoquefichus;s__
OTU_280	0	3.81694e-05	3.81694e-05	7.63388e-05	0	0.000305355	0.000190847	0	0	0	0	0	0.000152678	7.63388e-05	0.000114508	0.000114508	0	0	7.63388e-05	0	k__Bacteria;p__Firmicutes;c__Clostridia;o__Clostridia_vadinBB60_group;f__;g__;s__
OTU_281	3.81694e-05	0.000114508	0.000190847	0	0	0.000458033	0.000152678	0	0	0	0	0	0.000152678	0.000114508	7.63388e-05	0	7.63388e-05	0	0.000343525	0	k__Bacteria;p__Firmicutes;c__Clostridia;o__Oscillospirales;f__Oscillospiraceae;g__UCG-005;s__
OTU_282	0	0	0	0	0	0	0	0	7.63388e-05	0	3.81694e-05	0	0.000305355	0	0	0	0	0	0	0	k__Bacteria;p__Firmicutes;c__Bacilli;o__Bacillales;f__Bacillaceae;g__Bacillus;s__Bacillus_asahii
OTU_283	3.81694e-05	0	0	0.000229016	0	0	0	0	0.000114508	0	0	0	0	0	0	0	0	0	0	0	k__Bacteria;p__Actinobacteriota;c__Coriobacteriia;o__Coriobacteriales;f__Eggerthellaceae;g__Enterorhabdus;s__
OTU_284	0	0	0	0	0	0	0	0	0	0	0	0	0	0	0.000152678	0	0	0	0	0	k__Bacteria;p__Firmicutes;c__Clostridia;o__Clostridia_vadinBB60_group;f__;g__;s__
OTU_285	0	0	0	0.000114508	3.81694e-05	0	0	0	0	0	0	0.000534372	0	0	0	0	7.63388e-05	0.000496202	0	7.63388e-05	k__Bacteria;p__Firmicutes;c__Clostridia;o__Oscillospirales;f__Oscillospiraceae;g__NK4A214_group;s__
OTU_286	0.000114508	0.000114508	3.81694e-05	0	0	0	0	0	0	0	0	0	0	0.000229016	0	0	0	0.000763388	0.000190847	3.81694e-05	k__Bacteria;p__Firmicutes;c__Clostridia;o__Lachnospirales;f__Lachnospiraceae;g__[Eubacterium]_fissicatena_group;s__
OTU_287	0	0	0	0	0	0	0	0	0	0	0	0	0	0	0	0	0	0	0	0	k__Bacteria;p__Proteobacteria;c__Alphaproteobacteria;o__Acetobacterales;f__Acetobacteraceae;g__Gluconobacter
OTU_288	0.000190847	7.63388e-05	0.000267186	0.00106874	3.81694e-05	0.000305355	0.000267186	0	0	0	0	0	0.000496202	0.000496202	0.000343525	0.000534372	0.00122142	7.63388e-05	0.000305355	0.000190847	k__Bacteria
OTU_289	0	0	0	0	0	0	0	0	0	0	0	0	0	0	0	0	0	0	0	0	k__Bacteria;p__Proteobacteria;c__Gammaproteobacteria;o__Alteromonadales;f__Alteromonadaceae;g__Rheinheimera
OTU_290	0	0	0	0	0.000305355	0	0	0	0	0	0	0	0	0	0	0	0	0	0	0.000114508	k__Bacteria;p__Bacteroidota;c__Bacteroidia;o__Bacteroidales;f__Prevotellaceae;g__Prevotella;s__Prevotella_pallens
OTU_291	0.000152678	0	0.000229016	0	0	0.00110691	0	0	3.81694e-05	0	0	0	0.000152678	0	0.000381694	7.63388e-05	0.000114508	0	0	0	k__Bacteria
OTU_292	0.00458033	0.00732852	0.00114508	3.81694e-05	0	7.63388e-05	0.000190847	0	0	0	0	0	0.000114508	0.00152678	0.00198481	0.00171762	0.000305355	0	0.00114508	0	k__Bacteria;p__Firmicutes;c__Clostridia;o__Lachnospirales;f__Lachnospiraceae;g__Lachnospiraceae_NK4A136_group
OTU_293	0.000114508	7.63388e-05	0.000496202	0.000725219	7.63388e-05	0.000305355	0	0	0	0	0	0	7.63388e-05	0.000190847	0.000152678	3.81694e-05	0.000152678	0.000190847	0.000229016	0	k__Bacteria;p__Firmicutes;c__Clostridia;o__Oscillospirales;f__Ruminococcaceae;g__Anaerotruncus;s__
OTU_294	7.63388e-05	0.000343525	0	0	0	0	3.81694e-05	0	0	0	0	3.81694e-05	0.000114508	3.81694e-05	0	0.000114508	3.81694e-05	0	3.81694e-05	0	k__Bacteria;p__Cyanobacteria;c__Cyanobacteriia;o__Chloroplast;f__unidentified_Chloroplast;g__unidentified_Chloroplast;s__Citrus_maxima
OTU_295	0	0	0	0	7.63388e-05	0	0	0	0	0	0	0	0	0	0	0	0	0	0	0.000114508	k__Bacteria;p__Bacteroidota;c__Bacteroidia;o__Bacteroidales;f__Prevotellaceae;g__Alloprevotella;s__Alloprevotella_tannerae
OTU_296	0.000190847	0.000152678	0.000305355	0.000114508	3.81694e-05	0.000877896	0.000343525	0	0	0	0	0	0.000305355	0.000114508	0.000267186	0	0.000114508	0	7.63388e-05	0	k__Bacteria
OTU_297	0	0	0	3.81694e-05	0.000190847	0.000152678	0.00213749	0	0	0	0	0	0	0.000343525	0.000839727	0	0	0	0	3.81694e-05	k__Bacteria;p__unidentified_Bacteria;c__Bacilli;o__Erysipelotrichales;f__Erysipelotrichaceae;g__;s__
OTU_298	0.000114508	0.000229016	0.000572541	0.00125959	0.00129776	0.000152678	3.81694e-05	0	0	3.81694e-05	3.81694e-05	0.000419863	0.000305355	0.000229016	3.81694e-05	0.000114508	0.000229016	0	7.63388e-05	0.000114508	k__Bacteria;p__Firmicutes;c__Clostridia;o__Peptostreptococcales-Tissierellales;f__Anaerovoracaceae;g__[Eubacterium]_brachy_group;s__
OTU_299	0	0	0	0	0.000229016	0	0	0	0	0	0	0.00110691	0	0	0	0	0	0.00114508	0	0.00114508	k__Bacteria;p__unidentified_Bacteria;c__Bacilli;o__Erysipelotrichales;f__Erysipelotrichaceae;g__;s__
OTU_300	0	0	3.81694e-05	3.81694e-05	0.000152678	0.000267186	7.63388e-05	0	0	0	0	0	3.81694e-05	7.63388e-05	7.63388e-05	0	0.000229016	0	0	0.000114508	k__Bacteria;p__Firmicutes;c__Clostridia;o__Lachnospirales;f__Lachnospiraceae;g__[Eubacterium]_ventriosum_group;s__
OTU_301	0.00332074	0.00969503	0	0	0	0	0.000152678	0	0	0	0	0	0	0.000534372	0.000381694	0.000343525	0	0	0.000458033	0	k__Bacteria;p__Firmicutes;c__Clostridia;o__Lachnospirales;f__Lachnospiraceae;g__Lachnospiraceae_NK4A136_group;s__
OTU_302	0.000190847	0.000190847	0.000190847	0.00103057	0	0.000229016	0.000419863	0	0	0	0	0	0.000381694	0.000419863	0.000381694	3.81694e-05	0.000458033	0	0.000114508	0	k__Bacteria;p__unidentified_Bacteria;c__Clostridia;o__Oscillospirales;f__Ruminococcaceae;g__;s__
OTU_303	0	0	0	0.000267186	0.000763388	0	0	0	0	0	0	7.63388e-05	0	0	0	0	0	0.000229016	0	0.000687049	k__Archaea;p__Euryarchaeota;c__Methanobacteria;o__Methanobacteriales;f__Methanobacteriaceae;g__Methanobrevibacter;s__Methanobrevibacter_smithii
OTU_304	0.00183213	0.00404596	0	0	0	0	0.00061071	0	0	0	0	0	0	0.000305355	0.000419863	0.000687049	0.000114508	0	0.0023665	0	k__Bacteria;p__Bacteroidota;c__Bacteroidia;o__Bacteroidales;f__Muribaculaceae;g__;s__
OTU_305	7.63388e-05	0	0	0	0	0	0	0	7.63388e-05	0	0.000152678	0.00190847	0	0	0	0	0	0.000305355	0.000114508	0.000496202	k__Bacteria;p__Firmicutes;c__Clostridia;o__Peptostreptococcales-Tissierellales;f__Peptostreptococcaceae;g__Terrisporobacter;s__
OTU_306	0.000381694	0	0.000229016	0.00156495	3.81694e-05	0.000152678	0.000267186	0	0	0	0	0	0.000763388	0.000152678	7.63388e-05	0	0.000458033	7.63388e-05	0	0.000152678	k__Bacteria;p__Firmicutes;c__Clostridia;o__unidentified_Clostridia;f__Ruminococcaceae;g__unidentified_Ruminococcaceae;s__Acutalibacter_muris
OTU_307	0	0	0	0	0.000114508	0	0	0	0	0	0	0	0	0	0	0	0	0	0	3.81694e-05	k__Bacteria;p__Bacteroidota;c__Bacteroidia;o__Bacteroidales;f__Prevotellaceae;g__Alloprevotella;s__Prevotella_sp_oral_clone_BU035
OTU_308	0	0	0	0	0	0	0	0	0	0	0	0	0	0	0	0	7.63388e-05	0	0	0	k__Bacteria;p__Firmicutes;c__Bacilli;o__Lactobacillales;f__Streptococcaceae;g__Streptococcus;s__Streptococcus_anginosus
OTU_309	0	0	0	0	0	0.000305355	0	0	0	0	3.81694e-05	0	3.81694e-05	0	0	0	0	0	0	3.81694e-05	k__Bacteria
OTU_310	0	0	0	0	3.81694e-05	3.81694e-05	0	0	0	0	0	0	0	0	0	0	3.81694e-05	0	0	0	k__Bacteria;p__Proteobacteria;c__Gammaproteobacteria;o__Aeromonadales;f__Aeromonadaceae;g__Aeromonas;s__Aeromonas_caviae
OTU_311	0	0	0	0	0	0	0	0	0	0	0	0	0	0	0	0	0	0	0	0	k__Bacteria
OTU_312	0	0	0	0	0	0	0	0	0	0	0	0	0	0	0	0	0	0	0	0	k__Bacteria;p__unidentified_Bacteria;c__Thermoleophilia;o__Gaiellales;f__;g__;s__
OTU_313	0	0	0.000419863	0	3.81694e-05	0	0	0	0	0	0	0.000114508	0	0	0	0	0	0.0018703	0	0	k__Bacteria;p__Campilobacterota;c__Campylobacteria;o__Campylobacterales;f__Helicobacteraceae;g__Helicobacter
OTU_314	0	0	7.63388e-05	0.000152678	0.000419863	0.00232833	0	0	0	0	0	0.000152678	0.00267186	0	0	0	0.00194664	7.63388e-05	0	0.000496202	k__Bacteria;p__Firmicutes;c__Clostridia;o__Oscillospirales;f__Ruminococcaceae;g__UBA1819;s__
OTU_315	0	0	0.000343525	3.81694e-05	0.000496202	3.81694e-05	7.63388e-05	0	0	3.81694e-05	3.81694e-05	0	7.63388e-05	0	0	7.63388e-05	3.81694e-05	0.000152678	0	0.000114508	k__Bacteria
OTU_316	0	0	0	0	0.000343525	0	0	0	0	0	0	0	0	0	0	0	0	0	0	7.63388e-05	k__Bacteria;p__Campilobacterota;c__Campylobacteria;o__Campylobacterales;f__Campylobacteraceae;g__Campylobacter;s__Campylobacter_showae
OTU_317	0	0	0	0	0	0	3.81694e-05	0	0	0	0	0	0	3.81694e-05	7.63388e-05	7.63388e-05	0	0	0.000114508	0	k__Bacteria;p__Firmicutes;c__Clostridia;o__Clostridia_UCG-014;f__;g__;s__
OTU_318	3.81694e-05	0	0.000343525	0.000114508	0.000114508	0.000687049	7.63388e-05	0	0	0.000152678	0	0	0	0.000152678	0.000190847	0.000305355	0.000190847	0	3.81694e-05	0	k__Bacteria;p__Bacteroidota;c__Bacteroidia;o__Bacteroidales;f__Muribaculaceae;g__;s__
OTU_319	0.000190847	3.81694e-05	0.000114508	0.000114508	3.81694e-05	0.000152678	0	0	0	0	0	0	0.000572541	3.81694e-05	0.000305355	0.000152678	0.000229016	0.000114508	3.81694e-05	0.000190847	k__Bacteria;p__Firmicutes;c__Clostridia;o__Lachnospirales;f__Lachnospiraceae;g__Blautia;s__Lachnospiraceae_bacterium_615
OTU_320	0	0	3.81694e-05	0.000534372	0.000534372	0	0	0	0	0	0	0	0	0	0	0	0.00156495	0	0	0.000687049	k__Bacteria;p__Firmicutes;c__Clostridia;o__Lachnospirales;f__Lachnospiraceae;g__[Eubacterium]_hallii_group;s__
OTU_321	0.00156495	0.00221382	0	0	0	0	0.000534372	0	0	0	0	0	0	0.000190847	0.000458033	0.000381694	0	0	0.00103057	0	k__Bacteria;p__Bacteroidota;c__Bacteroidia;o__Bacteroidales;f__Muribaculaceae;g__;s__
OTU_322	0	0	0	0	0	0	0	0	0	0	0	0	0	0	0	0	0	0	0	0	k__Bacteria;p__Proteobacteria;c__Gammaproteobacteria;o__Pseudomonadales;f__Moraxellaceae;g__Acinetobacter;s__Acinetobacter_baumannii
OTU_323	0.00175579	0.00152678	0	0.000534372	0	0	7.63388e-05	0	0	0	0	0.000267186	0	0.000152678	0.000458033	0	0	0.000190847	0.000954235	0	k__Bacteria;p__Desulfobacterota;c__Desulfovibrionia;o__Desulfovibrionales;f__Desulfovibrionaceae;g__Bilophila;s__
OTU_324	0	0	0	0	3.81694e-05	0	0	0	0	0	0	0	0	0	0	0	0	0	0	0	k__Bacteria;p__Bacteroidota;c__Bacteroidia;o__Bacteroidales;f__Prevotellaceae;g__Prevotella;s__Prevotella_shahii
OTU_325	0	0	0	0	3.81694e-05	0	0	0	0	0	0	0	0	0	0	0	3.81694e-05	0	0	3.81694e-05	k__Bacteria;p__Actinobacteriota;c__Actinobacteria;o__Actinomycetales;f__Actinomycetaceae;g__Actinomyces;s__Schaalia_odontolytica
OTU_326	0.000114508	0	3.81694e-05	0	3.81694e-05	3.81694e-05	0	0	0	0	0	0	0	0	0	0	0.000114508	0	7.63388e-05	0	k__Bacteria;p__Bacteroidota;c__Bacteroidia;o__Bacteroidales;f__Marinifilaceae;g__Butyricimonas
OTU_327	0.000267186	0.000381694	0	0	0	0	0	0.000114508	0.000114508	7.63388e-05	3.81694e-05	0	0	0.00061071	0.000496202	0	0	0	0	0	k__Bacteria;p__Firmicutes;c__Clostridia;o__Clostridiales;f__Clostridiaceae;g__Clostridium_sensu_stricto_1;s__Clostridium_sp_ND2
OTU_328	0	0	0	0	0	0	0	0	0	0	0	0	0	0	0	0	0	0	0	0	k__Bacteria;p__Bacteroidota;c__Bacteroidia;o__Bacteroidales;f__Prevotellaceae;g__Prevotella;s__Prevotella_aurantiaca
OTU_329	0	0	0.000114508	7.63388e-05	3.81694e-05	0.000458033	0.00198481	0	0	0	0	0	0.000190847	0.00064888	0.000763388	0	0.000152678	0	0	0	k__Bacteria;p__Firmicutes;c__Clostridia;o__Clostridia_vadinBB60_group;f__;g__;s__
OTU_330	0	0	0	0	3.81694e-05	0	0	0	0	0	0	0	0	0	0	0	0	0	0	0	k__Bacteria;p__Bacteroidota;c__Bacteroidia;o__Flavobacteriales;f__Flavobacteriaceae;g__Capnocytophaga;s__Capnocytophaga_gingivalis
OTU_331	0	0	0	0	7.63388e-05	0	0	0	0	0	0	0	0	0	0	0	0	0	0	0.000152678	k__Bacteria;p__Fusobacteriota;c__Fusobacteriia;o__Fusobacteriales;f__Leptotrichiaceae;g__Leptotrichia
OTU_332	0.000114508	0	0.000114508	0.000343525	3.81694e-05	0.000114508	0	0	0	0	0	0	0	3.81694e-05	0.000152678	0	7.63388e-05	0	0.000152678	0	k__Bacteria;p__Bacteroidota;c__Bacteroidia;o__Bacteroidales;f__Rikenellaceae;g__Rikenellaceae_RC9_gut_group;s__
OTU_333	7.63388e-05	0	0.00064888	0.000534372	3.81694e-05	0.000954235	0.000152678	0	0	0	0	0	0.000190847	0.000305355	0.000114508	0.000496202	0.000419863	0	0.000152678	3.81694e-05	k__Bacteria;p__unidentified_Bacteria;c__Desulfovibrionia;o__Desulfovibrionales;f__Desulfovibrionaceae;g__;s__
OTU_334	0	0	7.63388e-05	0	0	0.000725219	0	0	0	0	0	0	0.000801557	0	0	0	0.000992404	0	0	0	k__Bacteria;p__Bacteroidota;c__Bacteroidia;o__Bacteroidales;f__Marinifilaceae;g__Odoribacter;s__
OTU_335	0	0	0	0	0	0	0	0	0	0	0	0	0	0	0	0	0	0	0	0	k__Bacteria;p__Proteobacteria;c__Gammaproteobacteria;o__Xanthomonadales;f__Rhodanobacteraceae;g__Chujaibacter;s__
OTU_336	0.000152678	0	0.000419863	7.63388e-05	0.000152678	0.000839727	0.000687049	0.000190847	0	0	0	0	0.000687049	0.000305355	0.000419863	0	0.00152678	0	0	0.00916065	k__Bacteria;p__Firmicutes;c__Clostridia;o__Lachnospirales;f__Lachnospiraceae;g__Lachnospiraceae_UCG-001;s__
OTU_337	0	0	0	0	0	0	0	0	0	0	0	0	0	0	0	0	0	0	0	0	k__Bacteria;p__Firmicutes;c__Bacilli;o__Bacillales;f__Bacillaceae;g__Pseudogracilibacillus;s__Pseudogracilibacillus_auburnensis
OTU_338	0	0	0	0	0	0	0	0	0	0	0	0	0	0	0	0	0	0	0	0	k__Bacteria
OTU_339	0	0	0	0	0	0	0	0	0	0	0	0	0	0	0	0	0.00198481	0	0	0	k__Bacteria;p__Firmicutes;c__Clostridia;o__Lachnospirales;f__Lachnospiraceae;g__Fusicatenibacter;s__
OTU_340	0	7.63388e-05	3.81694e-05	0	0	7.63388e-05	7.63388e-05	0	0	0	0	0	0.000687049	0	3.81694e-05	3.81694e-05	0.000534372	0	0.000190847	0.000190847	k__Bacteria;p__Firmicutes;c__Clostridia;o__Lachnospirales;f__Lachnospiraceae;g__GCA-900066575;s__
OTU_341	0.000114508	0.000190847	0.000152678	0.000687049	0.000381694	0.000267186	0.000190847	0	0	0	0	0	0.000725219	0.000267186	0.000267186	0.000152678	0.000229016	0.000152678	0	0.000496202	k__Bacteria;p__Firmicutes;c__Clostridia;o__unidentified_Clostridia;f__Ruminococcaceae;g__;s__
OTU_342	0.0013741	0.00167945	7.63388e-05	0.000687049	0	0.000419863	0.000572541	0.000152678	0	0	0	0	0.000381694	0.000534372	0.00061071	0.000229016	0.000305355	3.81694e-05	0.000305355	0.000267186	k__Bacteria;p__Firmicutes;c__Clostridia;o__Lachnospirales;f__Lachnospiraceae;g__GCA-900066575;s__
OTU_343	0	0	0	0	0	0	0	0	0	0	0	0	0	0	0	0	0	0	0	0	k__Bacteria;p__unidentified_Bacteria;c__unidentified_Bacteria;o__Gemmatimonadales;f__Gemmatimonadaceae;g__unidentified_Gemmatimonadaceae;s__Gemmatimonas_sp_WX54
OTU_344	0	0	0	0	0	0	0	0	0	0	0	0	0	0	0	0	0	0	0	0	k__Bacteria;p__Firmicutes;c__Clostridia;o__Christensenellales;f__Christensenellaceae;g__Christensenellaceae_R-7_group
OTU_345	0	0	0	0	0	0	0.000190847	0	0	0	0	0	0	0	0.000152678	0.000343525	0	0	0.000114508	0	k__Bacteria;p__Firmicutes;c__Bacilli;o__Lactobacillales;f__Aerococcaceae;g__Facklamia;s__Facklamia_tabacinasalis
OTU_346	0	0	0	0	0	0	0.000152678	0.000114508	7.63388e-05	0	0	0	0	0	0	3.81694e-05	0	0	0	0	k__Bacteria;p__Firmicutes;c__Bacilli;o__Lactobacillales;f__Carnobacteriaceae;g__Atopostipes;s__
OTU_347	0	0	0	0	0	0	0	3.81694e-05	0.000114508	3.81694e-05	0.000190847	0	0.000152678	0	0	0	0	0	0	0	k__Bacteria;p__unidentified_Bacteria;c__unidentified_Bacteria;o__Gemmatimonadales;f__Gemmatimonadaceae;g__unidentified_Gemmatimonadaceae;s__Gemmatimonadetes_bacterium_LP81
OTU_348	0	0	0	0	0	0	0	0	0	0	0	0	0	0	0	0	0	0	0	0	k__Bacteria;p__Bacteroidota;c__Bacteroidia;o__Bacteroidales;f__Prevotellaceae;g__Prevotella;s__
OTU_349	0	0	0	0	0	0	0	0.000190847	0.000687049	0.000305355	0.000572541	0.000152678	0	0	0	0	0	0	0	0.00064888	k__Bacteria;p__Actinobacteriota;c__Actinobacteria;o__Micrococcales;f__Micrococcaceae
OTU_350	0	0	0	0.000114508	0.000114508	0	0	0	0	0	0	0.000267186	0	0	0	0	0	7.63388e-05	0	0.000267186	k__Bacteria;p__Firmicutes;c__Clostridia;o__Oscillospirales;f__Oscillospiraceae;g__UCG-002;s__
OTU_351	0	0	0.00145044	0	0	0.000152678	7.63388e-05	0	0	0	0	0	0.000190847	0	7.63388e-05	0	3.81694e-05	0	3.81694e-05	0	k__Bacteria;p__Firmicutes;c__Clostridia;o__Oscillospirales
OTU_352	0.000114508	0	0	0.000496202	0.000190847	0	7.63388e-05	0	0	0	0	0.000114508	0	3.81694e-05	0	0	0.00145044	0.000190847	3.81694e-05	0.000305355	k__Bacteria;p__Bacteroidota;c__Bacteroidia;o__Bacteroidales;f__Tannerellaceae;g__Parabacteroides;s__Parabacteroides_merdae
OTU_353	0.00064888	0.00114508	0.000114508	0.00156495	0.000152678	7.63388e-05	0.000114508	0	0	0	0	0.000152678	3.81694e-05	7.63388e-05	0.000114508	0.000190847	7.63388e-05	7.63388e-05	3.81694e-05	0.000419863	k__Bacteria;p__Firmicutes;c__Clostridia;o__Lachnospirales;f__Lachnospiraceae
OTU_354	0	0	0	0	0	3.81694e-05	0	0	0	0	0	0	3.81694e-05	0.000114508	0	0	7.63388e-05	0	0	0	k__Bacteria;p__Proteobacteria;c__Gammaproteobacteria;o__Pasteurellales;f__Pasteurellaceae;g__Rodentibacter;s__Pasteurellaceae_bacterium
OTU_355	0	0	0	0	0	0	0	0.000229016	7.63388e-05	0.000152678	0.000229016	3.81694e-05	0	0	0	0	0	0	0	0	k__Bacteria;p__Acidobacteriota;c__Blastocatellia;o__Pyrinomonadales;f__Pyrinomonadaceae;g__RB41;s__
OTU_356	0	0	0.000152678	0	0	0	0	0	0	0	3.81694e-05	7.63388e-05	3.81694e-05	0	0	0	0	0	0	7.63388e-05	k__Bacteria;p__Proteobacteria;c__Alphaproteobacteria;o__Rhizobiales;f__Xanthobacteraceae;g__Bradyrhizobium;s__Bradyrhizobium_elkanii
OTU_357	0	0	7.63388e-05	3.81694e-05	0.000114508	7.63388e-05	7.63388e-05	0	0	0	0	0	3.81694e-05	0.000152678	0.000114508	0	0.000343525	3.81694e-05	0.000114508	7.63388e-05	k__Bacteria;p__Firmicutes;c__Clostridia;o__Oscillospirales;f__UCG-010;g__;s__
OTU_358	0	3.81694e-05	0.000190847	0.000763388	0	0.00206115	7.63388e-05	0	0	0	0	0	0.000190847	0.000114508	0.000114508	7.63388e-05	0.000267186	0	3.81694e-05	0	k__Bacteria;p__unidentified_Bacteria;c__Clostridia;o__Lachnospirales;f__Lachnospiraceae;g__unidentified_Lachnospiraceae;s__Clostridium_sp_Culture-27
OTU_359	7.63388e-05	0.000801557	0	0	0	0	0.000343525	0.000267186	0	0	0	0	0	0.000305355	0.000190847	0.000267186	0	0	0.000114508	0	k__Bacteria;p__Firmicutes;c__Bacilli;o__Lactobacillales;f__Lactobacillaceae;g__Lactobacillus;s__
OTU_360	0	0	0	0	0	0	0	0	0	0	0	0	0	0	0	0	0.00992404	0	0	0	k__Bacteria;p__Bacteroidota;c__Bacteroidia;o__Bacteroidales;f__Bacteroidaceae;g__Bacteroides;s__Bacteroides_massiliensis
OTU_361	0.000534372	0.000687049	0.000190847	0.000839727	7.63388e-05	0.000190847	3.81694e-05	0	3.81694e-05	0	0	7.63388e-05	0.000419863	0.000381694	0.000877896	0.000152678	0.000152678	3.81694e-05	7.63388e-05	0.000152678	k__Bacteria;p__unidentified_Bacteria;c__Clostridia;o__Lachnospirales;f__Lachnospiraceae;g__unidentified_Lachnospiraceae;s__Clostridium_sp_Culture-54
OTU_362	0	0	0	0	0	0	0	0	0	0	0	0	0	0	0	0	0	0	0	0	k__Bacteria;p__Bacteroidota;c__Bacteroidia;o__Sphingobacteriales;f__NS11-12_marine_group;g__;s__
OTU_363	0	0	0	0	0	0	0	0	0	0	0	0	0	0	0	0	0	0	0	0	k__Bacteria;p__Bacteroidota;c__Bacteroidia;o__Flavobacteriales;f__Weeksellaceae;g__Bergeyella;s__
OTU_364	0	0	0	0.000381694	0.000687049	0	0	0	0	0	0	0.000229016	0	0	0	0	0	0.000114508	0	0.000496202	k__Bacteria;p__Firmicutes;c__Clostridia;o__Oscillospirales;f__[Eubacterium]_coprostanoligenes_group;g__;s__
OTU_365	0.000190847	7.63388e-05	0.000114508	3.81694e-05	0	0.000343525	0.000152678	0	3.81694e-05	0	0	0	0.000190847	7.63388e-05	7.63388e-05	3.81694e-05	7.63388e-05	0	0.000229016	0	k__Bacteria;p__Firmicutes;c__Clostridia;o__Clostridia_UCG-014;f__;g__;s__
OTU_366	0.000114508	0.000801557	0	0	0	0	0.000229016	0	0	0	0	7.63388e-05	0.000839727	3.81694e-05	7.63388e-05	0	7.63388e-05	0	0	3.81694e-05	k__Bacteria;p__Firmicutes;c__Clostridia;o__Lachnospirales;f__Lachnospiraceae;g__Lachnospiraceae_NK4A136_group;s__
OTU_367	0.000114508	0.000190847	0.000190847	0.000229016	0	3.81694e-05	3.81694e-05	0	0	0	0	0	3.81694e-05	3.81694e-05	0.000114508	0.000152678	0.000229016	0	0.000152678	0	k__Bacteria;p__Bacteroidota;c__Bacteroidia;o__Bacteroidales;f__Rikenellaceae;g__Alistipes
OTU_368	0	0	0	0	0	0	0	0	0	0	0	7.63388e-05	0	0	0	0	0	0.000114508	0	0	k__Bacteria;p__Firmicutes;c__Clostridia;o__Peptostreptococcales-Tissierellales;f__Anaerovoracaceae;g__Family_XIII_AD3011_group;s__
OTU_369	0	0	0.000152678	0	0	0.000496202	0	0	0	0	0	0	0.000381694	0	0	0	0.000419863	3.81694e-05	0	0	k__Bacteria;p__unidentified_Bacteria;c__Clostridia;o__Lachnospirales;f__Lachnospiraceae;g__;s__
OTU_370	0	0	0	0	0	0	0	0	0	0	0	0	0	0	0	0	0	0	0	0	k__Bacteria
OTU_371	0	0	0	0	0	0	0	0	0	0	0	0	0	0	0	0	3.81694e-05	0	0	0	k__Bacteria;p__Bacteroidota;c__Bacteroidia;o__Bacteroidales;f__Rikenellaceae;g__Alistipes;s__Alistipes_indistinctus
OTU_372	0	0	0	0	0	0	0	0	0	0	0	7.63388e-05	0	0	0	0	0.000229016	0	0	7.63388e-05	k__Bacteria;p__Firmicutes;c__Clostridia;o__Oscillospirales;f__Oscillospiraceae;g__UCG-002;s__
OTU_373	0	0	0	0	0	0	0	0	0	0	0	0.000114508	0	0	0	0	0	0.000267186	0	0	k__Bacteria;p__Firmicutes;c__Clostridia;o__Lachnospirales;f__Lachnospiraceae;g__Lachnospiraceae_XPB1014_group;s__
OTU_374	0	0	0	0	0	0	0	0	0	0	0	0	0	0	0	0	0	0	0	0	k__Bacteria;p__Bacteroidota;c__Bacteroidia;o__Bacteroidales;f__Prevotellaceae;g__Prevotella;s__
OTU_375	0	0	0	0	0	0	0	0	0	0	0	0	0	0	0	0	0	0	0	0	k__Bacteria;p__unidentified_Bacteria;c__Acidobacteriae;o__Acidobacteriales;f__;g__;s__
OTU_376	7.63388e-05	0	0.000114508	0.000229016	7.63388e-05	0.000152678	0.000152678	0	0	0	0	0	0.000267186	3.81694e-05	0	0.000114508	0.000343525	0	0	3.81694e-05	k__Bacteria;p__unidentified_Bacteria;c__Clostridia;o__Christensenellales;f__Christensenellaceae;g__;s__
OTU_377	0	0	0	0	0	0.000114508	0	0.000229016	0.000114508	0.000152678	0.000229016	0	7.63388e-05	0	0	0	0	0	0	0	k__Bacteria;p__Proteobacteria;c__Alphaproteobacteria;o__Dongiales;f__Dongiaceae;g__Dongia;s__
OTU_378	0.000152678	7.63388e-05	0.000381694	0.000190847	0	0.000190847	0.000190847	0	0	0	0	0	0	0.000114508	0	3.81694e-05	0.000496202	0	0.000267186	0	k__Bacteria;p__Bacteroidota;c__Bacteroidia;o__Bacteroidales;f__Muribaculaceae;g__;s__
OTU_379	0	3.81694e-05	0.000801557	0	0	0.00064888	0	0	0	0	0	0	0.00125959	0	0	0	0.00061071	0	0	0	k__Bacteria;p__Proteobacteria;c__Gammaproteobacteria;o__Enterobacterales;f__Morganellaceae;g__Proteus;s__Proteus_vulgaris
OTU_380	0	0	0.000343525	0	0.000229016	0.000381694	0	0	0	0	0	0.000114508	0.00213749	7.63388e-05	0	3.81694e-05	0.0013741	7.63388e-05	7.63388e-05	0	k__Bacteria;p__Firmicutes;c__Clostridia;o__Oscillospirales;f__[Eubacterium]_coprostanoligenes_group;g__;s__
OTU_381	0	0	0	0	0	0	0	0	0	0	0	0	0	0	0	0	0	0	0	0	k__Bacteria;p__Proteobacteria;c__Gammaproteobacteria;o__Xanthomonadales;f__Rhodanobacteraceae;g__Rhodanobacter;s__
OTU_382	0	0	0	0	0	0	0	0.000114508	0.000114508	0.000152678	3.81694e-05	0	0	0	0	0	0	0	0	3.81694e-05	k__Bacteria;p__unidentified_Bacteria;c__Acidimicrobiia;o__Actinomarinales;f__;g__;s__
OTU_383	0	0	0	0	0	7.63388e-05	0	0	0.000763388	0	0	0	0.000305355	0	0	0	3.81694e-05	0	0	0	k__Bacteria;p__Firmicutes;c__Bacilli;o__Lactobacillales;f__Lactobacillaceae;g__Lactobacillus;s__Lactobacillus_rhamnosus
OTU_384	0	0	0	0	0	0	0	0	0	0	0	0	0	0	0	0	0	0	0	0	k__Bacteria;p__Firmicutes;c__Clostridia;o__Peptococcales;f__Peptococcaceae;g__Peptococcus
OTU_385	0	0	0	7.63388e-05	0.000114508	0	0	0	0	0	0	7.63388e-05	0	0	0	0	0	0.000114508	0	0.00133593	k__Bacteria;p__Chloroflexi;c__Anaerolineae;o__SBR1031;f__;g__;s__
OTU_386	3.81694e-05	0	0	0	0	0	0	0	0	0	0	0	0	0.000801557	0.000305355	0	0	0	0.000267186	0	k__Bacteria;p__Firmicutes;c__Clostridia;o__Lachnospirales;f__Lachnospiraceae;g__Roseburia;s__
OTU_387	7.63388e-05	0.000114508	0.000190847	7.63388e-05	0.000229016	0.000229016	0.000229016	0	0	0	0	7.63388e-05	0.000152678	0.000229016	7.63388e-05	0.000190847	0.000305355	0.000190847	0.000114508	7.63388e-05	k__Bacteria
OTU_388	0	0	0	0	3.81694e-05	0	0	0	0.000839727	0	0	0	0	0	0	0	0	0	0	0	k__Bacteria;p__Firmicutes;c__Negativicutes;o__Veillonellales-Selenomonadales;f__Veillonellaceae;g__Megasphaera;s__Megasphaera_micronuciformis
OTU_389	7.63388e-05	0	7.63388e-05	0.00328257	3.81694e-05	3.81694e-05	0	0	0	0	0	0	3.81694e-05	0.000114508	3.81694e-05	0	0.000190847	0	0	3.81694e-05	k__Bacteria;p__Firmicutes;c__Bacilli;o__RF39;f__;g__;s__
OTU_390	0	0	0	0	0	0	0	0	0	0	0	0.000267186	0	0	0	0	0	0	0	0	k__Bacteria;p__Firmicutes;c__Negativicutes;o__Acidaminococcales;f__Acidaminococcaceae;g__Phascolarctobacterium;s__Phascolarctobacterium_faecium
OTU_391	0	0	0	3.81694e-05	0.000114508	0	0	3.81694e-05	0	7.63388e-05	0	0.000114508	7.63388e-05	0	0	0	0	0	0	0	k__Bacteria;p__Proteobacteria;c__Alphaproteobacteria;o__Caulobacterales;f__Caulobacteraceae;g__Phenylobacterium;s__
OTU_392	0	0	0	0	0	0.000419863	0	0	0	0	0	0	7.63388e-05	0	0	0	0	0	0	0	k__Bacteria;p__unidentified_Bacteria;c__unidentified_Bacteria;o__Gemmatimonadales;f__Gemmatimonadaceae;g__;s__
OTU_393	0.000381694	0	3.81694e-05	0.00335891	0.000152678	0.00156495	0.000190847	0	0	0	0	0	0.000229016	0.000152678	0	0	0.000229016	0	7.63388e-05	0	k__Bacteria;p__Firmicutes;c__Clostridia;o__Clostridia_UCG-014;f__;g__;s__
OTU_394	0	0	0	0.000916065	0.000801557	0	0	0	0	0	0	0.00290087	0	0	0	0	0	0.00248101	0	0.000725219	k__Bacteria;p__Bacteroidota;c__Bacteroidia;o__Bacteroidales;f__Muribaculaceae;g__;s__
OTU_395	0	0	0	0	3.81694e-05	0	3.81694e-05	0	0	0	0	0.00148861	0	0	0	0	0.00122142	0	0	0	k__Bacteria;p__Bacteroidota;c__Bacteroidia;o__Bacteroidales;f__Bacteroidaceae;g__Bacteroides;s__Bacteroides_fragilis
OTU_396	0	0	0	0	0	0	0	0	0	0	0	7.63388e-05	0	0	0	0	0	3.81694e-05	0	0	k__Bacteria;p__Firmicutes;c__Clostridia;o__Christensenellales;f__Christensenellaceae;g__Christensenellaceae_R-7_group
OTU_397	0.000343525	0.000190847	7.63388e-05	0.000381694	0.000114508	0.000190847	0.000725219	0	0	0	0	0	0.000267186	0.000267186	0.000114508	0.000114508	0.000152678	0	0.000114508	0.00061071	k__Bacteria;p__unidentified_Bacteria;c__Clostridia;o__Lachnospirales;f__Lachnospiraceae;g__;s__
OTU_398	0	0	0	0	0	0	0	0	0	0	0	0	0	0	0	0	0	3.81694e-05	0	0.000763388	k__Bacteria;p__Actinobacteriota;c__Actinobacteria;o__Bifidobacteriales;f__Bifidobacteriaceae;g__Bifidobacterium
OTU_399	3.81694e-05	0	0	0	0	0	7.63388e-05	0	0	0	0	0	0	0.000190847	0	0.000114508	0	0	0	0	k__Bacteria;p__unidentified_Bacteria;c__Alphaproteobacteria;o__Rhodospirillales;f__unidentified_Rhodospirillales;g__unidentified_Rhodospirillales;s__Azospirillum_sp_47_25
OTU_400	0	0	0	0	0	0	0	0	0	3.81694e-05	0	0	0	0	0	0	0	0	0	0	k__Bacteria;p__Proteobacteria;c__Gammaproteobacteria;o__Pseudomonadales;f__Moraxellaceae;g__Acinetobacter;s__Acinetobacter_junii
OTU_401	0	0	0	0	0	0	0	0	0	0	0	0	0	0	0	0	0	0	0	0	k__Bacteria;p__Actinobacteriota;c__Actinobacteria;o__Corynebacteriales;f__Corynebacteriaceae;g__Corynebacterium;s__Corynebacterium_riegelii
OTU_402	0	0	0	0	0	0	0	0	0	0	0	0	0	0	0	0	0	0	0	0	k__Bacteria;p__Actinobacteriota;c__Actinobacteria;o__Propionibacteriales;f__Propionibacteriaceae;g__Microlunatus;s__
OTU_403	0	0	0	0	0	0	0	0	0	0	0	0	0	0	0	0	0	0	0	0	k__Bacteria;p__Actinobacteriota;c__Actinobacteria
OTU_404	0	0	0	0	0.000114508	0	0	0	0	0	0	0	0	0	0	0	0	0	0	0	k__Bacteria;p__Bacteroidota;c__Bacteroidia;o__Flavobacteriales;f__Flavobacteriaceae;g__Capnocytophaga;s__Capnocytophaga_leadbetteri
OTU_405	0	0	0	0	0	0	0	0	0	0	0	0	0	0	0	0	0	0	0	0.000839727	k__Bacteria;p__unidentified_Bacteria;c__Syntrophobacteria;o__Syntrophobacterales;f__;g__;s__
OTU_406	0	0	0	0	0	0	0	0	0	0	0	0	0	3.81694e-05	0	7.63388e-05	0	0	0	0	k__Bacteria;p__Firmicutes;c__Clostridia;o__Clostridia_UCG-014;f__;g__;s__
OTU_407	0	0	0	0.000114508	0.000114508	3.81694e-05	0	0	0	0	0	0.000381694	0	0	7.63388e-05	0	0.000419863	7.63388e-05	0	3.81694e-05	k__Bacteria;p__Actinobacteriota;c__Coriobacteriia;o__Coriobacteriales;f__Coriobacteriaceae;g__Collinsella;s__
OTU_408	0	0	0	0	0	0	0	0	0	0	0	0	0	0	0	0	0	0	0	0	k__Bacteria;p__unidentified_Bacteria;c__Alphaproteobacteria;o__Elsterales;f__;g__;s__
OTU_409	0	0	0	0	0	0	0	0	0	0	0	0	0	0	0	0	0	0	0	0	k__Bacteria;p__Proteobacteria;c__Gammaproteobacteria;o__Alteromonadales;f__Shewanellaceae;g__Shewanella;s__Shewanella_sp_FDAARGOS_354
OTU_410	0.000534372	0.000496202	0.000190847	0.000381694	7.63388e-05	0.000190847	0.000190847	0	0	0	0	0	0.000152678	3.81694e-05	0.000114508	3.81694e-05	0.000114508	0	0.000190847	0	k__Bacteria;p__Bacteroidota;c__Bacteroidia;o__Bacteroidales;f__Rikenellaceae;g__Alistipes;s__
OTU_411	0	0	3.81694e-05	0	3.81694e-05	7.63388e-05	0	0	0	0	0	0	0.000114508	0	0	0	0.000152678	0	0	0	k__Bacteria;p__Firmicutes;c__Clostridia;o__Oscillospirales;f__Ruminococcaceae;g__Candidatus_Soleaferrea;s__Ruminococcaceae_bacterium_GD6
OTU_412	3.81694e-05	7.63388e-05	0.000114508	0.00061071	0.000152678	3.81694e-05	3.81694e-05	7.63388e-05	0	3.81694e-05	3.81694e-05	0	3.81694e-05	7.63388e-05	0	0	0	0	7.63388e-05	0	k__Bacteria;p__Actinobacteriota;c__Coriobacteriia;o__Coriobacteriales;f__Eggerthellaceae
OTU_413	0	0	0	0	0	0	0	3.81694e-05	3.81694e-05	0.000114508	0.000152678	3.81694e-05	0	0	0	0	0	0	0	0	k__Bacteria;p__Proteobacteria;c__Alphaproteobacteria;o__Rhizobiales;f__KF-JG30-B3;g__;s__
OTU_414	0	0	0	0	0	0	0	0	0	0	0	0	0	0	0	0	0.000916065	0	0	3.81694e-05	k__Bacteria;p__Firmicutes;c__Bacilli;o__Erysipelotrichales;f__Erysipelatoclostridiaceae;g__Erysipelotrichaceae_UCG-003
OTU_415	0	0	0	0	0	0	0	3.81694e-05	3.81694e-05	3.81694e-05	0.000152678	0	0	0	0	0	0	0	0	0	k__Bacteria;p__Bacteroidota;c__Bacteroidia;o__Chitinophagales;f__Chitinophagaceae;g__Flavitalea;s__
OTU_416	0	0	0.000572541	3.81694e-05	0	0.000916065	7.63388e-05	0	0	0	0	0	0.000152678	0	0	0	0.000152678	0	0	0	k__Bacteria;p__Firmicutes;c__Clostridia;o__Oscillospirales;f__Ruminococcaceae;g__Harryflintia;s__
OTU_417	0	0	0	0	0.000152678	0	0	0	0	0	0	0	0	0	0	0	0	7.63388e-05	0	0.000114508	k__Bacteria;p__Actinobacteriota;c__Actinobacteria;o__Actinomycetales;f__Actinomycetaceae;g__Actinomyces;s__Actinomyces_graevenitzii
OTU_418	0.000267186	0.000190847	0.000114508	0.000152678	0.000496202	0.000419863	0.00064888	0.000114508	0	0	0	0	0.000152678	0.000763388	0.00064888	7.63388e-05	0.000114508	0.000305355	0.000305355	3.81694e-05	k__Bacteria;p__Firmicutes;c__Clostridia;o__Lachnospirales;f__Lachnospiraceae;g__ASF356;s__
OTU_419	0	0	0	0	0.000152678	0	0	0	0	0	0	0	0	0	0	0	0	0	0	0	k__Bacteria;p__Firmicutes;c__Negativicutes;o__Veillonellales-Selenomonadales;f__Selenomonadaceae;g__Selenomonas
OTU_420	0	0	0	0	0	0	0	0	0	0	0	0.000152678	0	0	0	0	0	0	0	0	k__Bacteria;p__Actinobacteriota;c__Actinobacteria;o__Kineosporiales;f__Kineosporiaceae;g__Angustibacter;s__
OTU_421	0	0	0	0	0	0.000114508	0	0	0	0	0	0	0.000114508	0	0	0	0	0	0	0.000152678	k__Bacteria;p__Proteobacteria;c__Gammaproteobacteria;o__Burkholderiales;f__Hydrogenophilaceae;g__Hydrogenophilus;s__Hydrogenophilus_thermoluteolus
OTU_422	0	0	0	0	7.63388e-05	0	0	0	0	0	0	3.81694e-05	0	0	0	0	0	0.000152678	0	0	k__Bacteria;p__Firmicutes;c__Clostridia;o__Oscillospirales;f__[Eubacterium]_coprostanoligenes_group;g__;s__
OTU_423	0.000343525	0	0.000954235	0	0	0.000152678	7.63388e-05	0	0	0	0	0	3.81694e-05	0	3.81694e-05	0	0.000152678	0	0	0	k__Bacteria;p__Bacteroidota;c__Bacteroidia;o__Bacteroidales;f__Muribaculaceae;g__;s__
OTU_424	0	0	3.81694e-05	0	0	0.000114508	3.81694e-05	0	0	0	0	0	3.81694e-05	7.63388e-05	3.81694e-05	0	0	0.00110691	0	0	k__Bacteria;p__Firmicutes;c__Bacilli;o__Erysipelotrichales;f__Erysipelotrichaceae
OTU_425	0	0	0	0	0	3.81694e-05	0	0	3.81694e-05	0	3.81694e-05	0	0.000496202	0	0	0	0	0	0	0	k__Bacteria;p__Proteobacteria;c__Gammaproteobacteria;o__Burkholderiales;f__TRA3-20;g__;s__
OTU_426	0	0	0	0	0	0	0	3.81694e-05	3.81694e-05	3.81694e-05	0	0	3.81694e-05	0	0	0	0	0	0	0	k__Bacteria;p__Proteobacteria;c__Gammaproteobacteria;o__Xanthomonadales;f__Xanthomonadaceae;g__Lysobacter
OTU_427	0	0	0	0	0.000114508	0	3.81694e-05	0	0	0	0	0	0	0	0	0	0.000572541	0	0	0	k__Bacteria;p__Firmicutes;c__Clostridia;o__Oscillospirales;f__Ruminococcaceae;g__Ruminococcus;s__Ruminococcus_sp_N15.MGS-57
OTU_428	0	0	0	0	0	0	0	0	0	0	0	0	0	0	0	0	0	3.81694e-05	0	3.81694e-05	k__Bacteria;p__Proteobacteria;c__Gammaproteobacteria;o__Oceanospirillales;f__Halomonadaceae;g__Halomonas
OTU_429	0	0	0	0	0	0	0	0	0	0	0	0	0	0	0	0	0	0	0	0.00221382	k__Bacteria;p__Bacteroidota;c__Bacteroidia;o__Bacteroidales;f__Marinilabiliaceae;g__Ruminofilibacter;s__
OTU_430	0	0	0	0	0	0	0	0	0	0	0	0	0	0	0	0	0	0	0	0	k__Bacteria;p__Firmicutes;c__Clostridia;o__Peptostreptococcales-Tissierellales;f__Anaerovoracaceae;g__Mogibacterium;s__Mogibacterium_pumilum
OTU_431	0	0	0	0	0	0	0	0	0	0	7.63388e-05	0	0	0	0	0	0	0	0	0	k__Bacteria;p__Acidobacteriota;c__Acidobacteriae;o__Bryobacterales;f__Bryobacteraceae;g__Bryobacter;s__
OTU_432	0	0	0	0	0.000419863	0	0	0	0	0	0	0.000152678	0	0	0	0	0	0.000419863	0	0	k__Bacteria;p__unidentified_Bacteria;c__Bacilli;o__Erysipelotrichales;f__Erysipelotrichaceae;g__;s__
OTU_433	0	0	7.63388e-05	0	0.00061071	0	0	7.63388e-05	0	7.63388e-05	0	0	0	0	0	0	3.81694e-05	0	0	0.000229016	k__Bacteria;p__unidentified_Bacteria;c__Clostridia;o__Lachnospirales;f__Lachnospiraceae;g__;s__
OTU_434	0	0	0	0	0	0	0	0	0	0	0	0	0	0	0	0	0	0	0	0	k__Bacteria;p__unidentified_Bacteria;c__Alphaproteobacteria;o__Micropepsales;f__Micropepsaceae;g__;s__
OTU_435	0	0	0	0	0	0	0	0	0	0	0	0	0	0	0	0	0	0	0	0	k__Bacteria;p__Proteobacteria;c__Gammaproteobacteria;o__Xanthomonadales;f__Rhodanobacteraceae;g__Mizugakiibacter;s__
OTU_436	0	0	0	0	3.81694e-05	0	0	0	0	0	0	0	0	0	0	0	0	0	0	0	k__Bacteria;p__Firmicutes;c__Clostridia;o__Clostridiales;f__Clostridiaceae;g__Sarcina;s__
OTU_437	0	0	0	0	0	0	0	0	0	0	0	0	0	0	0	0	0	0	0	0	k__Bacteria;p__Firmicutes;c__Clostridia;o__Lachnospirales;f__Lachnospiraceae;g__Butyrivibrio;s__Eubacterium_sp_oral_clone_GI038
OTU_438	0.000114508	0	0	7.63388e-05	3.81694e-05	0	0.000267186	0	0	0	0	0	0	0.000190847	7.63388e-05	0	0.000458033	0	0	0.000190847	k__Bacteria;p__Firmicutes;c__Clostridia;o__Monoglobales;f__Monoglobaceae;g__Monoglobus;s__
OTU_439	0	0	0	0	0	0	0	0	0	0	0	0	0	0	0	0	0	0	0	0	k__Bacteria;p__Proteobacteria;c__Gammaproteobacteria;o__Oceanospirillales;f__Halomonadaceae;g__Halomonas;s__Halomonas_sp_1513
OTU_440	0	0	0	0	0	0	0	0	0	3.81694e-05	0	0	0	0	0	0	0	0	0	0	k__Bacteria;p__Nitrospirota;c__Nitrospira;o__Nitrospirales;f__Nitrospiraceae;g__;s__
OTU_441	0	0	0	0	0	0	0	0	0	0	3.81694e-05	0	0	0	0	0	0	0	0	0	k__Bacteria;p__Actinobacteriota;c__Actinobacteria;o__Corynebacteriales;f__Corynebacteriaceae;g__Corynebacterium;s__Corynebacterium_xerosis
OTU_442	0	0	0	0	0	0	0	0	0	0	0	0	0	0	0	0	0	0	0	0	k__Bacteria;p__unidentified_Bacteria;c__Bacteroidia;o__Chitinophagales;f__Chitinophagaceae;g__;s__
OTU_443	0	0	0	0	0	0	0	0	0	0	0	0	0	0	0	0	0	0	0	0	k__Bacteria;p__Actinobacteriota;c__Actinobacteria;o__Micrococcales;f__Microbacteriaceae;g__Pseudoclavibacter;s__Pseudoclavibacter_sp_CFCC_11306
OTU_444	0	0	0	0.000343525	0	0	0.000839727	0	0	0	0	0	0	3.81694e-05	0.000190847	0	0	0	0	0	k__Bacteria;p__Firmicutes;c__Clostridia;o__Clostridia_vadinBB60_group;f__;g__;s__
OTU_445	0	0	0	0	0	0	0	0	0	0	0	0	0	0	0	0	0	0	0	0	k__Bacteria;p__Firmicutes;c__Bacilli;o__Mycoplasmatales;f__Mycoplasmataceae;g__Mycoplasma;s__Metamycoplasma_hyosynoviae
OTU_446	0.000152678	0.000190847	0.000152678	0.000992404	3.81694e-05	0.000190847	0.000114508	0	0	0	0	0	0.000152678	0.000152678	3.81694e-05	0	0.000190847	0	0.000114508	0	k__Bacteria;p__Firmicutes;c__Clostridia;o__Oscillospirales;f__Butyricicoccaceae;g__UCG-009
OTU_447	0	0	0	0	0	0	0	0	0	0	0	0	0	0	0	0	0	0	0	0	k__Bacteria
OTU_448	0	0	0	0	0	0	0	0.000114508	0.000114508	0.000343525	0.000343525	0.000114508	0.000190847	0	0	0	0	0	0	0	k__Bacteria;p__unidentified_Bacteria;c__unidentified_Bacteria;o__Gemmatimonadales;f__Gemmatimonadaceae;g__;s__
OTU_449	0	0	0.000152678	3.81694e-05	0	3.81694e-05	3.81694e-05	0	0	0	0	0	0	0.000114508	3.81694e-05	0	0	0	0	0	k__Bacteria;p__Desulfobacterota;c__Desulfovibrionia;o__Desulfovibrionales;f__Desulfovibrionaceae;g__Desulfovibrio
OTU_450	7.63388e-05	0.000152678	0.000267186	0.000687049	0	0.000114508	0.000114508	0	0	0	0	0	0.000152678	7.63388e-05	7.63388e-05	3.81694e-05	7.63388e-05	3.81694e-05	0	0.000152678	k__Bacteria;p__Firmicutes;c__Clostridia;o__Peptostreptococcales-Tissierellales;f__Anaerovoracaceae;g__Family_XIII_UCG-001;s__
OTU_451	0	0	0	0	0	0	7.63388e-05	0	0	0	0	0	0	0	0	0	3.81694e-05	0	0	0	k__Bacteria;p__Firmicutes;c__Clostridia;o__Peptostreptococcales-Tissierellales;f__Anaerovoracaceae
OTU_452	0	0	0	0	0	0	0	0	0	0	0	0	0	0	0	3.81694e-05	0	0	0	0	k__Bacteria;p__unidentified_Bacteria;c__Saccharimonadia;o__Saccharimonadales;f__unidentified_Saccharimonadales;g__unidentified_Saccharimonadales;s__TM7_phylum_sp_oral_clone_FR058
OTU_453	0	0	7.63388e-05	0	7.63388e-05	0	0	0	0	0	0	0	0	0	0	0	0.000992404	0	0	0	k__Bacteria;p__Firmicutes;c__Clostridia;o__Oscillospirales;f__Ruminococcaceae;g__Subdoligranulum;s__
OTU_454	0.000152678	3.81694e-05	3.81694e-05	0.000190847	0	0	0	0	0	0	0	0	0	0	7.63388e-05	0	7.63388e-05	0.000114508	0	0	k__Bacteria;p__unidentified_Bacteria;c__Clostridia;o__Oscillospirales;f__Ruminococcaceae;g__;s__
OTU_455	0	0	0.000114508	0.000343525	0	3.81694e-05	3.81694e-05	0	0	0	0	0	7.63388e-05	0	0	7.63388e-05	0.000152678	0	0.000190847	3.81694e-05	k__Bacteria
OTU_456	3.81694e-05	3.81694e-05	0.000114508	0.000152678	0	0.000419863	0	0	0	0	0	3.81694e-05	0.000190847	7.63388e-05	7.63388e-05	0	0.000190847	0	7.63388e-05	0.000152678	k__Bacteria;p__Firmicutes;c__Clostridia;o__Lachnospirales;f__Lachnospiraceae;g__Acetatifactor;s__
OTU_457	0	0	0	0	0	0	0	0	7.63388e-05	0	0	0.000152678	0	0	0	0	0	0	0	0	k__Bacteria;p__Proteobacteria;c__Alphaproteobacteria;o__Azospirillales;f__Azospirillaceae;g__Skermanella;s__
OTU_458	0	3.81694e-05	7.63388e-05	7.63388e-05	3.81694e-05	0.000190847	0.000114508	0	0	0	0	0	7.63388e-05	0	0.000114508	0.000267186	7.63388e-05	3.81694e-05	3.81694e-05	0	k__Bacteria;p__unidentified_Bacteria;c__Clostridia;o__Lachnospirales;f__Lachnospiraceae;g__;s__
OTU_459	7.63388e-05	0	0	0.000305355	0.000267186	0	0	0	0	0	0	0	3.81694e-05	0	0	0	7.63388e-05	3.81694e-05	3.81694e-05	0	k__Bacteria
OTU_460	0	0	0	0	0	0	0	0	0	0	0	0	0	0	0	0	0	0	0	0	k__Bacteria
OTU_461	0	0	0	0	0	0	0	0	0	0	0	0	0	0	0	0	0	0	0	0	k__Bacteria;p__Proteobacteria;c__Gammaproteobacteria;o__Xanthomonadales;f__Xanthomonadaceae;g__Luteimonas;s__Luteimonas_sp_100111
OTU_462	0.000114508	0.000114508	0	3.81694e-05	0	0	0	0	0	0	0	0	3.81694e-05	0.000114508	7.63388e-05	0.000114508	0.000190847	0	7.63388e-05	0	k__Bacteria;p__unidentified_Bacteria;c__Bacilli;o__Erysipelotrichales;f__Erysipelotrichaceae;g__;s__
OTU_463	0.000343525	0.000267186	0.00225199	0	3.81694e-05	0.000419863	0	0	0	0	0	0	0.000419863	0.000305355	0.000305355	0.000190847	0.000954235	0	0.000458033	0	k__Bacteria;p__Firmicutes;c__Clostridia;o__Lachnospirales;f__Lachnospiraceae;g__Lachnospiraceae_NK4A136_group;s__
OTU_464	0	0	0	0	0	0	0	0	0	0	0	0	0	0	0	0	0	0	0	0	k__Bacteria;p__Gracilibacteria;c__unidentified_Gracilibacteria;o__Absconditabacteriales_(SR1);f__unidentified_Absconditabacteriales_(SR1);g__unidentified_Absconditabacteriales_(SR1);s__SR1_bacterium_oral_taxon_875
OTU_465	0	0	0	0	0	3.81694e-05	0	0	0	0	3.81694e-05	0	0	7.63388e-05	0	0	0.000572541	0	0	0	k__Bacteria;p__Firmicutes;c__Bacilli;o__Lactobacillales;f__Leuconostocaceae;g__Weissella;s__Weissella_cibaria
OTU_466	7.63388e-05	0	0	3.81694e-05	0	7.63388e-05	0	0	0	0	0	0	3.81694e-05	0	0	0	3.81694e-05	7.63388e-05	7.63388e-05	3.81694e-05	k__Bacteria;p__Firmicutes;c__Clostridia;o__Oscillospirales;f__Ruminococcaceae;g__Negativibacillus;s__
OTU_467	0.000152678	0	3.81694e-05	0	0	0.00122142	3.81694e-05	0	0	0	0	0	7.63388e-05	3.81694e-05	0	0	3.81694e-05	0	3.81694e-05	0	k__Bacteria;p__Firmicutes;c__Clostridia;o__Lachnospirales;f__Lachnospiraceae;g__[Eubacterium]_xylanophilum_group;s__
OTU_468	0	0	0	0	0	0	0	0	0	0	0	0	0	0	0	0	0	0	0	0	k__Bacteria;p__Firmicutes
OTU_469	0	0	0	0	0	0	0	0	0	0	0	0	0	0	0	0	0	0	0	7.63388e-05	k__Bacteria;p__unidentified_Bacteria;c__Acidobacteriae;o__Acidobacteriales;f__;g__;s__
OTU_470	0	0	0	0	3.81694e-05	0	3.81694e-05	0	0	0	0	0	0	0	0	0	7.63388e-05	0	0	0	k__Bacteria;p__Firmicutes;c__Bacilli;o__Lactobacillales;f__Aerococcaceae;g__Aerococcus;s__Aerococcus_urinaeequi
OTU_471	0	0	0	0	0.000152678	0	0	0	0	0	0	0	0	0	0	0	0	0	0	3.81694e-05	k__Bacteria;p__Bacteroidota;c__Bacteroidia;o__Bacteroidales;f__Prevotellaceae;g__Prevotella;s__Prevotella_sp_oral_clone_P4PB_83_P2
OTU_472	0	0	0	0	0	0	0	0	0	0	0	0	0	0	0	0	0	0	0	0	k__Bacteria;p__Bacteroidota;c__Bacteroidia;o__Flavobacteriales;f__Flavobacteriaceae;g__Capnocytophaga;s__Capnocytophaga_sputigena
OTU_473	0	0	0	0	0	0	0	0	0	0	0	0	0	0	0	0	0	0	0	7.63388e-05	k__Bacteria;p__Bacteroidota;c__Bacteroidia;o__Bacteroidales;f__Prevotellaceae;g__Alloprevotella;s__Prevotellaceae_bacterium_Marseille-P2826
OTU_474	0	0	0	0	0	0	0	0	0	0	0	0	0	0	0	0	0	0	0	0	k__Bacteria;p__Actinobacteriota;c__Actinobacteria;o__Corynebacteriales;f__Corynebacteriaceae;g__Corynebacterium
OTU_475	0	0	3.81694e-05	0.000305355	0.000419863	3.81694e-05	0	7.63388e-05	0	0	0	0	0	0	0	3.81694e-05	0	0	0	7.63388e-05	k__Bacteria;p__Firmicutes;c__Clostridia;o__Peptostreptococcales-Tissierellales;f__Anaerovoracaceae;g__[Eubacterium]_brachy_group;s__
OTU_476	3.81694e-05	3.81694e-05	0.000229016	0.000343525	0.000992404	0.000152678	0.000114508	0	0	0	0	0	0.000496202	7.63388e-05	0	0.000190847	0.000343525	7.63388e-05	0.000114508	0.000916065	k__Bacteria;p__unidentified_Bacteria;c__Clostridia;o__Lachnospirales;f__Lachnospiraceae;g__;s__
OTU_477	0	0	0	0.000190847	0.000114508	0	0	0	0	0	0	0	0	0	0	0	0.00248101	0	0	0.000114508	k__Bacteria;p__Bacteroidota;c__Bacteroidia;o__Bacteroidales;f__Bacteroidaceae;g__Bacteroides;s__Bacteroides_caccae
OTU_478	0	0	0	3.81694e-05	7.63388e-05	0	0	0	0	0	0	7.63388e-05	0	0	0	0	7.63388e-05	0	0	7.63388e-05	k__Bacteria;p__Firmicutes;c__Bacilli;o__Erysipelotrichales;f__Erysipelatoclostridiaceae;g__Erysipelatoclostridium;s__Erysipelatoclostridium_ramosum
OTU_479	0	0	0	0	0	0	0	0	0	0	0	0	0	0	0	0	0	0	0	0	k__Bacteria;p__Firmicutes;c__Negativicutes;o__Veillonellales-Selenomonadales;f__Veillonellaceae;g__Dialister;s__Dialister_pneumosintes
OTU_480	0	0	0	0	0	0	0	0	0	0	0	0	0	0	0	0	0	0	0	0	k__Bacteria
OTU_481	0	0	0	0	0	7.63388e-05	0	0	0	0	0	0.000496202	0.000114508	0	3.81694e-05	0	0.000152678	0	0	0	k__Bacteria;p__Firmicutes;c__Clostridia;o__Lachnospirales;f__Lachnospiraceae;g__Lachnospiraceae_NK4A136_group;s__
OTU_482	0	0	0	0	0	0	0	0	3.81694e-05	0	0	0	0	0	0	0	0	0	0	0	k__Bacteria;p__Actinobacteriota;c__Actinobacteria;o__Corynebacteriales;f__Corynebacteriaceae;g__Lawsonella
OTU_483	3.81694e-05	0	0.0279782	0.000343525	0.000229016	0.000343525	0	0	0	0	0	0.000152678	0.000267186	0	3.81694e-05	0	0.000496202	0.000305355	0	0.00064888	k__Bacteria;p__Proteobacteria;c__Gammaproteobacteria;o__Enterobacterales;f__Enterobacteriaceae;g__Raoultella;s__Raoultella_ornithinolytica
OTU_484	0	0	0	0	0	0	0	0	0	0	0	0	0	0	0	0	0	0	0	0	k__Bacteria;p__Proteobacteria;c__Gammaproteobacteria;o__Burkholderiales;f__Neisseriaceae;g__Neisseria;s__Neisseria_elongata
OTU_485	0.000496202	0.000343525	0	0	0	7.63388e-05	0	0	0	0	0	0	0.000114508	0	0.00110691	0	3.81694e-05	0	0	0	k__Bacteria;p__unidentified_Bacteria;c__Clostridia;o__Lachnospirales;f__Lachnospiraceae;g__;s__
OTU_486	0	0	0	0	0	0	0	0	0	0	0	0.000458033	0	0	0	0	0.00446582	0.000229016	0	0	k__Bacteria;p__Proteobacteria;c__Gammaproteobacteria;o__Burkholderiales;f__Sutterellaceae;g__Sutterella;s__
OTU_487	0	0	0	0.000114508	0	0	0	0	0	0	0	0.000458033	0	0	0	0	0.00061071	0.000152678	0	3.81694e-05	k__Bacteria;p__Desulfobacterota;c__Desulfovibrionia;o__Desulfovibrionales;f__Desulfovibrionaceae;g__Desulfovibrio;s__Desulfovibrio_piger
OTU_488	0	0	0	0	0	0	0	0	0	0	0	0	0	0	0	0	0	0	0	0	k__Bacteria;p__Proteobacteria;c__Gammaproteobacteria;o__Pseudomonadales;f__Moraxellaceae;g__Moraxella
OTU_489	0	0	0	0	0.000687049	0	0	0	0	0	0	0.000305355	0	0	0	0	0	0.000419863	0	0	k__Bacteria;p__unidentified_Bacteria;c__Clostridia;o__Oscillospirales;f__Oscillospiraceae;g__;s__
OTU_490	0	0	7.63388e-05	0	0	0	0	0	0	0	0	0	0	0	0	0	0.000152678	0	0	3.81694e-05	k__Bacteria;p__Proteobacteria;c__Gammaproteobacteria;o__Alteromonadales;f__Idiomarinaceae;g__Aliidiomarina;s__
OTU_491	0	0	0	0	0	0	0	0	0	0	0	0	0	0	0	0	0	0	0	0	k__Bacteria;p__Acidobacteriota;c__Acidobacteriae;o__Bryobacterales;f__Bryobacteraceae;g__Bryobacter;s__
OTU_492	0	0	0	7.63388e-05	3.81694e-05	0	0	0	0	0	0	0	0	0	0	0	0.000267186	0	0	0.000190847	k__Bacteria;p__Firmicutes;c__Clostridia;o__Oscillospirales;f__Ruminococcaceae;g__Ruminococcus;s__Ruminococcus_callidus
OTU_493	0	0	0	0	0	0	0	0.000114508	7.63388e-05	3.81694e-05	0.000190847	0	0.000305355	0	0	0	0	0	0	7.63388e-05	k__Bacteria
OTU_494	0	0	0	0	0	0	0	0	0	0	0	0	0	0	0	0	0	0	0	0	k__Bacteria;p__Firmicutes;c__Clostridia;o__Peptostreptococcales-Tissierellales;f__Peptostreptococcaceae;g__[Eubacterium]_yurii_group;s__
OTU_495	0	0	0	0.00125959	0.000114508	0	0	0	0	0	0	3.81694e-05	0	0	0	0	0	0	0	3.81694e-05	k__Bacteria
OTU_496	0.000190847	0.000190847	0.000114508	0	0	0.000114508	0.000152678	0	0	0	0	0	7.63388e-05	3.81694e-05	0.000152678	0	0	0	0	0	k__Bacteria;p__unidentified_Bacteria;c__Clostridia;o__Oscillospirales;f__Ruminococcaceae;g__;s__
OTU_497	0	0	0	0.000534372	3.81694e-05	0.000114508	0	0	0	0	0	0	0.000114508	0	0	0	0.000114508	0	7.63388e-05	0	k__Bacteria;p__Firmicutes;c__Clostridia;o__Oscillospirales;f__Oscillospiraceae;g__UCG-005;s__
OTU_498	0	0	0	0	0	7.63388e-05	0	0	0	0	0	0	3.81694e-05	0	0	0	0	0	0	3.81694e-05	k__Bacteria;p__unidentified_Bacteria;c__Alphaproteobacteria;o__Rhizobiales;f__Methyloligellaceae;g__;s__
OTU_499	0	0	0	3.81694e-05	0	0	0	0	0	0	0	0.000190847	0	0	0	0	0.000419863	7.63388e-05	0	0.000267186	k__Bacteria;p__Firmicutes;c__Bacilli;o__Erysipelotrichales;f__Erysipelotrichaceae;g__Holdemanella;s__
OTU_500	0	0	0	0	0	3.81694e-05	0	0	0	0	0	0	0.000916065	0	0	0	0	0	0	0	k__Bacteria;p__Myxococcota;c__Myxococcia;o__Myxococcales;f__Anaeromyxobacteraceae;g__Anaeromyxobacter;s__
OTU_501	0	0	0	0	0.000152678	0	0	0	0	0	0	0	0	0	0	0	0	0	0	3.81694e-05	k__Bacteria;p__Fusobacteriota;c__Fusobacteriia;o__Fusobacteriales;f__Leptotrichiaceae;g__Leptotrichia;s__
OTU_502	0	0	0	0	0	0	0	0	0	0	0	0	0	0	0	0	0	0	0	0	k__Bacteria;p__Firmicutes;c__Clostridia;o__Peptostreptococcales-Tissierellales;f__Anaerovoracaceae;g__Amnipila;s__
OTU_503	0	0	0	0	0	0	0	0	0	0	0	0	0	0	0	0	0	0	0	3.81694e-05	k__Bacteria;p__Actinobacteriota;c__MB-A2-108;o__;f__;g__;s__
OTU_504	0.000190847	7.63388e-05	7.63388e-05	0.000305355	3.81694e-05	0.000190847	0.000534372	0	0	0	0	0	3.81694e-05	0.000152678	0	0.000190847	0.000114508	0	0.000114508	0.000152678	k__Bacteria;p__Firmicutes;c__Clostridia;o__Oscillospirales;f__Oscillospiraceae;g__Oscillibacter;s__
OTU_505	0	0	0.000114508	0	0	3.81694e-05	7.63388e-05	0	0	0	0	0	0.000381694	0	0	3.81694e-05	0.000381694	3.81694e-05	7.63388e-05	0	k__Bacteria;p__Bacteroidota;c__Bacteroidia;o__Bacteroidales;f__Muribaculaceae;g__;s__
OTU_506	0	0	7.63388e-05	0.000114508	0	7.63388e-05	7.63388e-05	0	0	0	0	0	3.81694e-05	0	0	7.63388e-05	0.000190847	0	3.81694e-05	7.63388e-05	k__Bacteria;p__Firmicutes;c__Clostridia;o__Peptostreptococcales-Tissierellales;f__Anaerovoracaceae;g__Family_XIII_AD3011_group;s__
OTU_507	0.000687049	0.000534372	3.81694e-05	0	3.81694e-05	0	0	0	0	0	0	0	0	0.000305355	0.000419863	7.63388e-05	0	7.63388e-05	0.000534372	0	k__Bacteria;p__Firmicutes;c__Clostridia;o__Lachnospirales;f__Lachnospiraceae;g__Marvinbryantia;s__
OTU_508	0.000114508	3.81694e-05	0	0.000801557	3.81694e-05	7.63388e-05	3.81694e-05	0	0	0	0	0	0	0	0.000152678	0	0	0	3.81694e-05	0.000152678	k__Bacteria
OTU_509	0	0	0	0	0	0	0	0	0	0	0	0	0	0	0	0	0	0	0	0	k__Bacteria;p__Bacteroidota;c__Bacteroidia;o__Bacteroidales;f__Prevotellaceae;g__Prevotella
OTU_510	0	0	0	0	0	0	0	3.81694e-05	0	0	0	0	0	0	0	0	0	0	0	0	k__Bacteria;p__Firmicutes;c__Bacilli;o__Lactobacillales;f__Lactobacillaceae;g__Lactobacillus;s__Lactobacillus_parabuchneri
OTU_511	0	0	0	0	0	0	0	0	0	0	0	0	0	0	0	0	0	0	0	0	k__Bacteria;p__Gemmatimonadetes;c__unidentified_Gemmatimonadetes;o__Gemmatimonadales;f__Gemmatimonadaceae;g__Gemmatimonas;s__bacterium_Ellin5290
OTU_512	0	0	0	7.63388e-05	0	0	0.000114508	0	0	0	0	0	3.81694e-05	3.81694e-05	0	0	0	0	0	0	k__Bacteria;p__Firmicutes;c__Clostridia;o__Oscillospirales;f__[Clostridium]_methylpentosum_group;g__;s__
OTU_513	0	0	0	0	0	0	0	0	0	0	0	0	0	0	0	0	0	0	0	0	k__Bacteria;p__Verrucomicrobiota;c__Verrucomicrobiae;o__Chthoniobacterales;f__Chthoniobacteraceae;g__Chthoniobacter;s__
OTU_514	0.000152678	0.000229016	0	7.63388e-05	0	0.000152678	0.000114508	0	0	0	0	0	0.000152678	0.000458033	0.000419863	3.81694e-05	7.63388e-05	0	0	0	k__Bacteria;p__unidentified_Bacteria;c__Clostridia;o__Oscillospirales;f__Oscillospiraceae;g__;s__
OTU_515	0	0	0	0	0	0	0	0	0	0	0	0	0	0	0	0	0	0	0	0	k__Bacteria;p__Proteobacteria;c__Gammaproteobacteria;o__Xanthomonadales;f__Rhodanobacteraceae
OTU_516	0	0	0	0	0	0	0	0	0	0	0	0.000381694	0	0	0	0	0	0.000229016	0	0	k__Bacteria;p__Firmicutes;c__Clostridia;o__Oscillospirales;f__UCG-010;g__;s__
OTU_517	0	0	0	0	0	0	0	0	0	0	0	0	0	0	0	0	0	0	0	0	k__Bacteria;p__unidentified_Bacteria;c__Thermoleophilia;o__Gaiellales;f__;g__;s__
OTU_518	0	0	0	0	0	0	0	0	0	0	0	0	0	0	0	0	0	0	0	0	k__Bacteria;p__Bacteroidota;c__Bacteroidia;o__Bacteroidales;f__Tannerellaceae;g__Tannerella;s__Tannerella_forsythia
OTU_519	0	0	0	0.000114508	0.000496202	0	0	0	0	0	0	0.00133593	0	0	0	0	3.81694e-05	0.000954235	0	0.00106874	k__Bacteria;p__Firmicutes;c__Clostridia;o__Christensenellales;f__Christensenellaceae;g__Christensenellaceae_R-7_group;s__
OTU_520	0	0	0	0	0	0	0	0	0	0	0	0	0	0	0	0	0	0	0	0	k__Bacteria
OTU_521	0	0	0	0	0.000687049	0	0	0	0	0	0	0	0	0	0	0	0	0	0	0	k__Bacteria;p__Bacteroidota;c__Bacteroidia;o__Bacteroidales;f__Tannerellaceae;g__Tannerella;s__Tannerella_sp_oral_taxon_HOT-286
OTU_522	0	0	0.000229016	0	0	0.000343525	0	0	0	0	0	0	0.00133593	0	0	0	0.000725219	0	0	0	k__Bacteria;p__Bacteroidota;c__Bacteroidia;o__Bacteroidales;f__Muribaculaceae;g__;s__
OTU_523	0	0	0	0	0	0	0	0	3.81694e-05	0	0	0	0	0	0	0	0	0	0	0	k__Bacteria;p__Actinobacteriota;c__Actinobacteria;o__Streptosporangiales;f__Thermomonosporaceae
OTU_524	0	0	0	0	0	0	0	0	0	0	0	0	0	0	0	0	0	0	0	0	k__Bacteria
OTU_525	0	0	0	0	0	0	0	0	3.81694e-05	3.81694e-05	0	0	0	0	0	0	0	0	0	0	k__Bacteria;p__Firmicutes;c__Bacilli;o__Bacillales;f__Bacillaceae;g__Bacillus;s__Bacillus_thermoamylovorans
OTU_526	0	0	0	0	0	0	0	0	0	0	0	3.81694e-05	0	0	0	0	0	0	0	0	k__Bacteria;p__unidentified_Bacteria;c__Thermoleophilia;o__Gaiellales;f__;g__;s__
OTU_527	0	0	0	0	0	0	0	0	0	0	0	0.000114508	0	0	0	0	0	3.81694e-05	0	0	k__Bacteria;p__Fusobacteriota;c__Fusobacteriia;o__Fusobacteriales;f__Fusobacteriaceae;g__Fusobacterium
OTU_528	0.000114508	0.000381694	0	0.000114508	3.81694e-05	3.81694e-05	0.000152678	0	0	0	0	0	7.63388e-05	0.000152678	0.000190847	3.81694e-05	3.81694e-05	3.81694e-05	0.000114508	0.000534372	k__Bacteria;p__Firmicutes;c__Clostridia;o__Lachnospirales;f__Lachnospiraceae
OTU_529	0	0	0	0	0	0	0	3.81694e-05	0	7.63388e-05	3.81694e-05	0	0	0	0	0	0	0	0	0	k__Bacteria;p__Actinobacteriota;c__Actinobacteria;o__Micrococcales;f__Micrococcaceae;g__Nesterenkonia;s__Nesterenkonia_sp
OTU_530	0	0	0	0	0.000190847	0	0	0	0	0	0	0.000458033	0	0	0	0	0	0.00064888	0	0	k__Bacteria;p__Bacteroidota;c__Bacteroidia;o__Bacteroidales;f__Rikenellaceae;g__Rikenellaceae_RC9_gut_group;s__
OTU_531	0	0	0	0	0	0	0	0	0	0	0	0	0	0	0	0	0	0	0	7.63388e-05	k__Bacteria;p__Firmicutes;c__Clostridia;o__Peptostreptococcales-Tissierellales;f__Peptostreptococcaceae;g__Filifactor;s__
OTU_532	0	0	0	0	0	0	0	0	0	0	3.81694e-05	0	0	0	0	0	0	0	0	0	k__Bacteria;p__unidentified_Bacteria;c__Acidobacteriae;o__Acidobacteriales;f__;g__;s__
OTU_533	3.81694e-05	0	0	0	0	0	0	0	0	0	0	0	0	0	0	0	0	0	0	0	k__Bacteria
OTU_534	0	0	0	0	0.000152678	0	0	0	0	0	3.81694e-05	3.81694e-05	0	0	0	0	0	3.81694e-05	0	0	k__Bacteria;p__unidentified_Bacteria;c__Clostridia;o__Oscillospirales;f__Ruminococcaceae;g__;s__
OTU_535	0	0	7.63388e-05	3.81694e-05	0	0.00122142	0	0	0	0	0	0	0.000419863	0	0	0	0.00125959	3.81694e-05	0	0	k__Bacteria;p__Proteobacteria;c__Gammaproteobacteria;o__Burkholderiales;f__Sutterellaceae;g__Parasutterella;s__Burkholderiales_bacterium_YL45
OTU_536	0.000114508	0	0	0.000114508	0.000114508	0.000305355	3.81694e-05	0	0	0	0	0	0	0	0	0	0.000725219	0	0	7.63388e-05	k__Bacteria;p__Firmicutes;c__Clostridia;o__Lachnospirales;f__Lachnospiraceae;g__Blautia;s__
OTU_537	0	0	0	0	0	0	0	0	0	0	0	0	0	0	0	0	0	0	0	0	k__Bacteria;p__Proteobacteria;c__Gammaproteobacteria;o__Pseudomonadales;f__Moraxellaceae;g__Enhydrobacter;s__Moraxella_osloensis
OTU_538	0	0	0	0	0	0	0	0	0	0	0	0	0	0	0	0	0.00267186	0	0	0	k__Bacteria;p__Firmicutes;c__Clostridia;o__Lachnospirales;f__Lachnospiraceae;g__Lachnoclostridium
OTU_539	0	0	0	0	0	0	0	0	0	0	0	0	0	0	0	0	0	0	0	0	k__Bacteria;p__Proteobacteria;c__Alphaproteobacteria;o__Acetobacterales;f__Acetobacteraceae;g__Acetobacter;s__Acetobacter_tropicalis
OTU_540	0	0	0	0	0	0	0	0	3.81694e-05	0	0.000114508	0	7.63388e-05	0	0	0	0	0	0	0	k__Bacteria;p__Proteobacteria;c__Alphaproteobacteria;o__Sphingomonadales;f__Sphingomonadaceae;g__Sphingomonas;s__
OTU_541	0	0	0	0	0	0	0	0.000114508	7.63388e-05	7.63388e-05	0.000152678	0	0	0	0	0	0	0	0	0	k__Bacteria
OTU_542	0	0	0	0	0	0	0	7.63388e-05	3.81694e-05	0	3.81694e-05	0.000229016	0	0	0	0	0	0	0	0	k__Bacteria;p__Actinobacteriota;c__Rubrobacteria;o__Rubrobacterales;f__Rubrobacteriaceae;g__Rubrobacter;s__
OTU_543	0	0	0	0	0	0	0	0	0	0	0	0	0	0	0	0	0	0	0	0	k__Bacteria;p__Bacteroidota;c__Bacteroidia;o__Chitinophagales;f__Chitinophagaceae;g__Flavisolibacter;s__
OTU_544	0	0	0	0.000534372	0.000687049	7.63388e-05	0	0	0	0	0	0	0.000229016	7.63388e-05	7.63388e-05	0	0.000305355	7.63388e-05	0	7.63388e-05	k__Bacteria;p__unidentified_Bacteria;c__Clostridia;o__Lachnospirales;f__Lachnospiraceae;g__;s__
OTU_545	0	0	0	0	0	0	0	0	0	0	0	0	0	0	0	0	0	0	0	0	k__Bacteria;p__Firmicutes;c__Negativicutes;o__Veillonellales-Selenomonadales;f__Veillonellaceae;g__Megasphaera;s__Megasphaera_elsdenii
OTU_546	0	0	0	0	0	0	0	3.81694e-05	0	0	0	0	0	0	0	0	0	0	0	0	k__Bacteria;p__unidentified_Bacteria;c__Vicinamibacteria;o__Vicinamibacterales;f__;g__;s__
OTU_547	0.000152678	0	0	0.000152678	0	7.63388e-05	0	0	0	0	0	0	0	0	0	7.63388e-05	7.63388e-05	0	0	0	k__Bacteria;p__Firmicutes;c__Bacilli;o__RF39;f__;g__;s__
OTU_548	0	0	0	0	0	3.81694e-05	0	0	7.63388e-05	0	7.63388e-05	0	3.81694e-05	0	0	0	0	0	0	0	k__Bacteria;p__Firmicutes;c__Bacilli;o__Bacillales;f__Bacillaceae;g__Bacillus
OTU_549	0	0	0.000190847	0.00225199	0	0	0	0	0	0	0	0	0	0	0	0	0	0	0	0	k__Bacteria
OTU_550	0.000381694	0.000763388	0	0	0	0.00064888	0	0	0	0	0	0	0.000229016	0	0.00145044	0	0	0	0	0	k__Bacteria;p__Firmicutes;c__Clostridia;o__Lachnospirales;f__Lachnospiraceae;g__Lachnospiraceae_NK4A136_group;s__
OTU_551	0	0	0	0	0.000114508	0	0	0	0	0	0	0.000305355	0	0	0	0	0	7.63388e-05	0	0.000152678	k__Bacteria;p__Firmicutes;c__Clostridia;o__Christensenellales;f__Christensenellaceae;g__Christensenellaceae_R-7_group;s__
OTU_552	0.000152678	3.81694e-05	0	0	0.000114508	0.000190847	7.63388e-05	0	0	3.81694e-05	0	0	0.000496202	3.81694e-05	0	0	0	0.000229016	0	0	k__Bacteria;p__Firmicutes;c__Bacilli;o__Erysipelotrichales;f__Erysipelatoclostridiaceae;g__;s__
OTU_553	0	0	0	0	0	0	0	0	0	0	0	0	0	0	0	0	0	0	0	0	k__Bacteria;p__unidentified_Bacteria;c__Acidobacteriae;o__Acidobacteriales;f__;g__;s__
OTU_554	0	0	0	0	0	0	0	0	0	0	0	0.000114508	0	0	0	0	0	0	0	0	k__Bacteria;p__Actinobacteriota;c__Thermoleophilia;o__Solirubrobacterales;f__67-14;g__;s__
OTU_555	0	0.000152678	3.81694e-05	0	0	0.000152678	0	0	0	0	0	0	7.63388e-05	7.63388e-05	0	0	3.81694e-05	0	0	0	k__Bacteria;p__Firmicutes;c__Clostridia;o__Clostridia_vadinBB60_group;f__;g__;s__
OTU_556	0	0	0	0	0	0	0	0	0	0	0	0	0	0	0	0	0	0	0	0	k__Bacteria;p__Proteobacteria;c__Gammaproteobacteria;o__Burkholderiales;f__Burkholderiaceae;g__Lautropia;s__
OTU_557	0	0	0	0	0	0	0	0	0	0	3.81694e-05	0	0	0	0	0	0	0	0	0	k__Bacteria;p__Firmicutes;c__Bacilli;o__Lactobacillales;f__Lactobacillaceae;g__Lactobacillus;s__Lactobacillus_iners
OTU_558	0	0	0	0	0	0	0	0	0	0	0	0	0	0	0	0	0	0	0	0	k__Bacteria;p__Firmicutes;c__Clostridia;o__Oscillospirales;f__Oscillospiraceae;g__Oscillibacter;s__Oscillibacter_sp_PEA192
OTU_559	0	0	0	0	0	3.81694e-05	0	7.63388e-05	3.81694e-05	7.63388e-05	0	0	3.81694e-05	0	0	0	0	0	0	0	k__Bacteria;p__unidentified_Bacteria;c__Alphaproteobacteria;o__Azospirillales;f__;g__;s__
OTU_560	3.81694e-05	0	0	0	0	0.000152678	0	0	0	0	0	0	0	7.63388e-05	7.63388e-05	0	0	0	0	0	k__Bacteria;p__Firmicutes;c__Clostridia;o__Clostridia_vadinBB60_group;f__;g__;s__
OTU_561	0	0	0	0	0	0	0	0	0	0	0	0	0	0	0	0	0	0	0	0.000305355	k__Bacteria
OTU_562	0	3.81694e-05	0	0	0	0	0.000190847	0	0	0	0	0	7.63388e-05	0	3.81694e-05	0	0	0	0	0	k__Bacteria;p__Firmicutes;c__Clostridia;o__Monoglobales;f__Monoglobaceae;g__Monoglobus;s__
OTU_563	0	0	0	0	0	0	0	0	0	0	0	0	0	0	0	0	0	0	0	0	k__Bacteria
OTU_564	0	0	0	0	0	0	0	0	0	0	0	0	0	0	0	0	0	0	0	0.000229016	k__Bacteria;p__Fusobacteriota;c__Fusobacteriia;o__Fusobacteriales;f__Leptotrichiaceae;g__Leptotrichia;s__Leptotrichia_sp_oral_clone_FP036
OTU_565	0	0	0	0	0	0.000114508	0	0	0	3.81694e-05	7.63388e-05	0	0	0	0	0	0	0	0	0	k__Bacteria;p__Firmicutes;c__Clostridia;o__Clostridia_UCG-014;f__;g__;s__
OTU_566	0	0	0	0	0	0	0	0	0	0	0	0	0	0	0	7.63388e-05	0	0	0	0	k__Bacteria;p__Proteobacteria;c__Gammaproteobacteria;o__Burkholderiales;f__Comamonadaceae;g__Comamonas;s__Comamonas_aquatica
OTU_567	0	0	0	0	0	0	0	0.000190847	7.63388e-05	3.81694e-05	0.000190847	0	0	0	0	0	0	0	0	0	k__Bacteria;p__unidentified_Bacteria;c__unidentified_Bacteria;o__Gemmatimonadales;f__Gemmatimonadaceae;g__;s__
OTU_568	0	0	0	3.81694e-05	0.000229016	3.81694e-05	7.63388e-05	0	0	0	0	0.000190847	0	3.81694e-05	0	0	0	0.000229016	3.81694e-05	0	k__Bacteria;p__unidentified_Bacteria;c__Clostridia;o__Oscillospirales;f__Oscillospiraceae;g__unidentified_Oscillospiraceae;s__Pseudoflavonifractor_sp_Marseille-P3106
OTU_569	0	0	0	0	0	3.81694e-05	0	0	0	0	0	0	7.63388e-05	0	0	0	0	0	0	0	k__Bacteria;p__Chloroflexi;c__Anaerolineae;o__Anaerolineales;f__Anaerolineaceae;g__UTCFX1;s__
OTU_570	0	0	0	0	0	0	0	0	0	0	0	0	0	0	0	0	0	0	0	0	k__Bacteria;p__Firmicutes;c__Negativicutes;o__Acidaminococcales;f__Acidaminococcaceae;g__Acidaminococcus
OTU_571	0	0	0	0	0	0	0	0	0	0	0	0	0	0	0	0	0	0	0	0	k__Bacteria;p__Myxococcota;c__Polyangia;o__Haliangiales;f__Haliangiaceae;g__Haliangium;s__
OTU_572	0	0	0	0	0	0	0	0	0	0	0	0	0	0	0	0	0	0	0	0	k__Bacteria;p__Firmicutes;c__Bacilli;o__Erysipelotrichales;f__Erysipelatoclostridiaceae;g__Erysipelatoclostridium
OTU_573	0	0	0	0	0	0	0	0	0	0	0	0	0	0	0	0	0	0	0	0	k__Bacteria;p__unidentified_Bacteria;c__Bacteroidia;o__Cytophagales;f__Microscillaceae
OTU_574	3.81694e-05	0	0.000343525	0.000343525	0.000114508	0.000458033	0	0	0	0	0	0	7.63388e-05	3.81694e-05	0	0	7.63388e-05	0	0	3.81694e-05	k__Bacteria;p__Firmicutes;c__Bacilli;o__Acholeplasmatales;f__Acholeplasmataceae;g__Anaeroplasma;s__
OTU_575	0	0	0	0	0	0	0	0	0	7.63388e-05	3.81694e-05	0	0	0	0	0	0	0	0	3.81694e-05	k__Bacteria;p__Actinobacteriota;c__Actinobacteria;o__Micrococcales;f__Microbacteriaceae
OTU_576	3.81694e-05	7.63388e-05	3.81694e-05	0	0	0.000229016	0.000152678	0	0	0	0	0	3.81694e-05	0.000190847	0.000114508	0	3.81694e-05	0	0.000229016	0	k__Bacteria;p__Firmicutes;c__Clostridia;o__Clostridia_vadinBB60_group;f__;g__;s__
OTU_577	3.81694e-05	0	0	3.81694e-05	0	0.000190847	3.81694e-05	0	0	0	0	0	3.81694e-05	0	3.81694e-05	0	7.63388e-05	0	0	0	k__Bacteria;p__Firmicutes;c__Clostridia;o__Oscillospirales;f__Ruminococcaceae;g__Anaerotruncus;s__
OTU_578	0.000114508	0	7.63388e-05	3.81694e-05	0.000343525	0	0	0	0	0	0	0	0	3.81694e-05	0	0	7.63388e-05	0	0.000114508	0	k__Bacteria;p__Firmicutes;c__Clostridia;o__Eubacteriales;f__Anaerofustaceae;g__Anaerofustis;s__
OTU_579	0	0	0	7.63388e-05	0	0	0	3.81694e-05	7.63388e-05	0.000152678	7.63388e-05	0.000419863	0	0	0	0	0	0	0	3.81694e-05	k__Bacteria;p__Actinobacteriota;c__Actinobacteria;o__Frankiales;f__Geodermatophilaceae;g__Blastococcus;s__
OTU_580	0	0	0	0	0	0	0	0	0	0	0	0	3.81694e-05	0	0	0	0.000992404	0	0	0	k__Bacteria;p__Firmicutes;c__Clostridia;o__Lachnospirales;f__Lachnospiraceae;g__Lachnospiraceae_ND3007_group;s__
OTU_581	7.63388e-05	0	0.000419863	0.000534372	3.81694e-05	0.000152678	0.000152678	0	0	7.63388e-05	0	0	0.000152678	0.000190847	3.81694e-05	7.63388e-05	7.63388e-05	0	0	0	k__Bacteria;p__Firmicutes;c__Clostridia;o__Oscillospirales;f__Butyricicoccaceae;g__Butyricicoccus;s__
OTU_582	0	0	0.000419863	0	0	0.000381694	0	0	0	0	0	0	0.000190847	0	0	0	7.63388e-05	0	0	0	k__Bacteria;p__Bacteroidota;c__Bacteroidia;o__Bacteroidales;f__Muribaculaceae;g__;s__
OTU_583	0	0	0	0	0	0	0	0	0	0	0	0	0	0	0	0	0	0	0	0	k__Bacteria;p__Proteobacteria;c__Gammaproteobacteria;o__Burkholderiales;f__SC-I-84
OTU_584	0	0	0	0	0	0.0028627	0	0	0	0	0	0	0.00282454	0	0	0	0	0	0	0	k__Bacteria;p__Proteobacteria;c__Gammaproteobacteria;o__Ectothiorhodospirales;f__Thioalkalispiraceae;g__Thioalkalispira-Sulfurivermis;s__
OTU_585	0	0	0	0	0	0	0	3.81694e-05	3.81694e-05	0	0	0	0	0	0	0	0	0	0	0	k__Bacteria;p__Proteobacteria;c__Gammaproteobacteria;o__R7C24;f__;g__;s__
OTU_586	0	0	0	0	0	0.000381694	0	0	0	0	0	0	0.000114508	0	0	0	0	0	0	0	k__Bacteria;p__Actinobacteriota;c__Actinobacteria;o__Propionibacteriales;f__Nocardioidaceae
OTU_587	0	0	0	0	0	0	0	0	0	0	3.81694e-05	0.000114508	0	0	0	0	0	0	0	0	k__Bacteria;p__Actinobacteriota;c__Thermoleophilia;o__Solirubrobacterales;f__Solirubrobacteraceae;g__Solirubrobacter;s__
OTU_588	0	0	0	0	0	0	0	0	0	0	0	0	0	0	0	0	0	0	0	0	k__Bacteria;p__Proteobacteria;c__Gammaproteobacteria;o__Pasteurellales;f__Pasteurellaceae;g__Aggregatibacter;s__Aggregatibacter_segnis
OTU_589	0	0	0	0	0	0	0	0	0	0	0	0	0	0	0	0	0	0	0	0	k__Bacteria;p__unidentified_Bacteria;c__Acidobacteriae;o__Acidobacteriales;f__;g__;s__
OTU_590	0	0	0	0.000190847	0	0.000267186	0	0	0	0	0	0	0.000152678	0	0	0	7.63388e-05	0	0.000572541	0	k__Bacteria;p__Firmicutes;c__Clostridia;o__Lachnospirales;f__Lachnospiraceae
OTU_591	0.000114508	7.63388e-05	0	0	3.81694e-05	3.81694e-05	0.000114508	0	0	0	0	0	3.81694e-05	7.63388e-05	3.81694e-05	0	3.81694e-05	3.81694e-05	7.63388e-05	0	k__Bacteria;p__Firmicutes;c__Clostridia;o__Lachnospirales;f__Lachnospiraceae
OTU_592	0.000152678	3.81694e-05	0	0	0	0	0	0	0	0	0	0	0.000190847	0	3.81694e-05	0	3.81694e-05	0	0	0	k__Bacteria;p__Firmicutes;c__Clostridia;o__Lachnospirales;f__Lachnospiraceae
OTU_593	0	0	0	0	0	0	0	0	0	0	0	0	0.000152678	0	0	0	0	0	0	0	k__Bacteria;p__unidentified_Bacteria;c__Bacteroidia;o__Cytophagales;f__Microscillaceae;g__;s__
OTU_594	0	0	0	0	7.63388e-05	0	0	0	0	0	0	0	0	0	0	0	0.000229016	0	0	3.81694e-05	k__Bacteria;p__Firmicutes;c__Clostridia;o__Oscillospirales;f__Oscillospiraceae;g__UCG-002;s__
OTU_595	0	0	0	0	0	0	0	3.81694e-05	0	0	3.81694e-05	0	7.63388e-05	0	0	0	0	0	0	0	k__Bacteria;p__Actinobacteriota;c__Thermoleophilia;o__Gaiellales;f__Gaiellaceae;g__Gaiella;s__
OTU_596	0	0	3.81694e-05	0	0.000267186	0.000152678	0	7.63388e-05	3.81694e-05	0	0	0	0.000114508	0	0	0	0	0	0	7.63388e-05	k__Bacteria;p__Actinobacteriota;c__Actinobacteria;o__Micrococcales;f__Intrasporangiaceae
OTU_597	0	0	0	0	0	3.81694e-05	0	0	0	0	0	0	3.81694e-05	0	0	0	0	0	0	0	k__Bacteria;p__Actinobacteriota;c__Actinobacteria;o__Micrococcales;f__Dermabacteraceae;g__Brachybacterium;s__Brachybacterium_paraconglomeratum
OTU_598	0	0	0	0	0	0	0	0	0	0	0	0	0	0	0	0	0	0	0	0	k__Bacteria;p__unidentified_Bacteria;c__Acidobacteriae;o__Acidobacteriales;f__;g__;s__
OTU_599	0	0	0	0	0	0	0	0.000114508	0	3.81694e-05	3.81694e-05	0	0	0	0	0	0	0	0	0	k__Bacteria;p__unidentified_Bacteria;c__Alphaproteobacteria;o__Micropepsales;f__Micropepsaceae;g__;s__
OTU_600	0	0	0	0	0	0	0	0	0	0	0	0	0	0	0	0	0	0	0.000114508	0	k__Bacteria;p__Firmicutes;c__Clostridia;o__Lachnospirales;f__Lachnospiraceae;g__Roseburia;s__
OTU_601	0	0	0	3.81694e-05	7.63388e-05	0	0	0	0	0	0	0.000763388	0	0	0	0	0	0.000419863	0	0	k__Bacteria;p__Synergistota;c__Synergistia;o__Synergistales;f__Synergistaceae;g__Pyramidobacter;s__
OTU_602	3.81694e-05	3.81694e-05	0	0.000152678	0.000114508	3.81694e-05	7.63388e-05	0	0	0	0	0	0	0	0	7.63388e-05	0	0	0	0	k__Bacteria;p__Actinobacteriota;c__Coriobacteriia;o__Coriobacteriales;f__Eggerthellaceae;g__Enterorhabdus;s__
OTU_603	0	0	0	0	0	0	0	0	0	0	0	0	0	0	0	0	0	0	0	0	k__Bacteria;p__Proteobacteria;c__Gammaproteobacteria;o__Pseudomonadales;f__Pseudomonadaceae;g__Pseudomonas;s__Pseudomonas_stutzeri
OTU_604	0	0	0	0	0	0	0	0	0	0	0	0	0	0	0	0	0	0	0	0	k__Bacteria;p__unidentified_Bacteria;c__Bacteroidia;o__Chitinophagales;f__Chitinophagaceae
OTU_605	0	0	0	0	0	0	0	0	0	0	0	0	0	0	0	0	0	0	0	0	k__Bacteria;p__Bacteroidota;c__Bacteroidia;o__Chitinophagales;f__Chitinophagaceae;g__Edaphobaculum;s__
OTU_606	0	0.000114508	0	0.000343525	0	3.81694e-05	7.63388e-05	0	0	0	0	0	0	0	0	0	0	0	0	3.81694e-05	k__Bacteria;p__Firmicutes;c__Bacilli;o__RF39;f__;g__;s__
OTU_607	0.000190847	0.000114508	0.000152678	0.000152678	3.81694e-05	0.000152678	0.000152678	0	0	0	0	0	0.000152678	0.000534372	0.000152678	0	0.000152678	0	7.63388e-05	3.81694e-05	k__Bacteria;p__Firmicutes;c__Clostridia;o__Oscillospirales;f__Oscillospiraceae
OTU_608	0	0	0	0	0	0	0	0.000114508	0.000190847	7.63388e-05	0.000114508	0	0.000229016	0	0	0	0	0	0	0.000114508	k__Bacteria;p__Proteobacteria;c__Gammaproteobacteria;o__Steroidobacterales;f__Steroidobacteraceae;g__Steroidobacter;s__
OTU_609	0	0	0	0	0	0	0	0	0	0	0	0	0	0	0	0	0	0	0	0	k__Bacteria;p__Firmicutes;c__Clostridia;o__Lachnospirales;f__Lachnospiraceae;g__Eisenbergiella;s__
OTU_610	0	0	0	0	0	0	0	3.81694e-05	0	0	3.81694e-05	0	0	0	0	0	0	0	0	3.81694e-05	k__Bacteria;p__Proteobacteria;c__Gammaproteobacteria;o__Burkholderiales;f__Nitrosomonadaceae;g__Nitrosospira;s__
OTU_611	0	0	0	0	0	0	0	0	0	0	0	0	0	0	0	0	0	0	0	0	k__Bacteria;p__Spirochaetota;c__Spirochaetia;o__Spirochaetales;f__Spirochaetaceae;g__Treponema;s__Treponema_refringens
OTU_612	0	0	0	0	0	0	0	0	0	0	0	0	0	0	0	0	0	0	0	0	k__Bacteria;p__Proteobacteria;c__Gammaproteobacteria;o__Burkholderiales;f__B1-7BS;g__;s__
OTU_613	0	0	0	0	0	0	0	0	0	0	0	0	0	0	0	0	0	0	0	0	k__Bacteria;p__Bacteroidota;c__Bacteroidia;o__Bacteroidales;f__Prevotellaceae;g__Prevotella;s__Prevotella_sp_oral_clone_DA058
OTU_614	0	0	3.81694e-05	0	0	0	0	0	0	0	0	0	0	0	0	0	0	0.000305355	0	0	k__Bacteria;p__Proteobacteria;c__Gammaproteobacteria;o__Pseudomonadales;f__Moraxellaceae;g__Acinetobacter
OTU_615	0	0	0	0	0	0	0	0	0	3.81694e-05	0	0	0	0	0	0	0	0	0	0	k__Bacteria;p__Bacteroidota;c__Bacteroidia;o__Bacteroidales;f__Bacteroidaceae;g__Bacteroides;s__Bacteroides_coprocola
OTU_616	0	0	0	3.81694e-05	0	0.000152678	0.000114508	0	0	0	0	3.81694e-05	0.000152678	0	0	0	0	0	0	0.000267186	k__Bacteria;p__Firmicutes;c__Clostridia;o__Lachnospirales;f__Lachnospiraceae;g__Lachnospiraceae_UCG-001;s__
OTU_617	0	0	0	0	0	0	0	0	0	0	0	0	0	0	0	0	0	0	0	0	k__Bacteria;p__Firmicutes;c__Negativicutes;o__Veillonellales-Selenomonadales;f__Veillonellaceae;g__Anaeroglobus;s__Anaeroglobus_geminatus
OTU_618	3.81694e-05	0	0	0	0	0.000190847	0	0	0	0	0	0	0	0	0	0	0	0	7.63388e-05	0	k__Bacteria
OTU_619	0	0	0	0	0	0	0	0	0	3.81694e-05	0	0	0	0	0	0	0	0	0	0.000114508	k__Bacteria;p__Chloroflexi;c__Dehalococcoidia;o__S085;f__;g__;s__
OTU_620	0	0	0	0	0	0	0	0	0	0	0	0	0	0	0	0	0	0	0	0	k__Bacteria;p__Actinobacteriota;c__Thermoleophilia;o__Gaiellales;f__Gaiellaceae;g__Gaiella;s__
OTU_621	0	0	0	0	0	0	0	3.81694e-05	0	0	0	0	3.81694e-05	0	0	0	0	0	0	0.000152678	k__Bacteria;p__Proteobacteria;c__Alphaproteobacteria;o__Rhizobiales;f__Methyloligellaceae;g__;s__
OTU_622	0	0	0	0	0	0	0	0	0	0	0	0	0	0	0	0	0	0	0	0	k__Bacteria;p__Actinobacteriota;c__Actinobacteria;o__Streptosporangiales;f__Streptosporangiaceae;g__Microbispora;s__Microbispora_rosea
OTU_623	0	3.81694e-05	0	3.81694e-05	0	0.000114508	7.63388e-05	0	0	0	0	0	0	7.63388e-05	0	0	0	0	3.81694e-05	0	k__Bacteria;p__Firmicutes;c__Clostridia;o__Oscillospirales;f__Ruminococcaceae;g__Harryflintia;s__
OTU_624	0.000305355	0.000229016	0	0	0	0	0	0	0	0	0	0	0	0.000305355	3.81694e-05	0	0	0	0.000954235	0	k__Bacteria;p__Campilobacterota;c__Campylobacteria;o__Campylobacterales;f__Campylobacteraceae;g__Campylobacter;s__Campylobacter_jejuni
OTU_625	0	0	3.81694e-05	7.63388e-05	0	0.000190847	0.000496202	0	0	0	0	0	0	0.000114508	0.000152678	0	3.81694e-05	0	0	0	k__Bacteria;p__Firmicutes;c__Clostridia;o__Clostridia_vadinBB60_group;f__;g__;s__
OTU_626	0	0	0	0	0	0	0	0	0	0	0	0	0	0	0	0	0.000152678	0	0	0	k__Bacteria;p__Firmicutes;c__Clostridia;o__Lachnospirales;f__Lachnospiraceae;g__Tyzzerella;s__
OTU_627	0	0	0	0	0	0	0	0	0	0	0	0	0	0	0	0	0	0	0	0	k__Bacteria;p__unidentified_Bacteria;c__Ktedonobacteria;o__Ktedonobacterales;f__Ktedonobacteraceae;g__;s__
OTU_628	0	0	0	0	0	0	0	0	0	0	0	0.00145044	0	0	0	0	0	0	0	0	k__Bacteria;p__Acidobacteriota;c__Blastocatellia;o__Pyrinomonadales;f__Pyrinomonadaceae;g__RB41;s__
OTU_629	0	0	0	0	0	0	0	0	0	0	0	0	0	0	0	0	0	0	0	0	k__Bacteria;p__Proteobacteria;c__Alphaproteobacteria;o__Caulobacterales;f__Caulobacteraceae;g__Brevundimonas;s__Brevundimonas_vesicularis
OTU_630	0	0	0	0	0	3.81694e-05	0	0	0	0	0	0	3.81694e-05	0	0	0	0	0	0	0	k__Bacteria
OTU_631	0	0	0	0	0	0	0	0	0	0	0	0	0	0	0	0	0	0	0	0	k__Bacteria;p__unidentified_Bacteria;c__Bacteroidia;o__Chitinophagales;f__Chitinophagaceae;g__;s__
OTU_632	0	0	0	0	0	0	0	0	0	0	0	0	0	0	0	0	0	0	0	0	k__Bacteria;p__Proteobacteria;c__Gammaproteobacteria;o__Cardiobacteriales;f__Cardiobacteriaceae;g__Cardiobacterium;s__
OTU_633	0	0	0	0	0	0	0	0	0	0	0	0	0	0	0	0	0	0	0	0.000152678	k__Bacteria
OTU_634	0	0	0	0	0	0	0	0	0	0	0	0	0	0	0	0	0	0	0	0	k__Bacteria;p__unidentified_Bacteria;c__unidentified_Bacteria;o__Gemmatimonadales;f__Gemmatimonadaceae;g__unidentified_Gemmatimonadaceae;s__Gemmatimonadetes_bacterium_WWH24
OTU_635	0	0	0	0	0	0	0	0	0	0	0	0	0	0	0	0	0	0	0	0	k__Bacteria;p__Verrucomicrobiota;c__Verrucomicrobiae;o__Pedosphaerales;f__Pedosphaeraceae;g__;s__
OTU_636	0	0	0	0	0	0	0	3.81694e-05	0	0.000190847	0.000190847	0	0	0	0	0	0	0	0	0	k__Bacteria;p__Chloroflexi;c__Gitt-GS-136;o__;f__;g__;s__
OTU_637	0	0	0.000152678	0	0	7.63388e-05	0	0	0	0	0	0	7.63388e-05	0	0	0	0.000152678	0.000152678	0	3.81694e-05	k__Bacteria;p__Firmicutes;c__Bacilli;o__Lactobacillales;f__Leuconostocaceae;g__Leuconostoc;s__Leuconostoc_mesenteroides
OTU_638	0	0	0	0	0	0	0	0	0	0	0	0	0	0	0	0	0	0	0	0	k__Bacteria;p__Bacteroidota;c__Bacteroidia;o__Bacteroidales;f__Paludibacteraceae;g__F0058;s__
OTU_639	0	0	0	0	0	0	0	3.81694e-05	3.81694e-05	7.63388e-05	0	0	0	0	0	0	0	0	0	0	k__Bacteria
OTU_640	0	0	0	0	0	0	0	0	0	0	0	0	0	0	0	0	0	0	0	0	k__Bacteria;p__Spirochaetota;c__Spirochaetia;o__Spirochaetales;f__Spirochaetaceae;g__Treponema;s__Treponema_bryantii
OTU_641	0	0	0	0	0	0.000114508	0	3.81694e-05	0	0	0	0	0.000381694	0	0	0	0	0	0	0	k__Bacteria;p__Nitrospirota;c__Nitrospira;o__Nitrospirales;f__Nitrospiraceae;g__;s__
OTU_642	0	0	0	0	0	0	0	0	0	0	0	0	0	0	0	0	0	0	0	0	k__Bacteria;p__Acidobacteriota;c__Acidobacteriae;o__Acidobacteriales;f__Koribacteraceae;g__Candidatus_Koribacter;s__
OTU_643	0	0	0	0	0	0	0	0	0	0	0	0	0	0	0	0	0	0	0	0	k__Bacteria;p__Bacteroidota;c__Bacteroidia;o__Bacteroidales
OTU_644	0	0	0	0	0	0	0	0	0	0	0	0	0	0	0	0	0	0	0	0	k__Bacteria;p__unidentified_Bacteria;c__Thermoleophilia;o__Gaiellales;f__unidentified_Gaiellales;g__unidentified_Gaiellales;s__bacterium_Ellin6515
OTU_645	0	0	0	0	3.81694e-05	3.81694e-05	0	0	0	0	0	0	0	0	0	0	0	0	3.81694e-05	0	k__Bacteria
OTU_646	0	0	0	0	0	0	0	0	0	0	0	0	0	0	0	0	0	0	0	0	k__Bacteria;p__Latescibacterota;c__;o__;f__;g__;s__
OTU_647	0	0	0	0	0	0	0	0	0	0	0	0	0	0	0	0	0	0	0	0	k__Bacteria;p__Firmicutes;c__Clostridia;o__Lachnospirales;f__Lachnospiraceae;g__Oribacterium;s__Lachnospiraceae_oral_clone_MCE9_31
OTU_648	0.000229016	0.000190847	0.000229016	0	0	0.000152678	7.63388e-05	0	0	0	0	0.000114508	0	7.63388e-05	0	0.000572541	7.63388e-05	0	0.000152678	0	k__Bacteria;p__Bacteroidota;c__Bacteroidia;o__Bacteroidales;f__Muribaculaceae;g__;s__
OTU_649	0	0	0	0	0	0	0	0	0	0	0	0	0	0	0	0	0	0	0	0	k__Bacteria;p__unidentified_Bacteria;c__Saccharimonadia;o__Saccharimonadales;f__Saccharimonadaceae;g__Candidatus_Saccharimonas;s__
OTU_650	0.00175579	0.000267186	0.000381694	0.0083591	0.000343525	0.00167945	0.000381694	3.81694e-05	0	0	0	3.81694e-05	0.000458033	0.00217566	0.00061071	0.00064888	0.000725219	3.81694e-05	0.00209932	0.000458033	k__Bacteria;p__Firmicutes;c__Clostridia;o__Clostridia_UCG-014;f__;g__;s__
OTU_651	0	0	0	0	0	0	0	3.81694e-05	0	0	3.81694e-05	0	0	0	0	0	0	0	0	0	k__Bacteria;p__unidentified_Bacteria;c__Alphaproteobacteria;o__;f__;g__;s__
OTU_652	0	0	0	0	0	3.81694e-05	0	7.63388e-05	7.63388e-05	0	0	0	0	0	0	0	0	0	0	0	k__Bacteria;p__Acidobacteriota;c__Vicinamibacteria;o__Vicinamibacterales;f__Vicinamibacteraceae;g__;s__
OTU_653	0	0	0	0	0	0	0	7.63388e-05	0	0	0.000152678	0	0	0	0	0	0	0	0	0	k__Bacteria;p__Chloroflexi;c__Gitt-GS-136;o__;f__;g__;s__
OTU_654	0	0	0	0	0	0	0	0	0	0	0	0	0	0	0	0	0	0	0	0	k__Bacteria
OTU_655	0	0	0	0	0	0	0	0	0	0	0	0	0	0	0	0	0	0	0	0	k__Bacteria;p__unidentified_Bacteria;c__Gammaproteobacteria;o__Diplorickettsiales;f__Diplorickettsiaceae;g__;s__
OTU_656	0	0	0	3.81694e-05	3.81694e-05	0	0	0	0	0	0	0	0	0	0	0	0	3.81694e-05	0	0.000190847	k__Bacteria;p__Firmicutes;c__Clostridia;o__Christensenellales;f__Christensenellaceae;g__Christensenellaceae_R-7_group
OTU_657	0.000114508	3.81694e-05	0.000229016	0	0	0.000229016	0	0	0	0	0	0	3.81694e-05	0	0.000152678	0	3.81694e-05	0	0.000152678	0	k__Bacteria;p__Firmicutes;c__Clostridia;o__Clostridia_vadinBB60_group;f__;g__;s__
OTU_658	0	0	0	0	0	7.63388e-05	0	0	0	3.81694e-05	7.63388e-05	0	0.00061071	0	0	0	0	0	0	0	k__Bacteria;p__unidentified_Bacteria;c__unidentified_Bacteria;o__Gemmatimonadales;f__Gemmatimonadaceae;g__;s__
OTU_659	0	0	0	0	0	0	0	0.000381694	0	0.000305355	0.000152678	0	0	0	0	0	0	0	0	3.81694e-05	k__Bacteria;p__Acidobacteriota;c__Acidobacteriae;o__Subgroup_2;f__;g__;s__
OTU_660	0	0	0	0	0	0	0	3.81694e-05	0	0	3.81694e-05	7.63388e-05	0	0	0	0	0	0	0	0	k__Bacteria;p__Actinobacteriota;c__Actinobacteria;o__Propionibacteriales;f__Nocardioidaceae;g__Kribbella;s__
OTU_661	0	0	0	0	0	0	0	0	0	0	0	0	0	0	0	0	0	0	0	0	Unknown
OTU_662	7.63388e-05	0.000114508	0	7.63388e-05	0	0	0	0	0	0	0	0.000114508	0	7.63388e-05	0.000572541	0	0	0	0	0	k__Bacteria
OTU_663	0	0	0	0	0	0	0	0	0	0	3.81694e-05	0	0	0	0	0	0	0	0	0	k__Bacteria;p__unidentified_Bacteria;c__Bacteroidia;o__Cytophagales;f__Microscillaceae;g__;s__
OTU_664	0	0	0	0	0	0	0	0	0	0	0	0	0	0	0	0	0	0	0	0	k__Bacteria;p__unidentified_Bacteria;c__unidentified_Bacteria;o__Gemmatimonadales;f__Gemmatimonadaceae;g__;s__
OTU_665	0	0	0	0	0	0	0	0	0	0	0	0.000267186	0	0	0	0	0	0.000190847	0	0	k__Bacteria;p__Fusobacteriota;c__Fusobacteriia;o__Fusobacteriales;f__Fusobacteriaceae;g__Fusobacterium
OTU_666	0	0	0	0	0	0	0	0	0	0	0	0	0	0	0	0	0	0	0	0	k__Bacteria;p__Proteobacteria;c__Gammaproteobacteria;o__Burkholderiales;f__Alcaligenaceae;g__Castellaniella;s__
OTU_667	7.63388e-05	0	0	0	0	3.81694e-05	0	0	0	0	0	0	3.81694e-05	7.63388e-05	3.81694e-05	0.000114508	0.000190847	0	0	0	k__Bacteria;p__Firmicutes;c__Clostridia;o__Lachnospirales;f__Lachnospiraceae
OTU_668	0	3.81694e-05	0	0	0	3.81694e-05	0	0	0	0	0	0	3.81694e-05	0.000114508	0	0	0	0	0.000114508	0	k__Bacteria
OTU_669	0	0	0	0	0	0	0	0	0	0	0	0	0	0	0	0	0	0	0	0.000305355	k__Bacteria;p__Firmicutes;c__Bacilli;o__Bacillales;f__Bacillaceae;g__Anoxybacillus;s__Anoxybacillus_flavithermus
OTU_670	0	0	0	0	0	0	0	0	0	0	7.63388e-05	0	3.81694e-05	0	0	0	0	0	0	0.000267186	k__Bacteria
OTU_671	0	0	3.81694e-05	7.63388e-05	0	7.63388e-05	3.81694e-05	0	0	0	0	0	0	3.81694e-05	7.63388e-05	3.81694e-05	3.81694e-05	0	0	0	k__Bacteria;p__unidentified_Bacteria;c__Clostridia;o__Christensenellales;f__Christensenellaceae;g__;s__
OTU_672	0	0	0	0	0	0	0	0	0	0	0	0	0	0	0	0	0	0	0	0	k__Bacteria;p__Acidobacteriota;c__Blastocatellia;o__Pyrinomonadales;f__Pyrinomonadaceae;g__RB41;s__
OTU_673	0	0	0	0	0	0	0	0	0	0	0	0	0	0	0	0	0	0	0	0	Unknown
OTU_674	0	0	0	0	0	0	0	0	0	0	0	0	0	0	0	0	0	0	0	0	k__Bacteria;p__Firmicutes;c__Clostridia;o__Oscillospirales;f__Ruminococcaceae;g__Candidatus_Soleaferrea;s__
OTU_675	0	0	3.81694e-05	0.000267186	7.63388e-05	3.81694e-05	0	3.81694e-05	0	0	0	0	0	0	0	0	7.63388e-05	0	0	3.81694e-05	k__Bacteria;p__Firmicutes;c__Clostridia;o__Lachnospirales;f__Lachnospiraceae;g__Tyzzerella;s__
OTU_676	0	0	3.81694e-05	3.81694e-05	0	0	0	0	0	0	0	0	0	0	0.000114508	0	0	0	0	0	k__Bacteria;p__Firmicutes;c__Negativicutes;o__Veillonellales-Selenomonadales;f__Veillonellaceae;g__Veillonella
OTU_677	0	0	0	0	3.81694e-05	0	0	0	0	0	0	3.81694e-05	0	0	0	0	7.63388e-05	3.81694e-05	0	7.63388e-05	k__Bacteria;p__Firmicutes;c__Negativicutes;o__Veillonellales-Selenomonadales;f__Veillonellaceae;g__Veillonella;s__Veillonella_atypica
OTU_678	0	0	0	0	0	0	0	0	0	0	0	0	0	0	0	0	0	0	0	0	k__Bacteria;p__Gemmatimonadetes;c__unidentified_Gemmatimonadetes;o__Gemmatimonadales;f__Gemmatimonadaceae;g__Gemmatimonas;s__
OTU_679	0	0	0	0	0	0	0	0	0	0	0	0.000534372	0	0	0	0	0.000305355	0.00103057	0	0	k__Bacteria;p__Fusobacteriota;c__Fusobacteriia;o__Fusobacteriales;f__Fusobacteriaceae;g__Fusobacterium;s__Fusobacterium_mortiferum
OTU_680	0	0	0	0	0	0	0	0	0	0	0	0	3.81694e-05	0	0	0	0	0	0	0	k__Bacteria;p__Firmicutes;c__Clostridia;o__Lachnospirales;f__Lachnospiraceae;g__Cellulosilyticum;s__
OTU_681	0	0	0	0	0	0	0	0	0	0	0	0	0	0	0	0	0	0	0	0	k__Bacteria;p__Firmicutes;c__Negativicutes;o__Veillonellales-Selenomonadales;f__Selenomonadaceae;g__Centipeda;s__
OTU_682	0	0	0	0	0	0	0	0	0	0	0	3.81694e-05	0	0.000114508	0	0.000229016	0	0	0.000534372	0	k__Bacteria;p__Firmicutes;c__Clostridia;o__Monoglobales;f__Monoglobaceae;g__Monoglobus;s__
OTU_683	0	0	0	0	0	0	0	0	7.63388e-05	0	0	0	0	0	0	0	0	0	0	0	k__Bacteria;p__Acidobacteriota;c__Blastocatellia;o__Pyrinomonadales;f__Pyrinomonadaceae;g__RB41;s__
OTU_684	0	0	0	0	0	0	0	0	0	0	0	0	0	0	0	0	0	0	0	0	k__Bacteria;p__Nitrospirota;c__Nitrospira;o__Nitrospirales;f__Nitrospiraceae;g__;s__
OTU_685	0.000954235	3.81694e-05	0.000954235	0.0134356	0.000190847	0.0013741	0.000381694	0	0	0	0	0	0.00221382	0.00248101	0.000916065	0.00118325	0.000801557	0.000381694	0.000305355	0.000763388	k__Bacteria;p__Firmicutes;c__Clostridia;o__Lachnospirales;f__Lachnospiraceae;g__Lachnospiraceae_NK4A136_group;s__Clostridiales_bacterium_CIEAF_020
OTU_686	0	0	0	0	0	0	0	0	0	0	7.63388e-05	0	0	0	0	0	0	0	0	7.63388e-05	k__Bacteria;p__Proteobacteria;c__Alphaproteobacteria;o__Rhizobiales;f__unidentified_Rhizobiales;g__Nordella;s__
OTU_687	0	0	0	7.63388e-05	0	0.000419863	0	0	0	0	0	0	0.000190847	0	0	0	0.000458033	0	3.81694e-05	3.81694e-05	k__Bacteria;p__Firmicutes;c__Bacilli;o__Erysipelotrichales;f__Erysipelotrichaceae;g__[Clostridium]_innocuum_group;s__
OTU_688	0	0	0	0	0	0	0	0	0	0	0	0	0	0	0	0	0	0	0	7.63388e-05	k__Bacteria;p__Firmicutes;c__Clostridia;o__Oscillospirales;f__Ruminococcaceae;g__Ruminococcus;s__Ruminococcus_sp_HUN007
OTU_689	0	0	0	0	0	0	0	0	0	0	0	0	0	0	0	0	0	7.63388e-05	0	7.63388e-05	k__Bacteria;p__Fusobacteriota;c__Fusobacteriia;o__Fusobacteriales;f__Leptotrichiaceae;g__Leptotrichia;s__Leptotrichia_sp_oral_clone_EI013
OTU_690	0	0	0	0	0	0	0	0	0	0	0	0	0	0	0	0	0	0	0	0	k__Bacteria;p__Proteobacteria;c__Gammaproteobacteria;o__Pasteurellales;f__Pasteurellaceae;g__Haemophilus;s__Haemophilus_influenzae
OTU_691	3.81694e-05	0.000267186	0	0	0	0	0.000114508	0	0	0	3.81694e-05	0	0	0	0.000152678	0	0	0	7.63388e-05	0	k__Bacteria;p__unidentified_Bacteria;c__Clostridia;o__Lachnospirales;f__Lachnospiraceae
OTU_692	0	0	0	0	0	0	0	0	0	0	0	0	0	0	0	0	0	0	0	0	k__Bacteria;p__Bacteroidota;c__Bacteroidia;o__Chitinophagales;f__Chitinophagaceae;g__Flavisolibacter;s__Flavisolibacter_tropicus
OTU_693	0	0	0	0	0	0	0	0	0	0	0	0	0	0	0	0	0	0	0	0	k__Bacteria;p__Bacteroidota;c__Bacteroidia;o__Flavobacteriales;f__Weeksellaceae;g__Chryseobacterium
OTU_694	0	0	0	0	0	0	0	0	0	0	0	0	0	0	0	0	0	0	0	0	k__Bacteria
OTU_695	0	0	0	0	0	0	0	0	0	0	0.000114508	0	0	0	0	0	0	0	0	3.81694e-05	k__Bacteria;p__Proteobacteria;c__Gammaproteobacteria;o__Burkholderiales;f__Nitrosomonadaceae;g__MND1;s__
OTU_696	0	0	0	0	0	7.63388e-05	0	0	0	0	0	0	0.000267186	0	0	0	0	0	0	0	k__Bacteria;p__Acidobacteriota;c__Holophagae;o__Subgroup_7;f__;g__;s__
OTU_697	0	0	0	0	0	0	0	0	0	0.000114508	0	0	0	0	0	0	0	0	0	0	k__Bacteria;p__Actinobacteriota;c__Actinobacteria;o__Micrococcales;f__Micrococcaceae;g__Nesterenkonia
OTU_698	0	0	0	0	0	0	0	0	0	3.81694e-05	0	0	0	0	0	0	0	0	0	0	k__Bacteria;p__Gemmatimonadetes;c__unidentified_Gemmatimonadetes;o__Gemmatimonadales;f__Gemmatimonadaceae;g__Gemmatimonas;s__
OTU_699	0	0	0	0	0	0	0	7.63388e-05	7.63388e-05	3.81694e-05	0.000114508	0.000496202	0	0	0	3.81694e-05	0	0	0	7.63388e-05	k__Bacteria;p__Proteobacteria;c__Alphaproteobacteria;o__Sphingomonadales;f__Sphingomonadaceae;g__Sphingomonas;s__Sphingomonas_faeni
OTU_700	0	0	0	0	0	0	0	0	0	0	0	0	0	0	0	0	0	0	0	0	k__Bacteria
OTU_701	0	0	0	3.81694e-05	0	0	0	0	0	0	0	7.63388e-05	0	0	0	0	0	3.81694e-05	0	0	k__Bacteria;p__Firmicutes;c__Clostridia;o__Oscillospirales;f__[Eubacterium]_coprostanoligenes_group;g__;s__
OTU_702	0	0	0	0	0	0	0	0	0	0	0	0	0	0	0	0	0	0	0	0	k__Bacteria;p__Proteobacteria;c__Gammaproteobacteria;o__Burkholderiales;f__Neisseriaceae;g__Neisseria;s__Neisseria_oralis
OTU_703	0	0	0	0	3.81694e-05	0	3.81694e-05	0	0	0	0	0	0	3.81694e-05	0.000114508	0	0	0	0	0	k__Bacteria;p__Firmicutes;c__Clostridia;o__Lachnospirales;f__Lachnospiraceae;g__Lachnospiraceae_NK4A136_group;s__
OTU_704	0	0	0	0	0	0	0	0	0	0	0	7.63388e-05	0	0	0	0	0	0	0	0	k__Bacteria;p__Proteobacteria;c__Alphaproteobacteria;o__Rhizobiales;f__Beijerinckiaceae;g__Microvirga
OTU_705	0	0	0	0.000305355	3.81694e-05	0	0	0	3.81694e-05	3.81694e-05	0	0	3.81694e-05	0	0	0	0.000190847	0	0	0	k__Bacteria;p__unidentified_Bacteria;c__Clostridia;o__;f__;g__;s__
OTU_706	0	7.63388e-05	0	0	0.000114508	0	3.81694e-05	0	0	0	0	0	0	0	0	0	0	0	0.000152678	0.000152678	k__Bacteria;p__Firmicutes;c__Clostridia;o__Oscillospirales;f__Ruminococcaceae;g__Paludicola;s__
OTU_707	0	0	3.81694e-05	0	0	0	0	0	0	0	0	0	0	0	0	0	0	0	0	0	k__Bacteria;p__Proteobacteria;c__Alphaproteobacteria;o__Rhizobiales;f__Beijerinckiaceae;g__Methylobacterium-Methylorubrum;s__Methylobacterium_hispanicum
OTU_708	0	0	0	0	0.000267186	3.81694e-05	0	0	0	0	0	0	0.000152678	0	0	0	0.000267186	0	0	0	k__Bacteria;p__Firmicutes;c__Clostridia;o__Peptostreptococcales-Tissierellales;f__Peptostreptococcaceae;g__Paeniclostridium
OTU_709	0	0	0	0	0	0	0	0	0	0	0	0	0	0	0	0	0	0	0	0	k__Bacteria;p__Actinobacteriota;c__Actinobacteria;o__Actinomycetales;f__Actinomycetaceae;g__Actinomyces
OTU_710	0	0	0	0	0	0	0	0	0	3.81694e-05	0	0	3.81694e-05	0	0	0	0	0	0	0	k__Bacteria;p__Chloroflexi;c__TK10;o__;f__;g__;s__
OTU_711	0	0	0	0	0	0	0	0	0	0	0	3.81694e-05	0	0	0	0	0	7.63388e-05	0	0	k__Bacteria;p__Firmicutes;c__Clostridia;o__Christensenellales;f__Christensenellaceae;g__Christensenellaceae_R-7_group
OTU_712	0	0	0	0	0	3.81694e-05	0	7.63388e-05	7.63388e-05	3.81694e-05	0.000152678	0	0.000114508	0	0	0	0	0	0	7.63388e-05	k__Bacteria
OTU_713	0	0	0	0	0	0	0	0	0	0	0	7.63388e-05	7.63388e-05	0	0	0	0	0	0	0	k__Bacteria;p__Acidobacteriota;c__Acidobacteriae;o__Bryobacterales;f__Bryobacteraceae;g__Bryobacter;s__Acidobacteria_bacterium_WX72
OTU_714	0	0	0	0	0	0	0	0	0	0	0	0	0	0	0	0	0	0	0	0	k__Bacteria;p__Acidobacteriota;c__Acidobacteriae;o__Subgroup_13;f__;g__;s__
OTU_715	0	0	0	0.000114508	0	0	3.81694e-05	0	0	0	0	0	0	3.81694e-05	0	3.81694e-05	0.00156495	0	0	7.63388e-05	k__Bacteria;p__Bacteroidota;c__Bacteroidia;o__Bacteroidales;f__Barnesiellaceae;g__Barnesiella;s__
OTU_716	0	0	0	0	0	0	0	0	0	0	0	0	0	0	0	0	0	0	0	0	k__Bacteria;p__Gemmatimonadetes;c__unidentified_Gemmatimonadetes;o__Gemmatimonadales;f__Gemmatimonadaceae;g__Gemmatimonas;s__
OTU_717	0	0	0	0	0	0	0	0	0	0	0	0	0	0	0	0	0	0	0	0	Unknown
OTU_718	0	0	0	0	0	0	0	0	0	0	0	0	0	0	0	0	0	0	0	0	k__Bacteria;p__unidentified_Bacteria;c__Alphaproteobacteria
OTU_719	0	0	0	0	0	0	0	0	0	0	0	0	0	0	0	0	0.00305355	0	0	0	k__Bacteria;p__Firmicutes;c__Clostridia;o__Lachnospirales;f__Lachnospiraceae;g__[Eubacterium]_eligens_group;s__
OTU_720	0	0	0	0	0	0	0	0	0	0	0	0	0	0	0	0	0	0	0	0	k__Bacteria;p__Acidobacteriota;c__Vicinamibacteria;o__Vicinamibacterales;f__;g__;s__
OTU_721	0	0	0	0	0	3.81694e-05	0	7.63388e-05	7.63388e-05	0	0.000152678	0.000229016	7.63388e-05	0	0	0	0	0	0	3.81694e-05	k__Bacteria;p__Proteobacteria;c__Alphaproteobacteria;o__Rhizobiales;f__Devosiaceae;g__Devosia;s__
OTU_722	0	0	0	0	0	0	0	0	0	0	0	0	0	0	0	0	0	0	0	7.63388e-05	k__Bacteria
OTU_723	0	0	0	0	0	0.000114508	0	0.000152678	0	3.81694e-05	7.63388e-05	3.81694e-05	0	0	0	0	0	0	0	0	k__Bacteria;p__unidentified_Bacteria;c__Alphaproteobacteria;o__Rhizobiales;f__Xanthobacteraceae;g__;s__
OTU_724	0	0	0	0	0	0	0	0	0	3.81694e-05	0	0	0	0	0	0	0	0	0	0	k__Bacteria;p__Proteobacteria;c__Gammaproteobacteria;o__Burkholderiales;f__Nitrosomonadaceae;g__Ellin6067;s__
OTU_725	0	0	0	0	0	0	0	0	0	0	0	0	0	0	0	0	0	0	0	0	k__Bacteria;p__unidentified_Bacteria;c__Acidobacteriae;o__Acidobacteriales
OTU_726	0	0	0.000152678	0	0	0.000229016	0	0	7.63388e-05	0	0	0	0.000229016	0.000152678	0	0	0.000229016	0	0	0	k__Bacteria;p__Firmicutes;c__Clostridia;o__Lachnospirales;f__Lachnospiraceae;g__Lachnospiraceae_UCG-001;s__
OTU_727	0	0	0	0	0	0	0	0	0	0	0	0	0	0	0	0	3.81694e-05	0.000152678	0	0	k__Bacteria;p__Firmicutes;c__Bacilli;o__Lactobacillales;f__Streptococcaceae;g__Streptococcus
OTU_728	0	0	0	0	0	0	0	0	0	0	0	0	3.81694e-05	0	0	0	0	0	0	0	k__Bacteria;p__Myxococcota;c__Polyangia;o__Haliangiales;f__Haliangiaceae;g__Haliangium;s__
OTU_729	0.000152678	0	0	3.81694e-05	0	0	3.81694e-05	0	0	0	0	3.81694e-05	0	0	0.000229016	0	0	0	0	0	k__Bacteria;p__unidentified_Bacteria;c__Clostridia;o__;f__;g__;s__
OTU_730	0	0	0	0	0	0	0	0	0	0	0	0	0	0	0	0	0	0	0	0	k__Bacteria;p__Actinobacteriota;c__Actinobacteria;o__Propionibacteriales;f__Propionibacteriaceae;g__Tessaracoccus;s__
OTU_731	0	0	0	0	0	0	0	0	0	0	0	0	0	0	0	0	0	0	0	0	k__Bacteria;p__Firmicutes;c__Clostridia;o__Christensenellales;f__Christensenellaceae;g__Christensenellaceae_R-7_group
OTU_732	0	0	0	0	0	0	0	0	0	0	0	0	0	0	0	0	0	0	0	0	k__Bacteria
OTU_733	0	7.63388e-05	7.63388e-05	7.63388e-05	0	0	7.63388e-05	0	0	0	0	0	3.81694e-05	0	3.81694e-05	0	3.81694e-05	0	7.63388e-05	0	k__Bacteria;p__Firmicutes;c__Clostridia
OTU_734	0	0	0	0	0	0	0	0	0	0	0	0	0	0	0	0	0	0	0	0	k__Bacteria;p__Acidobacteriota;c__Blastocatellia;o__Pyrinomonadales;f__Pyrinomonadaceae;g__RB41;s__
OTU_735	0.00061071	0	0	0.000381694	0	7.63388e-05	0	0	0	0	0	0	0	0.000152678	0.000190847	7.63388e-05	0	0	0.000801557	0	k__Bacteria;p__Firmicutes;c__Clostridia;o__Clostridia_UCG-014;f__;g__;s__
OTU_736	0	0	0	0	0	3.81694e-05	0	3.81694e-05	3.81694e-05	0	0	0	0	0	0	0	0	0	0	0	k__Bacteria;p__Proteobacteria;c__Gammaproteobacteria;o__Xanthomonadales;f__Xanthomonadaceae;g__Lysobacter
OTU_737	0	0	0	3.81694e-05	0	0	0	0	0	0	3.81694e-05	0	0	0	0	0	0.00133593	0	0	0	k__Bacteria;p__Firmicutes;c__Clostridia;o__Lachnospirales;f__Lachnospiraceae;g__Lachnospira;s__
OTU_738	0	0	0	0	0	0	0	0	0	0	0	0	0	0	0	0	0	3.81694e-05	0	0.000267186	k__Bacteria;p__Chloroflexi;c__Anaerolineae;o__SBR1031;f__unidentified_SBR1031;g__unidentified_SBR1031
OTU_739	0	0	0	0	0	0	0	0	0	0	0	0	0	0	0	0	0	0	0	0	k__Bacteria;p__Firmicutes;c__Bacilli;o__RF39;f__;g__;s__
OTU_740	0	0	0	0	0	0	0	0	0	0	0	0	0	0	0	0	0	0	0	0	k__Bacteria;p__Proteobacteria;c__Gammaproteobacteria;o__Burkholderiales;f__SC-I-84;g__;s__
OTU_741	0	0	0	0	0	0	0	0	0	0	0	0	0	0	0	0	0	0	0	0	k__Bacteria;p__Firmicutes;c__Bacilli;o__Lactobacillales;f__Lactobacillaceae;g__Lactobacillus;s__Lactobacillus_ruminis
OTU_742	0	0	0	0	0	0	0	0	0	0	0	0	0	0	0	0	0	0	0	0	k__Bacteria
OTU_743	0	0	0	0	0	0	0	0	0	3.81694e-05	0	0	0	0	0	0	0	0	0	0	k__Bacteria;p__unidentified_Bacteria;c__Thermoleophilia;o__Gaiellales;f__;g__;s__
OTU_744	0	0	0	0.000152678	0	0	0	0	0	0	0	0	0	0	0	0	0.000381694	0	0	0	k__Bacteria;p__Firmicutes;c__Negativicutes;o__Acidaminococcales;f__Acidaminococcaceae;g__Phascolarctobacterium;s__
OTU_745	0	0	0	0	0	0	0	0	0	0	0	0	0	0	0	0	0	0	0	0	k__Bacteria;p__Acidobacteriota;c__Subgroup_5;o__;f__;g__;s__
OTU_746	0	0	0	0.000534372	3.81694e-05	0	0	0	0	0	0	3.81694e-05	0	0	0	0	0	0	0	0	k__Bacteria;p__Proteobacteria;c__Gammaproteobacteria;o__Burkholderiales;f__Comamonadaceae;g__Comamonas;s__Comamonas_testosteroni
OTU_747	0	0	0	0	0	0	0	0	0	0	0	0	0	0	0	0	0	0	0	0	k__Bacteria;p__WPS-2;c__;o__;f__;g__;s__
OTU_748	0	0	0	0.000114508	3.81694e-05	3.81694e-05	0	3.81694e-05	0	0	0	3.81694e-05	7.63388e-05	0	0	0	0	0	0	0	k__Bacteria;p__Proteobacteria;c__Alphaproteobacteria;o__Rhizobiales;f__Rhizobiaceae
OTU_749	0	0	0	0	0	0	0	0	3.81694e-05	0	0	0	0	0	0	0	0	0	0	0	k__Bacteria;p__Acidobacteriota;c__Acidobacteriae;o__Solibacterales;f__Solibacteraceae;g__Candidatus_Solibacter;s__
OTU_750	0.000763388	0.000877896	0	0	0	0	0	0	0	0	0	0	0	7.63388e-05	3.81694e-05	0	0	0	0	3.81694e-05	k__Bacteria;p__Deinococcota;c__Deinococci;o__Thermales;f__Thermaceae;g__Thermus;s__Thermus_thermophilus
OTU_751	0	0	0	0	0	0	0	0	0	0	0	0	0	0	0	0	0	0	0	0.000839727	k__Bacteria;p__unidentified_Bacteria;c__Anaerolineae;o__Anaerolineales;f__Anaerolineaceae;g__;s__
OTU_752	0	0	0	0	0	0	0	0	0	0	0	0	0	0	0	0	0	0	0	0	k__Bacteria;p__Chloroflexi;c__KD4-96;o__;f__;g__;s__
OTU_753	0	0	0	0	0	0	0	0	0	0	0	0	0	0	0	0	0	0	0	0	k__Bacteria;p__Bacteroidota;c__Bacteroidia;o__Bacteroidales;f__Prevotellaceae;g__Prevotella;s__Prevotella_nigrescens
OTU_754	7.63388e-05	7.63388e-05	0	0	0	0	0.000114508	0	0	0	0	0	0	0.000114508	7.63388e-05	0	0	0	0	0	k__Bacteria;p__Firmicutes;c__Bacilli;o__Erysipelotrichales;f__Erysipelotrichaceae
OTU_755	0	0	0	0	0	0	0	0	0	0	0	0	3.81694e-05	0	0	0	0	0	0	0	k__Bacteria;p__Gemmatimonadota;c__AKAU4049;o__;f__;g__;s__
OTU_756	0	0	0	0	0	0	0	0	0	0	0	0	0	0	0	0	0	0	0	0	k__Bacteria;p__unidentified_Bacteria;c__Gammaproteobacteria;o__Diplorickettsiales;f__Diplorickettsiaceae;g__;s__
OTU_757	0	0	0	0	0	0	0	7.63388e-05	0	0	0	0	0	0	0	0	0	0	0	0.000152678	k__Bacteria;p__Nitrospirota;c__Nitrospira;o__Nitrospirales;f__Nitrospiraceae;g__;s__
OTU_758	0	0	0	0	0	0	0	0	0	0	0	0	0	0	0	0	0	0	0	0	k__Bacteria;p__Proteobacteria;c__Gammaproteobacteria;o__Burkholderiales;f__Burkholderiaceae;g__Limnobacter;s__Limnobacter_litoralis
OTU_759	0	0	0	0	0	7.63388e-05	0	7.63388e-05	0.000152678	3.81694e-05	0.000229016	0	7.63388e-05	0	0	0	0	0	0	0	k__Bacteria;p__Proteobacteria;c__Alphaproteobacteria;o__Reyranellales;f__Reyranellaceae;g__Reyranella;s__
OTU_760	0	7.63388e-05	0	3.81694e-05	0	0.000114508	0	0	0	3.81694e-05	0	0	7.63388e-05	3.81694e-05	3.81694e-05	0	0	0	0	0	k__Bacteria;p__Firmicutes;c__Clostridia;o__Lachnospirales;f__Lachnospiraceae;g__Lachnospiraceae_FCS020_group;s__
OTU_761	0	0	0	0	0	0	0	0	0	0	0	0	0	0	0	0	0	0	0	0	k__Bacteria;p__Verrucomicrobiota;c__Verrucomicrobiae;o__Pedosphaerales;f__Pedosphaeraceae;g__;s__
OTU_762	0	0	0	0	0	0	0	0	0	3.81694e-05	0	0	7.63388e-05	0	0	0	0	0	0	0	k__Bacteria;p__Bacteroidota;c__Bacteroidia;o__Cytophagales;f__Microscillaceae;g__Ohtaekwangia
OTU_763	0	0	0	0	0	0	0	0	0	0	0	0	0	0	0	0	0	0	0	0	k__Bacteria;p__Bacteroidota;c__Bacteroidia;o__Bacteroidales;f__Prevotellaceae;g__Prevotella;s__Prevotella_micans
OTU_764	0	0	0	0	0	0	0	0	0	0	0	0	0	0	0	0	0	0	0	0	k__Bacteria;p__Bacteroidota;c__Bacteroidia;o__Bacteroidales;f__Prevotellaceae;g__Prevotella;s__Prevotella_oris
OTU_765	0	0	0	0	0	0	0	0	3.81694e-05	0	0	3.81694e-05	0	0	0	0	0	0	0	0	k__Bacteria;p__Proteobacteria;c__Alphaproteobacteria;o__Caulobacterales;f__Caulobacteraceae;g__Brevundimonas;s__Brevundimonas_diminuta
OTU_766	0.000343525	0.000725219	0.000190847	0.000152678	0.000801557	0	0.000572541	0.000458033	0.000114508	7.63388e-05	0.000267186	0	0	0.000381694	0.000725219	0.000534372	0	3.81694e-05	0.000343525	0	k__Bacteria;p__Firmicutes;c__Bacilli;o__Lactobacillales;f__Lactobacillaceae;g__Lactobacillus
OTU_767	0	0	0	0	0	0	3.81694e-05	0	0	0	0	0	0	7.63388e-05	0	7.63388e-05	0	0	0	0	k__Bacteria;p__Firmicutes;c__Clostridia;o__Clostridia_UCG-014;f__;g__;s__
OTU_768	0	0	0	0	0	0	0	0.000190847	0	3.81694e-05	7.63388e-05	0	0	0	0	0	0	0	0	0.000725219	k__Bacteria;p__Chloroflexi;c__Gitt-GS-136;o__;f__;g__;s__
OTU_769	0	0	0	0	0	0	0	0.000152678	0.000190847	0.000152678	7.63388e-05	0	0.000419863	0	0	0	0	0	0	0	k__Bacteria;p__Proteobacteria;c__Gammaproteobacteria;o__Burkholderiales;f__Nitrosomonadaceae;g__MND1;s__
OTU_770	0	0	0	0	0	0	0	0	0	0	0	0	0	0	0	0	0	0	0	0	k__Bacteria;p__Proteobacteria;c__Gammaproteobacteria;o__Xanthomonadales;f__Rhodanobacteraceae;g__Rhodanobacter
OTU_771	0	0	0	0	0	0.000839727	0	0	0	0	0	0	0.000229016	0	0	0	3.81694e-05	0	0	0	k__Bacteria;p__Nitrospirota;c__Nitrospira;o__Nitrospirales;f__Nitrospiraceae
OTU_772	0	0	0	0	0	0	0	0	0	0	0	0	0	0	0	0	0	0	0	0	k__Bacteria;p__Myxococcota;c__Polyangia;o__Haliangiales;f__Haliangiaceae;g__Haliangium;s__
OTU_773	0	0	0	0	0	0	0	0	0	0	0	0	0	0	0	0	0	0	0	0	k__Bacteria;p__Firmicutes;c__Clostridia;o__Lachnospirales;f__Lachnospiraceae
OTU_774	0	0	0	0.000114508	0.000419863	0	0	0	0	0	0	0.000496202	0	0	0	0	0	0.000343525	0	0	k__Bacteria;p__Synergistota;c__Synergistia;o__Synergistales;f__Synergistaceae;g__Cloacibacillus;s__Cloacibacillus_porcorum
OTU_775	0	0	0	0	0	0	0	7.63388e-05	0	0	3.81694e-05	0	0	0	0	0	0	0	0	0	k__Bacteria;p__unidentified_Bacteria;c__unidentified_Bacteria;o__Gemmatimonadales;f__Gemmatimonadaceae;g__;s__
OTU_776	0	0	0	0	0	0	0	0	0	0	0	0	0	0	0	0	0.000190847	0	0	0.000114508	k__Bacteria;p__Firmicutes;c__Clostridia;o__Oscillospirales;f__Butyricicoccaceae;g__Butyricicoccus;s__
OTU_777	7.63388e-05	3.81694e-05	0	0.000114508	0	0.000114508	3.81694e-05	0	0	0	0	0	0	0	3.81694e-05	0	3.81694e-05	0	0.000152678	0	k__Bacteria;p__Firmicutes;c__Clostridia;o__Clostridia_UCG-014;f__;g__;s__
OTU_778	7.63388e-05	0.000114508	3.81694e-05	0	0	0.000114508	3.81694e-05	0	0	0	0	0	0	7.63388e-05	0.000114508	0	0	0	0	0	k__Bacteria;p__Firmicutes;c__Clostridia;o__Clostridia_vadinBB60_group;f__;g__;s__
OTU_779	0	0	0	0	0	0	0	0	0	0	0	0	0	0	0	0	0	0	0	0	k__Bacteria;p__Gemmatimonadetes;c__unidentified_Gemmatimonadetes;o__Gemmatimonadales;f__Gemmatimonadaceae;g__Gemmatimonas;s__
OTU_780	0	0	0	0.000305355	0	0	0	0	0	0	0	0.000190847	0	0	0	0	0	0.000381694	0	0	k__Bacteria;p__Bacteroidota;c__Bacteroidia;o__Bacteroidales;f__Prevotellaceae
OTU_781	0	0	0	0	0	0	0	0	0	0	0	0	0	0	0	0	0	0	0	0	k__Bacteria;p__unidentified_Bacteria;c__Blastocatellia;o__Blastocatellales;f__Blastocatellaceae;g__;s__
OTU_782	0	0	0	0	0	0	0	0	0	0	0	3.81694e-05	0.000114508	0	0	0	0	0	0	0	k__Bacteria;p__Proteobacteria;c__Alphaproteobacteria;o__Sphingomonadales;f__Sphingomonadaceae;g__Porphyrobacter;s__
OTU_783	0	0	0	0	0	0	0	0	0	0	0	0	0	0	0	0	7.63388e-05	0	0	0	k__Bacteria;p__Firmicutes;c__Clostridia;o__Lachnospirales;f__Lachnospiraceae;g__Coprococcus
OTU_784	0.000114508	0.000152678	3.81694e-05	0.000114508	0.000190847	0	0.000114508	0	0	0	0	7.63388e-05	0.000114508	0.00164128	0	0	0	0.000152678	0.000190847	0	k__Bacteria;p__Firmicutes;c__Clostridia;o__Lachnospirales;f__Lachnospiraceae
OTU_785	0	0	0	0	0	7.63388e-05	0	0	0	0	0	0	0	0	0	0	0	0	0.000114508	0	k__Bacteria;p__Firmicutes;c__Clostridia;o__Oscillospirales;f__Ruminococcaceae;g__Harryflintia;s__
OTU_786	0	0	0	0	0.000114508	3.81694e-05	0	0	0	0	0	0	0.000763388	0	0	0	0	0	0	0	k__Bacteria;p__unidentified_Bacteria;c__unidentified_Bacteria;o__Gemmatimonadales;f__Gemmatimonadaceae;g__unidentified_Gemmatimonadaceae;s__Gemmatimonadetes_bacterium_SCN_70-22
OTU_787	0	0	0	0	0	0	0	0	0	0	0	0	0	0	0	0	0	0	0	0	k__Bacteria;p__Bacteroidota;c__Bacteroidia;o__Chitinophagales;f__Chitinophagaceae;g__Parafilimonas;s__
OTU_788	0	0	0	0	0	0	0	0	0	0	0	7.63388e-05	3.81694e-05	0	3.81694e-05	0	7.63388e-05	0	0	0	k__Bacteria;p__Firmicutes;c__Clostridia;o__Monoglobales;f__Monoglobaceae;g__Monoglobus;s__
OTU_789	0	0	0	0	7.63388e-05	0	0	0	0	0	0	0	0	0	0	0	0	0	0	0	k__Bacteria;p__Bacteroidota;c__Bacteroidia;o__Bacteroidales;f__Porphyromonadaceae;g__Porphyromonas;s__
OTU_790	0	0	0	0	0	0	0	0	0	0	0	0	0	0	0	0	0	0	0	0	k__Bacteria;p__Firmicutes;c__Clostridia;o__Oscillospirales;f__Ruminococcaceae;g__Ruminococcus;s__Ruminococcaceae_bacterium_NK4B32
OTU_791	0	0	0	0	0	0	0	0	0	0	0	0	0	0	0	0	0	0	0	0	k__Bacteria;p__Acidobacteriota;c__Holophagae;o__Subgroup_7;f__;g__;s__
OTU_792	0	0	0	0	0	0	0	0	0	0	0	0	0	0	0	0	0	0	0	0	k__Bacteria;p__Bacteroidota;c__Bacteroidia;o__Chitinophagales;f__Chitinophagaceae;g__UTBCD1;s__
OTU_793	0	0.000114508	0	0	0	0	7.63388e-05	0	0	0	3.81694e-05	0	0	3.81694e-05	0	0	0	0	0	0	k__Bacteria;p__Firmicutes;c__Bacilli;o__RF39;f__;g__;s__
OTU_794	0	0	0	0	0	0	0	0	0	0	0	0	0	0	0	0	0	0	0	0	k__Bacteria;p__Chloroflexi;c__Ktedonobacteria;o__C0119;f__;g__;s__
OTU_795	0	0	0	0	0	0	0	0	0	0	0	0	0	0.000229016	0.000114508	7.63388e-05	0	0	0.000267186	0	k__Bacteria;p__Firmicutes;c__Clostridia;o__Clostridia_UCG-014;f__;g__;s__
OTU_796	0	0	0	0	0	0	0	0	0	0	0	0	0	0	0	0	0	0	0	0	k__Bacteria;p__Firmicutes;c__Bacilli;o__RF39;f__;g__;s__
OTU_797	0	0	0	0.000114508	0.000229016	0	0	0	0	0	0	0.000229016	0	0	0	0	0	0.000343525	0	0	k__Bacteria;p__Bacteroidota;c__Bacteroidia;o__Bacteroidales;f__Rikenellaceae;g__Rikenellaceae_RC9_gut_group;s__
OTU_798	0	7.63388e-05	0	0	0	0	0	0	0	0	0	0	0	0	0	0.000114508	0	0	0.000152678	0	k__Bacteria;p__Firmicutes;c__Clostridia;o__Lachnospirales;f__Lachnospiraceae
OTU_799	0	0	0	0	0	0	0	0	0	0	0	0	0	0	0	0	0	0	0	3.81694e-05	k__Bacteria;p__unidentified_Bacteria;c__Vicinamibacteria;o__Vicinamibacterales;f__;g__;s__
OTU_800	0	0	0	0	0	0	0	0	0	0	0	7.63388e-05	0	0	0	0	0	0	0	0	k__Bacteria;p__Chloroflexi;c__Chloroflexia;o__Thermomicrobiales;f__JG30-KF-CM45;g__;s__
OTU_801	0	0	0	0	3.81694e-05	0	0	0	0	0	0	0.000114508	0	0	0	0	0	7.63388e-05	0	0	k__Bacteria;p__Firmicutes;c__Clostridia;o__Oscillospirales;f__Oscillospiraceae;g__NK4A214_group;s__
OTU_802	0	0	0.000114508	0	0	3.81694e-05	0	0	0	0	0	0	0	0	0	0	7.63388e-05	7.63388e-05	0	0	k__Bacteria;p__Actinobacteriota;c__Coriobacteriia;o__Coriobacteriales;f__Eggerthellaceae;g__Gordonibacter;s__
OTU_803	0	0	0	0	0	0	0	3.81694e-05	3.81694e-05	7.63388e-05	7.63388e-05	0	7.63388e-05	0	0	0	0	0	0	0	k__Bacteria;p__unidentified_Bacteria;c__unidentified_Bacteria;o__Gemmatimonadales;f__Gemmatimonadaceae;g__;s__
OTU_804	0	0	0	0	0	0	0	0.000343525	0.000190847	0.00061071	0.000534372	0.000152678	0	0	0	0	0	0	0	0.000343525	k__Bacteria;p__Actinobacteriota;c__Acidimicrobiia;o__IMCC26256;f__;g__;s__
OTU_805	0	0	0	0	0	0	0	3.81694e-05	0	0	0	0	0	0	0	0	0	0	0	0	k__Bacteria;p__Proteobacteria;c__Gammaproteobacteria;o__Diplorickettsiales;f__Diplorickettsiaceae;g__Aquicella;s__
OTU_806	0	0	0	0	0	0	0	0	3.81694e-05	0	7.63388e-05	0.000496202	0	0	0	0	0	0	0	0	k__Bacteria;p__Proteobacteria;c__Alphaproteobacteria;o__Rhizobiales;f__Beijerinckiaceae;g__Microvirga;s__
OTU_807	0	0	0	0	3.81694e-05	0	0	0	0	0	0	0	0	0	0	0	0	3.81694e-05	0	0	k__Bacteria;p__Firmicutes;c__Clostridia;o__Oscillospirales;f__Oscillospiraceae;g__UCG-005;s__
OTU_808	0	0	0	0	0	0	0	0	0	0	0	0	0.000954235	0	0	0	0	0	0	0	k__Bacteria;p__Bacteroidota;c__Bacteroidia;o__Flavobacteriales;f__Flavobacteriaceae;g__Robiginitalea;s__
OTU_809	0	0	0	0	0	0	0	0	0	0	0	0	0	0	0	0	0	0	0	0	k__Bacteria;p__Firmicutes;c__Bacilli;o__Paenibacillales;f__Paenibacillaceae;g__Cohnella;s__
OTU_810	0	0	0	0	3.81694e-05	0	0	0	0	0	0	0	0	0	0	0	0	3.81694e-05	0	0	k__Bacteria;p__unidentified_Bacteria;c__Bacilli;o__Erysipelotrichales;f__Erysipelotrichaceae;g__;s__
OTU_811	0	0	0	0	0	0	0	0	0	0	0	0	0	0	0	0	0	0	0	0	k__Bacteria;p__Chloroflexi;c__Chloroflexia;o__Thermomicrobiales;f__JG30-KF-CM45;g__;s__
OTU_812	0.000152678	0.000419863	0	0	0	0	7.63388e-05	0	0	0	0	0	0	0.000114508	7.63388e-05	3.81694e-05	0	0	0.000152678	0	k__Bacteria;p__Bacteroidota;c__Bacteroidia;o__Bacteroidales;f__Marinifilaceae;g__Odoribacter;s__
OTU_813	0	3.81694e-05	0.000267186	0	3.81694e-05	7.63388e-05	0	0	0	0	0	0	0.000152678	0	0	0	0	0	0	0	k__Bacteria;p__Firmicutes;c__Clostridia;o__Christensenellales;f__Christensenellaceae;g__Christensenellaceae_R-7_group;s__bacterium_YE57
OTU_814	0	0	0	0	0	0	0	0	0	0	0	0	0	0	0	0	0	0	0	0	k__Bacteria;p__Chloroflexi;c__Ktedonobacteria;o__C0119;f__;g__;s__
OTU_815	3.81694e-05	0.000267186	3.81694e-05	0	0	7.63388e-05	0	0	0	0	0	0	0	7.63388e-05	7.63388e-05	0	0	0	0.000152678	0	k__Bacteria;p__Firmicutes;c__Clostridia;o__Lachnospirales;f__Lachnospiraceae;g__Lachnospiraceae_UCG-001;s__
OTU_816	0	0	0	0	0	0	0	0	0	0	0	0	0	0	0	0	0	0	0	0	k__Bacteria;p__Acidobacteriota;c__Acidobacteriae;o__Solibacterales;f__Solibacteraceae;g__Candidatus_Solibacter;s__
OTU_817	0	0	0	0.000114508	3.81694e-05	0	0	0	0	0	0	0	0	0	0	0	0.00061071	0	0	0.000152678	k__Bacteria;p__Firmicutes;c__Clostridia;o__Christensenellales;f__Christensenellaceae;g__Christensenellaceae_R-7_group;s__
OTU_818	0	0	0	0	0	0	0	0	0	0	0	0	0	0	0	0	0	0	0	0	k__Bacteria;p__Bdellovibrionota;c__Bdellovibrionia;o__Bdellovibrionales;f__Bdellovibrionaceae;g__;s__
OTU_819	0	0	0	0	3.81694e-05	0	0	0	0	0	0	0	0	0	0	0	0	0	0	0	k__Bacteria;p__Firmicutes;c__Bacilli;o__RF39;f__;g__;s__
OTU_820	0	0	0	0	0	0	0	3.81694e-05	3.81694e-05	0	3.81694e-05	0	0	0	0	0	0	0	0	0	k__Bacteria;p__unidentified_Bacteria;c__Acidimicrobiia;o__Microtrichales;f__;g__;s__
OTU_821	0	0	0	0	0	0.000190847	0	0	0	0	0	0	0.000534372	0	0	0	7.63388e-05	0	0	0	k__Bacteria;p__Firmicutes;c__Clostridia;o__Oscillospirales;f__Ruminococcaceae;g__Paludicola;s__
OTU_822	0	0	0	0	0	0	0	0	0	0	0	0	0	0	0	0	0	0	0	0	k__Bacteria;p__Chloroflexi;c__Chloroflexia;o__Thermomicrobiales;f__Thermomicrobiaceae;g__Nitrolancea;s__
OTU_823	0	0	0	3.81694e-05	0	0	0.000114508	0	0	0	0	0	0	0	0	0.000229016	0	0	0.000114508	0	k__Bacteria;p__Firmicutes;c__Bacilli;o__RF39;f__;g__;s__
OTU_824	0	0	0	0	0	0	0	0	0	0	0	0	0	0	0	0	0	0	0	0	k__Bacteria;p__Firmicutes;c__Clostridia;o__Oscillospirales;f__UCG-010;g__;s__
OTU_825	0	0	0	7.63388e-05	0.000114508	0	0	0	0	0	0	0.000114508	0	0	0	0	0	0.000152678	0	3.81694e-05	k__Bacteria;p__Firmicutes;c__Clostridia;o__Christensenellales;f__Christensenellaceae;g__Christensenellaceae_R-7_group;s__
OTU_826	0	0	0	0	0	3.81694e-05	0	0	0	0	0	0	0.0013741	0	0	0	0	0	0	0	k__Bacteria;p__Bacteroidota;c__Bacteroidia;o__Bacteroidales;f__Bacteroidetes_vadinHA17;g__;s__
OTU_827	0	0	0	0	0	0	0	0	0	0	0	0	0	0	0	0	0	0	0	0	k__Bacteria;p__Verrucomicrobiota;c__Verrucomicrobiae;o__Chthoniobacterales;f__Chthoniobacteraceae;g__Candidatus_Udaeobacter;s__
OTU_828	0	0	0	0	0	0	0	0	0	0	0	0	0	0	0	0	0	0	0	0	k__Bacteria;p__unidentified_Bacteria;c__Alphaproteobacteria;o__Micropepsales;f__Micropepsaceae;g__;s__
OTU_829	0	0	0	0	0	0	0	3.81694e-05	0	0.000114508	0	0	0	0	0	0	0	0	0	0.000534372	k__Bacteria;p__Myxococcota;c__bacteriap25
OTU_830	0	0	0	0	0	0	0	0	0	0	0	0	0	0	0	0	0	0	0	0	k__Bacteria;p__Proteobacteria;c__Gammaproteobacteria;o__unidentified_Gammaproteobacteria;f__unidentified_Gammaproteobacteria;g__Acidibacter;s__
OTU_831	0	0	0	0	0	0.00141227	0	0	0	0	0	0	0.00167945	0	0	0	0	0	0	0	k__Bacteria;p__unidentified_Bacteria;c__Gammaproteobacteria;o__Steroidobacterales;f__Steroidobacteraceae;g__;s__
OTU_832	0	0	0	0	0	0	0	0.000152678	0.000190847	0.000152678	0.000305355	0	3.81694e-05	0	0	0	0	0	0	0.000229016	k__Bacteria;p__Chloroflexi;c__KD4-96;o__;f__;g__;s__
OTU_833	0	0.000114508	0	0	0	7.63388e-05	0.000114508	0	0	0	0	3.81694e-05	0	0	0	0.00061071	0.000152678	0	0.000419863	0	k__Bacteria;p__Bacteroidota;c__Bacteroidia;o__Bacteroidales;f__Muribaculaceae;g__;s__
OTU_834	0	0	0	7.63388e-05	0	0	0	0	0	0	0	0.000114508	0	0	0	0	0	3.81694e-05	0	0	k__Bacteria;p__Proteobacteria;c__Gammaproteobacteria;o__Pasteurellales;f__Pasteurellaceae;g__Pasteurella;s__[Pasteurella]_aerogenes
OTU_835	0	0	0	0	0	0	0	0	0	0	0	0	0	0	0	0	0	0	0	0	k__Bacteria
OTU_836	0	0	0	0	0	0	0	0	0	0	0	0	0	0	0	0	0	0.000114508	0	0	k__Bacteria;p__Bacteroidota;c__Bacteroidia;o__Flavobacteriales;f__Weeksellaceae;g__Chryseobacterium;s__Chryseobacterium_indologenes
OTU_837	0	0	0	0	0	3.81694e-05	0	0	3.81694e-05	3.81694e-05	0	0	0	0	0	0	0	0	0	0	k__Bacteria;p__Proteobacteria;c__Gammaproteobacteria;o__PLTA13;f__;g__;s__
OTU_838	0	0	0	3.81694e-05	0	0	0	0	0	0	0	0.000114508	0	0	0	0	0	7.63388e-05	0	0	k__Bacteria;p__Firmicutes;c__Bacilli;o__Erysipelotrichales;f__Erysipelotrichaceae;g__Catenisphaera;s__
OTU_839	0	0	0	0	0	0	0	0	0	0	0	0	0	0	0	0	0	0	0	0	k__Bacteria;p__Actinobacteriota;c__Actinobacteria;o__Frankiales;f__Frankiaceae;g__Jatrophihabitans;s__
OTU_840	0	0	0	0	0	0	0	0	0	0	0	0	0	0	0	0	0	0	0	0.000343525	k__Bacteria;p__Proteobacteria;c__Gammaproteobacteria;o__Xanthomonadales;f__Rhodanobacteraceae;g__Pseudofulvimonas;s__
OTU_841	0	0	0	0	0	0	0	3.81694e-05	0	0	3.81694e-05	0	3.81694e-05	0	0	0	0	0	0	0	k__Bacteria;p__Acidobacteriota;c__Acidobacteriae;o__Bryobacterales;f__Bryobacteraceae;g__Bryobacter;s__
OTU_842	3.81694e-05	0	3.81694e-05	3.81694e-05	0	0.000229016	3.81694e-05	0	0	0	0	0	0	3.81694e-05	3.81694e-05	0	3.81694e-05	0	0	0	k__Bacteria;p__Firmicutes;c__Clostridia;o__Clostridia_vadinBB60_group
OTU_843	0	0	0	0	3.81694e-05	0	0	0	0	0	0	3.81694e-05	0	0	0	0	0	7.63388e-05	0	0	k__Bacteria;p__Firmicutes;c__Clostridia;o__Lachnospirales;f__Lachnospiraceae;g__Epulopiscium;s__
OTU_844	0	0	0	0	3.81694e-05	0	0	0	0	0	0	0	0	0	0	0	0	0	0	3.81694e-05	k__Bacteria;p__Proteobacteria;c__Gammaproteobacteria;o__Burkholderiales;f__Burkholderiaceae;g__Lautropia;s__
OTU_845	0	0	0	0	0	0	0	0	0	0	0	0	0.000496202	0	0	0	0	0	0	0	k__Bacteria;p__Cyanobacteria;c__Cyanobacteriia;o__Chloroplast;f__unidentified_Chloroplast;g__unidentified_Chloroplast
OTU_846	0	0	0	0	0	0	0	0	0	0	0.000114508	3.81694e-05	3.81694e-05	0	0	0	0	0	0	0.000114508	k__Bacteria;p__Proteobacteria;c__Alphaproteobacteria;o__Sphingomonadales;f__Sphingomonadaceae;g__Sphingomonas
OTU_847	0	0	0	0	0	0	0	0	0	0	0	0	0	0	0	0	0	0	0	0	k__Bacteria;p__Actinobacteriota;c__Actinobacteria;o__Propionibacteriales;f__Propionibacteriaceae;g__Cutibacterium;s__Cutibacterium_acnes
OTU_848	0	0	0	0	0	0	0	0	0	0	0	0	0	0	0	0	0	0	0	0	k__Bacteria;p__unidentified_Bacteria;c__Saccharimonadia;o__Saccharimonadales
OTU_849	0	0	0	0	0	0	0	0	0	0	0	0	0	0	0	0	0	0	0	0	k__Bacteria;p__Acidobacteriota;c__Acidobacteriae;o__Solibacterales;f__Solibacteraceae;g__Candidatus_Solibacter;s__
OTU_850	0	0	0	0	0	0	3.81694e-05	0	0	0	0	0	3.81694e-05	0	0	0.000916065	0	0	0.00061071	0	k__Bacteria;p__Firmicutes;c__Bacilli;o__Bacillales;f__Bacillaceae;g__Bacillus;s__Bacillus_virus_SPbeta
OTU_851	0	0	0	0.000343525	0	0	7.63388e-05	0	0	0	0	0	0	0.000114508	0	3.81694e-05	0	0	0	3.81694e-05	k__Bacteria
OTU_852	7.63388e-05	0.000114508	3.81694e-05	0	0	0.000114508	0	0	0	0	0	0	0.000229016	0	0.000381694	0	3.81694e-05	7.63388e-05	7.63388e-05	0	k__Bacteria;p__Firmicutes;c__Clostridia;o__Lachnospirales;f__Lachnospiraceae
OTU_853	0	0	0	0	0	0	0	0	0	0	0	0	0	0	0	0	0	0	0	0	k__Bacteria;p__Proteobacteria;c__Gammaproteobacteria;o__Burkholderiales;f__Nitrosomonadaceae;g__MND1;s__
OTU_854	0	0	0	0	0	0	0	0	0	0	0	0	0	0	0	0	0	0	0	0	Unknown
OTU_855	0	0	0	0	0	0	0	0.000152678	0	0.000114508	3.81694e-05	0	0	0	0	0	0	0	0	0	k__Bacteria;p__Firmicutes;c__Bacilli;o__Bacillales;f__Bacillaceae;g__Oceanobacillus;s__
OTU_856	0	0	0	0	0	0	0	0	0	0	0	0	0	0	0	0	0	0	0	0	k__Bacteria;p__Acidobacteriota;c__Blastocatellia;o__11-24;f__;g__;s__
OTU_857	7.63388e-05	0	0	0.000458033	0	3.81694e-05	7.63388e-05	0	0	0	0	0	7.63388e-05	0	0	0	0	0	0	0	k__Bacteria;p__unidentified_Bacteria;c__Clostridia;o__Lachnospirales;f__Lachnospiraceae;g__;s__
OTU_858	0	0	0	0	0	3.81694e-05	0	0	0	0	7.63388e-05	0	0.000458033	0	0	0	0	0	0	0	k__Bacteria;p__unidentified_Bacteria;c__unidentified_Bacteria;o__Gemmatimonadales;f__Gemmatimonadaceae
OTU_859	3.81694e-05	0	0	0	0	3.81694e-05	0	0	0	0	0	0	7.63388e-05	0	7.63388e-05	0	0	0	3.81694e-05	0	k__Bacteria;p__Firmicutes;c__Bacilli;o__RF39;f__;g__;s__
OTU_860	0	0	0	0	0	0	0	3.81694e-05	0	3.81694e-05	0.000152678	0	3.81694e-05	0	0	0	0	0	0	0	k__Bacteria;p__unidentified_Bacteria;c__Myxococcia;o__Myxococcales;f__Myxococcaceae;g__;s__
OTU_861	0	0	0	0	0	0	0	0	0	0	0	0	0	0	0	0	0	0	0	0	k__Bacteria;p__Actinobacteriota;c__Actinobacteria;o__Micrococcales;f__Micrococcaceae;g__Garicola;s__
OTU_862	0	0	0	0	0	0	0	0	0	0	0	0	0	0	0	0	0	0	0	0	k__Bacteria
OTU_863	0	0	0	0	0	0	0	0	0	0	0	0	0	0	0	0	0	0	0	0	k__Bacteria;p__Cyanobacteria;c__Vampirivibrionia;o__Gastranaerophilales;f__;g__;s__
OTU_864	0	0	0	0	0	0	0	0	0	0	0	0	0	0	0	0	0	0	0	3.81694e-05	k__Bacteria;p__Bacteroidota;c__Bacteroidia;o__Bacteroidales;f__Marinifilaceae;g__Butyricimonas;s__Butyricimonas_synergistica
OTU_865	0	0	0	0	0	0	0	0.000152678	7.63388e-05	3.81694e-05	0.000152678	0	0	0	0	0	0	0	0	0.000343525	k__Bacteria;p__GAL15;c__;o__;f__;g__;s__
OTU_866	0	0	0	0	0	0	0	0	0	0	0	0	0	0	0	0	0	0	0	7.63388e-05	k__Bacteria;p__Bacteroidota;c__Bacteroidia;o__Bacteroidales;f__Prevotellaceae;g__Prevotella;s__Prevotella_intermedia
OTU_867	0	0	0	0	0	0	0	0	0	0	0	0	0	0	0	0	0	0	0	0	k__Bacteria;p__Actinobacteriota;c__Acidimicrobiia;o__IMCC26256;f__;g__;s__
OTU_868	0	0	0	0	0	0	0	0	0	0	0	0	0	0	0	0	0	0	0	0	k__Bacteria;p__Acidobacteriota;c__Acidobacteriae;o__Subgroup_12;f__;g__;s__
OTU_869	0	0	0	0	0	0.000152678	0	0	0	0	0	0	0	0	0	0	0	0	0	0	k__Bacteria;p__Proteobacteria;c__Gammaproteobacteria;o__Burkholderiales;f__SC-I-84;g__;s__
OTU_870	0	0	0	0	0	0.000190847	0	0	0	0	0	0	0	0	0	0	7.63388e-05	0	3.81694e-05	0	k__Bacteria;p__Firmicutes;c__Bacilli;o__RF39;f__;g__;s__
OTU_871	0	0	0	0	0	0	0	3.81694e-05	0	3.81694e-05	3.81694e-05	0	0.00061071	0	0	0	0	0	0	0	k__Bacteria;p__Proteobacteria;c__Gammaproteobacteria;o__Burkholderiales;f__Nitrosomonadaceae;g__Ellin6067;s__
OTU_872	0	0	0	0	0	0	0	0	0	0	0	0	0	0	0	0	0	0	0	0	k__Bacteria;p__Firmicutes;c__Clostridia;o__Lachnospirales;f__Defluviitaleaceae;g__Defluviitaleaceae_UCG-011;s__Lachnospiraceae_bacterium_oral_taxon_500
OTU_873	0	0	0	0	0	0	0	0	0	0	0	0	0	0	0	0	0	0	0	0	k__Bacteria;p__Bacteroidota;c__Bacteroidia;o__Chitinophagales;f__Chitinophagaceae;g__Terrimonas;s__
OTU_874	0	0	0	0	0	0	0	0	0	0	0	0	0	0	0	0	0	0	0	0	k__Bacteria;p__Actinobacteriota;c__Actinobacteria;o__Frankiales;f__Acidothermaceae;g__Acidothermus
OTU_875	0	0	0	0	0	0.000152678	0	0	0	0	0	0	0.00114508	3.81694e-05	0	0	0	0	0	0	k__Bacteria;p__Desulfobacterota;c__Desulfuromonadia;o__unidentified_Desulfuromonadia;f__Geothermobacteraceae;g__Geothermobacter;s__
OTU_876	0	0	0	3.81694e-05	0	0	0	0	0	0	0	3.81694e-05	0	0	0	0	0	7.63388e-05	0	7.63388e-05	k__Bacteria;p__Actinobacteriota;c__Coriobacteriia;o__Coriobacteriales;f__Atopobiaceae;g__Olsenella;s__Olsenella_umbonata
OTU_877	0	0	0	0.000114508	0	3.81694e-05	0	0	0	0	0	0	0	0	0	0	3.81694e-05	0	0	0	k__Bacteria;p__Firmicutes;c__Clostridia;o__Oscillospirales;f__Ruminococcaceae
OTU_878	0	0	0	0	0	0	0	0	0	0	0	0	0	0	0	0	0	0	0	0	k__Bacteria;p__Candidatus_Jorgensenbacteria;c__unidentified_Candidatus_Jorgensenbacteria;o__unidentified_Candidatus_Jorgensenbacteria;f__unidentified_Candidatus_Jorgensenbacteria;g__unidentified_Candidatus_Jorgensenbacteria;s__Candidatus_Adlerbacteria_bacterium_GW2011_GWC1_50_9
OTU_879	0	0	0	0	0	0.000114508	0	0	0	0	0	0	0.000877896	0	0	0	3.81694e-05	0	0	0	k__Bacteria;p__Chloroflexi;c__Dehalococcoidia;o__S085;f__;g__;s__
OTU_880	0.000839727	0.000305355	3.81694e-05	3.81694e-05	3.81694e-05	3.81694e-05	0.000229016	0.00148861	0.000725219	0.0023665	0.00225199	0.00206115	7.63388e-05	0.000229016	0.000305355	0.000114508	3.81694e-05	0.00251918	0.000229016	0.00148861	k__Bacteria;p__Actinobacteriota;c__Actinobacteria;o__Bifidobacteriales;f__Bifidobacteriaceae;g__Bifidobacterium;s__Bifidobacterium_choerinum
OTU_881	0	0	0	0	0	0	0	7.63388e-05	0	0	0	0	0	0	0	0	0	0	0	0	k__Bacteria;p__Proteobacteria;c__Alphaproteobacteria;o__Rhizobiales;f__Amb-16S-1323;g__;s__
OTU_882	0	0	0	0	0	0	0	0	0	0	0	0	0	0	0	0	0	0	0	0	k__Bacteria;p__Actinobacteriota;c__Actinobacteria;o__Nitriliruptorales;f__Nitriliruptoraceae
OTU_883	0	0	0	0	0	0	0	0	0	0	0	0	0	0	0	0	0	0	0	0	k__Bacteria;p__unidentified_Bacteria;c__Coriobacteriia;o__Coriobacteriales;f__;g__;s__
OTU_884	0	0	0	0	0	0	0	0	0	0	0	0	0	0	0	0	0	0	0	0	k__Bacteria;p__Actinobacteriota;c__Actinobacteria;o__Corynebacteriales;f__Tsukamurellaceae;g__Tsukamurella
OTU_885	0	0	0	0	0	0	0	0	0	0	0	0	0	0	3.81694e-05	0	0	0	0	0	k__Bacteria;p__Firmicutes;c__Clostridia;o__Clostridia_UCG-014;f__;g__;s__
OTU_886	0	0	0	0	0	0	0	0	0	0	0	0	0	0	0	0	0	0	0	0	k__Bacteria;p__Firmicutes;c__Bacilli;o__RF39;f__;g__;s__
OTU_887	0	0	0	0	0	0	0	0	0	3.81694e-05	0	0	0	0	0	0	0	0	0	0	k__Bacteria;p__Acidobacteriota;c__Vicinamibacteria;o__Vicinamibacterales;f__Vicinamibacteraceae;g__;s__
OTU_888	0	0	0	7.63388e-05	0	0	0	0	0	0	0	0	0	3.81694e-05	0.000114508	0.000114508	7.63388e-05	0	0	0	k__Bacteria;p__Firmicutes;c__Clostridia;o__Peptococcales;f__Peptococcaceae;g__Peptococcus;s__
OTU_889	0	0	0	0	0	0	0	0	0	0	0	0	0	0	0	0	0	0	0	0	k__Bacteria;p__Proteobacteria;c__Alphaproteobacteria;o__Dongiales;f__Dongiaceae;g__Dongia
OTU_890	0	0	0	0	0	7.63388e-05	0	0	0	0	0	0	0	0	0	0	0	0	0	0	k__Bacteria;p__NB1-j;c__;o__;f__;g__;s__
OTU_891	0	0	0	0	0	0	0	0	0	0	0	0	3.81694e-05	7.63388e-05	0	3.81694e-05	0	0	3.81694e-05	0	k__Bacteria;p__Bacteroidota;c__Bacteroidia
OTU_892	0	0	0	0	0	0	0	0	0	0	0	0	0	0	0	0	0	0	0	0	k__Bacteria;p__Proteobacteria;c__Gammaproteobacteria;o__Pasteurellales;f__Pasteurellaceae;g__Actinobacillus;s__Haemophilus_parahaemolyticus
OTU_893	0	0	0	0	0	0	0	0	0	0	0	0	0	0	0	0	0	0	0	0	k__Bacteria;p__Bacteroidota;c__Bacteroidia;o__Bacteroidales;f__Prevotellaceae;g__Prevotella;s__
OTU_894	0	0	0	0	0	0.000152678	0	0	0	0	0	0	0.000152678	0	0	0	0	0	0	0	k__Bacteria;p__unidentified_Bacteria;c__Thermodesulfovibrionia;o__;f__;g__;s__
OTU_895	0	0	0	0	0	0	0	0	0	0	7.63388e-05	0	0	3.81694e-05	0	0	3.81694e-05	0	0	0	k__Bacteria;p__Actinobacteriota;c__Actinobacteria;o__Micrococcales;f__Micrococcaceae;g__Enteractinococcus
OTU_896	0	0	0	0	0	0	0	0	0	0	0	3.81694e-05	0	0	0	0	0	0	0	0	k__Bacteria;p__Firmicutes;c__Clostridia;o__Oscillospirales;f__Oscillospiraceae;g__UCG-005;s__
OTU_897	0	0	0	0	0	0	0	0	0	7.63388e-05	0	0	0	0	0	0	0	0	0	0	k__Bacteria;p__Proteobacteria;c__Alphaproteobacteria;o__Rhizobiales;f__Hyphomicrobiaceae;g__Hyphomicrobium;s__
OTU_898	0	0	0	3.81694e-05	7.63388e-05	0	0	0	0	0	0	0	0	0	0	0	0	3.81694e-05	0	0	k__Bacteria;p__Bacteroidota;c__Bacteroidia;o__Bacteroidales;f__Rikenellaceae;g__dgA-11_gut_group;s__
OTU_899	0.00106874	0.00320623	0.00412229	0.000496202	0.0046185	0.000725219	0.000534372	0.0156876	0.00538188	0.0330165	0.000229016	0.000916065	0.00198481	0.000916065	0.000534372	0.00255735	0.00362609	0.000114508	0.00190847	0	k__Bacteria;p__Bacteroidota;c__Bacteroidia;o__Bacteroidales;f__Muribaculaceae;g__;s__
OTU_900	0	0	0	0	0	0	0	0	0	0	0	0	0	0	0	0	0	3.81694e-05	0	0	k__Bacteria;p__Firmicutes;c__Clostridia;o__Oscillospirales;f__[Eubacterium]_coprostanoligenes_group;g__;s__
OTU_901	0	0	0	0	0	0	0	0	0	0	0	0	0	0	0	0	0	0	0	0	k__Bacteria;p__Firmicutes;c__Negativicutes;o__Veillonellales-Selenomonadales;f__Selenomonadaceae
OTU_902	0	0	0	0	0	0	0	0	0	0	0	0	0	0	0	0	0	0	0	0	k__Bacteria;p__Firmicutes;c__Clostridia;o__Oscillospirales;f__Ruminococcaceae;g__Ruminococcus
OTU_903	0	0	0	0	0	0	0	0	0	0	0	0	0	0	0	0	0	0	0	0	k__Bacteria;p__Bacteroidota;c__Bacteroidia;o__Bacteroidales;f__Prevotellaceae;g__Prevotella;s__Prevotella_denticola
OTU_904	0	0	0	0	0	0	0	0	0	0	0	0	0	0	0	0	0	0	0	0	k__Bacteria;p__Actinobacteriota;c__Acidimicrobiia;o__IMCC26256;f__;g__;s__
OTU_905	0	0	0	0	7.63388e-05	0	0	0	0	0	0	0	0	0	0	0	0	0	0	0.000229016	k__Bacteria;p__Firmicutes;c__Clostridia;o__Eubacteriales;f__Eubacteriaceae;g__Eubacterium;s__Eubacterium_limosum
OTU_906	0	0	0	0	0	3.81694e-05	0	0	0	0	0	0	0	0	0	0	0	0	0	0	k__Bacteria;p__unidentified_Bacteria;c__unidentified_Bacteria;o__Gemmatimonadales;f__Gemmatimonadaceae;g__;s__
OTU_907	0	0	0	0	0	0	0	0	0	0	0	0	0	7.63388e-05	3.81694e-05	0	3.81694e-05	0	0	0	k__Bacteria;p__Firmicutes;c__Clostridia;o__Lachnospirales;f__Defluviitaleaceae;g__Defluviitaleaceae_UCG-011;s__
OTU_908	3.81694e-05	0	0	0	0	3.81694e-05	0	0	0	0	0	0	7.63388e-05	0.000190847	0	0	0.000419863	0	0	0	k__Bacteria
OTU_909	0	0	0	0	0	0	0	0	0	0	0	0	0	0	0	0	0	0	0	0	k__Bacteria;p__Proteobacteria;c__Gammaproteobacteria;o__Burkholderiales;f__Neisseriaceae;g__Eikenella;s__Eikenella_corrodens
OTU_910	0	0	0	0	0	0	0	0	0	0	7.63388e-05	7.63388e-05	0	0	0	0	0	0.000152678	0	0.000229016	k__Bacteria;p__Firmicutes;c__Bacilli;o__Erysipelotrichales;f__Erysipelatoclostridiaceae;g__Catenibacterium;s__
OTU_911	0	0	0	0	0	0	0	0	0	0	0	0	0	0	0	0	0	0	0	0.000381694	k__Bacteria;p__unidentified_Bacteria;c__Gammaproteobacteria;o__Cellvibrionales;f__Cellvibrionaceae;g__;s__
OTU_912	0	0	0	0	0	0	0	0.000114508	0.000114508	0	3.81694e-05	0.000152678	0	0	0	0	0	0	0	3.81694e-05	k__Bacteria;p__Firmicutes;c__Bacilli;o__Bacillales;f__Bacillaceae;g__Bacillus;s__Bacillus_simplex
OTU_913	0	0	0	0.000114508	0	0	0	0	0	0	0	3.81694e-05	0	0	0	0	0	0	0	0	k__Bacteria;p__Bacteroidota;c__Bacteroidia;o__Bacteroidales;f__p-2534-18B5_gut_group;g__;s__
OTU_914	0	0	0	0	0	0	0	3.81694e-05	7.63388e-05	0	3.81694e-05	0	0	0	0	0	0	0	0	0	k__Bacteria;p__Firmicutes;c__Bacilli;o__Bacillales;f__Bacillaceae;g__Bacillus;s__Bacillus_anthracis
OTU_915	0	0	0	0	0	0	0	0	0	0	0	0	0	0	0	0	0	0	0	0	k__Bacteria
OTU_916	0	0	0	0	0	0	0	0	0	0	0	0	0	0	0	0	0	0	0	0	Unknown
OTU_917	0	0	0	0	0	0	0.000305355	0	0	3.81694e-05	0	0	0	0.000190847	0	0	0	0	0	0	k__Bacteria;p__unidentified_Bacteria;c__Bacilli;o__Erysipelotrichales;f__Erysipelotrichaceae;g__;s__
OTU_918	0	0	0	0	0	0	0	0	0	0	0	0	0	0	0	0	0	0	0	0	k__Bacteria;p__Gemmatimonadetes;c__unidentified_Gemmatimonadetes;o__Gemmatimonadales;f__Gemmatimonadaceae;g__Gemmatimonas;s__
OTU_919	0	0	0	0	0	0	0	0	3.81694e-05	3.81694e-05	0	3.81694e-05	0	0	0	0	0	0.000381694	0	0	k__Bacteria;p__Bacteroidota;c__Bacteroidia;o__Bacteroidales;f__Prevotellaceae;g__Prevotella
OTU_920	0	0	0	0.000229016	0	3.81694e-05	0	0	0	0	0	0	3.81694e-05	0	0	0	7.63388e-05	0	0	0	k__Bacteria;p__Firmicutes;c__Bacilli;o__RF39;f__;g__;s__
OTU_921	0	0	0	0	0	0	0	7.63388e-05	3.81694e-05	7.63388e-05	3.81694e-05	0	0	0	0	0	0	0	0	0	k__Bacteria;p__unidentified_Bacteria;c__Alphaproteobacteria;o__;f__;g__;s__
OTU_922	0	0	0	0	0	0	0	0	0	0	0	0.000114508	0	0	0	0	0	0	0	0	k__Bacteria;p__unidentified_Bacteria;c__Acidimicrobiia;o__Microtrichales;f__;g__;s__
OTU_923	0	0	0	0	0.000114508	0	0	0	0	0	0	0.000114508	0	0	0	0	0.000152678	0.000190847	0	0	k__Bacteria;p__Firmicutes;c__Clostridia;o__Lachnospirales;f__Lachnospiraceae
OTU_924	0	0	0	0	0	0	0	3.81694e-05	0	0	0.000114508	0	0	0	0	0	0	0	0	0	k__Bacteria;p__Firmicutes;c__Bacilli;o__Paenibacillales;f__Paenibacillaceae;g__Paenibacillus;s__Paenibacillus_prosopidis
OTU_925	0	0	0	0	0	0	0	0	0	0	0	0	0	0	0	0	0	0	0	3.81694e-05	k__Bacteria;p__Bacteroidota;c__Bacteroidia;o__Bacteroidales;f__Prevotellaceae;g__Prevotella;s__
OTU_926	0	0	0	0	0	0	0	0	0	7.63388e-05	0	0	0	0	0	0	0	0	0	3.81694e-05	k__Bacteria;p__Methylomirabilota;c__Methylomirabilia;o__Rokubacteriales;f__;g__;s__
OTU_927	0	0	0	0	0	0	0	0	3.81694e-05	0	3.81694e-05	0	0	0	0	0	0	0	0	0	k__Bacteria
OTU_928	0	0	0	0	0	0	0	0	0	0	0	0	0	0	0	0	0	0	0	3.81694e-05	k__Bacteria;p__unidentified_Bacteria;c__Bacteroidia;o__Chitinophagales;f__Saprospiraceae;g__;s__
OTU_929	0	0	0	0	0	3.81694e-05	0	0	0	0	0	0	0.000419863	0	0	0	0	0	0	0	k__Bacteria;p__Proteobacteria;c__Gammaproteobacteria;o__Burkholderiales;f__Nitrosomonadaceae;g__Ellin6067;s__
OTU_930	0	0	0	0	0	0	0	0	0	0	0	0	0.000114508	0	0	0	0	0	0	0	k__Bacteria;p__Acidobacteriota;c__Blastocatellia;o__Blastocatellales;f__Blastocatellaceae;g__Stenotrophobacter
OTU_931	0	0	0	0	0	0.00522921	0	0	0	0	0	0	0.00267186	0	0	0	0	0	0	0	k__Bacteria;p__Proteobacteria;c__Gammaproteobacteria;o__Burkholderiales;f__Hydrogenophilaceae;g__Thiobacillus;s__
OTU_932	0	0	0	0	0	0.000114508	0	0	0	0	0	0	0.00064888	0	0	0	0	0	0	0	k__Bacteria;p__Desulfobacterota;c__Desulfobacteria;o__Desulfobacterales;f__Desulfosarcinaceae;g__Sva0081_sediment_group;s__delta_proteobacterium_enrichment_culture_clone_AP-FeEnrich12
OTU_933	0	0	0	0	0	3.81694e-05	0	0	0	0	0	0	0	0	0	0	0	0	0	0	k__Bacteria;p__Acidobacteriota;c__Subgroup_22;o__;f__;g__;s__
OTU_934	0	0	0	0	0	0	0	0	0	3.81694e-05	0	0	0	0	0	0	0	0	0	0	k__Bacteria;p__Verrucomicrobiota;c__Verrucomicrobiae;o__Chthoniobacterales;f__Chthoniobacteraceae;g__Chthoniobacter;s__
OTU_935	0	0	0	0	0	0.000114508	0	0	0	0	0	0	0	0	0	0	0	0	0	0	k__Bacteria;p__unidentified_Bacteria;c__Thermodesulfovibrionia;o__;f__;g__;s__
OTU_936	0	0	0	0	0	0	0	0	0	0	0	0	0	0	0	0	0	0	0	0	k__Bacteria;p__Bdellovibrionota;c__Bdellovibrionia;o__Bdellovibrionales;f__Bdellovibrionaceae;g__Bdellovibrio;s__
OTU_937	0	0	0	0	0	0	0	3.81694e-05	0	3.81694e-05	0	0	0	0	0	0	0	0	0	0.00118325	k__Bacteria;p__Methylomirabilota;c__Methylomirabilia;o__Methylomirabilales;f__Methylomirabilaceae;g__MIZ17;s__
OTU_938	0	0	0	0	0	0	0	7.63388e-05	3.81694e-05	0.000114508	3.81694e-05	0	7.63388e-05	0	0	0	0	0	0	0	k__Bacteria;p__Chloroflexi;c__Dehalococcoidia;o__S085;f__;g__;s__
OTU_939	0	0	0	0	0	0	0	0	0	0	0	0	0	0	0	0	0	0	0	0	k__Bacteria;p__unidentified_Bacteria;c__Saccharimonadia;o__Saccharimonadales
OTU_940	0	0	0	0	0	0	0	0	0	0	0	0	0	0	0	0	0	0	0	0	k__Bacteria;p__Gemmatimonadetes;c__unidentified_Gemmatimonadetes;o__Gemmatimonadales;f__Gemmatimonadaceae;g__Roseisolibacter;s__
OTU_941	0	0	3.81694e-05	7.63388e-05	0	3.81694e-05	0.000114508	0	0	0	0	0	0	0	3.81694e-05	7.63388e-05	0	0	0	0	k__Bacteria;p__Firmicutes;c__Clostridia;o__Oscillospirales;f__Oscillospiraceae;g__Papillibacter;s__
OTU_942	0	0	0	0	0	0	0	0	0	0	0	0	0	0	0	0	0	0	0	0	k__Bacteria
OTU_943	0	0	0	0	0	0	0	0	0	0	0	0	0	0	0	0	0	0	0	0	k__Bacteria;p__Verrucomicrobiota;c__Verrucomicrobiae;o__Chthoniobacterales;f__Chthoniobacteraceae;g__Chthoniobacter;s__
OTU_944	0	0	0	3.81694e-05	3.81694e-05	7.63388e-05	0	0	0	7.63388e-05	0	0	3.81694e-05	0	0	0	3.81694e-05	0	0	0	k__Bacteria
OTU_945	0	0	0	0	0	0	0	3.81694e-05	0.000190847	0.000190847	0.000114508	3.81694e-05	0	0	0	0	0	0	0	0	k__Bacteria;p__Acidobacteriota;c__Blastocatellia;o__Pyrinomonadales;f__Pyrinomonadaceae;g__RB41;s__
OTU_946	0	0	0	0	0	0.000381694	0	0	0	0	3.81694e-05	0	0.000152678	0	0	0	0	0	0	0	k__Bacteria;p__Proteobacteria;c__Alphaproteobacteria;o__Rhizobiales;f__Hyphomicrobiaceae;g__Pedomicrobium;s__
OTU_947	0	0	0	0	0	0	0	0	0	0	0	0	0	0	0	0	0	0	0	0	k__Bacteria;p__unidentified_Bacteria;c__Acidobacteriae;o__Acidobacteriales;f__;g__;s__
OTU_948	0	0	0	0	3.81694e-05	0	0	0	0	0	0	0	0	0	7.63388e-05	0	0	0	0	0.000190847	k__Bacteria;p__Actinobacteriota;c__Coriobacteriia;o__Coriobacteriales;f__Eggerthellaceae;g__Eggerthella;s__
OTU_949	0	0	0	0	0	0	0	0	0	0	3.81694e-05	0	0	0	0	0	0	0	0	0	k__Bacteria;p__Acidobacteriota;c__Acidobacteriae;o__PAUC26f;f__;g__;s__
OTU_950	0	0	0	3.81694e-05	0.000152678	0	0	0	0	0	0	0.000114508	0	0	0	0	0	7.63388e-05	0	0	k__Bacteria;p__Firmicutes;c__Clostridia;o__Oscillospirales;f__Oscillospiraceae;g__NK4A214_group;s__
OTU_951	0	0	0	0	0	0	0	0	0	0	0	0	0	0	0	0	0	0	0	0	k__Bacteria
OTU_952	0	0	0	0	0	0	0	0	0	0	0	0	0.00110691	0	0	0	0	0	0	0	k__Bacteria;p__Proteobacteria;c__Gammaproteobacteria;o__Tenderiales;f__Tenderiaceae;g__Candidatus_Tenderia;s__
OTU_953	0	0	0	0	0	0	0	0	0	0	0	0	0	0	0	0	0	0	0	0	k__Bacteria;p__Bacteroidota;c__Bacteroidia;o__Chitinophagales;f__Chitinophagaceae;g__Flavisolibacter;s__
OTU_954	0	0	0	0	0	0	0	0	0	0	0	3.81694e-05	0	0	0	0	0	0	0	0.000267186	k__Bacteria;p__Firmicutes;c__Clostridia;o__Oscillospirales;f__Ruminococcaceae;g__Negativibacillus;s__
OTU_955	0	0	0	0	0	0	0	0	0	0	0	0	0	0	0	0	0	0	0	0	k__Bacteria;p__Bacteroidota;c__Bacteroidia;o__Bacteroidales;f__Prevotellaceae;g__Prevotella;s__Prevotella_loescheii
OTU_956	0	0	0	0	0	0	0	0	0	0	0	0	0	0	0	0	0	0	0	0	k__Bacteria;p__Proteobacteria;c__Gammaproteobacteria;o__Xanthomonadales;f__Rhodanobacteraceae;g__Rhodanobacter
OTU_957	0	0	0	0	0	0	0	0	0	0	0	0	0	0	0	0	0	0	0	0	k__Bacteria;p__Proteobacteria;c__Gammaproteobacteria;o__Diplorickettsiales;f__Diplorickettsiaceae;g__Aquicella;s__
OTU_958	0	0	0	0	0	3.81694e-05	0	0.000229016	7.63388e-05	7.63388e-05	7.63388e-05	0	3.81694e-05	0	0	0	0	0	0	0.000190847	k__Bacteria;p__Proteobacteria;c__Gammaproteobacteria;o__Burkholderiales;f__TRA3-20;g__;s__
OTU_959	0	0	0	0	0	0.000381694	0	7.63388e-05	0	0	3.81694e-05	0	3.81694e-05	0	0	0	0.000114508	0	0	0	k__Bacteria;p__unidentified_Bacteria;c__unidentified_Bacteria;o__Gemmatimonadales;f__Gemmatimonadaceae;g__;s__
OTU_960	0	0	0	0	0	0	0	0	0	0	0	0	0	0	0	0	0	0	0	0	Unknown
OTU_961	0	0	0	0	0	0	0	0	0	0	0	0	0	0	0	0	0	0	0	0	k__Bacteria;p__Actinobacteriota;c__Actinobacteria;o__Nitriliruptorales;f__Nitriliruptoraceae;g__;s__
OTU_962	0	0	0	0	0	0	0	0.000267186	0.000152678	0.000229016	0.000190847	0	0	0	0	0	0	0	0	0	k__Bacteria;p__Chloroflexi;c__P2-11E;o__;f__;g__;s__
OTU_963	0	0	0	0	0	0	0	0	0.000114508	0	7.63388e-05	0	0	0	0	0	0	0	0	0	k__Bacteria;p__Chloroflexi;c__Dehalococcoidia;o__S085;f__;g__;s__
OTU_964	0	0	0	3.81694e-05	0	0	0	0	0	0	0	0	0	0	0	0	0	0	0	0	k__Bacteria;p__Actinobacteriota;c__Actinobacteria;o__Micrococcales;f__Intrasporangiaceae;g__Ornithinimicrobium;s__
OTU_965	0	0	3.81694e-05	0	3.81694e-05	0	0	0	0	0	0	0	0	0	0	0	0	0	0	3.81694e-05	k__Bacteria;p__Bacteroidota;c__Bacteroidia;o__Bacteroidales;f__Bacteroidaceae;g__Bacteroides;s__Bacteroides_plebeius
OTU_966	0	0	0	0	0	0.000114508	0	0	0	0	0	0	0.000458033	0	0	0	0	0	0	0.000190847	k__Bacteria;p__unidentified_Bacteria;c__Acidimicrobiia;o__Microtrichales;f__;g__;s__
OTU_967	0	0	0	0	0	0	0	0	0	0	0	0	0	0	0	0	0	0	0	0	k__Bacteria;p__Bacteroidota;c__Bacteroidia;o__Bacteroidales;f__Prevotellaceae;g__Prevotella;s__Prevotella_sp_canine_oral_taxon_195
OTU_968	0	0	0	0	0	0	0	0	0	0	0	0	0	0	0	0	0	0	0	0	k__Bacteria
OTU_969	0.000152678	3.81694e-05	3.81694e-05	0	0	0	0	0	0	0	0	0	0	0	0.000267186	0	0	0	0	0	k__Bacteria;p__Firmicutes;c__Bacilli;o__RF39;f__;g__;s__
OTU_970	0	0	0	0	3.81694e-05	0	0	0	0	0	0	0.000114508	0	0	0	0	0	0.000152678	0	0	k__Bacteria;p__Firmicutes;c__Clostridia;o__Oscillospirales;f__UCG-010
OTU_971	0	0	0	3.81694e-05	0	0.000190847	0	0	0	0	0	0	0	0	0	0	0	0	0	0	k__Bacteria;p__Firmicutes;c__Clostridia;o__Clostridia_vadinBB60_group;f__;g__;s__
OTU_972	0	0	0	0	0	0	3.81694e-05	0	0	0	0	0	0	0	0	0	3.81694e-05	0	0	0	k__Bacteria;p__Firmicutes;c__Clostridia;o__Oscillospirales;f__Ruminococcaceae;g__Harryflintia;s__
OTU_973	0	0	0	0	3.81694e-05	0	0	0	0	0	0	0	0	0	0	0	0	0	0	0	k__Bacteria;p__Proteobacteria;c__Gammaproteobacteria;o__Burkholderiales;f__Comamonadaceae;g__Comamonas;s__Ottowia_sp_oral_taxon_894
OTU_974	0	0	0	0	0	0	0	0	0	0	0	0	0	0	0	0	0.000687049	0	0	0	k__Bacteria;p__Firmicutes;c__Clostridia;o__Clostridia_UCG-014;f__;g__;s__
OTU_975	0	0	0	0	0	0	0	0.000114508	3.81694e-05	0	7.63388e-05	0	0	0	0	0	0	0	0	0	k__Bacteria;p__Acidobacteriota;c__Vicinamibacteria;o__Vicinamibacterales;f__Vicinamibacteraceae;g__;s__
OTU_976	0	0	0	0	0	0	0	0	0	0	0	0	0	0	0	0	0	0	0	0	k__Bacteria;p__unidentified_Bacteria;c__Chloroflexia;o__Chloroflexales;f__Roseiflexaceae;g__;s__
OTU_977	0	0	0	0	0	0	0	0	0	0	0	0	0	0	0	0	0	0	0	0	k__Bacteria;p__Firmicutes;c__Bacilli;o__RF39;f__;g__;s__
OTU_978	0.000114508	7.63388e-05	0	0	0	3.81694e-05	0	0	0	0	0	0	7.63388e-05	7.63388e-05	0.000572541	3.81694e-05	3.81694e-05	0	7.63388e-05	0	k__Bacteria;p__Firmicutes;c__Clostridia;o__Clostridia_UCG-014;f__;g__;s__
OTU_979	0	0	0	0	0	0	0	7.63388e-05	3.81694e-05	0	3.81694e-05	7.63388e-05	0	0	0	0	0	0	0	0.000114508	k__Bacteria;p__unidentified_Bacteria;c__unidentified_Bacteria;o__Frankiales;f__;g__;s__
OTU_980	0	7.63388e-05	0	0	0	0	3.81694e-05	0	0	0	0	0	0	0	0	0	0	0	0	0	k__Bacteria;p__Firmicutes;c__Clostridia
OTU_981	0	0	0	0	0	0	0	0	0	0	0	0	0	0	0	0	0	0	0	0	k__Bacteria;p__Chloroflexi;c__Ktedonobacteria;o__Ktedonobacterales;f__JG30-KF-AS9;g__;s__
OTU_982	0	0	0	0	0	0	0	0	0	0	0	0	0	0	0	0	0.000839727	0	0	0	k__Bacteria;p__Firmicutes;c__Clostridia;o__Lachnospirales;f__Lachnospiraceae;g__Lachnospira;s__
OTU_983	0	0	0	0	0	0	0	7.63388e-05	0	3.81694e-05	3.81694e-05	0	7.63388e-05	0	0	0	0	0	0	0	k__Bacteria;p__unidentified_Bacteria;c__unidentified_Bacteria;o__Gemmatimonadales;f__Gemmatimonadaceae;g__;s__
OTU_984	0	0	0	0	0	0	0	0	0	0	0	0	0	0	0	0	0	0	0	0	k__Bacteria;p__Firmicutes;c__Negativicutes;o__Veillonellales-Selenomonadales;f__Veillonellaceae;g__Veillonella;s__
OTU_985	0	0	0	0	0	0.000267186	0	7.63388e-05	0	3.81694e-05	0.000114508	0	7.63388e-05	0	0	0	0	0	0	0	k__Bacteria;p__Actinobacteriota;c__Thermoleophilia;o__Gaiellales;f__Gaiellaceae;g__Gaiella;s__
OTU_986	0	0	0	0.000152678	0	3.81694e-05	0	0	0	0	0	0	0	0	0	3.81694e-05	0	7.63388e-05	7.63388e-05	0	k__Bacteria
OTU_987	0	0	0	0	0	0	0	0	0	0	0	0	0	0	0	0	0	0	0	0	k__Bacteria;p__Campilobacterota;c__Campylobacteria;o__Campylobacterales;f__Sulfurovaceae;g__Sulfurovum;s__
OTU_988	0	0	0	0	3.81694e-05	0	0	0	0	0	0	0	0	0	0	0	0	0	0	3.81694e-05	k__Bacteria;p__Actinobacteriota;c__Actinobacteria;o__Streptosporangiales;f__Streptosporangiaceae;g__Nonomuraea
OTU_989	0	0	0	0	0	0	0	0	0	0	0	0	0	0	0	0	0	0	0	0	k__Bacteria
OTU_990	0	0	0	0	0	0	0	0	0	0	0	0	0	0	0	0	0	0	0	0	k__Bacteria;p__Firmicutes;c__Clostridia;o__Oscillospirales;f__[Eubacterium]_coprostanoligenes_group;g__;s__
OTU_991	0	0	0	0	0	0	0	0	0	0	0	0	0	0	0	0	0	0	0	0	k__Bacteria;p__Firmicutes;c__Negativicutes;o__Veillonellales-Selenomonadales;f__Selenomonadaceae;g__Selenomonas;s__Selenomonas_artemidis
OTU_992	0	0	0	0	0	0	0	0	0	0	0	0	0	0	0	0	0	0	0	0	k__Bacteria;p__Bacteroidota;c__Bacteroidia;o__Bacteroidales;f__Prevotellaceae;g__Prevotellaceae_UCG-001;s__
OTU_993	0	0	0	0	0	0	0	0	0	0	0	0	0	0	0	0	0	0	0	0	k__Bacteria;p__Actinobacteriota;c__Acidimicrobiia;o__IMCC26256;f__;g__;s__
OTU_994	0	0	0	0	0	0	0	0	0	0	0	3.81694e-05	0	0	0	0	0	0	0	0	k__Bacteria;p__Actinobacteriota;c__Actinobacteria;o__Micromonosporales;f__Micromonosporaceae;g__Dactylosporangium;s__
OTU_995	0	0	0	0	0	0	0	0	0	0	0	0	0	0	0	0	0	0	0	0	k__Bacteria;p__Bacteroidota;c__Bacteroidia;o__Bacteroidales;f__Prevotellaceae;g__Prevotella;s__Prevotella_sp_oral_clone_DO014
OTU_996	0	0	0	0	0	0	0	3.81694e-05	0	7.63388e-05	3.81694e-05	0	0	0	0	0	0	0	0	0	k__Bacteria;p__Verrucomicrobiota;c__Verrucomicrobiae;o__Pedosphaerales;f__Pedosphaeraceae
OTU_997	0	0	0	0	0	0	0	0	0	0	0	0	0	0	0	0	0	0	0	3.81694e-05	k__Bacteria;p__Firmicutes;c__Bacilli;o__Mycoplasmatales;f__Mycoplasmataceae;g__Mycoplasma
OTU_998	0	0	0	0	0	0	0	0	0	0	0	0	0	0	0	0	0	0	0	0	k__Bacteria;p__Actinobacteriota;c__Actinobacteria
OTU_999	0	0	0	0	0	0	0	0	0	0	0	0	0	0	0	0	0	0	0	0	k__Bacteria;p__Acidobacteriota;c__Subgroup_11;o__;f__;g__;s__
OTU_1000	0	0	0	0	0	0.00064888	0	0	0	0	0	0	0	0	0	0	0	0	0	0	k__Bacteria
OTU_1001	0	0	0	0	3.81694e-05	0	0	0	0	0	0	0	0	0	0	0	0	0	0	0	k__Bacteria;p__Firmicutes;c__Clostridia;o__Oscillospirales;f__Ruminococcaceae;g__[Eubacterium]_siraeum_group;s__
OTU_1002	0	0	0	0	0	7.63388e-05	0	0	0	0	0	0	0.000114508	0	0	0	0	0	0	3.81694e-05	k__Bacteria;p__Actinobacteriota;c__Actinobacteria;o__Streptomycetales;f__Streptomycetaceae;g__Streptomyces
OTU_1003	0	0	0	0.000190847	3.81694e-05	0	0	0	0	0	0	0	0	0	0	0	0	0	0	0	k__Bacteria
OTU_1004	0	0	0	0	0	0	0	0	0	0	0	0	0	0	0	0	0	0	0	0	k__Bacteria;p__Myxococcota;c__bacteriap25;o__;f__;g__;s__
OTU_1005	0	0	0	0	0	0	0	0	0	0	0	0	0	0	0	0	0	0	0	0.000381694	k__Bacteria;p__Bacteroidota;c__Bacteroidia;o__Cytophagales;f__Microscillaceae;g__Chryseolinea;s__
OTU_1006	0	0	3.81694e-05	0.000190847	3.81694e-05	0	0	0	0	0	0	0	0	0	0	0	0	3.81694e-05	0	0	k__Bacteria;p__Firmicutes;c__Clostridia;o__Lachnospirales;f__Lachnospiraceae
OTU_1007	0	0	0	3.81694e-05	0	3.81694e-05	0	0	0	0	0	3.81694e-05	3.81694e-05	7.63388e-05	0	0	0	0	3.81694e-05	0	k__Bacteria
OTU_1008	0	0	0	0	0	0	0	0	0	0	0	0	0	0	0	0	0	0	0	0	k__Bacteria;p__Proteobacteria;c__Gammaproteobacteria;o__Burkholderiales;f__Nitrosomonadaceae;g__Nitrosomonas;s__
OTU_1009	0	0	0	0	0	0	0	0	0	0	0	0	0	0	0	0	0	0	0	0	k__Bacteria;p__Bacteroidota;c__Bacteroidia;o__Flavobacteriales;f__Flavobacteriaceae;g__Flavobacterium;s__Flavobacterium_anhuiense
OTU_1010	0	0	0	0	0	0	0	0	0	0	0	0	0	0	0	0	0	0	0	0	k__Bacteria;p__unidentified_Bacteria;c__Thermoleophilia;o__Gaiellales
OTU_1011	0	0	0	0	0	0	0	0	3.81694e-05	0	0	0	0	0	0	0	0	0	0	0	k__Bacteria;p__unidentified_Bacteria;c__Bacteroidia;o__Chitinophagales;f__Chitinophagaceae;g__;s__
OTU_1012	0	0	0	0	0	0	0	0	0	0	0	0	0	0	0	0	0	0	0	0	k__Bacteria;p__Firmicutes;c__Clostridia;o__Oscillospirales;f__[Eubacterium]_coprostanoligenes_group;g__;s__
OTU_1013	0	0	0	0.000190847	0	0	3.81694e-05	0	0	0	7.63388e-05	7.63388e-05	0	0	0	0	0	0	0	7.63388e-05	k__Bacteria;p__Firmicutes;c__Bacilli;o__Lactobacillales;f__Lactobacillaceae;g__Lactobacillus
OTU_1014	0	0	0	0	0	0	0	0	0	0	0	0	0	0	0	0	0	0	0	0	k__Bacteria;p__unidentified_Bacteria;c__Alphaproteobacteria;o__Elsterales;f__;g__;s__
OTU_1015	0	0	0	0	0	0	0	0	0	0	0	0	0	0	0	0	0	0	0	0	k__Bacteria;p__Gracilibacteria;c__unidentified_Gracilibacteria;o__Absconditabacteriales_(SR1);f__unidentified_Absconditabacteriales_(SR1);g__unidentified_Absconditabacteriales_(SR1);s__SR1_bacterium_human_oral_taxon_HOT-345
OTU_1016	0	0	0	0	0	0	0	0	0	0	0	0	0	0	0	0	0.000992404	0	0	0	k__Bacteria;p__Bacteroidota;c__Bacteroidia;o__Bacteroidales;f__Prevotellaceae;g__Prevotellaceae_UCG-001;s__
OTU_1017	0	0	0	0	0	0	0	0	0	0	0	0	0	0	0	0	0	0	0	0	k__Bacteria;p__Nitrospirota;c__Nitrospira;o__Nitrospirales;f__Nitrospiraceae;g__;s__
OTU_1018	0	0	0	0	0	0	0	0	3.81694e-05	0	0	0	0	0	0	0	0	0	0	0	k__Bacteria;p__Firmicutes;c__Bacilli;o__Bacillales;f__Bacillaceae;g__Pseudogracilibacillus
OTU_1019	0	0	0	0	0	0	0	0	0	0	3.81694e-05	0	0	0	0	0	0	0	0	0	k__Bacteria;p__Proteobacteria;c__Gammaproteobacteria;o__Xanthomonadales;f__Rhodanobacteraceae;g__Dokdonella;s__
OTU_1020	0	0	0	0	0	0	7.63388e-05	0	0	0	0	0	3.81694e-05	0.000152678	0	0	0	0	0	0	k__Bacteria;p__Firmicutes;c__Clostridia;o__Oscillospirales;f__Butyricicoccaceae;g__UCG-009;s__
OTU_1021	0	0	0	0	0	0	3.81694e-05	0	0	0	0	0	0	0	0	0	0	0.000114508	0	0.000114508	k__Bacteria;p__Firmicutes;c__Bacilli;o__Lactobacillales;f__Enterococcaceae;g__Enterococcus;s__
OTU_1022	0	0	0	0	0	0	0	0	0	0	0	0	0	0	0	0	0	0	0	0	k__Bacteria;p__Bacteroidota;c__Bacteroidia;o__Bacteroidales;f__Porphyromonadaceae;g__Porphyromonas
OTU_1023	0	0	0	0	0	0	0	0	0	0	0	0	0	0	0	0	0	0	0	0	k__Bacteria;p__Proteobacteria;c__Gammaproteobacteria;o__Xanthomonadales;f__Rhodanobacteraceae;g__Pseudofulvimonas;s__
OTU_1024	0	0	0	0	0	0.000114508	0	7.63388e-05	0	0	0	0.000839727	0	0	0	0	0	0	0	0.000114508	k__Bacteria;p__Actinobacteriota;c__Actinobacteria;o__Micromonosporales;f__Micromonosporaceae;g__Actinoplanes
OTU_1025	0	0	0	0	0	0	0	0	0	0	0	0	0	0	0	0	0	0	0	0	k__Bacteria;p__Firmicutes;c__Clostridia;o__Lachnospirales;f__Lachnospiraceae;g__Shuttleworthia;s__Shuttleworthia_satelles
OTU_1026	0	0	0	0	0	0	0	0	0	0	0	0	0	0	0	0	0	0	0	0	k__Bacteria
OTU_1027	0	0	0	0	0	0	0	0	0	0	0	0	0	0	0	0	0	0	0	0	k__Bacteria;p__Acidobacteriota;c__Vicinamibacteria;o__Vicinamibacterales;f__Vicinamibacteraceae;g__;s__
OTU_1028	0	0	0	0	0	0	0	0	0	0	0	0	0.000114508	0	0	0	0	0	0	0	k__Bacteria;p__Myxococcota;c__Polyangia;o__Polyangiales;f__Polyangiaceae
OTU_1029	0	0	0	0	0	0	0	0	0	0	7.63388e-05	0	0	0	0	0	0	0	0	0	k__Bacteria;p__Chloroflexi;c__Chloroflexia;o__Thermomicrobiales;f__AKYG1722;g__;s__
OTU_1030	0	0	0	3.81694e-05	0	0	0	0	0	0	0	0	0	3.81694e-05	0	0	0.0199244	0	0	0	k__Bacteria;p__Bacteroidota;c__Bacteroidia;o__Bacteroidales;f__Bacteroidaceae;g__Bacteroides;s__Bacteroides_stercoris
OTU_1031	0	0	0	0	0	0	0	0	0	0	0	7.63388e-05	0	0	0	0	0	0	0	0	k__Bacteria;p__Proteobacteria;c__Alphaproteobacteria;o__Rhizobiales;f__Xanthobacteraceae;g__Rhodoplanes;s__
OTU_1032	0	0	0	0	0	0	0	0	0	0	0	0	0	0	0	0	0	0	0	0	k__Bacteria;p__unidentified_Bacteria;c__Thermoleophilia;o__Gaiellales;f__;g__;s__
OTU_1033	0	0	0	0	0	0	0	7.63388e-05	0	0	0.000114508	7.63388e-05	0.000190847	0	0	0	0	0	0	0	k__Bacteria;p__Proteobacteria;c__Gammaproteobacteria;o__unidentified_Gammaproteobacteria;f__unidentified_Gammaproteobacteria;g__Acidibacter;s__
OTU_1034	0	0	0	0	3.81694e-05	0	0	0	0	0	0	0	0	0	0	0	0	7.63388e-05	0	0	k__Bacteria;p__unidentified_Bacteria;c__Coriobacteriia;o__Coriobacteriales;f__Eggerthellaceae;g__;s__
OTU_1035	0	0	0	0	0	0	0	0	0	0	0	0	0	0	0	0	0	0	0	0	k__Bacteria;p__Proteobacteria;c__Gammaproteobacteria;o__Xanthomonadales;f__Rhodanobacteraceae
OTU_1036	0	0	0	0	0	0	0	0	0	0	0	0	0	0	0	0	0	0	0	0.000229016	k__Bacteria;p__Bacteroidota;c__Bacteroidia;o__Chitinophagales;f__Chitinophagaceae;g__Puia;s__
OTU_1037	0	0	0.000114508	0	0	0.000114508	3.81694e-05	0	0	0	0	0	0.000114508	0	0	0	3.81694e-05	0	0.000114508	0	k__Bacteria;p__Bacteroidota;c__Bacteroidia;o__Bacteroidales;f__Muribaculaceae;g__;s__
OTU_1038	0	0	0	0	0	0	0	0	0	7.63388e-05	0	0.000114508	3.81694e-05	0	0	0	0	0	0	0	k__Bacteria;p__Proteobacteria;c__Alphaproteobacteria;o__Sphingomonadales;f__Sphingomonadaceae;g__Sphingobium;s__Sphingobium_yanoikuyae
OTU_1039	0	0	0	0	0	0	0	0	0	0	0	0	0	0	0	0	0	0	0	0	k__Bacteria;p__Chloroflexi;c__OLB14;o__;f__;g__;s__
OTU_1040	0	0	0	0	0	0	0	0	0	0	0	0	0	0	0	0	0	0	0	0	k__Bacteria;p__unidentified_Bacteria;c__Alphaproteobacteria;o__unidentified_Alphaproteobacteria;f__unidentified_Alphaproteobacteria;g__unidentified_Alphaproteobacteria;s__Rhodospirillaceae_bacterium
OTU_1041	0	0	0	0	0	0	0	0	0	0	0	0	0	0	0	0	0	0	0	0	k__Bacteria;p__Gemmatimonadetes;c__unidentified_Gemmatimonadetes;o__Gemmatimonadales;f__Gemmatimonadaceae;g__Gemmatimonas;s__
OTU_1042	0	0	0	0	0	0	0	0	0	0	0	0	7.63388e-05	0	0	0	3.81694e-05	0	0	0	k__Bacteria;p__Bacteroidota;c__Bacteroidia;o__Bacteroidales;f__Muribaculaceae;g__;s__
OTU_1043	0	0	0	0	0	0	0	0	0	0	0	0	0	0	0	0	0	0	0	0	k__Bacteria;p__Firmicutes;c__Clostridia;o__Clostridia_UCG-014;f__;g__;s__
OTU_1044	0	0	0	0	0	0	0	0	0	0	0	0	0	0	0	0	0	0	0	0	k__Bacteria;p__unidentified_Bacteria;c__Alphaproteobacteria;o__Elsterales;f__;g__;s__
OTU_1045	0	0	0	0	0	0	0	0	0	0	0	0	0	0	0	0	0	0	0	0	k__Bacteria;p__Bacteroidota;c__Bacteroidia;o__Flavobacteriales;f__Weeksellaceae;g__Bergeyella;s__
OTU_1046	0	0.000190847	0	0	0	0	3.81694e-05	0	0	0	0	0	0	0	3.81694e-05	0	0	0	0	0	k__Bacteria;p__Proteobacteria;c__Alphaproteobacteria;o__Rickettsiales;f__Mitochondria;g__unidentified_Mitochondria
OTU_1047	0	0	0	0	7.63388e-05	0	0	0	0	0	0	0	3.81694e-05	0	0	0	0	0	0	0	k__Bacteria;p__Proteobacteria;c__Gammaproteobacteria;o__Burkholderiales;f__Comamonadaceae
OTU_1048	0	0	0	0	0	0	0	3.81694e-05	0	0	0	0	0	0	0	0	0	0	0	3.81694e-05	k__Bacteria;p__Actinobacteriota;c__Thermoleophilia;o__Solirubrobacterales;f__Solirubrobacteraceae;g__Conexibacter;s__
OTU_1049	7.63388e-05	0.000114508	0.000114508	0	0	0.000114508	0.000229016	0	0	0	0	0	0.000190847	0.000229016	7.63388e-05	0.000419863	0.000992404	0.000152678	0.000152678	3.81694e-05	k__Bacteria;p__Bacteroidota;c__Bacteroidia;o__Bacteroidales;f__Rikenellaceae;g__Alistipes;s__Alistipes_inops
OTU_1050	0	0	0	0	0	0	0	0	0	0	3.81694e-05	0	0	0	0	0	0	0	0	0.000381694	k__Bacteria;p__GAL15;c__;o__;f__;g__;s__
OTU_1051	0	0	0	0	0	7.63388e-05	0	0	0	0	0	0	0.000534372	0	0	0	0	0	0	0	k__Bacteria;p__unidentified_Bacteria;c__Anaerolineae;o__Anaerolineales;f__Anaerolineaceae;g__;s__
OTU_1052	0	0	0	0	0	0	0	0	0	0	0	0	0	0	0	0	0	0	0	0	k__Bacteria;p__unidentified_Bacteria;c__Saccharimonadia;o__Saccharimonadales;f__LWQ8;g__;s__
OTU_1053	0.000152678	7.63388e-05	0	0.000152678	0	3.81694e-05	0	0	0	0	0	0	0	0	7.63388e-05	0	0	0	0	0	k__Bacteria
OTU_1054	0	7.63388e-05	3.81694e-05	0	0.000152678	0	0.000381694	0.000725219	0	3.81694e-05	0	0	0	0.000152678	0.000305355	0.000534372	0	0	7.63388e-05	0	k__Bacteria;p__Firmicutes;c__Bacilli;o__Lactobacillales;f__Lactobacillaceae;g__Lactobacillus;s__
OTU_1055	0	0	0	3.81694e-05	0	0	0	0	0	0	0	7.63388e-05	0	0	0	0	0.000419863	0.000229016	0	0	k__Bacteria;p__Bacteroidota;c__Bacteroidia;o__Bacteroidales;f__Prevotellaceae;g__Prevotella;s__Prevotella_sp_DJF_LS16
OTU_1056	0	0	0	7.63388e-05	0	0.000152678	0.000152678	0	0	0	0	0	3.81694e-05	7.63388e-05	3.81694e-05	0	0	0	0	0	k__Bacteria;p__unidentified_Bacteria;c__Clostridia;o__Oscillospirales;f__Oscillospiraceae;g__;s__
OTU_1057	0	0	0	0.000152678	0	0	0	0	0	0	0	0.000114508	0	0	0	0	0	0.000114508	0	0	k__Bacteria;p__Firmicutes;c__Negativicutes;o__Veillonellales-Selenomonadales;f__Veillonellaceae;g__Allisonella;s__
OTU_1058	0	0	0	0	0	0	0	0	0	0	0	0	0	0	0	0	0	0	0	0	k__Bacteria;p__Proteobacteria;c__Alphaproteobacteria;o__Rhizobiales;f__unidentified_Rhizobiales;g__Bauldia;s__
OTU_1059	0	0	0	0	0	0	0	3.81694e-05	0	0	0	0	0	0	0	0	0	0	0	0	k__Bacteria;p__Acidobacteriota;c__Blastocatellia;o__Blastocatellales;f__Blastocatellaceae
OTU_1060	0	0	0	0	0	0	0	3.81694e-05	7.63388e-05	7.63388e-05	0.000152678	0	0	0	0	0	0	0	0	0	k__Bacteria;p__Proteobacteria;c__Alphaproteobacteria;o__Rhizobiales;f__unidentified_Rhizobiales;g__Nordella;s__Nordella_oligomobilis
OTU_1061	0	0	0	0	0.000229016	0	0	0	0	0	0	0.000114508	0	0	0	0	0	0.000152678	0	0	k__Bacteria;p__Firmicutes;c__Clostridia;o__Christensenellales;f__Christensenellaceae;g__Christensenellaceae_R-7_group;s__
OTU_1062	0	0	0	0	0	3.81694e-05	0	0	0	0	0	0	0.000419863	0	0	0	0	0	0	0	k__Bacteria;p__Bacteroidota;c__Bacteroidia;o__Bacteroidales;f__Bacteroidetes_vadinHA17;g__;s__
OTU_1063	0	0	0	0	0	0	0	0	0	0	0	0	3.81694e-05	0	0	0	0	0	0	0	k__Bacteria;p__Bacteroidota;c__Bacteroidia;o__Cytophagales;f__Microscillaceae;g__Chryseolinea;s__
OTU_1064	0	0	0	0	3.81694e-05	3.81694e-05	0	0	0	0	0	3.81694e-05	0	0	0	0	0	0	0	0	k__Bacteria;p__Proteobacteria;c__Gammaproteobacteria;o__Burkholderiales;f__Comamonadaceae;g__Ramlibacter
OTU_1065	0	0	0	0	0	0	0	0	0	0	0	0	0	0	0	0	0	0	0	0	k__Bacteria;p__Bacteroidota;c__Bacteroidia;o__Chitinophagales;f__Chitinophagaceae;g__Edaphobaculum;s__
OTU_1066	0	0	0	0	0	0	0	0	0	0	0	7.63388e-05	0	0	0	0	0	0.000152678	0	0	k__Bacteria;p__Desulfobacterota;c__Desulfovibrionia;o__Desulfovibrionales;f__Desulfovibrionaceae;g__Mailhella
OTU_1067	0	0	0	0	0	0	0	3.81694e-05	0	0	0	0	0	0	0	0	0	0	0	0	k__Bacteria;p__Acidobacteriota;c__Blastocatellia;o__Pyrinomonadales;f__Pyrinomonadaceae;g__RB41;s__
OTU_1068	0	0	0	0	0	0	0	0	0	0	0	0	0	0	0	0	0	0	0	0	k__Bacteria;p__Firmicutes;c__Bacilli;o__RF39;f__;g__;s__
OTU_1069	0	0	0	0	0	0	0	3.81694e-05	3.81694e-05	0	3.81694e-05	0	0	0	0	0	0	0	0	0	k__Bacteria;p__Acidobacteriota;c__Subgroup_11;o__;f__;g__;s__
OTU_1070	0	0	0	0	0	0	0	0.000190847	0	3.81694e-05	0.000114508	0	0	0	0	0	0	0	0	0	k__Bacteria;p__Firmicutes;c__Bacilli;o__Bacillales;f__Bacillaceae;g__Cerasibacillus;s__
OTU_1071	0	0	0	0	0	0	0	0	0	0	0	0	0	0	0	0	0	0	0	0	k__Bacteria;p__Actinobacteriota;c__MB-A2-108;o__;f__;g__;s__
OTU_1072	0	0	0	0	0	0	0	0	0	0	0	0	0	0	0	0	0	0	0	0	k__Bacteria;p__Bacteroidota;c__Bacteroidia;o__Bacteroidales;f__Muribaculaceae;g__;s__
OTU_1073	0	0	0	0	0	0	0	0	0	0	0	0.00061071	0	0	0	0	0	0	0	0	k__Bacteria;p__Proteobacteria;c__Alphaproteobacteria;o__Tistrellales;f__Geminicoccaceae;g__Candidatus_Alysiosphaera;s__
OTU_1074	0	0	0	0	0	0	0	0.000267186	0	7.63388e-05	3.81694e-05	0	0	0	0	0	0	0	0	3.81694e-05	k__Bacteria;p__Proteobacteria;c__Gammaproteobacteria;o__Burkholderiales;f__Nitrosomonadaceae;g__IS-44;s__
OTU_1075	0	0	0	0	0	0	0	0	0	0	0	0	0	0	0	0	0	0	0	0	k__Bacteria;p__unidentified_Bacteria;c__Acidobacteriae;o__Acidobacteriales
OTU_1076	0	0	0	0	0	0	0	0	0	0	0	0	0	0	0	0	0	0	0	0	k__Bacteria;p__Proteobacteria;c__Gammaproteobacteria;o__Burkholderiales;f__Sutterellaceae;g__Sutterella;s__
OTU_1077	0	0	0	0	0	0	0	0	0	0	0	0	0	0	0	0	0	0	0	0	k__Bacteria;p__Acidobacteriota;c__Vicinamibacteria;o__Vicinamibacterales;f__Vicinamibacteraceae;g__;s__
OTU_1078	0	0	0	0	0	0	0	0	0	0	0	0	0	0	0	0	0	0	0	0	k__Bacteria;p__Fusobacteriota;c__Fusobacteriia;o__Fusobacteriales;f__Leptotrichiaceae;g__Leptotrichia
OTU_1079	0	0	0	0	0	0	0	0	0.000152678	3.81694e-05	7.63388e-05	0	0	0	0	0	0	0	0	0	k__Bacteria;p__Planctomycetota;c__Pla4_lineage;o__;f__;g__;s__
OTU_1080	0	0	3.81694e-05	0	0	0.000114508	0	3.81694e-05	7.63388e-05	0.000152678	3.81694e-05	0.000114508	7.63388e-05	0	0	0	0	0	0	3.81694e-05	k__Bacteria;p__Actinobacteriota;c__Actinobacteria;o__Streptomycetales;f__Streptomycetaceae;g__Streptomyces
OTU_1081	0	0	0	0	0	0	0	0.000114508	0	0	7.63388e-05	0	0	0	0	0	0	0	0	0	k__Bacteria;p__Actinobacteriota;c__Thermoleophilia;o__Gaiellales;f__Gaiellaceae;g__Gaiella;s__
OTU_1082	0	0	0	0	0	0	0	0	0	0	0	0	0	0	0	0	0	0	0	0	k__Bacteria;p__Firmicutes;c__Clostridia;o__Peptostreptococcales-Tissierellales;f__Anaerovoracaceae;g__[Eubacterium]_brachy_group;s__[Eubacterium]_brachy
OTU_1083	0	0	0	0	0	3.81694e-05	0	0	0	0	0	0	0	0	0	0	0	0	0	0	k__Bacteria;p__Latescibacterota;c__;o__;f__;g__;s__
OTU_1084	0	0	0	0	0	0	0	0	0	0	0	0	0	0	0	0	0	0	0	0	k__Bacteria;p__unidentified_Bacteria;c__Acidimicrobiia;o__;f__;g__;s__
OTU_1085	0	0	0	0	0	0	0	0	0	0	0	0	0	0	0	0	0	0	0	0	k__Bacteria;p__Bacteroidota;c__Bacteroidia
OTU_1086	0	0	0	0	0	0	0	0	0	0	0	0	0	0	0	0	0	0	0	0	k__Bacteria
OTU_1087	0	0	0	0	0	0	0	0	0	0	0	0	0	0	0	0	0	0	0	0	k__Bacteria;p__Firmicutes;c__Clostridia;o__Oscillospirales;f__UCG-010;g__;s__
OTU_1088	0	0	0	0	0	0	0	7.63388e-05	0	3.81694e-05	0	0	0	0	0	0	0	0	0	0	k__Bacteria;p__Proteobacteria;c__Gammaproteobacteria;o__Xanthomonadales;f__Xanthomonadaceae
OTU_1089	0	0	0	0	0	0	0	0	7.63388e-05	3.81694e-05	0	0	0	0	0	0	0	0	0	0	k__Bacteria;p__Acidobacteriota;c__Subgroup_5;o__;f__;g__;s__
OTU_1090	0	0	0	0	0	0	0	0	0	0	0	0.000114508	0	0	0	0	0	0.000114508	0	0	k__Bacteria;p__Firmicutes;c__Clostridia;o__Peptococcales;f__Peptococcaceae;g__Peptococcus;s__
OTU_1091	0	0	0	0	0	0	0	0	0	0	0	0.000381694	3.81694e-05	0	0	0	0	0	0	0	k__Bacteria;p__Proteobacteria;c__Alphaproteobacteria;o__Rhizobiales;f__Beijerinckiaceae;g__Microvirga;s__
OTU_1092	0	0	0	0	0	0	0	0.000152678	0	3.81694e-05	3.81694e-05	0	0	0	0	0	0	0	0	0	k__Bacteria;p__unidentified_Bacteria;c__Bacteroidia;o__Chitinophagales;f__Saprospiraceae;g__;s__
OTU_1093	0	0	0	0	0	0	0	3.81694e-05	3.81694e-05	7.63388e-05	3.81694e-05	0	0	0	0	0	0	0	0	0	k__Bacteria;p__unidentified_Bacteria;c__Acidimicrobiia;o__;f__;g__;s__
OTU_1094	0	0	0	0	0	0	0	0	0	3.81694e-05	0	0	0	0	0	0	0.000839727	0	0	0	k__Bacteria;p__Bacteroidota;c__Bacteroidia;o__Bacteroidales;f__Bacteroidaceae;g__Bacteroides;s__Bacteroides_eggerthii
OTU_1095	0	0	0	0	0	0	0	0	0	0	0	0	0	7.63388e-05	0	0	0	0	0	0	k__Bacteria
OTU_1096	0	0	0	0	7.63388e-05	0	0	0	0	0	0	0	0	0	0	0	0	0	0	0	k__Bacteria;p__Spirochaetota;c__Spirochaetia;o__Spirochaetales;f__Spirochaetaceae;g__Treponema;s__Treponema_sp_OMZ_838
OTU_1097	0	0	0	0	0	0	0	0.000381694	3.81694e-05	0.000229016	0.000343525	0	0	0	0	0	0	0	0	7.63388e-05	k__Bacteria;p__unidentified_Bacteria;c__unidentified_Bacteria;o__Gemmatimonadales;f__Gemmatimonadaceae;g__;s__
OTU_1098	0	0	0	0	0	0	0	0	0	0	0	0	0	0	0	0	0	0	0	0	k__Bacteria;p__Cyanobacteria;c__Cyanobacteriia;o__Chloroplast;f__unidentified_Chloroplast;g__unidentified_Chloroplast
OTU_1099	0	0	0	0	0	0	0	0	0	0	0	0	0	0	0	0	0	0	0	0	k__Bacteria;p__Acidobacteriota;c__Acidobacteriae
OTU_1100	7.63388e-05	0	0	0	0	0	0	0	0	0	0	0	3.81694e-05	0	0	0	0	0	0	0	k__Bacteria;p__Firmicutes;c__Clostridia;o__Clostridia_vadinBB60_group;f__;g__;s__
OTU_1101	0	0	0	0	0	0	0	0	0	0	0	0	0	0	0	0	0	0	0	0	k__Bacteria;p__Proteobacteria;c__Alphaproteobacteria;o__Rhizobiales;f__Xanthobacteraceae;g__Rhodopseudomonas;s__Rhodopseudomonas_sp
OTU_1102	0	0	0	0	3.81694e-05	3.81694e-05	0	0	0	0	0	0	0	0	0	0	3.81694e-05	0	0	0	k__Bacteria;p__Firmicutes;c__Bacilli;o__RF39;f__;g__;s__
OTU_1103	0	0	0	0	0	0	0	0	0	0	0	0.000152678	0	0	0	0	0	0.000114508	0	0	k__Bacteria;p__Firmicutes;c__Bacilli;o__Lactobacillales;f__Streptococcaceae;g__Streptococcus;s__Streptococcus_suis
OTU_1104	0	0	0	0	0	0	0	0	0	0	0	0	0	0	0	0	0	0	0	0	k__Bacteria;p__Proteobacteria;c__Gammaproteobacteria;o__Oceanospirillales;f__Saccharospirillaceae;g__Oceanobacter;s__
OTU_1105	0	0	0	0	0	0	0	3.81694e-05	0	3.81694e-05	3.81694e-05	0	0.000190847	0	0	0	0	0	0	0	k__Bacteria
OTU_1106	0	0	0	0	0	0	0	0	0	0	0	0	0	0	0	0	0	0	0	0	k__Bacteria;p__Proteobacteria;c__Gammaproteobacteria;o__Xanthomonadales;f__Rhodanobacteraceae;g__Tahibacter;s__
OTU_1107	0	0	0	0	0	0	0	0	0	0	0	0	0	0	0	0	0	0	3.81694e-05	0	k__Bacteria;p__Firmicutes;c__Bacilli;o__RF39;f__;g__;s__
OTU_1108	0	0	0	0	0	0.000496202	0	0	0	0	0	0	0	0	0	0	0	0	0	0	k__Bacteria;p__Proteobacteria;c__Gammaproteobacteria;o__Burkholderiales;f__B1-7BS;g__;s__
OTU_1109	0	0.000114508	0	7.63388e-05	0	0	0	0	0	0	0	0	0	0	0	0	3.81694e-05	0	0	0	k__Bacteria;p__Firmicutes;c__Clostridia;o__Peptostreptococcales-Tissierellales;f__Anaerovoracaceae;g__Anaerovorax;s__
OTU_1110	0	0	0	0	0.000114508	0	0	0	0	0	0	0.000114508	0	0	0	0	0	0.000114508	0	0	k__Bacteria;p__Firmicutes;c__Bacilli;o__RF39;f__;g__;s__
OTU_1111	7.63388e-05	0.000229016	0	0	0	0	3.81694e-05	0	0	0	0	0	0	3.81694e-05	0	3.81694e-05	3.81694e-05	0	0.000267186	0	k__Bacteria;p__Firmicutes;c__Bacilli;o__Lactobacillales;f__Streptococcaceae;g__Lactococcus;s__Lactococcus_garvieae
OTU_1112	0	0	0	0	7.63388e-05	0	0	0	0	0	0	0	0	0	0	0	0	0	0	3.81694e-05	k__Bacteria;p__Firmicutes;c__Clostridia;o__Lachnospirales;f__Lachnospiraceae;g__Anaerostipes
OTU_1113	0	0	0	0	0	0	0	0	0	0	0	0	0	0	0	0	0	0	0	0	k__Bacteria;p__Firmicutes;c__Negativicutes;o__Veillonellales-Selenomonadales;f__Selenomonadaceae;g__Selenomonas;s__Selenomonas_sputigena
OTU_1114	0	0	0	0	0	0	0	0	0	0	0	0	0	0	0	0	0	0	0	0	k__Bacteria;p__Actinobacteriota;c__Actinobacteria;o__Micrococcales;f__Micrococcaceae;g__Yaniella;s__
OTU_1115	0	0	0	0	0	0.000305355	0	0	0	0	0	0	0	0	0	0	0	0	0	0	k__Bacteria;p__DTB120;c__unidentified_DTB120;o__unidentified_DTB120;f__unidentified_DTB120;g__unidentified_DTB120;s__Deltaproteobacteria_bacterium_GWC2_55_46
OTU_1116	0	0	0	0	0	0	0	0	0	0	0	0	0.000419863	0	0	0	0	0	0	0	k__Bacteria;p__Myxococcota;c__Polyangia;o__Polyangiales;f__Polyangiaceae;g__Polyangium;s__
OTU_1117	0	0	0	0	0	0	0	0	0	0	0	0	7.63388e-05	0	0	0	0	0	0	0	k__Bacteria;p__Actinobacteriota;c__Thermoleophilia;o__Solirubrobacterales;f__67-14;g__;s__
OTU_1118	0	0	0	0	0	0	0	0	0	0	0	0	0	0	0	0	0	0	0	0	k__Bacteria;p__Acidobacteriota;c__Blastocatellia;o__11-24;f__;g__;s__
OTU_1119	0.000114508	0.000114508	0	0	0	0	0	0	0	0	0	0	0	7.63388e-05	0	0	0	0	7.63388e-05	0	k__Bacteria;p__Bacteroidota;c__Bacteroidia;o__Bacteroidales;f__Muribaculaceae;g__;s__
OTU_1120	0	0	0	0	0	0	0	0	0	0	0	0	0.000687049	0	0	0	0	0	0	0	k__Bacteria;p__Proteobacteria;c__Gammaproteobacteria;o__PLTA13;f__;g__;s__
OTU_1121	0	0	0	0	0	0	0	0	0	0	0	0	0	0	0	0	0	0	0	0	k__Bacteria;p__Firmicutes;c__Bacilli;o__Lactobacillales;f__Carnobacteriaceae;g__Alkalibacterium;s__
OTU_1122	0	0	0	0	7.63388e-05	0	0	0	0	0	0	0	0	0	0	0	0.000534372	0	0	7.63388e-05	k__Bacteria;p__Firmicutes;c__Clostridia;o__Lachnospirales;f__Lachnospiraceae;g__Lachnospiraceae_UCG-010;s__
OTU_1123	0	0	0	0	0	0	0	0	0	0	0	7.63388e-05	0	0	0	0	0	0	0	0	k__Bacteria;p__Actinobacteriota;c__Actinobacteria;o__Micromonosporales;f__Micromonosporaceae;g__Virgisporangium;s__
OTU_1124	0	0	0	0	0	0	0	0	3.81694e-05	0	0	0	0	0	0	0	0	0	0	0	k__Bacteria;p__Chloroflexi;c__TK10;o__;f__;g__;s__
OTU_1125	0	0	0	0	0	0.000496202	0	0	0	0	0	0	0	0	0	0	0	0	0	0	k__Bacteria;p__Sva0485;c__;o__;f__;g__;s__
OTU_1126	0	0	0	0	0	0.000763388	0	0	0	0	0	0	0	0	0	0	0	0	0	0	k__Bacteria;p__unidentified_Bacteria;c__Anaerolineae;o__Anaerolineales;f__Anaerolineaceae;g__;s__
OTU_1127	0	0	0	0	0	0	0	0	0	0	0	0	0	0	0	0	0	0	0	0	k__Bacteria
OTU_1128	0	0	0	0	0	0	0	0	0	0	0	0	0	0	0	0	0	0	0	0	k__Bacteria;p__Proteobacteria;c__Gammaproteobacteria;o__Pseudomonadales;f__Pseudomonadaceae;g__Thiopseudomonas;s__
OTU_1129	0	0	0	3.81694e-05	0.000190847	0	0	0	0	0	0	0	0	0	0	0	0	0	0	0.000267186	k__Bacteria;p__Firmicutes;c__Clostridia;o__Peptococcales;f__Peptococcaceae;g__Peptococcus;s__
OTU_1130	0	0	0	0	0	0	0	0	0	0	0	0	0	0	0	0	0	0	0	0	k__Bacteria;p__Chloroflexi;c__Ktedonobacteria;o__Ktedonobacterales;f__JG30-KF-AS9;g__;s__
OTU_1131	0	0	0	0	0	0	0	0	0	3.81694e-05	0	0	3.81694e-05	0	0	0	0	0	0	0	k__Bacteria;p__Proteobacteria;c__Gammaproteobacteria;o__Burkholderiales;f__Nitrosomonadaceae;g__Ellin6067;s__
OTU_1132	0	0	0	0.00103057	0.000687049	0	0	0	0	0	0	3.81694e-05	0	0	0	0	0	0	0	0.00183213	k__Bacteria;p__Firmicutes;c__Clostridia;o__Clostridia_UCG-014;f__;g__;s__
OTU_1133	0	0	0	0	0	0.000496202	0	0	0	0	0	0	0	0	0	0	0	0	0	0	k__Bacteria;p__Acidobacteriota;c__Acidobacteriae;o__GOUTB8;f__;g__;s__
OTU_1134	0	0	0	7.63388e-05	0	0	0	0	0	7.63388e-05	0	3.81694e-05	0.000190847	0	3.81694e-05	0	0	0	0	7.63388e-05	k__Bacteria;p__Actinobacteriota;c__Acidimicrobiia;o__Microtrichales;f__Ilumatobacteraceae;g__Ilumatobacter;s__
OTU_1135	0	0	0	0.000343525	0	0	0	0	0	0	0	0	0	0	0	0	0	0	0	0	k__Bacteria;p__Firmicutes;c__Clostridia;o__Clostridia_UCG-014;f__;g__;s__
OTU_1136	0	0	0	0	0	0	0	0	0	0	0	0	0	0	0	0	0	0	0	0	k__Bacteria;p__Bacteroidota;c__Bacteroidia;o__Cytophagales;f__Spirosomaceae;g__Dyadobacter;s__Dyadobacter_fermentans
OTU_1137	0	0	0	0	0	0	0	0	0	0	0	0	0	0	0	0	0	0	0	0	k__Bacteria;p__Acidobacteriota;c__Acidobacteriae;o__Subgroup_2;f__;g__;s__
OTU_1138	0	0	0	0	0	0	0	0	0	0	0	0	0	0	0	0	0	0	0	0	k__Bacteria;p__Firmicutes;c__Bacilli;o__Lactobacillales;f__Lactobacillaceae;g__Lactobacillus;s__Lactobacillus_sanfranciscensis
OTU_1139	0	0	0	0	0	0	0	0	0	0	0	0	0	0	0	0	0	0	0	0	k__Bacteria
OTU_1140	0	0	0	0	0	0	0	0	0	0	0	0	0	0	0	0	0	0	3.81694e-05	0	k__Bacteria;p__Firmicutes;c__Clostridia;o__Clostridiales;f__Clostridiaceae;g__Clostridium_sensu_stricto_2;s__
OTU_1141	0	0	0	0	0	0	0	0	0	0	0	0	0	0	0	0	0	0	0	0	k__Bacteria
OTU_1142	0	0	0	0	0	0	0	0	0	0	0	0	0	0	0	0	0	0	0	0	k__Bacteria;p__Candidatus_Adlerbacteria;c__;o__;f__;g__;s__
OTU_1143	0	3.81694e-05	0	0	0	0	7.63388e-05	0	0.000877896	0	0	0.000534372	0	7.63388e-05	0	0.000152678	0.00167945	0	0.000419863	0	k__Bacteria;p__Firmicutes;c__Bacilli;o__Lactobacillales;f__Lactobacillaceae;g__Lactobacillus
OTU_1144	0	0	0	0	0	0	0	0	0	0	0	0	0	0	0	0	0	0	0	7.63388e-05	k__Bacteria;p__Chloroflexi;c__Chloroflexia;o__Thermomicrobiales;f__AKYG1722;g__;s__
OTU_1145	0	0	0	0	0	0	0	0	0	0	0	0	0.000267186	0	0	0	0	0	0	0	k__Bacteria;p__unidentified_Bacteria;c__Alphaproteobacteria;o__Kiloniellales;f__Fodinicurvataceae;g__;s__
OTU_1146	0	0	0	0	0	0	0	0	0	0	0	0	0	0	0	0	0	0	0	0	Unknown
OTU_1147	0	0	0	0	0	0	0	0	0	0	3.81694e-05	0	0	0	0	0	0	0	0	0	k__Bacteria;p__Bacteroidota;c__Bacteroidia;o__Chitinophagales;f__Chitinophagaceae;g__Chitinophaga
OTU_1148	0	0	0	0	0	0	0	0	0	0	0	0	7.63388e-05	0	0	0	0	0	0	0	k__Bacteria;p__Myxococcota;c__Polyangia;o__Haliangiales;f__Haliangiaceae;g__Haliangium;s__
OTU_1149	0	0	0	0	0	0.000114508	0	7.63388e-05	3.81694e-05	3.81694e-05	0.000152678	0	3.81694e-05	0	0	0	0	0	0	0	k__Bacteria;p__Proteobacteria;c__Gammaproteobacteria;o__Burkholderiales;f__Nitrosomonadaceae;g__MND1;s__
OTU_1150	0	0	0	0	0	0	0	0.000114508	0	0.000114508	0.000114508	0	0	0	0	0	0	0	0	7.63388e-05	k__Bacteria;p__Acidobacteriota;c__Holophagae;o__Subgroup_7;f__;g__;s__
OTU_1151	0	0	0	0	0	0	0	0	0	0	0	0	0	0	0	0	0	0	0	0	k__Bacteria;p__Bacteroidota;c__Bacteroidia;o__Flavobacteriales;f__Flavobacteriaceae;g__Capnocytophaga;s__Capnocytophaga_sp_oral_clone_DZ074
OTU_1152	0	0	0	0	0	0	0	0	0	0	0	0	0	0	0	0	0	0	0	0	k__Bacteria;p__Proteobacteria;c__Gammaproteobacteria;o__Burkholderiales;f__TRA3-20;g__;s__
OTU_1153	0	0	0	0	0	0	0	0	0	0	0	0	0	0	0	0	0	0	0	0	k__Bacteria;p__Gemmatimonadetes;c__unidentified_Gemmatimonadetes;o__Gemmatimonadales;f__Gemmatimonadaceae;g__Roseisolibacter;s__
OTU_1154	0	0	0	0	0	0.000190847	0	0	0	0	0	0	0	0	0	0	0	0	0	0	k__Bacteria;p__NB1-j;c__;o__;f__;g__;s__
OTU_1155	0	0	0	0	0	0	0	0	0	0	0	0	3.81694e-05	0	0	3.81694e-05	0	0	0	0	k__Bacteria;p__unidentified_Bacteria;c__Clostridia;o__Oscillospirales;f__Ruminococcaceae;g__;s__
OTU_1156	0	0	0	0	0	0.00061071	0	3.81694e-05	7.63388e-05	0	0	0.000190847	0.000114508	0	0	0	0	0	0	0	k__Bacteria;p__Actinobacteriota;c__Actinobacteria;o__Micromonosporales;f__Micromonosporaceae;g__Luedemannella;s__
OTU_1157	0	0	0	0.000152678	0	0	7.63388e-05	0	0	0	0	0	0	0	3.81694e-05	0	0	0	0	0	k__Bacteria;p__Firmicutes;c__Clostridia;o__Clostridia_vadinBB60_group;f__;g__;s__
OTU_1158	0	0	0	0	0	0	0	0	0	0	0	0	3.81694e-05	0	0	0	0	0	0	0	k__Bacteria
OTU_1159	0	0	0	0	0.000458033	0	0	0	0	0	0	0	0	0	0	0	0	0	0	0	k__Bacteria;p__Actinobacteriota;c__Actinobacteria;o__Corynebacteriales;f__Dietziaceae;g__Dietzia
OTU_1160	0	0	0	0	3.81694e-05	0	0	0	0	0	0	0	0	0	0	0	0	0	0	0	k__Bacteria;p__Chloroflexi;c__Chloroflexia;o__Thermomicrobiales;f__JG30-KF-CM45;g__;s__
OTU_1161	0	0	0	0	0	0	0	0	0	0	0	0	0	0	0	0	0	0	0	0	k__Bacteria;p__Proteobacteria;c__Gammaproteobacteria;o__unidentified_Gammaproteobacteria;f__unidentified_Gammaproteobacteria;g__Acidibacter;s__bacterium_Ellin5264
OTU_1162	0	0	0	0	0	0.000992404	0	0	0	0	0	0	0.000305355	0	0	0	0	0	0	0	k__Bacteria;p__Acidobacteriota;c__Subgroup_22;o__;f__;g__;s__
OTU_1163	0	0	0	7.63388e-05	0.000725219	0	0	0	0	0	0	0	0	0	0	0	0	0	0	0	k__Bacteria;p__Proteobacteria;c__Gammaproteobacteria;o__Burkholderiales;f__Rhodocyclaceae;g__Candidatus_Accumulibacter;s__
OTU_1164	0	0	0	0	0	0	0	0	0	0	0	0	0	0	0	0	0	0	0	0	k__Bacteria;p__Latescibacterota;c__;o__;f__;g__;s__
OTU_1165	0	0	0	0	0	0	0	0	0	0	0	0	0	0	0	0	0	0	0	0	k__Bacteria;p__Proteobacteria;c__Gammaproteobacteria;o__Burkholderiales;f__B1-7BS;g__;s__
OTU_1166	0	0	0	0	0	0	0	0	0	0	0	0	0	0	0	0	0	0	0	0	k__Bacteria
OTU_1167	0	0	0	0	0	0	0	0	0	0	0	0	0	0	0	0	0	0	0	0	k__Bacteria;p__unidentified_Bacteria;c__Saccharimonadia;o__Saccharimonadales;f__;g__;s__
OTU_1168	0	0	0	0	0	0	0	0	0	0	0	0	0	0	0	0	0	0	0	0	k__Bacteria;p__unidentified_Bacteria;c__unidentified_Bacteria;o__Gemmatimonadales;f__Gemmatimonadaceae;g__;s__
OTU_1169	0	0	0	0	0	0	0	3.81694e-05	3.81694e-05	7.63388e-05	3.81694e-05	0	0	0	0	0	0	0	0	0	k__Archaea;p__Crenarchaeota;c__Nitrososphaeria;o__Nitrosopumilales;f__Nitrosopumilaceae;g__Candidatus_Nitrosotenuis;s__
OTU_1170	0	0	0	0	0	0	0	3.81694e-05	0	0	7.63388e-05	0	0	0	0	0	0	0	0	0	k__Bacteria;p__unidentified_Bacteria;c__Gammaproteobacteria;o__Xanthomonadales;f__Xanthomonadaceae;g__unidentified_Xanthomonadaceae;s__Luteimonas_sp_JM171
OTU_1171	0	0	0	0	0	0	0	0	0	0	0	0	0	0	0	0	0	0	0	0	k__Bacteria;p__Firmicutes;c__Clostridia
OTU_1172	0	0	0	0	0	0	0	0	3.81694e-05	0	0	0.000114508	0	0	0	0	0	0	0	0	k__Bacteria;p__Acidobacteriota;c__Acidobacteriae;o__Bryobacterales;f__Bryobacteraceae;g__Bryobacter;s__
OTU_1173	0	0	0	0	0	0	0	0	0	0	0	0.000801557	0	0	0	0	0	0	0	0	k__Bacteria;p__Acidobacteriota;c__Blastocatellia;o__Pyrinomonadales;f__Pyrinomonadaceae;g__RB41;s__
OTU_1174	0	0	0	0	0	0	0	0	0	0	0	0	0	0	0	0	0	0	0	0	k__Bacteria
OTU_1175	0	0	0	0	0	0	0	0	0	0	0	0	0	0	0	0	0	0	0	0	Unknown
OTU_1176	0	0	0	0	0	0	0	3.81694e-05	3.81694e-05	3.81694e-05	0	0	0	0	0	0	0	0	0	0	k__Bacteria;p__unidentified_Bacteria;c__Alphaproteobacteria;o__;f__;g__;s__
OTU_1177	0	0	0	0	0	0	0	0	0	0	0	0	0	0	0	0	0	0	0	0	k__Bacteria;p__Firmicutes;c__Clostridia;o__unidentified_Clostridia;f__Hungateiclostridiaceae;g__Fastidiosipila;s__
OTU_1178	0	0	0.000114508	0	0	0.000114508	0	0	0	0	0	0	0.000267186	0	0	0	0.000190847	0	0	0	k__Bacteria;p__Proteobacteria;c__Gammaproteobacteria;o__Burkholderiales;f__Alcaligenaceae;g__Bordetella
OTU_1179	0	0	0	0	0	0	0	0	0	0	0	0	0	0	0	0	0	0	0	0	k__Bacteria
OTU_1180	0	0	0	0	0	0	0	0	0	0	0	0	0	0	0	0	0	0	0	0.000114508	k__Bacteria;p__unidentified_Bacteria;c__Gammaproteobacteria;o__Methylococcales;f__Methylococcaceae;g__;s__
OTU_1181	0	0	0	0	0	0.000839727	0	0	0	0	0	0	0	0	0	0	0	0	0	0	k__Bacteria;p__Proteobacteria;c__Gammaproteobacteria;o__Acidiferrobacterales;f__Acidiferrobacteraceae;g__Sulfurifustis;s__
OTU_1182	0	0	0	0	0	7.63388e-05	0	0	0	0	0	0	0	0	0	0	0	0	0	0	k__Bacteria;p__Acidobacteriota;c__Holophagae;o__Subgroup_7;f__;g__;s__
OTU_1183	0	0	0	0	0	0	0	0	0	0	0	0	0	0	0	0	0	0	0	0	k__Bacteria;p__Firmicutes;c__Bacilli;o__Erysipelotrichales;f__Erysipelotrichaceae;g__Erysipelothrix
OTU_1184	0	0	0	3.81694e-05	0	0	0	0	0	0	0	0	0	0	0	0	0	0	0	0	k__Bacteria;p__Firmicutes;c__Clostridia;o__Clostridia_vadinBB60_group;f__;g__;s__
OTU_1185	0	0	0	0	0	0	0	0	0	0	0	0	0	0	0	0	0	0	0	0	k__Bacteria;p__Proteobacteria;c__Gammaproteobacteria;o__Pseudomonadales;f__Moraxellaceae;g__Acinetobacter
OTU_1186	0	0	0	0	0	0	0	0	0	0	0	0	0	0	0	0	0	0	0	0	k__Bacteria;p__Bacteroidota;c__Bacteroidia;o__Sphingobacteriales;f__env.OPS_17;g__;s__
OTU_1187	0	0	0	0	0	0	0	0	0	0	0	0	0.00061071	0	0	0	0	0	0	0	k__Bacteria;p__Desulfobacterota;c__Desulfuromonadia;o__MA-28-I98C;f__;g__;s__
OTU_1188	0	0	0	0	0	0	0	0	0	0	0	3.81694e-05	0	0	0	0	0	0	0	0	k__Bacteria;p__Firmicutes;c__Clostridia;o__Lachnospirales;f__Lachnospiraceae;g__Lachnoclostridium;s__Lachnoclostridium_sp_YL32
OTU_1189	0	0	0	0	0	0	0	0	0	0	0	0	0	0	0	0	0	0	0	0	k__Bacteria;p__Bacteroidota;c__Bacteroidia;o__Sphingobacteriales;f__env.OPS_17;g__;s__
OTU_1190	0	0	0	0	0	0	0	0	0	0	0	0	0	0	0	0	0	0	0	0	k__Bacteria;p__Gemmatimonadetes;c__unidentified_Gemmatimonadetes;o__Gemmatimonadales;f__Gemmatimonadaceae;g__Gemmatimonas;s__
OTU_1191	0	0	0	0	0	0	0	7.63388e-05	0	0	0	0	0	0	0	0	0	0	0	0.000267186	k__Bacteria;p__Bacteroidota;c__Ignavibacteria;o__Ignavibacteriales;f__PHOS-HE36;g__;s__
OTU_1192	0	0	0	0	0	0	0	0	0	0	0	0	0	0	0	0	0	0	0	0	k__Bacteria;p__unidentified_Bacteria;c__Clostridia;o__Oscillospirales;f__Ruminococcaceae;g__;s__
OTU_1193	0	0	0	0	0	0	0	0	0	0	0	0	0	0	0	0	0	0	0	0	k__Bacteria;p__Actinobacteriota;c__Coriobacteriia;o__Coriobacteriales;f__Atopobiaceae;g__Olsenella;s__Olsenella_scatoligenes
OTU_1194	0	0	0	0	0.000381694	0	0	0	0	0	0	3.81694e-05	0	0	0	0	0	0.000190847	0	0.000114508	k__Bacteria;p__Bacteroidota;c__Bacteroidia;o__Bacteroidales;f__Rikenellaceae;g__Rikenellaceae_RC9_gut_group;s__
OTU_1195	0	0	0	0	0	0	0	0	0	0	0	0	0.000419863	0	0	0	0	0	0	0	k__Bacteria;p__unidentified_Bacteria;c__Alphaproteobacteria;o__Reyranellales;f__Reyranellaceae
OTU_1196	0	0	0	0	0	0	0	0	0	0	0	0	0	0	0	0	0	0	0	0	k__Bacteria;p__Firmicutes;c__Bacilli;o__Lactobacillales;f__Streptococcaceae;g__Streptococcus;s__Streptococcus_mutans
OTU_1197	0	0	0	0	0	0	0	0	7.63388e-05	3.81694e-05	0.000114508	0	7.63388e-05	0	0	0	0	0	0	0.000534372	k__Bacteria;p__Actinobacteriota;c__Thermoleophilia;o__Gaiellales;f__Gaiellaceae;g__Gaiella;s__
OTU_1198	0	0	0	0	0	0	0	7.63388e-05	0.000114508	3.81694e-05	7.63388e-05	0	0	0	0	0	0	0	0	0	k__Bacteria;p__Proteobacteria;c__Alphaproteobacteria;o__Caulobacterales;f__Hyphomonadaceae;g__SWB02;s__
OTU_1199	0	0	0	0	0	3.81694e-05	0	0	0	0	3.81694e-05	0	0	0	0	0	0	0	0	0	k__Bacteria;p__Armatimonadota;c__Fimbriimonadia;o__Fimbriimonadales;f__Fimbriimonadaceae;g__;s__
OTU_1200	0	0	0	0	0	0	0	0	0	0	0	0	0	0	0	0	0	0	0	0	k__Bacteria;p__Nitrospirota;c__Nitrospira;o__Nitrospirales;f__Nitrospiraceae;g__;s__
OTU_1201	7.63388e-05	0	0	3.81694e-05	0	3.81694e-05	3.81694e-05	0	0	0	0	0	0	0	0	0	0	0	0	3.81694e-05	k__Bacteria;p__unidentified_Bacteria;c__Clostridia;o__Lachnospirales;f__Lachnospiraceae;g__;s__
OTU_1202	0	0	0	0	0	0	0	0	0	0	0	0	0	0	0	0	0	0	0	0.000190847	k__Bacteria;p__Actinobacteriota;c__Actinobacteria;o__Streptosporangiales;f__Nocardiopsaceae;g__Thermobifida;s__
OTU_1203	0	0	0	3.81694e-05	0	0	0	0	0	0	0	0	0	0	0	0	0	0	0	3.81694e-05	k__Bacteria;p__Proteobacteria;c__Gammaproteobacteria;o__Burkholderiales;f__Sutterellaceae;g__Parasutterella;s__Parasutterella_secunda
OTU_1204	0	0	0	0	0	0	0	0	0	0	0	0	0.000419863	0	0	0	0	0	0	0	k__Bacteria;p__Proteobacteria;c__Alphaproteobacteria;o__Rhodobacterales;f__Rhodobacteraceae;g__Limibaculum;s__
OTU_1205	0	0	0	0	0	0	0	0	0	0	0	0	0	0	0	0	0	0	0	0	k__Bacteria;p__Acidobacteriota;c__Acidobacteriae;o__Bryobacterales;f__Bryobacteraceae;g__Bryobacter;s__
OTU_1206	0	0	0	0	3.81694e-05	0	0	0	0	0	0	0	0	0	0	0	0	0	0	0	k__Bacteria;p__Proteobacteria;c__Gammaproteobacteria;o__Burkholderiales;f__Rhodocyclaceae;g__Dechloromonas;s__
OTU_1207	0	0	0	0	0	0	0	0	0	0	0	0	0	0	0	0	0	0	0	7.63388e-05	k__Bacteria;p__unidentified_Bacteria;c__Acidimicrobiia;o__Actinomarinales;f__;g__;s__
OTU_1208	0	0	0	0.000152678	0	0	0	0	0	0	0	0.000152678	0	0	0	0	0	0.000152678	0	3.81694e-05	k__Bacteria;p__Bacteroidota;c__Bacteroidia;o__Bacteroidales;f__Muribaculaceae;g__;s__
OTU_1209	0	0	0	0	0	0	0	0	0	0	0	0	0	0	0	0	0	0	0	0	k__Bacteria;p__Verrucomicrobiota;c__Verrucomicrobiae;o__Pedosphaerales;f__Pedosphaeraceae;g__;s__
OTU_1210	0	0	0	0	0	0	0	0	0	0	0	0	3.81694e-05	0	0	0	0	0	0	0	k__Bacteria;p__unidentified_Bacteria;c__unidentified_Bacteria;o__unidentified_Bacteria;f__unidentified_Bacteria;g__unidentified_Bacteria;s__delta_proteobacterium_WX81
OTU_1211	0	0	0	0	0	0	0	0	0	0	0	0	0	0	0	0	0	0	0	0	k__Bacteria
OTU_1212	0	0	0	0	0	0	0	0	0	0	0	0	0	0	0	0	0	0	0	0	k__Bacteria;p__Gemmatimonadetes;c__unidentified_Gemmatimonadetes;o__Gemmatimonadales;f__Gemmatimonadaceae;g__Roseisolibacter
OTU_1213	0	0	0	0	0	0	0	0	0	0	0	0	0	0	0	0	0	0	0	0	k__Bacteria
OTU_1214	0	0	0	0	0	0	0	0	0	0	0	0	0	0	0	0	0	0	0	0	k__Bacteria;p__Firmicutes;c__Limnochordia;o__Limnochordales;f__Limnochordaceae;g__;s__
OTU_1215	0	0	0	0	0	0	0	0	0	0	0	0	0	0	0	0	0	0	0	0.000229016	k__Bacteria;p__Bacteroidota;c__Bacteroidia;o__Flavobacteriales;f__NS9_marine_group
OTU_1216	0	0	0	0	0	3.81694e-05	0	0	3.81694e-05	0	3.81694e-05	0	0	0	0	0	0	0	0	3.81694e-05	k__Bacteria;p__Myxococcota;c__bacteriap25;o__;f__;g__;s__
OTU_1217	0	0	0	0	3.81694e-05	0	0	0	0	0	0	0	0	0	0	0	0	0	0	0	k__Bacteria;p__unidentified_Bacteria;c__Clostridia;o__Oscillospirales;f__Butyricicoccaceae;g__;s__
OTU_1218	0	0	0	0	0	0	0	0	0	0	0	0	0	0	0	0	0	0	0	0	k__Bacteria;p__Firmicutes;c__Bacilli;o__Paenibacillales;f__Paenibacillaceae;g__Paenibacillus
OTU_1219	0	0	0	0	0	0	0	0	0	0	0	0	0	0	0	0	0	0	0	0	k__Bacteria;p__Proteobacteria
OTU_1220	0	0	0	0	0	0	0	0	0	0	0	0	0	0	0	0	0	0	0	0	k__Bacteria;p__unidentified_Bacteria;c__Saccharimonadia;o__Saccharimonadales
OTU_1221	0	0	0	0	0	0	0	0	0	0	0	0	0	0	0	0	0	0	0	0	k__Bacteria;p__Actinobacteriota;c__Acidimicrobiia;o__IMCC26256;f__;g__;s__
OTU_1222	0	0	0	0	0	0	0	0	0	0	0	0	0	0	0	0	0	0	0	0	k__Bacteria;p__Proteobacteria;c__Gammaproteobacteria;o__Xanthomonadales;f__Rhodanobacteraceae
OTU_1223	0	0	0	0	0	0.000229016	0	0	0	0	0	0	0.00118325	0	0	0	0	0	0	0	k__Bacteria;p__Myxococcota;c__Myxococcia;o__Myxococcales;f__Anaeromyxobacteraceae;g__Anaeromyxobacter;s__
OTU_1224	0	0	0	0	0	0	0	0	0	0	0	0	0	0	0	0	0	0	0	0	k__Bacteria;p__Bacteroidota;c__Bacteroidia;o__Bacteroidales;f__Rikenellaceae;g__Rikenellaceae_RC9_gut_group;s__
OTU_1225	0	0	0	0	0	0	0	0	0	0	0	0	0	0	0	0	0	0	0	0	k__Bacteria;p__Armatimonadota;c__Fimbriimonadia;o__Fimbriimonadales;f__Fimbriimonadaceae;g__;s__
OTU_1226	0	0	0	0	0	0	0	0	0	0	0	0.000114508	0	0	0	0	0	0	0	0	k__Bacteria;p__Firmicutes;c__Clostridia;o__Peptostreptococcales-Tissierellales;f__Anaerovoracaceae;g__[Eubacterium]_nodatum_group;s__
OTU_1227	0	0	0	0	0	0	0	0	0	0	0	0	0	0	0	0	0	0	0	0	k__Bacteria
OTU_1228	0	0	0	0	0	0	0	0	0	0	0	0	0	0	0	0	0	0	0	0	k__Bacteria;p__Chloroflexi;c__Chloroflexia;o__Thermomicrobiales;f__Thermomicrobiaceae;g__Sphaerobacter;s__
OTU_1229	3.81694e-05	7.63388e-05	0	0	0	0	0	0	0	0	0	0	0	0.000458033	0.000152678	0	0	0	0	0	k__Bacteria;p__Firmicutes;c__Clostridia;o__Lachnospirales;f__Lachnospiraceae;g__Roseburia;s__
OTU_1230	0	0	0	0	0	0	0	0	0	0	0	0	0	0	0	0	0	0	0	0	k__Bacteria;p__Proteobacteria;c__Gammaproteobacteria;o__Burkholderiales
OTU_1231	0	0	0	7.63388e-05	0	0	0	0	0	0	0	3.81694e-05	0	0	0	0	0	3.81694e-05	0	3.81694e-05	k__Bacteria;p__Firmicutes;c__Clostridia;o__Oscillospirales;f__Ruminococcaceae;g__Fournierella;s__
OTU_1232	0	0	0	0	0	0	0	0	0	0	0	7.63388e-05	0	0	0	0	0	0	0	0	k__Bacteria;p__Firmicutes;c__Clostridia;o__Christensenellales;f__Christensenellaceae;g__Christensenellaceae_R-7_group;s__
OTU_1233	0	0	0	0	0	0	0	0	0	0	0	0	0	3.81694e-05	0.000114508	0	0	0	0	0	k__Bacteria;p__Bacteroidota;c__Bacteroidia;o__Bacteroidales;f__Muribaculaceae;g__;s__
OTU_1234	0	0	0	0	0	0	0	0	0	0	0	0	0	0	0	0	0	0	0	0	k__Bacteria;p__Chloroflexi;c__Ktedonobacteria;o__C0119;f__;g__;s__
OTU_1235	0	0	0	0	0	7.63388e-05	0	0	0	0	0	0	0	0	3.81694e-05	0	3.81694e-05	0	0	0	k__Bacteria
OTU_1236	0	0	0	0	0	0	0	0	0	0	0	0	0	0	0	0	0	0	0	0	Unknown
OTU_1237	0	0	0	0	0	0	0	0	0	0	0	0	0	0	0	0	0	0	0	0	k__Bacteria;p__Proteobacteria;c__Gammaproteobacteria;o__Burkholderiales;f__Oxalobacteraceae
OTU_1238	0	0	0	0	0	0	0	0	0	3.81694e-05	0.000190847	0	0	0	0	0	0	0	0	0	k__Bacteria;p__Proteobacteria;c__Alphaproteobacteria;o__Caulobacterales;f__Hyphomonadaceae;g__Hirschia;s__
OTU_1239	0	0	0	0	0	0	0	7.63388e-05	0	0	7.63388e-05	0	0	0	0	0	0	0	0	0	k__Bacteria;p__Proteobacteria;c__Gammaproteobacteria;o__Salinisphaerales;f__Solimonadaceae;g__Polycyclovorans;s__
OTU_1240	0	0	0	0	0	0	0	0	0	0	0	0	0	0	0	0	0	0	0	0	k__Bacteria;p__Firmicutes;c__Bacilli;o__RF39;f__;g__;s__
OTU_1241	0	0	0	0	0	0	0	0	3.81694e-05	7.63388e-05	7.63388e-05	0	0	0	0	0	0	0	0	0.000114508	k__Bacteria;p__Actinobacteriota;c__MB-A2-108;o__;f__;g__;s__
OTU_1242	0	0	0	0	0	0	0	0	0	0	0	0	0	0	0	0	0	0	0	0	k__Bacteria;p__Spirochaetota;c__Spirochaetia;o__Spirochaetales;f__Spirochaetaceae;g__Treponema;s__Treponema_denticola
OTU_1243	0	0	0	0	0	0	0	0	7.63388e-05	0	3.81694e-05	0	0.000190847	0	0	0	0	0	0	0	k__Bacteria;p__Methylomirabilota;c__Methylomirabilia;o__Rokubacteriales;f__;g__;s__
OTU_1244	0	0	0	0	0	0	0	0	0	0	0	0	0	0	0	0	0	0	0	0	k__Bacteria;p__unidentified_Bacteria;c__Thermoleophilia;o__Gaiellales;f__;g__;s__
OTU_1245	0	0	0	0	0	0	0	0.000152678	7.63388e-05	3.81694e-05	3.81694e-05	0	0	0	0	0	0	0	0	0	k__Archaea;p__Crenarchaeota;c__Nitrososphaeria;o__Nitrosopumilales;f__Nitrosopumilaceae;g__Nitrosarchaeum;s__
OTU_1246	0	0	0	0	0	0	0	0	0	0	0	0	0	0	0	0	0	0	0	0	k__Bacteria;p__Firmicutes;c__Clostridia;o__Peptostreptococcales-Tissierellales;f__Anaerovoracaceae;g__Family_XIII_UCG-001;s__Eubacterium_sp_oral_clone_CK047
OTU_1247	0	0	0	0	0	0	0	3.81694e-05	3.81694e-05	0	3.81694e-05	0	0	0	0	0	0	0	0	0	k__Bacteria;p__Proteobacteria;c__Alphaproteobacteria;o__Reyranellales;f__Reyranellaceae;g__Reyranella;s__
OTU_1248	0	0	0	0	0	0	0	0	0	0	0	0.000152678	0	0	0	0	0	0	0	0	k__Bacteria;p__Acidobacteriota;c__Blastocatellia;o__Blastocatellales;f__Blastocatellaceae;g__Aridibacter;s__
OTU_1249	0	0	0	0	0	0	0	0	0	0	0	3.81694e-05	0	0	0	0	0	0.000114508	0	0	k__Bacteria;p__Proteobacteria;c__Gammaproteobacteria;o__Pasteurellales;f__Pasteurellaceae;g__Actinobacillus;s__Actinobacillus_porcitonsillarum
OTU_1250	0	0	0	0	0	0	0	0	0	0	0	0	0	0	0	0	0	0	0	0	k__Bacteria
OTU_1251	0	0	0	0	0	0	0	0	0	0	0	0	0	0	0	0	0	0	0	0	k__Bacteria;p__Deinococcota;c__Deinococci;o__Deinococcales;f__Deinococcaceae;g__Deinococcus;s__Deinococcus_sp_Lab-1
OTU_1252	0	0	0	0	0	0	0	0	0	0	0	0	0.000343525	0	0	0	0	0	0	0	k__Bacteria;p__Desulfobacterota;c__Desulfovibrionia;o__Desulfovibrionales;f__Desulfomicrobiaceae;g__Desulfomicrobium
OTU_1253	0	0	0	0	0	0	0	0	0	0	0	0	0	0	0	0	0	0	0	0	k__Bacteria
OTU_1254	0	0	0	0	0	0	0	3.81694e-05	0	0	0	0	0	0	0	0	0	0	0	0	k__Bacteria;p__Nitrospirota;c__Nitrospira;o__Nitrospirales;f__Nitrospiraceae;g__;s__
OTU_1255	0	0	0	0	0	0	0	0	0	0	0	0	0	0	0	0	0	0	0	0	k__Bacteria;p__Proteobacteria;c__Gammaproteobacteria;o__Legionellales;f__Legionellaceae;g__Legionella
OTU_1256	0	0	0	0	0	0	0	0	0	0	0	0	0	0	0	0	3.81694e-05	0	0	0	k__Bacteria
OTU_1257	0	0	0	0	0	0	0	0	0	0	0	0	0	0	0	0	0	0	0	0	k__Bacteria;p__Bacteroidota;c__Bacteroidia;o__Bacteroidales;f__p-251-o5;g__;s__
OTU_1258	0	0	0	0	0	0	0	0	0	0	0	0	0	0	0	0	0	0	0	0	k__Bacteria;p__Proteobacteria;c__Gammaproteobacteria;o__Enterobacterales;f__Erwiniaceae;g__Pantoea;s__Mixta_calida
OTU_1259	0	0	0	0	0	0	0	0	0	0	0	0	0	0	0	0	0	0	0	0	k__Bacteria;p__Chloroflexi;c__Chloroflexia;o__Chloroflexales;f__Herpetosiphonaceae;g__Herpetosiphon;s__
OTU_1260	0	0	0	0	0	0.000114508	0	0	0	0	0	0	0.000763388	0	0	0	0	0	0	0	k__Bacteria;p__MBNT15
OTU_1261	0	0	3.81694e-05	0	0	3.81694e-05	7.63388e-05	0	0	0	0	0	0	3.81694e-05	3.81694e-05	0	0	0	0	0	k__Bacteria;p__Bacteroidota;c__Bacteroidia;o__Bacteroidales;f__Muribaculaceae;g__;s__
OTU_1262	0	0	0	3.81694e-05	0	0	0	0	0	0	0	7.63388e-05	0	0	0	0	0	0.000114508	0	0	k__Bacteria;p__Bacteroidota;c__Bacteroidia;o__Bacteroidales;f__Prevotellaceae;g__Prevotellaceae_UCG-004;s__
OTU_1263	0	0	0	0	0	0	0	0	0	0	0	0	0	0	0	0	0	0	0	0	k__Bacteria;p__Actinobacteriota;c__Actinobacteria;o__Corynebacteriales;f__Corynebacteriaceae;g__Corynebacterium;s__Corynebacterium_propinquum
OTU_1264	0	0	0	0	0	7.63388e-05	0	3.81694e-05	3.81694e-05	7.63388e-05	7.63388e-05	0	0.000458033	0	0	0	0	0	0	0	k__Bacteria;p__Proteobacteria;c__Gammaproteobacteria;o__CCD24;f__;g__;s__
OTU_1265	0	0	0	0	0	0	0	0	0	0	0	0	0	0	0	0	0	0	0	0	k__Bacteria;p__Bacteroidota;c__Bacteroidia;o__Bacteroidales;f__Rikenellaceae;g__Rikenellaceae_RC9_gut_group;s__
OTU_1266	0	0	0	0	0	0	0	0	0	0	0	0	0.000305355	0	0	0	0	0	0	0	k__Bacteria;p__Bacteroidota;c__Bacteroidia;o__Chitinophagales;f__Chitinophagaceae;g__Dinghuibacter;s__
OTU_1267	0	0	0	0	0	0	0	0	0	0	0	0	0	0	0	0	0	0	0	3.81694e-05	k__Bacteria;p__Myxococcota;c__Polyangia;o__Nannocystales;f__Nannocystaceae;g__Nannocystis
OTU_1268	0	0	0	0	0	0	0	0	0	0	0	0	0	0	0	0	0	0	0	0	k__Bacteria;p__Acidobacteriota;c__Acidobacteriae;o__Subgroup_2;f__;g__;s__
OTU_1269	0	0	0	0	0	0	0	0	0	0	0	0	0	0	0	0	0	0	0	0.000381694	k__Bacteria;p__Actinobacteriota;c__Actinobacteria;o__Streptosporangiales;f__Streptosporangiaceae;g__Thermopolyspora;s__
OTU_1270	0	0	0	0	0	0	0	0	0	0	0	0	0	0	0	0	0	0	0	0	k__Bacteria
OTU_1271	0	0	3.81694e-05	3.81694e-05	0	0.000152678	7.63388e-05	0	0	0	0	0	0	0	0	0	0	0	0	0	k__Bacteria;p__Firmicutes;c__Clostridia;o__Clostridia_vadinBB60_group;f__;g__;s__
OTU_1272	0	0	0	0	0	0	0	0	0	0	0	0	0	0	0	0	0	0	0	0	k__Bacteria;p__Firmicutes;c__Clostridia;o__Oscillospirales;f__UCG-010;g__;s__
OTU_1273	0	0	0	0	0	0	0	0	0	0	0	0	0	0	0	0	0	0	0	0	k__Bacteria;p__Acidobacteriota;c__Acidobacteriae;o__Subgroup_13;f__;g__;s__
OTU_1274	0	0	0	0	0	0	0	0	0	0	0	0	0	0	0	0	0.00316806	0	0	0	k__Bacteria;p__Firmicutes;c__Clostridia;o__Lachnospirales;f__Lachnospiraceae;g__Anaerostipes;s__Anaerostipes_hadrus
OTU_1275	0	0	0	0	0	0	0	0	0	0	0	0	0.000152678	0	0	0	0	0	0	0	k__Bacteria;p__Acidobacteriota;c__Acidobacteriae;o__PAUC26f;f__;g__;s__
OTU_1276	0	0	0	0	0	0	0	0	0	0	0	0	0	0	0	0	0	0	0	0	k__Bacteria;p__Chloroflexi;c__Anaerolineae;o__SBR1031;f__A4b;g__;s__
OTU_1277	0	0	0	0	0	0	0	0	0	0	0	0	0	0	0	0	0	0	0	0	k__Bacteria;p__Proteobacteria;c__Gammaproteobacteria;o__Burkholderiales;f__Comamonadaceae;g__Delftia;s__Delftia_tsuruhatensis
OTU_1278	0	0	0	0	0	0	0	0	0	0	0	0	0	0	0	0	0	0	0	0	k__Bacteria;p__Bacteroidota;c__Bacteroidia;o__Bacteroidales;f__Bacteroidaceae;g__Bacteroides;s__
OTU_1279	0	0	0	7.63388e-05	0	0	0	0	0	0	0	7.63388e-05	0	0	0	0	0	3.81694e-05	0	0	k__Bacteria;p__Firmicutes;c__Clostridia;o__Christensenellales;f__Christensenellaceae;g__Christensenellaceae_R-7_group;s__
OTU_1280	0	0	0	0	0	0	0	0	0	0	0	0	0	0	0	0	0	0	0	0	k__Bacteria;p__Proteobacteria;c__Gammaproteobacteria;o__Burkholderiales;f__SC-I-84
OTU_1281	0	0	0	0	0	0	0	0	0	7.63388e-05	0	0	0	0	0	0	0	0	0	0	k__Bacteria;p__unidentified_Bacteria;c__Thermoleophilia;o__Gaiellales;f__;g__;s__
OTU_1282	0	0	0	0	0	0	0	0	0	0	0	0	0.000381694	0	0	0	0	0	0	0	k__Bacteria;p__Bacteroidota;c__Bacteroidia;o__Flavobacteriales;f__Flavobacteriaceae;g__unidentified_Flavobacteriaceae;s__Robertkochia_marina
OTU_1283	0	0	0	0	0	0	0	0	3.81694e-05	0	0	0	0	0	0	0	0	0	0	0	k__Bacteria;p__Firmicutes;c__Bacilli;o__Bacillales;f__Planococcaceae;g__Solibacillus
OTU_1284	0	0	0	0	0	0	0	0	0	0	0	0	0	0	0	0	0	0	0	0	k__Bacteria;p__Firmicutes;c__Bacilli;o__Staphylococcales;f__Staphylococcaceae;g__Aliicoccus;s__
OTU_1285	0	0	0	0	0	0	0	0	0	0	0	0	0	0	0	0	0	0	0	0	k__Bacteria;p__Firmicutes;c__Clostridia;o__Peptostreptococcales-Tissierellales;f__Anaerovoracaceae;g__Family_XIII_AD3011_group;s__
OTU_1286	0	0	0	0	0	0	0	3.81694e-05	0	0	0	0.000725219	7.63388e-05	0	0	0	0	0	0	0	k__Bacteria
OTU_1287	0	0	0	0	0	0	0	7.63388e-05	0	3.81694e-05	3.81694e-05	0	0	0	0	0	0	0	0	0	k__Bacteria;p__Acidobacteriota;c__Acidobacteriae;o__Bryobacterales;f__Bryobacteraceae;g__Bryobacter;s__
OTU_1288	0	0	0	0	0	0.000458033	0	0.000114508	0	3.81694e-05	0	0	0.000190847	0	0	0	0	0	0	0	k__Bacteria;p__Proteobacteria;c__Gammaproteobacteria;o__Burkholderiales;f__Nitrosomonadaceae;g__MND1;s__
OTU_1289	0	0	3.81694e-05	3.81694e-05	0	0	0	0	0	0	0	0	0	0	0	0	0	0	0	0	k__Bacteria;p__Firmicutes;c__Clostridia;o__Oscillospirales
OTU_1290	0	0	0	0	0	0	0	0	0	0	0	0	0	0	0	0	0	0	0	0	k__Bacteria;p__Actinobacteriota;c__Actinobacteria;o__Bifidobacteriales;f__Bifidobacteriaceae;g__Scardovia;s__Scardovia_wiggsiae
OTU_1291	0	0	0	0	0	0	0	0	0	0	0	0	0	0	0	0	0	0	0	0	k__Bacteria;p__unidentified_Bacteria;c__Acidimicrobiia;o__Microtrichales;f__Ilumatobacteraceae;g__;s__
OTU_1292	0	0	0	0	0	0	0	0	0	0	0	0	0	0	0	0	0	0	0	0	k__Bacteria;p__Firmicutes;c__Bacilli;o__Erysipelotrichales;f__Erysipelatoclostridiaceae;g__Erysipelotrichaceae_UCG-003;s__
OTU_1293	0	0	0	0	0	0	0	0	0	0	3.81694e-05	0	3.81694e-05	0	0	0	0	0	0	0	k__Bacteria;p__Myxococcota;c__Polyangia;o__Polyangiales;f__BIrii41;g__;s__
OTU_1294	0	0	0	0	0	0	0	3.81694e-05	0	0	0	0	0	0	0	0	0	0	0	0	k__Bacteria;p__Chloroflexi;c__Chloroflexia;o__Thermomicrobiales;f__JG30-KF-CM45;g__;s__
OTU_1295	0	0	0	0	0	0	0	0	0	0	0	0	0.000725219	0	0	0	0	0	0	0	k__Bacteria;p__unidentified_Bacteria;c__Gammaproteobacteria;o__Burkholderiales;f__Sutterellaceae;g__;s__
OTU_1296	0	0	0	0	0	0	0	0	0	0	0	0	0	0	0	0	0	0	0	0	k__Bacteria;p__unidentified_Bacteria;c__Saccharimonadia;o__Saccharimonadales
OTU_1297	0	0	0	0	0	0	0	0	0	0	0	0	0.000381694	0	0	0	0	0	0	0	k__Bacteria;p__unidentified_Bacteria;c__Bacteroidia;o__Cytophagales;f__Cyclobacteriaceae;g__;s__
OTU_1298	3.81694e-05	0	0	0	0	0	7.63388e-05	0	0	0	0	0	0	0	0	0.000305355	0	0	0	0	k__Bacteria;p__Bacteroidota;c__Bacteroidia;o__Bacteroidales;f__Rikenellaceae;g__Alistipes;s__
OTU_1299	0	0	0	0	0	0	0	0	0	0	0	0	0	0	0	0	0	0	0	0	k__Bacteria;p__unidentified_Bacteria;c__Bacteroidia;o__Chitinophagales;f__Chitinophagaceae;g__unidentified_Chitinophagaceae;s__Panacibacter_ginsenosidivorans
OTU_1300	0	0	0	0	0	0	0	0	0	0	0	0	0	0	0	0	0	0	0	0	k__Bacteria;p__unidentified_Bacteria;c__Alphaproteobacteria;o__Elsterales
OTU_1301	0	0	0	0	0	0	0	0	0	0	0	0	0	0	0	0	0	0	0	0	k__Bacteria;p__unidentified_Bacteria;c__Acidimicrobiia;o__Microtrichales;f__;g__;s__
OTU_1302	0	0	0	0	0	0	0	0	0	0	0	0	0	0	0	0	0	0	0	0.000343525	k__Bacteria;p__Desulfobacterota;c__Desulfobacteria;o__Desulfobacterales;f__Desulfosarcinaceae;g__Sva0081_sediment_group;s__
OTU_1303	0	0	0	0	0	0	0	0.000114508	0	7.63388e-05	0.000267186	0	0	0	0	0	0	0	0	0	k__Bacteria;p__Firmicutes;c__Bacilli;o__Bacillales;f__Bacillaceae
OTU_1304	0	0	0	0	0	0	0	0	0	0	0	0	0.000343525	0	0	0	0	0	0	0	k__Bacteria;p__unidentified_Bacteria;c__Gammaproteobacteria;o__unidentified_Gammaproteobacteria;f__unidentified_Gammaproteobacteria;g__;s__
OTU_1305	0	0	0	0	0	0	0	0	0	0	0	0	0	0	0	0	0	0.000152678	0	0.000114508	k__Bacteria;p__Chloroflexi;c__Dehalococcoidia;o__GIF3;f__;g__;s__
OTU_1306	0	0	0	0	0	0	0	0	0	0	0	0	0	0	0	0	0	0	0	0	k__Bacteria;p__Bacteroidota;c__Bacteroidia;o__Flavobacteriales;f__Crocinitomicaceae;g__Fluviicola;s__
OTU_1307	0	0	0	0.000458033	0	0	0	0	0	0	0	0	0	0	0	0	0	0	0	0	k__Bacteria;p__Actinobacteriota;c__Actinobacteria;o__Micrococcales;f__Demequinaceae;g__Demequina;s__Demequina_globuliformis
OTU_1308	0	0	0	0	0	0	0	0	0	0	0	0	0	0	0	0	0	0	0	0	k__Bacteria;p__Proteobacteria;c__Gammaproteobacteria;o__Thiotrichales;f__Thiotrichaceae;g__Thiothrix;s__
OTU_1309	0	0	0	0	0	0	0	0	0	0	0	0	0	0	0	0	0	0	0	0	k__Bacteria;p__unidentified_Bacteria;c__Chloroflexia;o__Chloroflexales;f__Roseiflexaceae;g__;s__
OTU_1310	0	0	0	0	0	0	0	0	0	0	0	7.63388e-05	7.63388e-05	0	0	0	0	0	0	0	k__Bacteria;p__Myxococcota;c__Myxococcia;o__Myxococcales;f__Myxococcaceae;g__Archangium;s__Archangium_gephyra
OTU_1311	0	0	0	0	0	0	0	0	0	0	0	0	0	0	0	0	0	0	0	0.000114508	k__Bacteria;p__Chloroflexi;c__Dehalococcoidia;o__Sh765B-AG-111;f__;g__;s__
OTU_1312	0	0	0	0	0	0	0	0	0	0	3.81694e-05	0	0	0	0	0	0	0	0	0.000114508	k__Bacteria;p__Proteobacteria;c__Gammaproteobacteria;o__Pseudomonadales;f__Pseudomonadaceae;g__Pseudomonas
OTU_1313	0	0	0	0.000114508	7.63388e-05	0	0	0	0	0	0	7.63388e-05	0	7.63388e-05	0	0	0	0	0	7.63388e-05	k__Bacteria;p__Firmicutes;c__Clostridia;o__Lachnospirales;f__Lachnospiraceae;g__Hungatella;s__
OTU_1314	0	0	0	0	0	0	0	0	0	0	0	0	0	0	0	0	0	0	0	0	k__Bacteria;p__Latescibacterota;c__;o__;f__;g__;s__
OTU_1315	0	0	0	0	0	0	0	0	0	0	7.63388e-05	0	0	0	0	0	0	0	0	0	k__Bacteria;p__Actinobacteriota;c__Actinobacteria;o__Corynebacteriales;f__Mycobacteriaceae;g__Mycobacterium;s__Mycolicibacterium_goodii
OTU_1316	0	0	0	0	0	0	0	0	0	0	0	0	0	0	0	0	0	0	0	0.000114508	k__Bacteria
OTU_1317	0	0	0	0	0	0	0	0	0	0	0	0	0	0	0	0	0	0	0	0	k__Bacteria;p__Chloroflexi;c__Chloroflexia;o__Thermomicrobiales;f__JG30-KF-CM45;g__;s__
OTU_1318	0	0	0	0	0	0	0	0	0	0	0	7.63388e-05	0	0	0	0.000114508	0	3.81694e-05	0	0	k__Bacteria;p__Proteobacteria;c__Gammaproteobacteria;o__Pseudomonadales;f__Moraxellaceae;g__Moraxella
OTU_1319	0	0	0	0	0	0	0	0	0	0	0	0	0	0	0	0	0	0	0	0	k__Bacteria;p__unidentified_Bacteria;c__Saccharimonadia;o__Saccharimonadales;f__WWH38;g__;s__
OTU_1320	0	0	0	0	0	0	0	0	3.81694e-05	7.63388e-05	0.000152678	0	0	0	0	0	0	0	0	0.000190847	k__Bacteria;p__unidentified_Bacteria;c__Thermoleophilia;o__Gaiellales;f__;g__;s__
OTU_1321	0	0	0	0	0	0	0	0	0	0	0	0	0	0	0	0	0	0	0	0	k__Bacteria;p__Cyanobacteria;c__Cyanobacteriia;o__Cyanobacteriales;f__Phormidiaceae;g__Tychonema_CCAP_1459-11B;s__
OTU_1322	0	0	0	0	0	0	0	0	0	0	0	0	0	0	0	0	0	0	0	0	k__Bacteria;p__Proteobacteria;c__Gammaproteobacteria;o__Burkholderiales
OTU_1323	0	0	0	0	0	0	0	0	0	0	0	0	0	0	0	0	0	0	0	0.000496202	k__Bacteria;p__Methylomirabilota;c__Methylomirabilia;o__Rokubacteriales;f__;g__;s__
OTU_1324	0	0	0	0	3.81694e-05	0	0	0	0	0	0	7.63388e-05	0	0	0	0	0	0.000114508	0	7.63388e-05	k__Bacteria;p__Firmicutes;c__Clostridia;o__Christensenellales;f__Christensenellaceae;g__Christensenellaceae_R-7_group;s__
OTU_1325	0	0	0	0	0	0	0	0	0	0	0	0	0	0	0	0	0	0	0	0	k__Bacteria;p__Actinobacteriota;c__Acidimicrobiia;o__IMCC26256;f__;g__;s__
OTU_1326	0	0	0	0	0	0.000725219	0	0.000114508	7.63388e-05	0	0	3.81694e-05	3.81694e-05	0	0	0	0	0	0	0	k__Bacteria;p__Actinobacteriota;c__Actinobacteria;o__Propionibacteriales;f__Nocardioidaceae;g__Marmoricola;s__Marmoricola_sp
OTU_1327	0	0	0	0	0	0	0	0	0	0	0	0	0	0	0	0	0	0	0	0	k__Bacteria
OTU_1328	0	0	0	0	0	0	0	0	0	0	0	0	0	0	0	0	0	0	0	0	k__Bacteria;p__Proteobacteria;c__Gammaproteobacteria;o__Burkholderiales;f__Burkholderiaceae;g__Ralstonia;s__Ralstonia_insidiosa
OTU_1329	0	0	0	0	0	0	0	3.81694e-05	0	0	0.000114508	0	0	0	0	0	0	0	0	0	k__Bacteria;p__Actinobacteriota;c__Actinobacteria;o__Micrococcales;f__Bogoriellaceae;g__Georgenia
OTU_1330	0	0	0	0	0	0	0	3.81694e-05	3.81694e-05	7.63388e-05	0	0.000572541	0	0	0	0	0	0	0	0.000114508	k__Bacteria;p__Acidobacteriota;c__Acidobacteriae;o__Bryobacterales;f__Bryobacteraceae;g__Bryobacter;s__
OTU_1331	0	0	0	0	0	0	0	0	0	0	0	0	0	0	0	0	0	0	0	0	k__Bacteria;p__unidentified_Bacteria;c__Saccharimonadia;o__Saccharimonadales;f__LWQ8;g__;s__
OTU_1332	0	0	0	0	0	0	0	0	0	0	0	0	0	0	0	0	0	0	0	0	k__Bacteria;p__Proteobacteria;c__Alphaproteobacteria;o__Rhizobiales;f__Xanthobacteraceae;g__Rhodoplanes;s__
OTU_1333	0	0	0	0	0.000305355	0	0	0	0	0	0	0	0	0	0	0	7.63388e-05	0	0	0	k__Bacteria;p__Actinobacteriota;c__Coriobacteriia;o__Coriobacteriales;f__Eggerthellaceae;g__DNF00809;s__
OTU_1334	0	0	0	0	0	0	0	0	0	0	0	0	0.000190847	0	0	0	0	0	0	0	k__Bacteria;p__Proteobacteria;c__Gammaproteobacteria;o__Burkholderiales;f__Gallionellaceae;g__Sideroxydans;s__
OTU_1335	0	0	0	0	0	0	0	0	0	0	0	0	0	0	0	0	0	0	0	0	k__Bacteria;p__Firmicutes;c__Bacilli;o__RF39;f__;g__;s__
OTU_1336	0	0	0	0	0	7.63388e-05	0	0	0	0	0	0	3.81694e-05	0	0	0	3.81694e-05	0	0	0	k__Bacteria;p__Firmicutes;c__Clostridia;o__Lachnospirales;f__Lachnospiraceae;g__GCA-900066575;s__
OTU_1337	0	0	0	0	0	0	0	0	0	0	0	0	0	0	0	0	0	0	0	0	k__Bacteria
OTU_1338	0	0	0	0	0	0	0	0	0	0	0	0	0	0	0	0	0	0	0	0	Unknown
OTU_1339	0	0	0	0	0	0	0	0	0	0	0	0	0	0	0	0	0	0.000381694	0	0	k__Bacteria;p__Chloroflexi;c__Dehalococcoidia;o__GIF9;f__AB-539-J10;g__SCGC-AB-539-J10;s__
OTU_1340	0	0	0	0	0	0	0	0	0	0	0	0	0	0	0.000114508	0	0	0	0	0	k__Bacteria;p__Firmicutes;c__Clostridia;o__Oscillospirales;f__Butyricicoccaceae;g__UCG-009;s__
OTU_1341	0	0	0	0	0	0	0	0	0	0	0	0	0	0	0	0	0	0	0	0	k__Bacteria;p__unidentified_Bacteria;c__Bacteroidia;o__Cytophagales;f__Microscillaceae;g__;s__
OTU_1342	0	0	0	0	0	0	0	0	0	0	0	0	0	0	0	0	0	0	0	0	k__Bacteria;p__Firmicutes;c__Bacilli;o__Alicyclobacillales;f__Alicyclobacillaceae;g__Tumebacillus;s__
OTU_1343	0	0	0	0	0	0	0	0	0	0	0	0	0.00125959	0	0	0	0	0	0	0	k__Bacteria;p__Myxococcota;c__Polyangia;o__Nannocystales;f__Nannocystaceae;g__;s__
OTU_1344	0	0	0	0	0	0	0	0	0	0	0	0	0	0	0	3.81694e-05	0	0	0	0	k__Bacteria;p__Firmicutes;c__Clostridia;o__Clostridia_vadinBB60_group;f__;g__;s__
OTU_1345	0	0	0	0	0	0	0	0	0	0	0	0	3.81694e-05	0	0	0	0	0	0	0	k__Bacteria;p__unidentified_Bacteria;c__Babeliae;o__Babeliales;f__UBA12411;g__;s__
OTU_1346	0	0	0	0	0	0.000114508	0	0	0	0	0	0	0.00064888	0	0	0	0	0	0	0	k__Bacteria;p__Acidobacteriota;c__Subgroup_22;o__;f__;g__;s__
OTU_1347	0	0	0	0	0	0	0	0	0	7.63388e-05	3.81694e-05	0	0	0	0	0	0	0	0	0	k__Bacteria;p__Myxococcota;c__Polyangia;o__Polyangiales;f__Phaselicystidaceae;g__Phaselicystis;s__
OTU_1348	0	0	0	0	0	0	0	0	0	0	0	0	0	0	0	0	0	0	0	0	k__Bacteria
OTU_1349	0	0	0	0	0	0	0	0	0	0	0	0	0	0	0	0	0	0	0	0	Unknown
OTU_1350	0	0	0	0	0	7.63388e-05	0	0	0	0	0	0	0	0	0	0	0	0	0	0	k__Bacteria;p__Proteobacteria;c__Gammaproteobacteria;o__Burkholderiales;f__Nitrosomonadaceae;g__Nitrosomonas
OTU_1351	0	0	0	0	3.81694e-05	0	0	0	0	0	0	3.81694e-05	0	0	0	0	0	0.000114508	0	0.000114508	k__Bacteria;p__Bacteroidota;c__Bacteroidia;o__Bacteroidales;f__Prevotellaceae;g__Prevotellaceae_UCG-003;s__
OTU_1352	0	0	0	0	0	0	0	0	0	0	0	0	0	0	0	0	0	0	0	0	k__Bacteria;p__Acidobacteriota;c__Thermoanaerobaculia;o__Thermoanaerobaculales;f__Thermoanaerobaculaceae;g__Subgroup_10;s__
OTU_1353	0	0	0	0	0	0	0	0	0	0	0	0	0	0	0	0	0	0	0	0	k__Bacteria;p__Actinobacteriota;c__Actinobacteria;o__Corynebacteriales;f__Dietziaceae;g__Dietzia
OTU_1354	0	0	0	0	0	0	0	0	0	0	0	0	7.63388e-05	0	0	0	0	0	0	0	k__Bacteria
OTU_1355	0	0	0	0	0	0	0	0	0	0	0	0	0	0	0	0	0	0	0	0	k__Bacteria;p__Firmicutes;c__Clostridia;o__Clostridia_UCG-014;f__unidentified_Clostridia_UCG-014;g__unidentified_Clostridia_UCG-014;s__Clostridiales_bacterium_canine_oral_taxon_100
OTU_1356	0	0	0	0	0	0	0	0	0	0	0	0	0	0	0	0	0	0	0	0	k__Bacteria;p__Firmicutes;c__Clostridia;o__Oscillospirales;f__UCG-010;g__;s__
OTU_1357	0	0	0	0	0	3.81694e-05	0	0	0	0	0	0	0	0	0	0	0	0	0	0	k__Bacteria;p__DTB120;c__;o__;f__;g__;s__
OTU_1358	0	0	0	0	0	0	0	0	0	0	0	0	0	0	0	0	0	0	0	0	k__Bacteria;p__Kapabacteria;c__unidentified_Kapabacteria;o__Kapabacteriales;f__;g__;s__
OTU_1359	0	0	0	0	0	0	0	0	0	0	0	0	0.000267186	0	0	0	0	0	0	7.63388e-05	k__Bacteria;p__unidentified_Bacteria;c__Alphaproteobacteria;o__Tistrellales;f__Geminicoccaceae;g__;s__
OTU_1360	0	0	0	0	0	0	0	0	0	0	0	0	0	0	0	0	0	0	0	0	k__Bacteria;p__unidentified_Bacteria;c__Bacilli;o__Lactobacillales;f__Carnobacteriaceae;g__;s__
OTU_1361	0	0	0	0	0	0	0	0	0	0	0	0	0	0	0	0	0	0	0	0	k__Bacteria;p__Firmicutes;c__Clostridia;o__Lachnospirales;f__Lachnospiraceae;g__Oribacterium;s__
OTU_1362	0	0	0	0	0	3.81694e-05	0	3.81694e-05	0	0	0	0	3.81694e-05	0	0	0	0	0	0	0	k__Bacteria;p__unidentified_Bacteria;c__unidentified_Bacteria;o__Gemmatimonadales;f__Gemmatimonadaceae;g__;s__
OTU_1363	0	0	0	0	0	0.000343525	0	0	0	0	0	0	0	0	0	0	0	0	0	0	k__Bacteria;p__Kryptonia;c__unidentified_Kryptonia;o__Kryptoniales;f__BSV26
OTU_1364	0	0	0	0	0	0	0	0	0	0	0	0	0	0	0	0	0	0	0	0	k__Bacteria;p__Actinobacteriota;c__Actinobacteria;o__Propionibacteriales;f__Propionibacteriaceae;g__Propionibacterium;s__Propionibacterium_freudenreichii
OTU_1365	0	0	0	0	0	0	0	0	0	0	0	0	0	0	0	0	0	0	0	0	k__Bacteria;p__Firmicutes;c__Clostridia;o__Oscillospirales;f__Butyricicoccaceae;g__UCG-008;s__
OTU_1366	0	0	0	0	0	0	0	0	0	0	0	0	0	0	0	0	0	0	0	0	k__Bacteria;p__Acidobacteriota;c__Acidobacteriae;o__Subgroup_12;f__;g__;s__
OTU_1367	0	0	0	0	0	0	0	0	0	0	0	0	0.000496202	0	0	0	0	0	0	0	k__Bacteria;p__unidentified_Bacteria;c__Bacteroidia;o__Chitinophagales;f__Saprospiraceae;g__;s__
OTU_1368	7.63388e-05	0	0	0	0	0	0	0.000229016	0.000496202	0.000458033	0.000954235	3.81694e-05	0	0	0	0	0	7.63388e-05	0	0.000114508	k__Bacteria;p__Actinobacteriota;c__Actinobacteria;o__Bifidobacteriales;f__Bifidobacteriaceae;g__Bifidobacterium;s__Bifidobacterium_pseudolongum
OTU_1369	0	0	0	0	0	0	0	0	0	0	0	0	0	0	0	0	0	0	0	0	k__Bacteria;p__Bacteroidota;c__Bacteroidia;o__Chitinophagales;f__Saprospiraceae;g__OLB8;s__
OTU_1370	0	0	0	0	0	0	0	7.63388e-05	0	0	0	0	0	0	0	0	0	0	0	0	k__Bacteria
OTU_1371	0	0	0	0	0	7.63388e-05	0	0	0	3.81694e-05	7.63388e-05	0	0	0	0	0	0	0	0	0	k__Bacteria;p__unidentified_Bacteria;c__unidentified_Bacteria;o__Gemmatimonadales;f__Gemmatimonadaceae;g__;s__
OTU_1372	0	0	0	0	0	0	0	0	0	0	0	0	0	0	0	0	0	0	0	0	k__Bacteria;p__Firmicutes;c__Clostridia;o__Lachnospirales;f__Lachnospiraceae;g__CHKCI001;s__
OTU_1373	0	0	0	0	0	0	0	0	0	0	0	0	0	0	0	0	0	0	0	0	k__Bacteria;p__unidentified_Bacteria;c__Acidobacteriae;o__Acidobacteriales;f__Acidobacteriaceae_(Subgroup_1);g__;s__
OTU_1374	0	0	0	0	0	0	0	0	0	0	0	0	0	0	0	0	0	0	0	0	k__Bacteria;p__Acidobacteriota;c__Acidobacteriae;o__Acidobacteriales;f__Koribacteraceae;g__Candidatus_Koribacter;s__
OTU_1375	0	0	0	0	0	0	0	0	0	3.81694e-05	0	0	0	0	0	0	0	0	0	0	k__Bacteria;p__unidentified_Bacteria;c__unidentified_Bacteria;o__Gemmatimonadales;f__Gemmatimonadaceae;g__;s__
OTU_1376	0	0	0	0	0	0	0	0	0	0	0	0	0	0	0	0	0	0	0	0	k__Bacteria;p__Firmicutes;c__Clostridia;o__Peptostreptococcales-Tissierellales;f__Sedimentibacteraceae;g__Sedimentibacter;s__Sedimentibacter_hongkongensis
OTU_1377	0	0	0	0	0	0	0	0	0	0	0	0	0	0	0	0	3.81694e-05	0	0	0	k__Bacteria;p__Firmicutes;c__Clostridia;o__unidentified_Clostridia;f__Ruminococcaceae;g__unidentified_Ruminococcaceae;s__[Clostridium]_leptum
OTU_1378	7.63388e-05	0.000190847	0	0	0	0	7.63388e-05	0	0	0	0	0	0	3.81694e-05	0	0	0	0	0	0	k__Bacteria;p__unidentified_Bacteria;c__Alphaproteobacteria;o__Rhodospirillales;f__;g__;s__
OTU_1379	0	0	0	0	0	0	0	0	0	0	0	0	0	0	0	0	0	0	0	7.63388e-05	k__Bacteria;p__unidentified_Bacteria;c__Vicinamibacteria;o__Vicinamibacterales
OTU_1380	0	0	0	0.000419863	0	0	0	0	0	0	0	0	0	0	0	0	0	0	0	0	k__Bacteria;p__unidentified_Bacteria;c__Bacilli;o__Mycoplasmatales;f__Mycoplasmataceae;g__;s__
OTU_1381	0	0	0	0	0	0	0	0	0	0	0	0	0	0	0	0	0	0	0	0	Unknown
OTU_1382	0	0	0	0	0	0	0	0	0	0	0	0	0	0	0	0	0	0	0	0	k__Bacteria;p__Firmicutes;c__Clostridia;o__Oscillospirales;f__[Eubacterium]_coprostanoligenes_group;g__;s__
OTU_1383	0	0	0	0	0	0	0	0	0	0	0	0	0	0	0	0	0	0	0	0	k__Bacteria;p__Firmicutes;c__Clostridia;o__Christensenellales;f__Christensenellaceae;g__Christensenella
OTU_1384	0	0	0	0.000114508	0	0	3.81694e-05	0	0	0	0	0	0	0	3.81694e-05	0	0	0	7.63388e-05	0	k__Bacteria;p__Firmicutes;c__Clostridia;o__Clostridia_UCG-014;f__;g__;s__
OTU_1385	0	0	0	0	0	0	0	0	0	0	0	0	0	0	0	0	0	7.63388e-05	0	0	k__Bacteria;p__Spirochaetota;c__Spirochaetia;o__Spirochaetales;f__Spirochaetaceae;g__Treponema
OTU_1386	0	0	0	0	0	0	0	0	0	0	0	0	0	0	0	0	0	0	0	0	k__Bacteria;p__Bacteroidota;c__Bacteroidia;o__Sphingobacteriales;f__Lentimicrobiaceae;g__Lentimicrobium
OTU_1387	0	0	0	0	0	0	0	0	0	0	0	0	0	0	0	0	0	0	0	0	k__Bacteria;p__Campilobacterota;c__Campylobacteria;o__Campylobacterales;f__Arcobacteraceae;g__Arcobacter;s__
OTU_1388	0	0	0	0	0	0	0	0	0	0	0	0	0	0	0	0	0	0	0	0	k__Bacteria;p__Bacteroidota;c__Bacteroidia;o__Sphingobacteriales;f__Sphingobacteriaceae;g__Pedobacter;s__
OTU_1389	0	0	0	0	0	0	0	0	0	0	0	0	0	0	0	0	0	0	0	0	k__Bacteria;p__Firmicutes;c__Clostridia;o__Oscillospirales;f__UCG-010;g__;s__
OTU_1390	0	0	0	0	0	0	0	0	0	0	0	0	0	0	0	0	0	0	0	0	k__Bacteria;p__Proteobacteria;c__Gammaproteobacteria;o__Burkholderiales;f__Rhodocyclaceae;g__Thauera;s__
OTU_1391	0	0	0	0	0	0	0	0	0	0	0	0	0	0	0	0	0	3.81694e-05	0	0.000114508	k__Bacteria;p__Actinobacteriota;c__Actinobacteria;o__Corynebacteriales;f__Nocardiaceae;g__Rhodococcus;s__Rhodococcus_erythropolis
OTU_1392	3.81694e-05	0	0	0	0	0	0	0	0	0	0	0	0	0	0	0	0	0	0	0	k__Bacteria;p__Proteobacteria;c__Alphaproteobacteria;o__Rhodobacterales;f__Rhodobacteraceae;g__Paracoccus;s__Paracoccus_yeei
OTU_1393	0	0	0	0	0	0	0	0	0.000419863	0	0	0	0	0	0	0	0	0	0	0	k__Bacteria;p__Firmicutes;c__Clostridia;o__unidentified_Clostridia;f__Ruminococcaceae;g__unidentified_Ruminococcaceae;s__Clostridium_jeddahense
OTU_1394	0	0	0	0	0	0	0	0	0	0	0	3.81694e-05	0	0	0	0	0	0	0	0	k__Bacteria;p__Bacteroidota;c__Bacteroidia;o__Bacteroidales;f__Bacteroidaceae;g__Bacteroides;s__Bacteroides_sp_Marseille-P3166
OTU_1395	0	0	0	0	0	0	0	0	0	0	0	0	0.000534372	0	0	0	0	0	0	0	k__Bacteria
OTU_1396	0	0	0	0	0	0	0	0	0	0	0	0	0	0	0	0	0	0	0	0	k__Bacteria;p__Latescibacterota;c__;o__;f__;g__;s__
OTU_1397	0	0	0	0	0	0	0	0	3.81694e-05	3.81694e-05	3.81694e-05	0	0	0	0	0	0	0	0	0	k__Bacteria;p__unidentified_Bacteria;c__Alphaproteobacteria;o__;f__;g__;s__
OTU_1398	0	0	0	0	0	0	0	0	0	0	0	0	0	0	0	0	0	0	0	0	k__Bacteria;p__Candidatus_Levybacteria;c__Microgenomatia;o__;f__;g__;s__
OTU_1399	0	0	0	0	0	7.63388e-05	0	0	0	0	0	0	0.000343525	0	0	0	0	0	0	0	k__Bacteria;p__Proteobacteria;c__Gammaproteobacteria;o__Burkholderiales;f__Nitrosomonadaceae;g__MND1;s__
OTU_1400	0	0	0	0	0	0	0	0	0	0	0	0	0	0	0	0	0	0	0	0	k__Bacteria;p__Gemmatimonadetes;c__unidentified_Gemmatimonadetes;o__Gemmatimonadales;f__Gemmatimonadaceae;g__Gemmatimonas
OTU_1401	0	0	0	0	0	0	0	0	0	3.81694e-05	0	0	0	0	0	0	0	0	0	0	k__Archaea;p__Crenarchaeota;c__Nitrososphaeria;o__Nitrososphaerales;f__Nitrososphaeraceae;g__;s__
OTU_1402	0	0	0	0	0	0	0	0	0	0	0	0	0	0	0	0	0	0	0	0	k__Bacteria;p__unidentified_Bacteria;c__Vicinamibacteria;o__Vicinamibacterales;f__;g__;s__
OTU_1403	0	0	0	0	0	0	0	0	0	0	0	0.000114508	0	0	0	0	0	0	0	3.81694e-05	k__Bacteria;p__Proteobacteria;c__Alphaproteobacteria;o__Rhizobiales;f__Xanthobacteraceae;g__Pseudolabrys;s__
OTU_1404	7.63388e-05	0.000190847	3.81694e-05	0.000267186	0.000114508	0	0.000114508	3.81694e-05	0	0	0	0.000190847	0	3.81694e-05	0	0	0.000190847	0.000229016	0.000152678	0	k__Bacteria;p__Firmicutes;c__Clostridia;o__Lachnospirales;f__Lachnospiraceae
OTU_1405	0	0	0	0	0	0	0	0	0	3.81694e-05	3.81694e-05	0	0	0	0	0	0	0	0	0	k__Bacteria;p__Proteobacteria;c__Gammaproteobacteria;o__Xanthomonadales;f__Xanthomonadaceae;g__Arenimonas;s__
OTU_1406	0	0	0	0	0	0	0	0	0	0	3.81694e-05	0	0	0	0	0	0	0	0	0	k__Bacteria;p__Proteobacteria;c__Gammaproteobacteria;o__Diplorickettsiales;f__Diplorickettsiaceae;g__Aquicella;s__
OTU_1407	0	0	0	0	0	0	0	0	0	0	0	0	0	0	0	0	0	0	0	0	k__Bacteria;p__unidentified_Bacteria;c__Negativicutes;o__Veillonellales-Selenomonadales;f__Selenomonadaceae;g__unidentified_Selenomonadaceae
OTU_1408	0	0	0	0	0	0	0	0	0	0	0	0	0	0	0	0	0	0	0	0	k__Bacteria
OTU_1409	0	0	0	0	0	0	0	0	0	0	0	0	0	0	0	0	0	0	0	0	k__Bacteria
OTU_1410	0	0	0	0	0	0	0	0	0.000152678	0	7.63388e-05	0	0.00064888	0	0	0	0	0	0	0	k__Bacteria;p__unidentified_Bacteria;c__Myxococcia;o__Myxococcales;f__Myxococcaceae;g__;s__
OTU_1411	0	0	0	0	0	0	0	0	0	0	0	0	0	0	0	0	0	0	0	0	k__Bacteria;p__Firmicutes;c__Clostridia;o__Oscillospirales;f__UCG-010;g__;s__
OTU_1412	0	0	0	0	0	0	0	0	0	0	0	0	0	0	0	0	0	0	0	0	k__Bacteria;p__Verrucomicrobiota;c__Verrucomicrobiae;o__Pedosphaerales;f__Pedosphaeraceae;g__;s__
OTU_1413	0	0	0	0	0	0	0	0	0	0	0	0	0	0	0	0	0	0	0	0	k__Bacteria;p__Entotheonellaeota;c__Entotheonellia;o__Entotheonellales;f__Entotheonellaceae;g__;s__
OTU_1414	0	0	0	0	3.81694e-05	0	0	0	0	0	0	0	0	0	0	0	0	0	0	0	k__Bacteria;p__Actinobacteriota;c__Acidimicrobiia;o__Microtrichales;f__Ilumatobacteraceae;g__CL500-29_marine_group;s__
OTU_1415	0	0	0	0	0	0	0	0	0	0	0	0	0	0	0	0	0	0	0	7.63388e-05	k__Bacteria;p__Firmicutes;c__Bacilli;o__Erysipelotrichales;f__Erysipelotrichaceae;g__[Anaerorhabdus]_furcosa_group;s__
OTU_1416	0	0	0	0	0	0	0	0	0	0	0	0	0	0	0	0	0	0	0	0	k__Bacteria;p__unidentified_Bacteria;c__Rhodothermia;o__Rhodothermales;f__Rhodothermaceae;g__;s__
OTU_1417	0	0	0	0	0	3.81694e-05	0	0	0	7.63388e-05	0	0	0	0	0	0	7.63388e-05	0	0	0	k__Bacteria
OTU_1418	7.63388e-05	0	0	0.000152678	0	3.81694e-05	0	0	0	0	0	0	0	0	0	0	0	0	3.81694e-05	0	k__Bacteria;p__unidentified_Bacteria;c__Clostridia;o__Lachnospirales;f__Lachnospiraceae;g__;s__
OTU_1419	0	0	0	0	0	0	0	0	0	0	0	0	0	0	0	0	0	0	0	0	k__Bacteria;p__Proteobacteria;c__Gammaproteobacteria;o__Burkholderiales;f__Neisseriaceae;g__Kingella;s__
OTU_1420	0	0	0	0	0	0	0	0	0	0	0	0	7.63388e-05	0	0	0	0	0	0	0	k__Bacteria;p__Methylomirabilota;c__Methylomirabilia;o__Rokubacteriales;f__;g__;s__
OTU_1421	0	0	0	0	0	7.63388e-05	0	0	0	0	0	0	0	7.63388e-05	0	0	0	0	0	0	k__Bacteria;p__Firmicutes;c__Clostridia;o__Lachnospirales;f__Lachnospiraceae;g__A2;s__
OTU_1422	0	0	0	0	0	0	0	0	0	0	0	0	0	0	0	0	0	0	0	0	k__Bacteria;p__MBNT15;c__;o__;f__;g__;s__
OTU_1423	7.63388e-05	0.000343525	3.81694e-05	0	7.63388e-05	0.000114508	7.63388e-05	0	0	3.81694e-05	0	0	0	7.63388e-05	0	7.63388e-05	3.81694e-05	0	0	0	k__Bacteria;p__Bacteroidota;c__Bacteroidia;o__Bacteroidales;f__Muribaculaceae;g__;s__
OTU_1424	0	0	0	0	0	0	0	0	0	0	0	0	0	0	0	0	0	0	0	0	k__Bacteria;p__unidentified_Bacteria;c__Acidobacteriae;o__Acidobacteriales;f__;g__;s__
OTU_1425	0	0	0	0	0	0	0	0	0	0	0	0	0	0	0	0	0	0	0	0	k__Bacteria;p__Firmicutes;c__Bacilli;o__Erysipelotrichales;f__Erysipelotrichaceae;g__Faecalitalea
OTU_1426	0	0	0	0	0	0	0	0	0	0	0	0	0	0	0	0	0	0	0	0	k__Bacteria;p__Actinobacteriota;c__Actinobacteria;o__Corynebacteriales;f__Corynebacteriaceae;g__Corynebacterium;s__Corynebacterium_variabile
OTU_1427	0	0	0	0	0	0	0	0	0	0	0	0	0	0	0	0	0	0	0	3.81694e-05	k__Bacteria;p__unidentified_Bacteria;c__Acidimicrobiia;o__Actinomarinales;f__;g__;s__
OTU_1428	0	0	0	0	0	0	0	0	0	0	0	0	0	0	0	0	0	0	0	0	k__Bacteria;p__Candidatus_Jorgensenbacteria;c__unidentified_Candidatus_Jorgensenbacteria;o__unidentified_Candidatus_Jorgensenbacteria;f__unidentified_Candidatus_Jorgensenbacteria;g__unidentified_Candidatus_Jorgensenbacteria;s__Candidatus_Adlerbacteria_bacterium_GW2011_GWC1_50_9
OTU_1429	0	0	0	0	0	0	0	7.63388e-05	0	0	0	0	0	0	0	0	0	0	0	0	k__Bacteria;p__Acidobacteriota;c__Subgroup_20;o__;f__;g__;s__
OTU_1430	0	0	0	0	0	0	0	0	0	0	0	0	0	0	0	0	0	0	0	0	k__Bacteria;p__Actinobacteriota;c__Actinobacteria;o__Frankiales;f__Frankiaceae;g__Jatrophihabitans;s__
OTU_1431	0	0	0	0	0	0	0	0	0	0	0	0	0	0	0	0	3.81694e-05	0	0	0	k__Bacteria;p__Firmicutes;c__Clostridia;o__Lachnospirales;f__Lachnospiraceae;g__Coprococcus;s__
OTU_1432	0	0	0	0	0	0	0	0	0	3.81694e-05	7.63388e-05	0	0	0	0	0	0	0	0	0	k__Bacteria;p__Firmicutes;c__Bacilli;o__Bacillales;f__Bacillaceae;g__Bacillus;s__[Bacillus]_thermocloacae
OTU_1433	0.000725219	7.63388e-05	0.000916065	0.00259552	0.00061071	0.000229016	0.000190847	3.81694e-05	0	0	0	0	0.000114508	0	0	0	0.000152678	0	0.000152678	0.000190847	k__Bacteria;p__Firmicutes;c__Clostridia;o__Clostridia_UCG-014;f__;g__;s__
OTU_1434	0	0	0	0	0	0	0	0	0	0	0	0	0	0	0	0	0	0	0	0	k__Bacteria;p__Gemmatimonadetes;c__unidentified_Gemmatimonadetes;o__Gemmatimonadales;f__Gemmatimonadaceae
OTU_1435	0	0	0	0	0	0	0	0	0	0	0	0	0	0	0	0	0	0	0	0	k__Bacteria;p__Proteobacteria;c__Alphaproteobacteria;o__Paracaedibacterales;f__Paracaedibacteraceae;g__Candidatus_Paracaedibacter;s__
OTU_1436	0	0	0	0	0	3.81694e-05	0	0	0	0	0	0	0	0	0	0	0	0	0	0	k__Bacteria;p__Proteobacteria;c__Alphaproteobacteria;o__Rhizobiales;f__Rhizobiaceae;g__Aureimonas;s__
OTU_1437	0	0	0	0	0	0	0	0	0	0	0	0	0	0	0	0	0	0	0	7.63388e-05	k__Bacteria;p__Myxococcota;c__Polyangia;o__Polyangiales;f__BIrii41;g__;s__
OTU_1438	0	0	0	0	0	0	0	0	3.81694e-05	0	0	0	0	0	0	0	0	0	0	0	k__Bacteria;p__Kapabacteria;c__unidentified_Kapabacteria;o__Kapabacteriales;f__;g__;s__
OTU_1439	0	0	0	0	0	0	0	0	0	0	0	0	0	0	0	0	0	0	0	0	k__Bacteria
OTU_1440	0	0	0	0	0	0	0	0	0	0	0	0	0	3.81694e-05	0	7.63388e-05	0	0	0	0	k__Bacteria;p__unidentified_Bacteria;c__Alphaproteobacteria;o__Rhodospirillales;f__;g__;s__
OTU_1441	7.63388e-05	3.81694e-05	0	0	0	0	0	0	0	0	0	0	0.000152678	3.81694e-05	0	0	0	0	0	0	k__Bacteria;p__Firmicutes;c__Clostridia;o__Oscillospirales;f__Oscillospiraceae;g__Colidextribacter;s__
OTU_1442	0	0	0	0	0	0	0	0	0	0	0	0	0	0	0	0	0	0	0	0	k__Bacteria;p__Firmicutes;c__Clostridia;o__Caldicoprobacterales;f__Caldicoprobacteraceae;g__Caldicoprobacter;s__
OTU_1443	0	0	0	0	0	0.000152678	0	7.63388e-05	0	3.81694e-05	0	0	0	0	0	0	0	0	0	0	k__Bacteria;p__Actinobacteriota;c__Actinobacteria;o__Propionibacteriales;f__Nocardioidaceae;g__Aeromicrobium;s__
OTU_1444	0.000152678	0	7.63388e-05	0	0	0.000381694	0.000877896	0	0	0	0	7.63388e-05	0.000267186	0.000229016	0.000267186	3.81694e-05	0.000305355	0	0	0.000229016	k__Bacteria;p__Firmicutes;c__Clostridia;o__Oscillospirales;f__Ruminococcaceae;g__UBA1819;s__
OTU_1445	0	0	0	0	7.63388e-05	0	0	0	0	0	0	7.63388e-05	0	0	0	0	0	0	0	0	k__Bacteria;p__Firmicutes;c__Clostridia
OTU_1446	0	0	0	0	0	0	0	0	0	0	0	0	0	0	0	0	0	0	0	0	k__Bacteria;p__Actinobacteriota;c__Actinobacteria;o__Propionibacteriales;f__Nocardioidaceae;g__Nocardioides;s__
OTU_1447	0	0	0	0	0	0	0	0	0	0	0	0	0	0	0	0	0	0	0	7.63388e-05	k__Bacteria;p__unidentified_Bacteria;c__Polyangia;o__Polyangiales;f__Sandaracinaceae;g__;s__
OTU_1448	0	0	0	0	0	0	0	0	0	0	3.81694e-05	0	0	0	0	0	0	0	0	0	k__Bacteria;p__Chloroflexi;c__JG30-KF-CM66;o__;f__;g__;s__
OTU_1449	0	0	0	0	0	0	0	0	0	0	0	0	0	0	0	0	0	0	0	0	k__Bacteria
OTU_1450	0	0	0	0	0	0	0	0	0	0	0	0	7.63388e-05	0	0	0	0	0	0	0	k__Bacteria;p__Bacteroidota;c__Ignavibacteria;o__Ignavibacteriales;f__Ignavibacteriaceae;g__Ignavibacterium
OTU_1451	0	0	0	0	0	0	0	0	0	0	0	0	0	0	0	0	0	0.000305355	0	0	k__Bacteria;p__Chloroflexi;c__Dehalococcoidia;o__MSBL5;f__;g__;s__
OTU_1452	0	0	0	0	0	0	0	0	0	0	0	0	0	0	0	0	0	0	0	0	k__Bacteria;p__unidentified_Bacteria;c__Clostridia;o__Oscillospirales;f__Ruminococcaceae;g__;s__
OTU_1453	0	0	0	0	0	0	0	0	0	0	0	0	0	0	0	0	0	0	0	0	k__Bacteria;p__Chloroflexi;c__Anaerolineae;o__SBR1031;f__A4b;g__;s__
OTU_1454	0	0	0	0	0	0	0	0	0	0	0	0	0	0	0	0	0	0	0	0	k__Bacteria;p__Proteobacteria;c__Gammaproteobacteria;o__Burkholderiales;f__SC-I-84;g__;s__
OTU_1455	0	0	0	0	0	0	0	3.81694e-05	0.000114508	7.63388e-05	0.000114508	0	0	0	0	0	0	0	0	7.63388e-05	k__Bacteria;p__Chloroflexi;c__P2-11E;o__;f__;g__;s__
OTU_1456	0	0	7.63388e-05	0	0	0.000114508	0	0	0	0	0	0	0	0	0	0	0	0	0	0	Unknown
OTU_1457	0	0	0	0	0	0	0	0	0	0	0	0	0	0	0	0	0	0	0	0	k__Bacteria;p__Firmicutes;c__Clostridia;o__Clostridia_vadinBB60_group;f__;g__;s__
OTU_1458	0	0	0	0	0	0	0	0	0	0	0	0	0	0	0	0	0	0	0	0	k__Bacteria;p__Firmicutes;c__Bacilli;o__Erysipelotrichales;f__Erysipelatoclostridiaceae;g__Coprobacillus
OTU_1459	0	0	0	0	0	0.000229016	0	0	0	0	0	0	0	0	0	0	0	0	0	0	k__Bacteria;p__Sva0485;c__;o__;f__;g__;s__
OTU_1460	0	0	0	0	0	0	0	0	0	0	0	0	0	0	0	0	0	0	0	0	k__Bacteria;p__unidentified_Bacteria;c__Coriobacteriia;o__Coriobacteriales;f__Atopobiaceae;g__;s__
OTU_1461	0	0	0	0	0	0	0	0	0	0	0	0	0	0	0	0	0	0	0	0	k__Bacteria;p__unidentified_Bacteria;c__Vicinamibacteria;o__Vicinamibacterales;f__;g__;s__
OTU_1462	0	0	0	0	0	0	0	0	0	0	0	0	0.000267186	0	0	0	0	0	0	0	k__Bacteria;p__Acidobacteriota;c__Subgroup_22;o__;f__;g__;s__
OTU_1463	0	0	0	0	0	0	0	7.63388e-05	3.81694e-05	7.63388e-05	0	0	0	0	0	0	0	0	0	0	k__Bacteria;p__unidentified_Bacteria;c__Gammaproteobacteria;o__Salinisphaerales;f__Solimonadaceae;g__;s__
OTU_1464	0	0	0	0	0	0	0	0	0	0	0	0	0	7.63388e-05	0	0	0	0	0	0	k__Bacteria;p__Cyanobacteria;c__Vampirivibrionia;o__Gastranaerophilales;f__;g__;s__
OTU_1465	0	0	0	0	0	0	0	0	3.81694e-05	0	0	0	0	0	0	0	0	0	0	7.63388e-05	k__Bacteria;p__Actinobacteriota;c__Thermoleophilia;o__Solirubrobacterales;f__67-14;g__;s__
OTU_1466	0	0	0	0	0	0	0	0	0	0	0	0	0	0	0	0	0	0	0	0	k__Bacteria;p__Methylomirabilota;c__Methylomirabilia;o__Rokubacteriales;f__;g__;s__
OTU_1467	0	0	0	0	0	0	0	0	0	0	0	0	0	0	0	0	0	0	0	0	k__Bacteria
OTU_1468	0	0	0	0	0	3.81694e-05	0	0	0	0	0	0	0	0	0	0	0	0	0	0	k__Bacteria;p__unidentified_Bacteria;c__unidentified_Bacteria;o__Gemmatimonadales;f__Gemmatimonadaceae;g__;s__
OTU_1469	0	0	0	0	0	0	0	0	0	0	0	0	0	0	0	0	0	0	0	0	k__Bacteria;p__Bacteroidota;c__Bacteroidia;o__Cytophagales;f__Microscillaceae;g__OLB12;s__
OTU_1470	0	0	0	0	0	0	0	0	0	0	0	0	0	0	0	0	0	0	0	0	k__Bacteria;p__unidentified_Bacteria;c__Bacteroidia;o__Cytophagales;f__Microscillaceae;g__;s__
OTU_1471	0	0	0	0	0	0	0	7.63388e-05	3.81694e-05	0	7.63388e-05	0	0	0	0	0	0	0	0	0	k__Bacteria;p__Proteobacteria;c__Gammaproteobacteria;o__Diplorickettsiales;f__Diplorickettsiaceae;g__Aquicella;s__
OTU_1472	0	0	0	0	0	0	0	0	0	0	0	0	0	0	0	0	0	0	0	0	k__Bacteria;p__unidentified_Bacteria;c__Alphaproteobacteria;o__Elsterales;f__;g__;s__
OTU_1473	0	0	0	0	0	0	0	0	0	0	3.81694e-05	0	0	0	0	0	0	0	0	0	k__Bacteria;p__Chloroflexi;c__Anaerolineae;o__Anaerolineales;f__Anaerolineaceae;g__UTCFX1;s__
OTU_1474	0	0	0	0	0	3.81694e-05	0	0	0	0	0	0	0.000190847	0	0	0	0	0	0	0	k__Bacteria;p__unidentified_Bacteria;c__Bacteroidia;o__Cytophagales;f__Microscillaceae;g__;s__
OTU_1475	0.000381694	0.000229016	3.81694e-05	0	0.000114508	0.000114508	7.63388e-05	0	0	0	0	0	0.000114508	0	0.000305355	3.81694e-05	0	3.81694e-05	0	3.81694e-05	k__Bacteria
OTU_1476	0	0	0	0	0	0	0	0	0	0	0	0	0	0	0	0	0	0	0	0	k__Bacteria
OTU_1477	0	0	0	0	0	0	0	0	0	0	0	0	0	0	0	0	0	0	0	0	k__Bacteria;p__Firmicutes;c__Clostridia;o__Peptostreptococcales-Tissierellales;f__unidentified_Peptostreptococcales-Tissierellales;g__Guggenheimella;s__
OTU_1478	0	0	0	0	0	0	0	0.000114508	0	0.000114508	0.000190847	0	0	0	0	0	0	0	0	0	k__Bacteria;p__Firmicutes;c__Bacilli;o__Bacillales;f__Bacillaceae;g__Sinibacillus;s__
OTU_1479	0	0	0	0	0	0	0	0	0	0	0	7.63388e-05	0	0	0.000114508	0	0	0	0	0	k__Bacteria;p__Firmicutes;c__Clostridia;o__Oscillospirales;f__UCG-010;g__;s__
OTU_1480	0	0	0	0	0	0	0	0	0	0	0	0	0	7.63388e-05	0.000114508	3.81694e-05	0	0	0	0	k__Bacteria;p__Bacteroidota;c__Bacteroidia;o__Bacteroidales;f__Muribaculaceae;g__;s__
OTU_1481	0	0	0	0	0	0	0	0.000114508	3.81694e-05	7.63388e-05	0.000114508	0	3.81694e-05	0	0	0	0	0	0	0	k__Bacteria;p__Nitrospirota;c__Nitrospira;o__Nitrospirales;f__Nitrospiraceae;g__;s__
OTU_1482	0	0	0	0	0	0	0	0	0	0	0	0	0	0	0	0	0	0	0	0	k__Bacteria;p__Bacteroidota;c__Bacteroidia;o__Chitinophagales;f__Chitinophagaceae;g__Taibaiella;s__
OTU_1483	0	0	0	0	0	0	0	0	0	0	0	0	0	0	0	0	0	0	0	0	k__Bacteria;p__Firmicutes;c__Negativicutes;o__Veillonellales-Selenomonadales;f__Veillonellaceae;g__Veillonella;s__Veillonella_sp_oral_taxon_780
OTU_1484	0	0	0	0	0	0	0	0	0	0	0	0	0	0	0	0	0	0	0	0	k__Bacteria;p__Chloroflexi;c__OLB14;o__;f__;g__;s__
OTU_1485	0	0	0	0	0	0	0	0	0	0	0	0	0	0	0	0	0	0	0	0	k__Bacteria;p__Chloroflexi;c__KD4-96;o__;f__;g__;s__
OTU_1486	0	0	0	0	0	0	0	0	0	0	0	0	0	7.63388e-05	0	0	0	0	0	0	k__Bacteria;p__Firmicutes;c__Clostridia;o__Clostridia_vadinBB60_group;f__;g__;s__
OTU_1487	0	0	0	0	0	0.000152678	0	3.81694e-05	3.81694e-05	3.81694e-05	3.81694e-05	3.81694e-05	0.000305355	0	0	0	0	0	0	0	k__Bacteria;p__Myxococcota;c__Polyangia;o__Haliangiales;f__Haliangiaceae;g__Haliangium;s__
OTU_1488	0	0	0	0	0	0	0	0	0	0	0	0	0	0	0	0	0	0	0	0	k__Bacteria;p__Firmicutes;c__Bacilli;o__Staphylococcales;f__Staphylococcaceae;g__Macrococcus;s__Macrococcus_caseolyticus
OTU_1489	0	0	0	0	0	0	0	0	0	0	0	0	0	0	0	0	0	0	0	0	k__Bacteria;p__Chloroflexi;c__Chloroflexia;o__Thermomicrobiales;f__JG30-KF-CM45;g__;s__
OTU_1490	0	0	0	7.63388e-05	0	0	0	0	0	0	0	0	0	0	0	0	0	0	0	3.81694e-05	k__Bacteria;p__Firmicutes;c__Clostridia;o__Oscillospirales;f__Ruminococcaceae;g__Ruminococcus;s__Ruminococcus_flavefaciens
OTU_1491	0	7.63388e-05	0	0	0	0	0	0	0	0	0	0	0	0	7.63388e-05	0	3.81694e-05	0	0	0	k__Bacteria;p__Firmicutes;c__Clostridia;o__Lachnospirales;f__Lachnospiraceae
OTU_1492	0	0	0	0	0	0	0	0	0	3.81694e-05	0	0	0	0	0	0	0	0	0	0	k__Bacteria;p__Acidobacteriota;c__Holophagae;o__Subgroup_7;f__;g__;s__
OTU_1493	0	0	0	0	0	3.81694e-05	0	0	0	0	0	7.63388e-05	0.00125959	0	0	0	0	0	0	0	k__Bacteria;p__unidentified_Bacteria;c__Gammaproteobacteria;o__Burkholderiales;f__Sutterellaceae;g__;s__
OTU_1494	0	0	0	7.63388e-05	7.63388e-05	0	0	0	0	0	0	0	0	0	0	0	0	0	0	0	k__Bacteria;p__Bacteroidota;c__Bacteroidia;o__Bacteroidales;f__Rikenellaceae;g__Rikenellaceae_RC9_gut_group;s__
OTU_1495	0	0	0	0	0	3.81694e-05	0	0	0	0	0	0	0	0	0	0	0	0	0	0	k__Bacteria;p__Zixibacteria
OTU_1496	0	0	0	0	0	0	0	0	0	0	0	0	0	0	0	0	0	0	0	7.63388e-05	k__Bacteria;p__Proteobacteria;c__Alphaproteobacteria;o__Rhodobacterales;f__Rhodobacteraceae
OTU_1497	0	0	0	0	0	0	0	0	0	0	0	0	0	0	0	0	0	0	0	0	k__Bacteria;p__unidentified_Bacteria;c__Anaerolineae;o__Anaerolineales;f__Anaerolineaceae
OTU_1498	0	0	0	0	0	0	0	0	0	0	0	0	0	0	0	0	0	0	0	0	k__Bacteria;p__Bacteroidota;c__Bacteroidia;o__Sphingobacteriales;f__env.OPS_17;g__;s__
OTU_1499	0	0	0	0	0	0	0	0	0	0	0	0	0	0	0	0	0	0	0	0	k__Bacteria;p__Firmicutes;c__Clostridia;o__Oscillospirales;f__UCG-010;g__;s__
OTU_1500	0	0	0	0	0	0	0	0	0	0	0	0	0.000152678	0	0	0	0	0	0	0	k__Bacteria;p__unidentified_Bacteria;c__unidentified_Bacteria;o__Gemmatimonadales;f__Gemmatimonadaceae;g__;s__
OTU_1501	0	0	0	0	0	0	0	0	0	0	0	0	0	0	0	0	0	0	0	0	k__Bacteria;p__Proteobacteria;c__Gammaproteobacteria;o__Burkholderiales;f__Oxalobacteraceae;g__Massilia
OTU_1502	0	0	0	0	0	0	0	0	0	3.81694e-05	0.000114508	0	0	0	0	0	0	0	0	0	k__Bacteria
OTU_1503	0	0	0	0	0	0	0	0	0	0	0	0	0	0	0	0	0	0	0	0	k__Bacteria;p__Firmicutes;c__Clostridia;o__Clostridiales;f__Clostridiaceae;g__Proteiniclasticum;s__
OTU_1504	0	0	0	0	0	0	0	0	0	0	0	0	0	0	0	0	0	0	0	0	k__Bacteria
OTU_1505	0	0	0	0	0	0	0	0	0	0	0	0	0	0	0	0	0	0	0	0	k__Bacteria;p__Verrucomicrobiota;c__Verrucomicrobiae;o__Pedosphaerales;f__Pedosphaeraceae;g__Ellin517;s__
OTU_1506	0	0	0	0	0	0	0	0	0	0	0	0	0	0	0	0	0	0	0	0	k__Bacteria;p__unidentified_Bacteria;c__Alphaproteobacteria;o__Elsterales;f__;g__;s__
OTU_1507	0	0	0	0	0	0	0	0	0	3.81694e-05	0	0	0	0	0	0	0	0	0	0	k__Bacteria;p__Actinobacteriota;c__Thermoleophilia;o__Solirubrobacterales;f__67-14;g__;s__
OTU_1508	0	0	0	0	0	0	0	0	0	0	0	0	0	0	0	0	0	0	0	0	k__Bacteria;p__Firmicutes;c__Clostridia;o__Clostridia_UCG-014;f__;g__;s__
OTU_1509	0	0	0	0	0	0	0	3.81694e-05	0	0	7.63388e-05	0	0	0	0	0	0	0	0	7.63388e-05	k__Bacteria
OTU_1510	0	0	0	0	0	0	0	0	0	0	0	0	0	0	0	0	0	0	0	0	k__Bacteria;p__Chloroflexi;c__Ktedonobacteria;o__C0119;f__;g__;s__
OTU_1511	0	0	0	0	0	0	0	7.63388e-05	0	0	3.81694e-05	0	0	0	0	0	0	0	0	0	k__Bacteria;p__unidentified_Bacteria;c__unidentified_Bacteria;o__Gemmatimonadales;f__Gemmatimonadaceae;g__;s__
OTU_1512	0	0	0	0.000190847	0	0	0	0	0	3.81694e-05	0	0.000725219	0	7.63388e-05	0	0	0	0.000419863	0	0.000152678	k__Bacteria;p__Firmicutes;c__Bacilli;o__Lactobacillales;f__Lactobacillaceae;g__Lactobacillus
OTU_1513	0	0	0	0	0	0	0	0	0	0	0	0	0	0	0	0	0	0	0	0	k__Bacteria;p__Chloroflexi;c__Anaerolineae;o__SBR1031;f__;g__;s__
OTU_1514	0	0	0	0	0	0	0	0	0	0	0	0	0	0	0	0	0	0	0	0	k__Bacteria;p__Gemmatimonadetes;c__unidentified_Gemmatimonadetes;o__Gemmatimonadales;f__Gemmatimonadaceae;g__Roseisolibacter;s__
OTU_1515	0	0	0	0	0	0	0	0	0	0	0	0	0	0	0	0	0	0	0	0	k__Bacteria;p__unidentified_Bacteria;c__Clostridia;o__Oscillospirales;f__;g__;s__
OTU_1516	0	0	0	0	0	0	0	0	0	0	0	3.81694e-05	0	0	0	0	0	0	0	0	k__Bacteria;p__Firmicutes;c__Clostridia;o__Oscillospirales;f__Oscillospiraceae;g__NK4A214_group;s__
OTU_1517	0	0	0	0	7.63388e-05	0	0	0	0	0	0	0.000114508	0	0	0	0	0	0.000190847	0	0	k__Bacteria;p__Campilobacterota;c__Campylobacteria;o__Campylobacterales;f__Campylobacteraceae;g__Campylobacter;s__Campylobacter_sp_NCTC_13003
OTU_1518	0	0	0	0	0	0	0	0	0	0	0	0	0	0	0	0	0	0	0	0	k__Bacteria;p__Firmicutes;c__Clostridia;o__Oscillospirales;f__[Eubacterium]_coprostanoligenes_group;g__;s__
OTU_1519	0	0	0	0	0	0	0	0	0	0	0	0	0	0	0	0	0	0	0	0	k__Bacteria;p__MBNT15;c__;o__;f__;g__;s__
OTU_1520	0	0	0	0	0	0	0	3.81694e-05	0	7.63388e-05	0	7.63388e-05	0	0	0	0	0	0	0	0	k__Bacteria;p__Proteobacteria;c__Gammaproteobacteria;o__Burkholderiales;f__TRA3-20;g__;s__
OTU_1521	0	0	0	0	0	0	0	3.81694e-05	0.000152678	0	0.000114508	0	3.81694e-05	0	0	0	0	0	0	0	k__Bacteria;p__unidentified_Bacteria;c__Vicinamibacteria;o__Vicinamibacterales;f__;g__;s__
OTU_1522	0	0	0	0	0	0	0	0	0	0	0	0	0	0	0	0	0	0	0	0	k__Bacteria;p__unidentified_Bacteria;c__unidentified_Bacteria;o__Gemmatimonadales;f__Gemmatimonadaceae;g__unidentified_Gemmatimonadaceae;s__Gemmatimonadetes_bacterium_WY71
OTU_1523	0	0	0	0	0	0	0	0	0	0	0	0	0	0	0	0	0	0	0	0	k__Bacteria;p__Firmicutes;c__Bacilli;o__RF39;f__unidentified_RF39;g__unidentified_RF39;s__Firmicutes_oral_clone_FM046
OTU_1524	0	0	0	0	0	7.63388e-05	0	0	0	0	0	0	0	0	0	0	0	0	0	0.000152678	k__Bacteria;p__Acidobacteriota;c__Vicinamibacteria;o__Subgroup_17;f__;g__;s__
OTU_1525	0	0	0	0	0	0	0	0	0	0	0	0	0	0	0	0	0	0	0	0	k__Bacteria;p__Acidobacteriota;c__Acidobacteriae;o__Acidobacteriales;f__Acidobacteriaceae_(Subgroup_1)
OTU_1526	0	0	0	0	0	0	0	0	0	0	0	0	0	0	0	0	0	0	0	0	k__Bacteria;p__Firmicutes;c__Clostridia;o__Peptostreptococcales-Tissierellales;f__unidentified_Peptostreptococcales-Tissierellales;g__Tissierella;s__
OTU_1527	0	0	0	0	0	0	0	0	0	0	0	0	0	0	0	0	0	0	0	0	k__Bacteria;p__Deinococcota;c__Deinococci;o__Deinococcales;f__Trueperaceae;g__Truepera;s__
OTU_1528	0	0	0	3.81694e-05	7.63388e-05	0	0	0	0	0	0	0	0	0	0	0	0	0	0	0	k__Bacteria;p__Synergistota;c__Synergistia;o__Synergistales;f__Synergistaceae;g__Cloacibacillus
OTU_1529	0	0	0	0	0	0.000114508	0	0	0	0	0	0	3.81694e-05	0	0	0	0	0	0	0	k__Bacteria;p__Bacteroidota;c__SJA-28;o__;f__;g__;s__
OTU_1530	0	0	0	0	0	0	0	0	0	0	3.81694e-05	0	0	0	0	0	0	0	0	0	k__Bacteria;p__Bdellovibrionota;c__Bdellovibrionia;o__Bdellovibrionales;f__Bdellovibrionaceae;g__;s__
OTU_1531	0	0	0	0	0	0	0	0	0	0	0	0.000419863	0	0	0	0	0	0	0	0	k__Bacteria;p__Acidobacteriota;c__Blastocatellia;o__Blastocatellales;f__Blastocatellaceae;g__Blastocatella;s__
OTU_1532	0.00122142	0.00370243	0.00103057	0.00141227	0.000381694	0.00175579	0.000572541	0	0	0	0	0	0.000725219	0.000763388	0.0013741	0.0154586	0.00255735	0	0.00488568	0.000114508	k__Bacteria;p__Bacteroidota;c__Bacteroidia;o__Bacteroidales;f__Bacteroidaceae;g__Bacteroides;s__Bacteroides_caecimuris
OTU_1533	0	7.63388e-05	0	0	0	0	0	0	0	0	0	0	0	0	3.81694e-05	0	0	0	0	0	k__Bacteria;p__Proteobacteria;c__Gammaproteobacteria;o__Pseudomonadales;f__Moraxellaceae;g__Psychrobacter
OTU_1534	0	0	0	0	0	0.000496202	0	0	0	0	0	0	0	0	0	0	0.000190847	0	0	0	k__Bacteria;p__Firmicutes;c__Clostridia;o__Lachnospirales;f__Lachnospiraceae
OTU_1535	0	0	0	0	0	0	0	0	0	0	0	0	0	0	0	0	0	0	0	0	k__Bacteria;p__Bacteroidota;c__Bacteroidia;o__Sphingobacteriales;f__Sphingobacteriaceae;g__Pedobacter
OTU_1536	0	0	0	0	0	0	0	0	0.000114508	0	3.81694e-05	0	0	0	0	0	0	0	0	0	k__Bacteria;p__Firmicutes;c__Bacilli;o__Bacillales;f__Planococcaceae;g__Sporosarcina
OTU_1537	0	0	0	0.000114508	0.000114508	0	0	0	0	0	0	0	0	0	0	0	0	7.63388e-05	0	0	k__Bacteria;p__Bacteroidota;c__Bacteroidia;o__Bacteroidales;f__Muribaculaceae;g__;s__
OTU_1538	0	0	0	0	0	0	0	0	0	0	0	0	0	0	0	0	0	0	0	0	k__Bacteria
OTU_1539	0	0	0	0	0	0	0	0	0	0	3.81694e-05	3.81694e-05	0	0	0	0	0	0	0	0	k__Bacteria;p__Bacteroidota;c__Bacteroidia;o__Chitinophagales;f__Chitinophagaceae;g__Flavisolibacter;s__
OTU_1540	0	0	0	0	0	0	0	0	0	0	0	0	0	0	0	0	0	0	0	0	k__Bacteria;p__unidentified_Bacteria;c__Desulfitobacteriia;o__Desulfitobacteriales;f__;g__;s__
OTU_1541	0	0	0	0	0	0	0	0	0	0	0	0	0	0	0	0	0	0	0	0	k__Bacteria;p__unidentified_Bacteria;c__Thermodesulfovibrionia;o__;f__;g__;s__
OTU_1542	0	0	0	0	0	0	0	0	0	0	0	0	0	0	0	0	0	0	0	0	k__Bacteria;p__unidentified_Bacteria;c__Chloroflexia;o__Chloroflexales;f__Roseiflexaceae;g__;s__
OTU_1543	0	0	0	0	0	3.81694e-05	0	0	0	0	0	0	0.000267186	0	0	0	0	0	0	0	k__Bacteria;p__unidentified_Bacteria;c__Vicinamibacteria;o__Vicinamibacterales;f__;g__;s__
OTU_1544	0	0	0	0	0	0	0	3.81694e-05	3.81694e-05	0	0	0	0	0	0	0	0	0	0	3.81694e-05	k__Bacteria;p__Actinobacteriota;c__MB-A2-108;o__;f__;g__;s__
OTU_1545	0	0	0	0	0.000114508	0	0	0	0	0	0	0	0	0	0	0	0	0	0	0	k__Bacteria;p__Bacteroidota;c__Bacteroidia;o__Bacteroidales;f__Muribaculaceae;g__;s__
OTU_1546	0	0	0	0	0	0	0	0	0	0	0	0	0	0	0	0	0	0	0	0	k__Bacteria;p__Bacteroidota;c__Bacteroidia;o__Bacteroidales;f__Rikenellaceae;g__Rikenellaceae_RC9_gut_group;s__
OTU_1547	0	0	0	0	0	0.000114508	0	0	0	0	0	0	3.81694e-05	0	0	0	0	0	0	0	k__Bacteria;p__NB1-j;c__;o__;f__;g__;s__
OTU_1548	0	0	0	0	0	0	0	0	0	0	0	0	0	0	0	0	0	0	0	0	k__Bacteria;p__unidentified_Bacteria;c__Bacteroidia;o__Chitinophagales;f__Chitinophagaceae;g__;s__
OTU_1549	0	0	0	0	0	0	0	0	0	0	0	0	0	0	0	0	0	0	0	0	k__Bacteria;p__Proteobacteria;c__Gammaproteobacteria;o__Burkholderiales;f__Hydrogenophilaceae;g__Tepidiphilus;s__
OTU_1550	0	0	0	0	0	0	0	0	0	0	0	0	0	0	0	0	0	0	0	0	k__Bacteria;p__Proteobacteria;c__Gammaproteobacteria;o__Xanthomonadales;f__Xanthomonadaceae;g__Pseudoxanthomonas;s__Pseudoxanthomonas_taiwanensis
OTU_1551	0.000114508	0.000572541	0	0	0	0	3.81694e-05	0	0	0	0	0	0	0.000114508	0	0	0	0	3.81694e-05	0.000114508	k__Bacteria;p__Firmicutes;c__Clostridia;o__Lachnospirales;f__Lachnospiraceae;g__Roseburia;s__
OTU_1552	0	0	0	0	0	0.000267186	0	0	0	0	0	0	0.000687049	0	0	0	0	0	0	0	k__Bacteria;p__Nitrospirota;c__4-29-1;o__;f__;g__;s__
OTU_1553	0	0	0	0	0	0	0	0.000190847	0.000152678	7.63388e-05	0.000152678	0	0	0	0	0	0	0	0	0	k__Bacteria;p__unidentified_Bacteria;c__Bacteroidia;o__Chitinophagales;f__Saprospiraceae;g__;s__
OTU_1554	0	0	0	0	0	0	0	0	0	0	0	0	0	0	0	0	0	0	0	0	k__Bacteria;p__Firmicutes;c__Bacilli;o__RF39
OTU_1555	0	0	0	0	0	0	0	0	0	0	0	0	0	0	0	0	0	0	0	0	k__Bacteria;p__Bacteroidota;c__Bacteroidia;o__Flavobacteriales;f__Flavobacteriaceae;g__Flavobacterium
OTU_1556	0	0	0	0	0	7.63388e-05	0	0	0	0	0	0	0.000381694	0	0	0	0	0	0	0	k__Bacteria;p__unidentified_Bacteria;c__Thermodesulfovibrionia;o__;f__;g__;s__
OTU_1557	0	0	0	0	0	0	0	7.63388e-05	3.81694e-05	0	7.63388e-05	0	0	0	0	0	0	0	0	7.63388e-05	k__Bacteria;p__Actinobacteriota;c__Actinobacteria;o__Pseudonocardiales;f__Pseudonocardiaceae;g__Lechevalieria;s__
OTU_1558	0	0	0	0	0	0	0	0	0	0	0	0	0	0	0	0	0	0	0	0	k__Bacteria
OTU_1559	0	0	0	0	0	0.000114508	0	3.81694e-05	0	0	0	0	0.000267186	0	0	0	0	0	0	0	k__Bacteria;p__Gemmatimonadetes;c__unidentified_Gemmatimonadetes;o__Gemmatimonadales;f__Gemmatimonadaceae
OTU_1560	0	0	0	0	0	0	0	0	0	0	0	0	0	0	0	0	0	0	0	0	k__Bacteria
OTU_1561	0	0	0	0	0	0	0	0	0	0	0	0	0	0	0	0	0	0	0	0	k__Bacteria;p__Proteobacteria;c__Gammaproteobacteria;o__Burkholderiales;f__SC-I-84;g__;s__
OTU_1562	0	0	0	0	0	0	0	0	0	0	0	0	0	0	0	0	0	0	0	0	Unknown
OTU_1563	0	0	0	0	0	0	0	0	0	0	0	0	0	0	0	0	0	0	0	0	k__Bacteria;p__unidentified_Bacteria;c__Anaerolineae;o__Ardenticatenales;f__;g__;s__
OTU_1564	0	0	0	0	7.63388e-05	0	0	0	0	0	3.81694e-05	7.63388e-05	0.000267186	0	0	0	0	0	0	0	k__Bacteria;p__Proteobacteria;c__Gammaproteobacteria;o__Burkholderiales;f__Comamonadaceae
OTU_1565	0	0	0	0	0	0	0	0	0	0	0	0	0.000114508	0	0	0	0	0	0	0	k__Bacteria;p__unidentified_Bacteria;c__Alphaproteobacteria;o__Tistrellales;f__Geminicoccaceae;g__;s__
OTU_1566	0	0	0	0	0	0	0	0	0	0	0	7.63388e-05	0	0	0	0	0	0	0	0	k__Bacteria;p__Bacteroidota;c__Bacteroidia;o__Chitinophagales;f__Chitinophagaceae;g__Parasegetibacter;s__
OTU_1567	0.000114508	0	0	0	0	0	0	0	0	0	0	0	3.81694e-05	0	0	0	0	0	0	0	k__Bacteria;p__Bacteroidota;c__Bacteroidia;o__Bacteroidales;f__Muribaculaceae;g__;s__
OTU_1568	0	0	0	0	0	0	0	0	0	0	0	0	0	0	0	0	0	0	0	0	k__Bacteria
OTU_1569	0	0	0	0	0	0	0	0	0	0	0	0	0	0	0	0	0	0	0	0	k__Bacteria;p__Firmicutes;c__Bacilli;o__Paenibacillales;f__Paenibacillaceae;g__Paenibacillus;s__Paenibacillus_baekrokdamisoli
OTU_1570	0	0	0	0	0	0	0	0	0	0	0	0	0	0	0	0	0	0	0	0	k__Bacteria;p__Acidobacteriota;c__Holophagae;o__Subgroup_7;f__;g__;s__
OTU_1571	0	0	0	0	0	0	0	0	0	0	0	3.81694e-05	0	0	0	0	0	7.63388e-05	0	0	k__Bacteria;p__Firmicutes;c__Clostridia;o__Oscillospirales;f__[Eubacterium]_coprostanoligenes_group;g__;s__
OTU_1572	0	0	0	0	0	0	0	0	0	0	0	0	0	0	0	0	0	0	0	0	k__Bacteria;p__Gemmatimonadetes;c__unidentified_Gemmatimonadetes;o__Gemmatimonadales;f__Gemmatimonadaceae
OTU_1573	0	0	0	0	0	0	0	0	0	0	0	0	0	0	0	0	0	0	0	0	Unknown
OTU_1574	0	0	0	0	0	0	0	0	0	0	0	0	0	0	0	0	0	0	0	7.63388e-05	k__Bacteria;p__unidentified_Bacteria;c__unidentified_Bacteria;o__Euzebyales;f__Euzebyaceae;g__;s__
OTU_1575	0	0	0	0	0	0	0	0	0	0	0	0	0	0	0	0	0	0	0	0	k__Bacteria;p__Firmicutes;c__Clostridia;o__Oscillospirales;f__UCG-010;g__;s__
OTU_1576	0	0	0	0	0	0	0	0	0	0	0	0	0	0	0	0	0	0	0	0	k__Bacteria;p__Myxococcota;c__Polyangia;o__Haliangiales;f__Haliangiaceae;g__Haliangium;s__
OTU_1577	0	0	0	0	0	0	0	0	0	0	0	0	0	0	0	0	0	0	0	0	k__Bacteria;p__Latescibacteria;c__unidentified_Latescibacteria;o__Latescibacterales;f__Latescibacteraceae;g__;s__
OTU_1578	0	0	0	0	0	0	0	0	0	0	0	0	0	0	0	0	0	0	0	7.63388e-05	k__Bacteria;p__Actinobacteriota;c__Actinobacteria;o__Micromonosporales;f__Micromonosporaceae;g__Longispora;s__
OTU_1579	0	0	0	0	0	0	0	0	0	0	0	0	0	0	0	0	0	0	0	0	k__Bacteria;p__Firmicutes;c__Bacilli;o__Bacillales;f__Marinococcaceae;g__unidentified_Marinococcaceae;s__Bacillaceae_bacterium_BM62
OTU_1580	0	0	0	0	0	0.000152678	0	0	0	0	0	0	0	0	0	0	0	0	0	0	k__Bacteria;p__unidentified_Bacteria;c__Syntrophobacteria;o__Syntrophobacterales;f__;g__;s__
OTU_1581	0	0	0	0	0	0	0	0	0	0	0	0	0	0	0	0	0	0	0	0	k__Bacteria;p__Actinobacteriota;c__Thermoleophilia;o__Gaiellales;f__Gaiellaceae;g__Gaiella;s__
OTU_1582	0	0	0	0	0	3.81694e-05	0	0	0	0	0	0	0	0	0	0	0	0	0	0	k__Bacteria;p__Gemmatimonadetes;c__unidentified_Gemmatimonadetes;o__Gemmatimonadales;f__Gemmatimonadaceae;g__;s__
OTU_1583	0	0	0	0	0	0	0	0	0	0	0	0	0	0	0	0	0	0	0	0.000114508	k__Bacteria;p__Firmicutes;c__Clostridia;o__unidentified_Clostridia;f__Ruminococcaceae;g__;s__
OTU_1584	0	0	0	0	0	0	0	0	0	0	0	0	0	0	0	0	0	0	0	0	k__Bacteria
OTU_1585	0	0	0	0	0	0	0	0	0	0	0	0	0	0	0	0	0	0	0	0	k__Bacteria;p__Bacteroidota;c__Bacteroidia;o__Bacteroidales;f__Prevotellaceae;g__Alloprevotella;s__
OTU_1586	0	0	0	0	0	0	0	0	0	0	0	0	0.000419863	0	0	0	0	0	0	0	k__Bacteria;p__unidentified_Bacteria;c__Anaerolineae;o__Anaerolineales;f__Anaerolineaceae;g__;s__
OTU_1587	0	0	0	0	0	0	0	0	0	0	0	3.81694e-05	0	0	0	0	0	0	0	0	k__Bacteria;p__Firmicutes;c__Bacilli;o__RF39;f__;g__;s__
OTU_1588	0.000305355	0.000381694	0	0.000190847	0	0.000190847	0.000114508	0.000152678	0	7.63388e-05	3.81694e-05	0	3.81694e-05	0.000305355	0	0	3.81694e-05	0	0	0	k__Bacteria;p__Firmicutes;c__Clostridia;o__Lachnospirales;f__Lachnospiraceae;g__Lachnospiraceae_UCG-001;s__
OTU_1589	0	0	0	0	0	0	0	0	0	0	0	0	0	0	0	0	0	0	0	0.000190847	k__Bacteria;p__Desulfobacterota;c__Desulfobacteria;o__Desulfobacterales;f__Desulfosarcinaceae
OTU_1590	0	0	0	0	0	0	0	0	0	0	0	0.000114508	0	0	0	0	0	0	0	0	k__Bacteria;p__Proteobacteria;c__Alphaproteobacteria;o__Rhodobacterales;f__Rhodobacteraceae;g__Rubellimicrobium;s__
OTU_1591	0	0	0	0	0	0	0	0	0	0	0	0	0	0	0	0	0	0	0	0	k__Bacteria
OTU_1592	0	0	0	0	0	0	0	0	0	0	0	0	0	0	0	0	0	0	0	0	k__Bacteria
OTU_1593	0	0	0	0	3.81694e-05	0	0	0	0	0	0	3.81694e-05	0	0	0	0	0	0.000190847	0	0	k__Bacteria;p__Bacteroidota;c__Bacteroidia;o__Bacteroidales;f__Rikenellaceae;g__Rikenellaceae_RC9_gut_group;s__
OTU_1594	0	0	0	0	0	0	0	0	0	0	0	0	0	0	0	0	0	0	0	0	k__Bacteria;p__Firmicutes;c__Clostridia;o__Lachnospirales;f__Lachnospiraceae;g__[Eubacterium]_ruminantium_group;s__
OTU_1595	0	0	0	0	0	0.000190847	0	0	0	0	0	0	0.000152678	0	0	0	0	0	0	0	k__Bacteria;p__Myxococcota;c__Myxococcia;o__Myxococcales;f__Anaeromyxobacteraceae;g__Anaeromyxobacter;s__
OTU_1596	0	0	0	0	0	0	0	0	0	0	0	0	0	0	0	0	0	0	0	0	k__Bacteria;p__unidentified_Bacteria
OTU_1597	0	0	0	0	0	0	0	0	0	0	0	0	0	0	0	0	0	0	0	0	k__Bacteria;p__Firmicutes;c__Negativicutes;o__Acidaminococcales;f__Acidaminococcaceae;g__Acidaminococcus;s__
OTU_1598	0	0	0	0	0	0	0	0	0	0	0	0	0	0	0	0	0	0	0	0	k__Bacteria;p__Proteobacteria;c__Alphaproteobacteria;o__Sphingomonadales;f__Sphingomonadaceae;g__Sphingobium
OTU_1599	0	0	0	0	0	0	0	3.81694e-05	0	0	0	0	0	0	0	0	0	0	0	0	k__Bacteria;p__Methylomirabilota;c__Methylomirabilia;o__Rokubacteriales;f__;g__;s__
OTU_1600	0	0	0	0	0	0	0	0	0	0	0	0	0	0	0	0	0	0	0	0	Unknown
OTU_1601	0	0	0	3.81694e-05	0	0	0	0	0	0	0	0	0	0	0	0	0	0	0	3.81694e-05	k__Bacteria;p__Firmicutes;c__Clostridia;o__Peptostreptococcales-Tissierellales;f__Anaerovoracaceae;g__[Eubacterium]_brachy_group;s__
OTU_1602	0	0	0	0	0	0	0	0	0	0	0	0	0	0	0	0	0	0	0	0	k__Bacteria;p__Proteobacteria;c__Alphaproteobacteria;o__Acetobacterales;f__Acetobacteraceae;g__Roseomonas;s__Roseomonas_cervicalis
OTU_1603	0	0	0	0	0	0	0	0	0	0	0	0	0	0	0	0	0	0	0	0	k__Archaea;p__Halobacterota;c__Methanosarcinia;o__Methanosarciniales;f__Methanosarcinaceae;g__Methanococcoides;s__
OTU_1604	0	0	0	0	0	0	0	0.000190847	0	0.000114508	0.000152678	0	0	0	0	0	0	0	0	0	k__Bacteria
OTU_1605	0	0	0	0	0	0	7.63388e-05	0	0	0	0	0	0.000114508	0	0	0	3.81694e-05	0	0	0	k__Bacteria
OTU_1606	0	0	0	0	0	0	0	0	0	0	0	3.81694e-05	0	0	0	0	0	0	0	0	k__Bacteria;p__unidentified_Bacteria;c__Anaerolineae;o__Caldilineales;f__Caldilineaceae;g__;s__
OTU_1607	0	0	0	0	0	0	0	0	0	0	0	0	0.000229016	0	0	0	0	0	0	0	k__Bacteria;p__Proteobacteria;c__Gammaproteobacteria;o__Burkholderiales;f__Comamonadaceae
OTU_1608	0	0	0	0	3.81694e-05	0	0	0	0	0	0	0	0	0	0	0	3.81694e-05	0	7.63388e-05	0	k__Bacteria;p__Bacteroidota;c__Bacteroidia;o__Bacteroidales;f__Rikenellaceae;g__Alistipes;s__Alistipes_sp_N15.MGS-157
OTU_1609	0	0	0	0	0	0	0.000114508	0	0	0	0	0	0	0	0	0	0	0	0	0	k__Bacteria;p__unidentified_Bacteria;c__Coriobacteriia;o__Coriobacteriales;f__;g__;s__
OTU_1610	0	0	0	0	0	0	0	0	0	0	0	0	0	0	0	0	0	0	0	0	k__Bacteria;p__Bacteroidota;c__Bacteroidia;o__Sphingobacteriales;f__Sphingobacteriaceae;g__Pedobacter;s__Pedobacter_glucosidilyticus
OTU_1611	0	0	0	0	0	0	0	3.81694e-05	7.63388e-05	0	0	0	0	0	0	0	0	0	0	0	k__Bacteria;p__Nitrospirota;c__Nitrospira;o__Nitrospirales;f__Nitrospiraceae;g__unidentified_Nitrospiraceae;s__Nitrospirae_bacterium_RIFCSPLOWO2_01_FULL_62_17
OTU_1612	0	0	0	0	0	0	0	0	0	0	0	0	0	0	0	0	0	0	0	0	k__Bacteria
OTU_1613	0	0	0	0	0	0	0	0	0	0	0	0	0	0	0	0	0	0	0	0	k__Bacteria;p__unidentified_Bacteria;c__Vicinamibacteria;o__Vicinamibacterales;f__;g__;s__
OTU_1614	0	0	0	0	0	0	0	0	0	0	0	0	0	0	0	0	0	0	0	0	k__Bacteria;p__Acidobacteriota;c__Holophagae;o__Subgroup_7;f__;g__;s__
OTU_1615	0	0	0	0	0	0	0	0	0	0	0	0	0	0	0	0	0	0	0	0	k__Bacteria;p__Verrucomicrobiota;c__Verrucomicrobiae;o__Pedosphaerales;f__Pedosphaeraceae;g__;s__
OTU_1616	0	0	0	0	0	0	0	0	0	0	0	0	0	0	0	0	0	0	0	0	k__Archaea;p__Crenarchaeota;c__Nitrososphaeria;o__Nitrosotaleales;f__Nitrosotaleaceae;g__Candidatus_Nitrosotalea;s__
OTU_1617	0	0	0	0	0	0	0	0	0	0	0	0	0	0	0	0	0	0	0	0	k__Bacteria;p__Chloroflexi;c__Dehalococcoidia;o__S085;f__;g__;s__
OTU_1618	0	0	0	0	0	0	0	0	0	0	0	0	0	0	0	0	0	0	0	0	k__Bacteria
OTU_1619	0	0	0	0	0	0	0	0	0	0	0	0	0	0	0	0	0	0	0	0	k__Bacteria;p__Verrucomicrobiota;c__Verrucomicrobiae;o__Pedosphaerales;f__Pedosphaeraceae;g__ADurb.Bin063-1
OTU_1620	0	0	0	0	0	0.000190847	0	0	3.81694e-05	7.63388e-05	0.000229016	0	7.63388e-05	0	0	0	0	0	0	0	k__Bacteria;p__unidentified_Bacteria;c__Bacteroidia;o__Cytophagales;f__Microscillaceae;g__;s__
OTU_1621	0	0	0	0	0	0	0	0.000190847	0.000152678	0.000114508	0.000114508	0	0	0	0	0	0	0	0	0	k__Bacteria;p__Chloroflexi;c__Dehalococcoidia;o__S085;f__;g__;s__
OTU_1622	0	0	0	0	0	0	0	0	0	0	0	0	0	0	0	0	0	0	0	0	k__Bacteria;p__Acidobacteriota;c__Acidobacteriae;o__Subgroup_2;f__;g__;s__
OTU_1623	0	0	0	0	0	0	0	0	0.000114508	7.63388e-05	0	0	0	0	0	0	0	0	0	0	k__Bacteria;p__Actinobacteriota;c__Acidimicrobiia;o__IMCC26256;f__;g__;s__
OTU_1624	0	0	0	0	0	0	0	3.81694e-05	0	3.81694e-05	3.81694e-05	0	0	0	0	0	0	0	0	0	k__Bacteria;p__Acidobacteriota;c__Acidobacteriae;o__Bryobacterales;f__Bryobacteraceae;g__Bryobacter;s__
OTU_1625	0	0	0	0	0	0	0	0	0	0	0	0	0	0	0	0	0	0	0	0.000114508	k__Bacteria;p__unidentified_Bacteria;c__Spirochaetia;o__Spirochaetales;f__Spirochaetaceae;g__;s__
OTU_1626	0	0	0	0	0	0	0	0	0	3.81694e-05	3.81694e-05	3.81694e-05	0	0	0	0	0	0	0	0	k__Bacteria;p__Proteobacteria;c__Alphaproteobacteria;o__Caulobacterales;f__Caulobacteraceae;g__Phenylobacterium;s__
OTU_1627	0	0	0	0	0	0	0	0	0	0	0	0	0	0	0	0	0	0	0	0	k__Bacteria;p__unidentified_Bacteria;c__Alphaproteobacteria;o__Elsterales;f__;g__;s__
OTU_1628	0	0	0	0	0	0.000114508	0	0	0	0	0	0	0	0	0	0	0	0	0	0	k__Bacteria;p__Proteobacteria;c__Gammaproteobacteria;o__Burkholderiales;f__Nitrosomonadaceae;g__mle1-7;s__
OTU_1629	0	0	0	0	0	0	0	0	0	0	0	0	0	0	0	0	0	0	0	0	k__Bacteria;p__Acidobacteriota;c__Blastocatellia;o__11-24;f__;g__;s__
OTU_1630	0	0	0	0	0	0	0	0	0	0	0	0	0	0	0	0	0	0	0	0	k__Bacteria;p__Gemmatimonadota;c__AKAU4049;o__;f__;g__;s__
OTU_1631	0	0	0	0	0	0	0	0	0	0	0	0	0	0	0	0	0	0	0	0	k__Bacteria;p__Gemmatimonadota;c__AKAU4049;o__;f__;g__;s__
OTU_1632	0	0	0	0	0	0	0	0	0	0	0	0	0.000305355	0	0	0	0	0	0	0	k__Bacteria;p__unidentified_Bacteria;c__Gammaproteobacteria;o__Steroidobacterales;f__Steroidobacteraceae
OTU_1633	0	0	0	0	0	0	0	0	0	0	0	0	0	0	0	0	0	0	0	0	k__Bacteria;p__Firmicutes;c__Clostridia
OTU_1634	0	0	0	0	0	7.63388e-05	0	0	0	0	0	0	0	0	0	0	0	0	0	0	k__Bacteria;p__Bacteroidota;c__SJA-28;o__;f__;g__;s__
OTU_1635	0	0	0	0	0	0	0	3.81694e-05	7.63388e-05	3.81694e-05	0	0	0	0	0	0	0	0	0	0	k__Bacteria
OTU_1636	0	0	0	0	0	0	0	0	0	0	0	0.000229016	0	0	0	0	0	0	0	0	k__Bacteria;p__Acidobacteriota;c__Acidobacteriae;o__Bryobacterales;f__Bryobacteraceae;g__Bryobacter;s__
OTU_1637	0	0	0	0	0	0	0	0.000152678	0.000114508	0.000114508	0.000114508	0	0.000381694	0	0	0	0	0	0	0.000343525	k__Bacteria;p__Acidobacteriota;c__Vicinamibacteria;o__Vicinamibacterales;f__Vicinamibacteraceae;g__;s__
OTU_1638	0	0	0	0	0	0	0	0	0	0	0	0	0	0.000496202	0.000152678	0	0	0	0	0	k__Bacteria;p__Firmicutes;c__Bacilli;o__RF39;f__;g__;s__
OTU_1639	0	0	0	0	0	0	0	0	0	0	0	0	0	0	0	0	0	0	0	0	k__Bacteria;p__unidentified_Bacteria;c__Thermoleophilia;o__Gaiellales;f__;g__;s__
OTU_1640	0	0	0	0	0	0	0	0	0	0	0	0	0	0	0	0	0	0	0	0	k__Bacteria;p__Bacteroidota;c__Bacteroidia;o__Bacteroidales;f__Porphyromonadaceae;g__Porphyromonas;s__Porphyromonas_uenonis
OTU_1641	0	0	0	0	0	0	0	0	0	3.81694e-05	7.63388e-05	3.81694e-05	0	0	0	0	0	0	0	0	k__Bacteria;p__Actinobacteriota;c__Actinobacteria;o__Micrococcales;f__Microbacteriaceae;g__Agromyces
OTU_1642	0	0	0	0	0	0	0	0	0	0	0	0	0	0	0	0	0	0	0	0	k__Bacteria;p__DTB120
OTU_1643	0	0	0	0	0	0	0	0	0	0	0	0	0	0	0	0	0	0	0	0	k__Bacteria;p__Chloroflexi;c__KD4-96;o__;f__;g__;s__
OTU_1644	0	0	0	0	0	0	0	0	0	0	0	0	0	0	0	0	0	0	0	0.000152678	k__Bacteria;p__Firmicutes;c__Clostridia;o__Oscillospirales;f__Butyricicoccaceae;g__UCG-008;s__
OTU_1645	0	0	0	0	0	0	0	0	0	0	0	0	0	0	0	0	0	0	0	0.000572541	k__Bacteria;p__Acidobacteriota;c__Acidobacteriae;o__Subgroup_2;f__;g__;s__
OTU_1646	0	0	0	0	0	0	0	0	0	0	0	0	0	0	0	0	0	0	0	0	k__Bacteria;p__unidentified_Bacteria;c__Saccharimonadia;o__Saccharimonadales;f__LWQ8;g__;s__
OTU_1647	0	0	0	0	0	7.63388e-05	0	0	0	0	0	0	0	0	0	0	0	3.81694e-05	0	0.000267186	k__Bacteria;p__unidentified_Bacteria;c__Anaerolineae;o__Anaerolineales;f__Anaerolineaceae;g__;s__
OTU_1648	0	0	0	0	0	0	0	0	0	3.81694e-05	3.81694e-05	0	7.63388e-05	0	0	0	0	0	0	7.63388e-05	k__Bacteria;p__Proteobacteria;c__Alphaproteobacteria;o__Ferrovibrionales;f__Ferrovibrionaceae;g__Ferrovibrio;s__
OTU_1649	0	0	0	0	0	0	0	3.81694e-05	0	3.81694e-05	7.63388e-05	0	0	0	0	0	0	0	0	0	k__Bacteria;p__Proteobacteria;c__Gammaproteobacteria;o__Burkholderiales;f__Nitrosomonadaceae;g__MND1;s__
OTU_1650	0	0	0	0	0	0	0	0	0	0	0	0	0	0	0	0	0	0	0	0	k__Bacteria;p__Firmicutes;c__Clostridia;o__unidentified_Clostridia;f__Hungateiclostridiaceae;g__Ruminiclostridium;s__
OTU_1651	0	0	0	0	0	3.81694e-05	0	0	3.81694e-05	7.63388e-05	3.81694e-05	0	7.63388e-05	0	0	0	0	0	0	0	k__Bacteria;p__Proteobacteria;c__Alphaproteobacteria;o__Sphingomonadales;f__Sphingomonadaceae;g__Altererythrobacter;s__
OTU_1652	0	0	0	0	0	0.000381694	0	0	0	0	0	0	0.000152678	0	0	0	0	0	0	0	k__Bacteria;p__Myxococcota;c__Polyangia;o__Polyangiales;f__BIrii41;g__;s__
OTU_1653	0	0	0	0	0	0	0	0	0	3.81694e-05	3.81694e-05	0	0	0	0	0	0	0	0	7.63388e-05	k__Bacteria;p__unidentified_Bacteria;c__Anaerolineae;o__Anaerolineales;f__Anaerolineaceae;g__;s__
OTU_1654	0	0	0	0	0	0	0	0	0	0	0	0	0	0	0	0	0	0	0	0	k__Bacteria;p__Bacteroidota;c__Bacteroidia;o__Bacteroidales;f__F082;g__unidentified_F082;s__Bacteroidia_bacterium_feline_oral_taxon_141
OTU_1655	0	0	0	0	0	0	0	3.81694e-05	0	0	0	0	0	0	0	0	0	0	0	0	k__Bacteria;p__Bacteroidota;c__Bacteroidia;o__Cytophagales;f__Hymenobacteraceae;g__Adhaeribacter;s__
OTU_1656	0	0	0	0	0	0	0	0	0	3.81694e-05	3.81694e-05	0	0	0	0	0	0	0	0	0	k__Bacteria;p__Actinobacteriota;c__Rubrobacteria;o__Rubrobacterales;f__Rubrobacteriaceae;g__Rubrobacter;s__
OTU_1657	0	0	0	0	0	0	0	0	0	0	0	0	0	0	0	0	0	0	0	0	k__Bacteria;p__Bacteroidota;c__Bacteroidia
OTU_1658	0	0	0	0	0	0	0	0	0	0	0	0	0	0	0	0	0	0	0	0	k__Bacteria;p__Firmicutes;c__Clostridia;o__Oscillospirales;f__UCG-010
OTU_1659	0	0	0	0	0	0	0	0	0	0	0	0	0	0	0	0	0	0	0	0	k__Bacteria;p__Chloroflexi;c__Anaerolineae;o__;f__;g__;s__
OTU_1660	0	0	0	0	0	0	0	0	0	0	0	0	0	0	0	0	0	0	0	0	k__Bacteria
OTU_1661	0	0	0	0	0	0	0	0	0	0	0	0	0	0	0	0	0	0	0	0	k__Bacteria;p__Firmicutes;c__Clostridia;o__Oscillospirales;f__Ruminococcaceae;g__[Eubacterium]_siraeum_group;s__
OTU_1662	0	0	0	0	0	0	0	0	0	0	0	0	0	0	0	0	0	0	0	0.000114508	k__Bacteria;p__Bacteroidota;c__Bacteroidia;o__Chitinophagales;f__Chitinophagaceae;g__Taibaiella;s__
OTU_1663	0	0	0	0	0	0	0	0	0	0	0	0	0	0	0	0	0	0	0	3.81694e-05	k__Bacteria;p__Firmicutes;c__Clostridia;o__Oscillospirales;f__Oscillospiraceae;g__Oscillibacter;s__
OTU_1664	0	0	0	0	0	3.81694e-05	0	0	0	0	0	0	0.000114508	0	0	0	0	0	0	0	k__Bacteria;p__unidentified_Bacteria;c__Thermodesulfovibrionia;o__;f__;g__;s__
OTU_1665	0	0	0	0	0	0	0	0	0	0	0	0	0	0	0	0	0	0	0	0	Unknown
OTU_1666	0	0	0	0	0	0	0	0	0	0	0	0	0.000419863	0	0	0	0	0	0	0	k__Bacteria;p__Bacteroidota;c__Bacteroidia;o__Flavobacteriales;f__NS9_marine_group;g__;s__
OTU_1667	0	0	0	0	0	0	0	0	0	0	0	0	0	0	0	0	0	0	0	0	k__Bacteria;p__Actinobacteriota;c__Actinobacteria;o__Corynebacteriales;f__Corynebacteriaceae;g__Corynebacterium;s__Corynebacterium_durum
OTU_1668	0	0	0	0	0	0	0	0	0	0	0	0	0	0	0	0	0	0	0	0	k__Bacteria;p__Bacteroidota;c__Bacteroidia;o__Bacteroidales;f__Prevotellaceae;g__Alloprevotella;s__
OTU_1669	0	0	0	0	0	0.000190847	0	3.81694e-05	0	0	0	0	7.63388e-05	0	0	0	0	0	0	0	k__Bacteria
OTU_1670	0	0	0	0	0	0	0	0	0	0	0	0	0	0	0	0	0	0	0	0	k__Bacteria;p__Firmicutes;c__Clostridia;o__Peptostreptococcales-Tissierellales;f__Anaerovoracaceae;g__Family_XIII_AD3011_group;s__
OTU_1671	0	0	0	0	0	0	0	0	0	0	0	0	0	0	0	0	0	0	0	0	k__Bacteria;p__unidentified_Bacteria;c__Saccharimonadia;o__Saccharimonadales
OTU_1672	0	0	0	0	0	0	0	0	0	0	0	7.63388e-05	0	0	0	0	0	0	0	0	k__Bacteria;p__Firmicutes;c__Clostridia;o__Peptostreptococcales-Tissierellales;f__Anaerovoracaceae;g__Family_XIII_AD3011_group;s__
OTU_1673	0	0	0	0	0	0	0	0	0	0	0	0	0	0	0	0	0	0	0	0	k__Bacteria
OTU_1674	0	0	0	0	0	0	0	0	0	0	0	0.000343525	0	0	0	0	0	0	0	0	k__Bacteria
OTU_1675	0	0	0	0	0	3.81694e-05	0	0	0	0	0	0	0.000114508	0	0	0	0	0	0	0	k__Bacteria;p__Myxococcota;c__Polyangia;o__Haliangiales;f__Haliangiaceae;g__Haliangium
OTU_1676	0	0	0	0	0	0	0	0	0	0	0	0	0	0	0	0	0	0	0	0	Unknown
OTU_1677	0	0	0	0	0	0	0	0	0	0	0	0	0	0	0	0	0	0	0	0.000114508	k__Bacteria;p__Actinobacteriota
OTU_1678	0	0	0	0	0	0	0	0	0	0	0	0	0	0	0	0	0	0	0	0	k__Bacteria;p__unidentified_Bacteria;c__Ktedonobacteria;o__Ktedonobacterales;f__Ktedonobacteraceae;g__;s__
OTU_1679	0	0	0	0	0	0	0	3.81694e-05	3.81694e-05	0	0	0	0	0	0	0	0	0	0	0	k__Bacteria;p__Acidobacteriota;c__Acidobacteriae;o__PAUC26f;f__;g__;s__
OTU_1680	0	0	0	0	0	0	0	0	0	0	0	0	0	0	0	0	0	0	0	0	k__Bacteria;p__Firmicutes;c__Clostridia;o__Oscillospirales;f__UCG-010;g__;s__
OTU_1681	0	0	0	0	0	0	0	0	0	0	7.63388e-05	0	0	0	0	0	0	0	0	0	k__Bacteria;p__Acidobacteriota;c__Holophagae;o__Subgroup_7;f__;g__;s__
OTU_1682	0	0	0	7.63388e-05	0	0	0	0	0	0	0	0	0	0	0	0	0	0	0	0.000229016	k__Bacteria;p__Firmicutes;c__Clostridia;o__Christensenellales;f__Christensenellaceae;g__Christensenellaceae_R-7_group;s__
OTU_1683	0	0	0	0	0	0	0	0	0	0	0	0	0	0	0	0	0	0	0	0	k__Bacteria
OTU_1684	0	0	0	0	0	3.81694e-05	0	0	3.81694e-05	0	0	0	0	0	0	0	0	0	0	3.81694e-05	k__Bacteria;p__Actinobacteriota;c__MB-A2-108;o__;f__;g__;s__
OTU_1685	0	0	0	0	0	0	0	0	0	0	0	0	0	0	0	0	0	0	0	0	k__Bacteria;p__Spirochaetota;c__Spirochaetia;o__Spirochaetales;f__Spirochaetaceae;g__Treponema;s__
OTU_1686	0	0	0	0	0	0	0	0	0	0	0	0	0	0	0	0	0	0	0	0	k__Bacteria;p__unidentified_Bacteria;c__unidentified_Bacteria;o__Gemmatimonadales;f__Gemmatimonadaceae;g__;s__
OTU_1687	0	0	0	0	0	0	0	0	0	0	0	0	0	0	0	0	0	0	0	0	k__Bacteria;p__Acidobacteriota;c__Acidobacteriae;o__Subgroup_2;f__;g__;s__
OTU_1688	0	0	0	0	0	0	0	0	0	0	0	0	0	0	0	0	0	0	0	0	k__Bacteria
OTU_1689	0	0	0	0	0	0	0	0	0	0	0	0	0	0	0	0	0	0	0	0	k__Bacteria;p__Proteobacteria;c__Gammaproteobacteria;o__Oceanospirillales;f__Halomonadaceae;g__Halomonas
OTU_1690	0	3.81694e-05	0.000152678	0	0	3.81694e-05	3.81694e-05	0	0	0	0	0	0	0	0	0	0	0	0	0	k__Bacteria;p__Bacteroidota;c__Bacteroidia;o__Bacteroidales;f__Muribaculaceae;g__;s__
OTU_1691	0	0	0	0	0	0	0	0	0	0	0	0	0	0	0	0	0	0	0	0	k__Bacteria;p__Bacteroidota;c__Bacteroidia;o__Sphingobacteriales;f__env.OPS_17;g__;s__
OTU_1692	0	0	0	0	0	0	0	0	0	0	0	0	0	0	0	0	0	0	0	0	k__Bacteria;p__Acidobacteriota;c__Acidobacteriae;o__Subgroup_15;f__;g__;s__
OTU_1693	0	0	0	0	0	0	0	0	0	0	0	0	0	0	0	0	0	0	0	0	k__Bacteria;p__unidentified_Bacteria;c__Acidobacteriae;o__Acidobacteriales;f__;g__;s__
OTU_1694	0	0	0	0	0	0	0	0	0	0	0	0	0	0	0	0	0	0	0	0	k__Bacteria;p__Bacteroidota;c__Bacteroidia;o__Sphingobacteriales;f__env.OPS_17;g__;s__
OTU_1695	0	0	0	0	0	0	0	0	0	0	0	0	0	0	0	0	0	0	0	0	k__Bacteria;p__Entotheonellaeota;c__Entotheonellia;o__Entotheonellales;f__Entotheonellaceae;g__;s__
OTU_1696	0	0	0	0	0	0	0	0	0	0	0	0	0	0	0	0	0	0	0	0	k__Bacteria;p__Bacteroidota;c__Bacteroidia;o__Bacteroidales;f__Prevotellaceae;g__Prevotellaceae_UCG-004;s__
OTU_1697	0	0	0	0	0	0	0	0	0	0	0	0	3.81694e-05	0	0	0	0	0	0	0	k__Bacteria;p__unidentified_Bacteria;c__Alphaproteobacteria;o__Rhizobiales;f__;g__;s__
OTU_1698	0	0	0	0	0	0	0	0	0	7.63388e-05	0	0	0	0	0	0	0	0	0	0	k__Bacteria
OTU_1699	0	0	0	0	0	0	0	0	0	0	0	0	0	0	0	0	0	0	0	3.81694e-05	k__Bacteria;p__Kryptonia;c__unidentified_Kryptonia;o__Kryptoniales;f__BSV26;g__;s__
OTU_1700	0	0	0	0	0	0	0	0	7.63388e-05	0	0	0	0	0	0	0	0	0	0	0	k__Bacteria;p__Actinobacteriota;c__Actinobacteria;o__Pseudonocardiales;f__Pseudonocardiaceae;g__Amycolatopsis
OTU_1701	0	0	0	3.81694e-05	3.81694e-05	0	0	0	0	0	0	0	0	0	0	0	0	0	0	7.63388e-05	k__Bacteria;p__Actinobacteriota;c__Coriobacteriia;o__Coriobacteriales;f__Coriobacteriaceae;g__Enorma
OTU_1702	0	0	0	0	0	0	0	0	0	0	0	0	0	0	0	0	0	0	0	0	k__Bacteria;p__unidentified_Bacteria;c__unidentified_Bacteria;o__unidentified_Bacteria;f__unidentified_Bacteria;g__unidentified_Bacteria;s__Myxococcales_bacterium_enrichment_culture_clone_11380
OTU_1703	0	0	0	0	0	0	0	0	0	0	0	0	3.81694e-05	0	0	0	0	0	0	7.63388e-05	k__Bacteria;p__unidentified_Bacteria;c__unidentified_Bacteria;o__unidentified_Bacteria;f__unidentified_Bacteria;g__unidentified_Bacteria;s__delta_proteobacterium_WX81
OTU_1704	0	0	0	0	0	0	0	0	0	0	0	7.63388e-05	0	0	0	0	0	0	0	0	k__Bacteria
OTU_1705	0	0	0	0	0	0	0	0	0	0	0	3.81694e-05	0.000190847	3.81694e-05	7.63388e-05	0	0	3.81694e-05	0	0	k__Bacteria;p__Actinobacteriota
OTU_1706	3.81694e-05	0	0	3.81694e-05	3.81694e-05	0	0	0	0	0	0	0.000114508	0	0	0	0	0.000381694	0	0	0.000114508	k__Bacteria;p__Firmicutes;c__Clostridia;o__Oscillospirales;f__Oscillospiraceae;g__UCG-005;s__
OTU_1707	0	0	0	0	0	0	0	0	0	0	0	0	0	0	0	0	0	0	0	0	k__Bacteria;p__unidentified_Bacteria;c__Saccharimonadia;o__Saccharimonadales
OTU_1708	0	0	0	0	0	0	0	0	0	0	0	0	0.000687049	0	0	0	0	0	0	0	k__Bacteria;p__Proteobacteria;c__Gammaproteobacteria;o__Burkholderiales;f__Rhodocyclaceae;g__Azoarcus;s__Azoarcus_sp_KH32C
OTU_1709	0	0	0	0	0	3.81694e-05	0	0	0	0	0	0	0	0	0	0	0	0	0	0	k__Archaea;p__Crenarchaeota;c__Nitrososphaeria;o__Nitrososphaerales;f__Nitrososphaeraceae
OTU_1710	0	0	0	0	0	0	0	0	0	0	0	0.000114508	0	0	0	0	0	0	0	0	k__Bacteria;p__unidentified_Bacteria;c__Acidimicrobiia
OTU_1711	0	0	0	0	0	0	0	3.81694e-05	0	0	0	0	0	0	0	0	0	0	0	0	k__Bacteria;p__Firmicutes;c__Bacilli;o__Lactobacillales;f__Lactobacillaceae;g__Lactobacillus;s__Lactobacillus_intestinalis
OTU_1712	0	0	0	0	0	0	0	0	0	0	0	0	0	0	0	0	0	0	0	0	k__Bacteria;p__unidentified_Bacteria;c__unidentified_Bacteria;o__Gemmatimonadales;f__Gemmatimonadaceae;g__;s__
OTU_1713	0	0	0	0	0	3.81694e-05	3.81694e-05	0	0	0	0	0	0.000190847	7.63388e-05	3.81694e-05	0	0	0	3.81694e-05	0	k__Bacteria;p__Firmicutes;c__Clostridia;o__Lachnospirales;f__Lachnospiraceae;g__Tyzzerella
OTU_1714	0	0	0	0	0	0	0	0	0	0	0	0	0	0	0	0	0	0	0	0	k__Bacteria;p__Actinobacteriota;c__Thermoleophilia;o__Solirubrobacterales;f__67-14;g__;s__
OTU_1715	0	0	0	0	0	0	0	3.81694e-05	0	0	0	0	0	0	0	0	0	0	0	0	k__Bacteria;p__Proteobacteria;c__Gammaproteobacteria;o__Diplorickettsiales;f__Diplorickettsiaceae;g__Aquicella;s__
OTU_1716	0	0	0	3.81694e-05	0	0	0	0	0	0	0	3.81694e-05	0	0	0	0	0	3.81694e-05	0	0	k__Bacteria;p__unidentified_Bacteria;c__Bacteroidia;o__Bacteroidales;f__;g__;s__
OTU_1717	0	0	0	0	0	0	0	0	0	0	0	0	0	0	0	0	0	0	0	0	k__Bacteria;p__Bacteroidota;c__Bacteroidia;o__Bacteroidales;f__Prevotellaceae;g__Alloprevotella;s__
OTU_1718	0	0	0	0	0	0	0	0	0	0	0	0	0	0	0	0	0	0	0	0.000305355	k__Bacteria;p__Actinobacteriota;c__Actinobacteria;o__0319-7L14;f__;g__;s__
OTU_1719	0	0	0	0	0	0	0	0	0	0	0	3.81694e-05	0	0	0	0	0	0	0	0	k__Bacteria;p__Firmicutes;c__Bacilli;o__Lactobacillales;f__Streptococcaceae;g__Streptococcus
OTU_1720	0	0	0	0	0	0	0	0	0	0	0	0	0.000229016	0	0	0	0	0	0	0	k__Bacteria;p__Bacteroidota;c__Ignavibacteria;o__Ignavibacteriales;f__PHOS-HE36;g__;s__
OTU_1721	0	0	0	0	0	0	0	3.81694e-05	0	0	0	0	0	0	0	0	0	0	0	0	k__Bacteria;p__Firmicutes;c__Bacilli;o__Bacillales;f__Bacillaceae;g__Ureibacillus;s__
OTU_1722	0	0	0	0	0	0	0	0	0	0	0	0	0	0	0	0	0	0	0	0	k__Bacteria;p__unidentified_Bacteria;c__Saccharimonadia;o__Saccharimonadales;f__LWQ8;g__;s__
OTU_1723	0	0	0	0	0	0	0	0	0	0	0	0	0	0	0	0	0	0	0	0	k__Bacteria;p__Proteobacteria;c__Gammaproteobacteria;o__Xanthomonadales;f__Rhodanobacteraceae
OTU_1724	0	0	0	0	0	0	0	3.81694e-05	0	0	3.81694e-05	0	0	0	0	0	0	0	0	7.63388e-05	k__Bacteria;p__unidentified_Bacteria;c__Bacteroidia;o__Cytophagales;f__Microscillaceae;g__;s__
OTU_1725	0	0	0	0	0	0	0	0	0	0	0	0	0	0	0	0	0	0	0	0	k__Bacteria;p__Firmicutes;c__Bacilli;o__Erysipelotrichales;f__Erysipelotrichaceae;g__Dielma;s__Dielma_fastidiosa
OTU_1726	7.63388e-05	7.63388e-05	0.000343525	0.000190847	3.81694e-05	7.63388e-05	0.000114508	3.81694e-05	0	7.63388e-05	0	0.000343525	3.81694e-05	7.63388e-05	7.63388e-05	0	0.000152678	0	0	0	k__Bacteria;p__Bacteroidota;c__Bacteroidia;o__Bacteroidales;f__Muribaculaceae;g__;s__
OTU_1727	0	0	0	0	0	0	0	0	0	0	0	0	0	0	0	0	0	0	0	0	k__Bacteria;p__Chloroflexi;c__Ktedonobacteria;o__Ktedonobacterales;f__JG30-KF-AS9;g__;s__
OTU_1728	0.000381694	0.000114508	0	0	0	0	0.000152678	0	0	0	0	0	0	0.000343525	0.000916065	0.000458033	0	0	0.00587809	0	k__Bacteria;p__Bacteroidota;c__Bacteroidia;o__Bacteroidales;f__Rikenellaceae;g__Alistipes;s__
OTU_1729	0	0	0	0	0	0	0	0	0	0	0	0	3.81694e-05	0	0	0	0	0	0	0	k__Bacteria;p__unidentified_Bacteria;c__Alphaproteobacteria;o__;f__;g__;s__
OTU_1730	0	0	0	0	0	0	0	0	0	0	0	0	0	0	0	0	0	0	0	0	k__Bacteria;p__Firmicutes;c__Clostridia;o__Clostridia_vadinBB60_group;f__;g__;s__
OTU_1731	0	0	0	0	0	0	0	0	0	0	0	0	0	0	0	0	0	0	0	0	k__Bacteria;p__Chloroflexi;c__Ktedonobacteria;o__C0119;f__;g__;s__
OTU_1732	0	0	0	0	0	0	0	0	0	0	0	0	0	0	0	0	0	0	0	0	k__Bacteria
OTU_1733	0	0	0	0	0	0	0	0	0	0	0	0	0	0	0	0	0	0	0	0	k__Bacteria;p__Firmicutes;c__Clostridia;o__Oscillospirales;f__UCG-010;g__;s__
OTU_1734	0	0	0	0	0	0	0	0	0	0	0	0	0	0	0	0	0	0	0	0	k__Bacteria;p__Firmicutes;c__Clostridia;o__Oscillospirales;f__Ruminococcaceae;g__Ruminococcus;s__Ruminococcus_sp
OTU_1735	0	0	0	0	0	0	0	0	0	0	0	0	0	0	0	0	0	0	0	0	k__Bacteria
OTU_1736	0	0	0	0	0	3.81694e-05	0	0	0	0	0	0	0	0	0	0	0	0	0	0	k__Bacteria;p__Proteobacteria;c__Gammaproteobacteria;o__Acidiferrobacterales;f__Acidiferrobacteraceae;g__Sulfurifustis
OTU_1737	0	0	0	0	0	0	0	0	0	0	0	0	0	0	0	0	0	0	0	0	k__Bacteria;p__unidentified_Bacteria;c__Bacteroidia;o__Cytophagales;f__Microscillaceae;g__;s__
OTU_1738	0	0	0	0	0	0	0	0	0	0	0	0	0	0	0	0	0	0	0	0	k__Bacteria;p__Proteobacteria;c__Alphaproteobacteria;o__Rhizobiales
OTU_1739	0	0	0	0	0	0	0	0	0	0	0	0	0	0	0	0	0	0	0	0	k__Bacteria
OTU_1740	0	0	0	0	0	0	0	0	0	0	0	0	0	0	0	0	0	0	0	0	k__Bacteria;p__Entotheonellaeota;c__Entotheonellia;o__Entotheonellales;f__Entotheonellaceae;g__;s__
OTU_1741	0	0	0	0	0	0	0	0	0	0	0	0	0	0	0	0	0	0	0	0	k__Bacteria;p__Acidobacteriota;c__Blastocatellia;o__11-24;f__;g__;s__
OTU_1742	0	0	0	0	0	0	0	0	0	0	0	0	0	0	0	0	0	0	0	0	k__Bacteria;p__unidentified_Bacteria;c__Saccharimonadia;o__Saccharimonadales;f__LWQ8;g__;s__
OTU_1743	0	0	0	0	0	0	0	0	0	0	3.81694e-05	0	0	0	0	0	0	0	0	0.000152678	k__Bacteria;p__Bdellovibrionota;c__Bdellovibrionia;o__Bdellovibrionales;f__Bdellovibrionaceae;g__Bdellovibrio;s__
OTU_1744	0	0	0	0	0	3.81694e-05	0	0	0	0	0	0	3.81694e-05	0	0	0	0	0	0	0	k__Bacteria
OTU_1745	0	0	0	0	0	0	0	0	0	0	0	0	0.000229016	0	0	0	0	0	0	0	k__Bacteria;p__unidentified_Bacteria;c__Polyangia;o__Polyangiales;f__Sandaracinaceae
OTU_1746	0	0	0	0	0	0	0	0	0	0	0	0	0.000152678	0	0	0	0	0	0	0	k__Bacteria
OTU_1747	0	0	0	0	0	3.81694e-05	0	0	0	0	0	0	3.81694e-05	0	0	0	0	0	0	0	k__Bacteria;p__Actinobacteriota;c__Thermoleophilia;o__Solirubrobacterales;f__67-14;g__;s__
OTU_1748	0	0	0	0	0	0	0	0	0	0	0	0	0.000305355	0	0	0	0	0	0	0	k__Bacteria;p__Proteobacteria;c__Alphaproteobacteria;o__Caulobacterales;f__Parvularculaceae;g__Amphiplicatus;s__
OTU_1749	0	0	0	0	0	0	0	0	0	0	0	0	0	0	0	0	0	0	0	0	k__Bacteria;p__Firmicutes;c__Bacilli;o__Brevibacillales;f__Brevibacillaceae;g__Brevibacillus;s__Brevibacillus_agri
OTU_1750	0	0	0	0	0	0	0	0	0	0	0	0	0	0	0	0	0	0	0	0	k__Bacteria;p__Actinobacteriota;c__Actinobacteria;o__Micrococcales;f__Brevibacteriaceae;g__Brevibacterium
OTU_1751	0	0	0	0	0	0	0	0	0	0	0	0	0	0	0	0	0	0	0	0	k__Bacteria;p__Bacteroidota;c__Bacteroidia;o__Cytophagales;f__Microscillaceae;g__Ohtaekwangia;s__
OTU_1752	0	0	0	0	0	7.63388e-05	0	0	0	0	0	0	0	0	0	0	0	0	0	0	k__Bacteria;p__unidentified_Bacteria;c__Anaerolineae;o__Anaerolineales;f__Anaerolineaceae;g__;s__
OTU_1753	0	0	0	0	0	0	0	0	0	0	0	0	0	0	0	0	0	7.63388e-05	0	0	k__Bacteria;p__unidentified_Bacteria;c__Alphaproteobacteria;o__Rhodospirillales;f__;g__;s__
OTU_1754	0	0	0	0	0	0	0	0	0	0	0	0	0	0	0	0	3.81694e-05	0	0	0	k__Bacteria;p__Firmicutes;c__Clostridia
OTU_1755	0	0	0	0	0	0	0	0	0	0	0	0	7.63388e-05	0	0	0	0	0	0	0	k__Bacteria;p__Proteobacteria;c__Gammaproteobacteria;o__Burkholderiales;f__Comamonadaceae;g__Hydrogenophaga;s__
OTU_1756	0	0	0	0	0	0	0	3.81694e-05	0	0	0	0	7.63388e-05	0	0	0	0	0	0	0	k__Bacteria;p__Myxococcota;c__Polyangia;o__Haliangiales;f__Haliangiaceae;g__Haliangium;s__
OTU_1757	0	0	0	0	0	0	0	7.63388e-05	0	0	7.63388e-05	0	0	0	0	0	0	0	0	0	k__Bacteria;p__Proteobacteria;c__Gammaproteobacteria;o__Xanthomonadales;f__Xanthomonadaceae;g__Lysobacter
OTU_1758	0	0	0	0	0	0	0	0	0	0	0	0	0	0	0	0	0	0	0	0	k__Bacteria;p__Actinobacteriota;c__Actinobacteria;o__Propionibacteriales;f__Nocardioidaceae;g__Nocardioides
OTU_1759	0	0	0	0	0	0	0	3.81694e-05	0	0	0	3.81694e-05	0	0	0	0	0	0	0	0	k__Bacteria;p__unidentified_Bacteria;c__Thermoleophilia;o__;f__;g__;s__
OTU_1760	0	0	0	0	0	3.81694e-05	0	0	0	0	0	0	0.000229016	0	0	0	0	0	0	0	k__Bacteria;p__unidentified_Bacteria;c__Gammaproteobacteria;o__Burkholderiales;f__Hydrogenophilaceae;g__;s__
OTU_1761	0	0	0	0	0	0	0	0	0	0	0	0	0	0	0	0	0	0.000114508	0	0	k__Bacteria;p__Firmicutes;c__Clostridia;o__Oscillospirales;f__UCG-010;g__;s__
OTU_1762	7.63388e-05	0.000114508	0.000305355	0	0	0.00183213	3.81694e-05	7.63388e-05	0	0.000152678	3.81694e-05	0.00106874	0.000534372	3.81694e-05	3.81694e-05	0	0.000801557	0.000381694	0	0.000190847	k__Bacteria;p__Firmicutes;c__Bacilli;o__Erysipelotrichales;f__Erysipelotrichaceae;g__Faecalibaculum;s__
OTU_1763	0	0	0	0	0	0	0	0	0	0	0	0	0	0	0	0	0	0	0	0.000114508	k__Bacteria;p__Actinobacteriota;c__Acidimicrobiia;o__Microtrichales;f__Microtrichaceae;g__IMCC26207;s__
OTU_1764	0	0	0	0	0	0	0	0	0	0	0	0	0	0	0	0	0	0	0	0	k__Bacteria;p__Proteobacteria;c__Gammaproteobacteria;o__Burkholderiales;f__Neisseriaceae;g__Alysiella;s__
OTU_1765	0	0	0	0	0	0	0	3.81694e-05	0	3.81694e-05	3.81694e-05	0	0	0	0	0	0	0	0	0	k__Bacteria;p__Chloroflexi;c__P2-11E;o__;f__;g__;s__
OTU_1766	0	0	0	0	0	0	0	0	0	0	0	0	0	0	0	0	0	0	0	0	k__Bacteria;p__Acidobacteriota;c__Subgroup_5;o__;f__;g__;s__
OTU_1767	0	0	0	0	0	0	0	0	0	0	0	0.000114508	0	0	0	0	0	0	0	0	k__Bacteria;p__Myxococcota;c__Polyangia;o__Polyangiales;f__BIrii41;g__;s__
OTU_1768	0	0	0	0	0	0	0	0	0	0	0	0	0	0	0	0	0	0	0	0	k__Bacteria;p__Firmicutes;c__Clostridia;o__Peptostreptococcales-Tissierellales;f__Anaerovoracaceae;g__Family_XIII_AD3011_group;s__
OTU_1769	0.000190847	0.000229016	3.81694e-05	0	0	3.81694e-05	3.81694e-05	0	0	0	0	3.81694e-05	0.000305355	0	0.000114508	0	7.63388e-05	0	7.63388e-05	3.81694e-05	k__Bacteria
OTU_1770	0	0	0	0	0	0	0	0	0	0	0	0	0	0	0	0	0	0	0	0	k__Bacteria;p__Proteobacteria;c__Gammaproteobacteria;o__Burkholderiales;f__Nitrosomonadaceae;g__mle1-7;s__
OTU_1771	0	0	0	0	0	0	0	0	0	0	0	0	0	0	0	0	0	0	0	0	k__Bacteria;p__unidentified_Bacteria;c__Acidobacteriae;o__Acidobacteriales;f__;g__;s__
OTU_1772	0	0	0	0	0	0	0	0	0	0	0	0	3.81694e-05	0	0	0	0	0	0	0	k__Bacteria;p__Bacteroidota;c__Bacteroidia;o__Flavobacteriales;f__Flavobacteriaceae;g__Flavobacterium
OTU_1773	0	0	0	0	0	0	0	0	0	0	0	0	0	0	0	0	0	0	0	0	k__Bacteria;p__Firmicutes;c__Clostridia;o__unidentified_Clostridia;f__Ruminococcaceae;g__;s__
OTU_1774	0	0	0	0	0	0	0	0	0	0	0	0	0	0	0	0	0	0	0	0	k__Bacteria;p__unidentified_Bacteria;c__Bacilli;o__Erysipelotrichales;f__Erysipelotrichaceae;g__;s__
OTU_1775	0	0	0	7.63388e-05	0	0	0	0	0	0	0	0	0	0	0	0	3.81694e-05	0	0	3.81694e-05	k__Bacteria;p__Firmicutes;c__Clostridia;o__Lachnospirales;f__Lachnospiraceae;g__Coprococcus
OTU_1776	0.000381694	0.000114508	0.000534372	0.00255735	3.81694e-05	0.000839727	0.000381694	0	0	0	0	0.000305355	0.00061071	0.000114508	0.000725219	0.000190847	0.00122142	0.000152678	0.000381694	0.000572541	k__Bacteria;p__Firmicutes;c__Clostridia;o__Lachnospirales;f__Lachnospiraceae;g__Lachnospiraceae_NK4A136_group;s__
OTU_1777	0	0	0	0	0	0	0	0	0	0	0	0	0	0	0	0	0	0	0	0	k__Bacteria;p__Bacteroidota;c__SJA-28;o__;f__;g__;s__
OTU_1778	0	0	0	0	0	0	0	0	0	0	0	0	0	0	0	0	0	0	0	0.000152678	k__Bacteria;p__Proteobacteria;c__Gammaproteobacteria;o__Burkholderiales;f__Methylophilaceae;g__UBA6140;s__
OTU_1779	0	0	0	0	0	0	0	0	0	0	0	0	0	0	0	0	0	0	0	0	k__Bacteria
OTU_1780	0	0	0	0	0	0	0	0	0	0	0	0	0	0	0	0	0	0	0	0	k__Bacteria
OTU_1781	0	0	0	0	0	0	0	0	0	0	0	0	0	0	0	0	0	0	0	0	k__Bacteria;p__unidentified_Bacteria;c__Saccharimonadia;o__Saccharimonadales;f__LWQ8;g__;s__
OTU_1782	0	0	0	0	0	0	0	0	0	0	0	0	0	0	0	0	0	0	0	0	k__Bacteria;p__Myxococcota;c__Polyangia;o__Haliangiales;f__Haliangiaceae;g__Haliangium;s__
OTU_1783	0	0	0	0	0	0	0	0	0	0	0	0	0	0	0	0	0	7.63388e-05	0	0.000305355	k__Bacteria;p__Acidobacteriota;c__Aminicenantia;o__Aminicenantales;f__;g__;s__
OTU_1784	0	0	0	0	0	0	0	0	0	0	0	0	0	0	0	0	0	0	0	0	k__Bacteria;p__Verrucomicrobiota;c__Verrucomicrobiae;o__Chthoniobacterales;f__Chthoniobacteraceae;g__Candidatus_Udaeobacter;s__
OTU_1785	0	3.81694e-05	0.000114508	0.000381694	7.63388e-05	0.000152678	7.63388e-05	0	0	0	0	0	0.000267186	3.81694e-05	3.81694e-05	0	0	0	0	0.000305355	k__Bacteria;p__Desulfobacterota;c__Desulfovibrionia;o__Desulfovibrionales;f__Desulfovibrionaceae;g__Desulfovibrio;s__
OTU_1786	0	0	0	0	0	0	0	0	0	0	0	0	0	0	0	0	0	0	0	0.000114508	k__Bacteria;p__Campilobacterota;c__Campylobacteria;o__Campylobacterales;f__Campylobacteraceae;g__Campylobacter;s__
OTU_1787	0	0	0	0	0	0	0	0	0	0	0	0	0	0	0	0	0	0	0	0	k__Bacteria;p__Actinobacteriota;c__MB-A2-108;o__;f__;g__;s__
OTU_1788	0	0	0	0	0	0	0	0	0	0	0	0	7.63388e-05	0	0	0	0	0	0	0	k__Bacteria;p__unidentified_Bacteria;c__Alphaproteobacteria
OTU_1789	0	0	0	0	0	0	0	0	0	0	0	0	0	0	0	0	0	3.81694e-05	0	0	k__Bacteria;p__Firmicutes;c__Bacilli;o__Lactobacillales;f__Streptococcaceae;g__Streptococcus;s__Streptococcus_ferus
OTU_1790	0	0	0	0	0	0	0	0	0	0	0	0	0	0	0	0	0	0	0	0	k__Bacteria;p__Acidobacteriota;c__Thermoanaerobaculia;o__Thermoanaerobaculales;f__Thermoanaerobaculaceae;g__Subgroup_10;s__
OTU_1791	0	0	0	0	0	0	0	0	0	0	0	0	0	0	0	0	0	0	0	0	k__Bacteria;p__Bacteroidota;c__Bacteroidia;o__Bacteroidales;f__Prevotellaceae;g__Prevotella;s__Prevotella_sp_oral_clone_FW035
OTU_1792	0	0	0	0	0	0	0	0	0	0	0	0	0	0	0	0	0	0	0	0.000152678	k__Bacteria;p__unidentified_Bacteria;c__Thermoleophilia;o__Gaiellales;f__;g__;s__
OTU_1793	0	0	0	0	0	0	0	0	0	0	0	0	0.000114508	0	0	0	0	0	0	0	k__Bacteria;p__Myxococcota;c__Polyangia;o__Nannocystales;f__Nannocystaceae;g__;s__
OTU_1794	0	0	0	0	0	0	0	7.63388e-05	0	3.81694e-05	3.81694e-05	0	0	0	0	0	0	0	0	0	k__Bacteria;p__Chloroflexi;c__TK10;o__;f__;g__;s__
OTU_1795	0	0	0	0	0	0	0	0	0	0	0	0	0	0	0	0	0	0	0	0	k__Bacteria;p__Bacteroidota;c__Bacteroidia;o__Sphingobacteriales;f__Sphingobacteriaceae;g__Solitalea;s__Solitalea_canadensis
OTU_1796	0	0	0	0	0	0	0	0	0	0	0	0	0	0	0	0	0	0	0	0	k__Bacteria;p__Acidobacteriota;c__Acidobacteriae;o__Subgroup_13;f__;g__;s__
OTU_1797	0	0	0	0	0	0	0	0	0	0	0	0	0	0	0	0	0	0	0	0.000229016	k__Bacteria;p__Acidobacteriota;c__Vicinamibacteria;o__Subgroup_17;f__;g__;s__
OTU_1798	0	0	0	0	0	0	0	0	0	0	0	0	0	0	0	0	0	0	0	0	k__Bacteria;p__Firmicutes;c__Clostridia;o__Clostridia_UCG-014;f__;g__;s__
OTU_1799	0	0	0	0	0	0	0	0	0	0	0	0	0.000458033	0	0	0	0	0	0	0	k__Bacteria;p__Proteobacteria;c__Gammaproteobacteria
OTU_1800	0	0	0	0	0	0	0	0	0	0	0	0	0	0	0	0	0	0	0	0	k__Bacteria;p__unidentified_Bacteria;c__Thermoleophilia;o__Gaiellales;f__unidentified_Gaiellales;g__unidentified_Gaiellales;s__bacterium_Ellin6517
OTU_1801	0	0	0	0	0	0	0	0	0	0	0	0	0	0	0	0	0	0	0	0	k__Bacteria;p__Acidobacteriota;c__Subgroup_18;o__;f__;g__;s__
OTU_1802	0	0	0	0	0	0	0	0	0	0	0	0	0	0	0	0	0	0	0	0	k__Bacteria
OTU_1803	0	0	0	0	0	0	0	7.63388e-05	0	0.000114508	3.81694e-05	0.000305355	0	0	0	0	0	0	0	0	k__Bacteria;p__Acidobacteriota;c__Blastocatellia;o__Pyrinomonadales;f__Pyrinomonadaceae;g__RB41;s__
OTU_1804	0	0	0	0	0	0	0	0	0	0	0	0	0	0	0	0	0	0	0	0	k__Bacteria;p__unidentified_Bacteria;c__Saccharimonadia;o__Saccharimonadales;f__WWH38;g__;s__
OTU_1805	0	0	0	0	0	0	0	0	0	0	0	0	0	0	0	0	0	0.000152678	0	0	k__Bacteria;p__Proteobacteria;c__Gammaproteobacteria;o__Pasteurellales;f__Pasteurellaceae;g__Actinobacillus
OTU_1806	0	0	0	0	0	0	0	0	0	0	0	0.000190847	0	0	0	0	0	0	0	0	k__Bacteria;p__Acidobacteriota;c__Blastocatellia;o__Pyrinomonadales;f__Pyrinomonadaceae;g__RB41;s__
OTU_1807	0	0	0	0	0	0	0	0	0	0	0	0	0	0	0	0	0	0	0	0	k__Bacteria;p__Acidobacteriota;c__Holophagae;o__Subgroup_7;f__;g__;s__
OTU_1808	7.63388e-05	0	0.000190847	0.000305355	0	7.63388e-05	0.000152678	0	0	0	0	0	7.63388e-05	0.000114508	0	7.63388e-05	0	0	0.000305355	0	k__Bacteria;p__Firmicutes;c__Clostridia;o__Oscillospirales;f__Oscillospiraceae;g__NK4A214_group;s__
OTU_1809	0	0	0	0	0	0	0	0	0	0	0	0	0.000152678	0	0	0	0	0	0	0	k__Bacteria;p__unidentified_Bacteria;c__Thermodesulfovibrionia;o__;f__;g__;s__
OTU_1810	0	0	0	0	0	0	0	0	0	0	0	0	0	0	0	0	0	3.81694e-05	0	3.81694e-05	k__Bacteria;p__Bacteroidota;c__Bacteroidia;o__Bacteroidales;f__Muribaculaceae;g__CAG-873;s__
OTU_1811	0	0	0	0	0	0	0	0	0	0	0	0	0	0	0	0	0	0	0	3.81694e-05	k__Bacteria;p__Firmicutes;c__Clostridia;o__unidentified_Clostridia;f__Ruminococcaceae;g__;s__
OTU_1812	0	0	0	0	0	7.63388e-05	0	0	0	0	0	0	0	0	0	0	0	0	0	0	k__Bacteria;p__DTB120;c__;o__;f__;g__;s__
OTU_1813	0	0	0	0	0	0	0	0	0	0	0	0	0	0	0	0	0	0	0	0	k__Bacteria;p__Acidobacteriota;c__Blastocatellia;o__11-24;f__;g__;s__
OTU_1814	0	0	0	0	0	0	0	0	0	0	0	0	0	0	0	0	0	0	0	0	k__Bacteria;p__unidentified_Bacteria;c__Saccharimonadia;o__Saccharimonadales
OTU_1815	0	0	0	0	0	0	0	0	0	0	0	0	0	0	0	0	0	0	0	0	k__Bacteria;p__Bacteroidota;c__Bacteroidia;o__Bacteroidales;f__Bacteroidaceae;g__Bacteroides;s__Prevotella_heparinolytica
OTU_1816	0	0	0	0	0	3.81694e-05	0	0	0	0	0	0	0.000229016	0	0	0	0	0	0	0	k__Bacteria;p__Acidobacteriota;c__Holophagae;o__Subgroup_7;f__;g__;s__
OTU_1817	0	0	0	0	0	0	0	0	0	0	0	0	0	0	0	0	0	0	0	0	k__Bacteria
OTU_1818	0	0	0	0	3.81694e-05	0	0	3.81694e-05	0	3.81694e-05	0	0.000152678	3.81694e-05	0	0	0	0	0	0	0	k__Bacteria;p__Actinobacteriota;c__Actinobacteria;o__Pseudonocardiales;f__Pseudonocardiaceae;g__Pseudonocardia;s__
OTU_1819	0	0	0	0	0	3.81694e-05	0	0.000114508	7.63388e-05	0.000152678	0.000114508	0	7.63388e-05	0	0	0	0	0	0	7.63388e-05	k__Bacteria;p__Chloroflexi;c__KD4-96;o__;f__;g__;s__
OTU_1820	0	0	0	0	0	0	0	0	0	0	0	0	0	0	0	0	0	0	0	0.000114508	k__Bacteria;p__Firmicutes;c__Bacilli;o__Paenibacillales;f__Paenibacillaceae;g__Paenibacillus;s__
OTU_1821	0	0	0	0	0	0	0	0	0	0	0	0	0	0	0	0	0	0	0	0	Unknown
OTU_1822	0	0	0	0	0	0	0	7.63388e-05	0	3.81694e-05	0	0	0	0	0	0	0	0	0	0	k__Bacteria;p__Acidobacteriota;c__Acidobacteriae
OTU_1823	0	0	0	0.000152678	0	3.81694e-05	0	0	0	0	0	0	3.81694e-05	0	0	0	0	0	0	0	k__Bacteria;p__Firmicutes;c__Clostridia;o__Lachnospirales;f__Lachnospiraceae;g__Lachnospiraceae_UCG-010;s__
OTU_1824	0	0	0	0	0	0.000114508	0	0	0	0	0	0	0	0	0	0	0	0	0	0	k__Bacteria;p__Proteobacteria;c__Gammaproteobacteria;o__Burkholderiales;f__Methylophilaceae;g__MM2;s__
OTU_1825	0	0	0	0	0	0	0	0	0	0	0	0	0	0	0	0	0	0	0	0	k__Bacteria;p__Planctomycetota;c__Pla4_lineage;o__;f__;g__;s__
OTU_1826	0	0	0	0	0	0	0	0	7.63388e-05	0	0.000114508	7.63388e-05	0	0	0	0	0	0	0	0	k__Bacteria;p__Proteobacteria;c__Gammaproteobacteria;o__unidentified_Gammaproteobacteria;f__unidentified_Gammaproteobacteria;g__Acidibacter;s__
OTU_1827	0	0	0	0	0	0	0	0	0	0	0	0	0	0	0	0	0	0	0	0	k__Bacteria
OTU_1828	0	0	0	0	0	0	0	0	0	0	0	0	0	0	0	0	0	0	0	3.81694e-05	k__Bacteria;p__Acidobacteriota;c__Holophagae;o__Subgroup_7;f__;g__;s__
OTU_1829	0	0	0	0	0	0	0	0	0	0	0	0	0	0	0	0	0	0	0	0	k__Bacteria;p__Desulfobacterota;c__Desulfuromonadia;o__Sva1033;f__;g__;s__
OTU_1830	0	0	0	0	0	0	0	0	0	0	0	0	0.000114508	0	0	0	0	0	0	0	k__Bacteria;p__Desulfobacterota;c__Desulfuromonadia;o__Geobacterales;f__Geobacteraceae
OTU_1831	0	0	0	0	0	0	0	0	0	0	0	0	0	0	0	0	0	0	0	0	k__Bacteria;p__Bdellovibrionota;c__Bdellovibrionia;o__Bdellovibrionales;f__Bdellovibrionaceae;g__Bdellovibrio;s__
OTU_1832	0	0	0	0	0	0	0	0	0	0	0	0	0	0	0	0	0	0	0	0	k__Bacteria;p__Acidobacteriota;c__Holophagae;o__Subgroup_7;f__;g__;s__
OTU_1833	7.63388e-05	0	0	0	0	0	3.81694e-05	0	0	7.63388e-05	0	0	3.81694e-05	0	0	0	0	0	0	0	k__Bacteria;p__Firmicutes;c__Clostridia;o__Lachnospirales;f__Lachnospiraceae;g__Roseburia;s__
OTU_1834	0	0	0	0	0.000839727	0	0	0	0	0	0	0.000687049	0	0	0	0	0	0.000916065	0	0.000419863	k__Bacteria;p__Firmicutes;c__Clostridia;o__Oscillospirales;f__[Eubacterium]_coprostanoligenes_group;g__unidentified_[Eubacterium]_coprostanoligenes_group;s__Eubacterium_coprostanoligenes
OTU_1835	0	0	0	0	0.000190847	0	0	0	0	0	0	0	0	0	0	0	0	0	0	0	k__Bacteria
OTU_1836	0	0	0	0	0	7.63388e-05	0	0	0	0	0	0	0.000152678	0	0	0	0	0	0	0	k__Bacteria;p__Proteobacteria;c__Gammaproteobacteria;o__PLTA13;f__;g__;s__
OTU_1837	0	0	0	0	0	0	0	0	0	0	0	0	0.000152678	0	0	0	0	0	0	0	k__Bacteria;p__Acidobacteriota;c__Acidobacteriae;o__unidentified_Acidobacteriae;f__unidentified_Acidobacteriae;g__Paludibaculum;s__
OTU_1838	0	0	0	0	0	0	0	0	0	0	0	0	3.81694e-05	0	0	0	0	0	0	0	k__Bacteria;p__unidentified_Bacteria;c__Bacteroidia;o__Cytophagales;f__Microscillaceae;g__;s__
OTU_1839	0	0	0	0	0	0	0	0	0	0	0	0	0	0	0	0	0	0	0	0	k__Bacteria
OTU_1840	0	0	0	0	0	0.000305355	0	0	0	0	0	0	7.63388e-05	0	0	0	0	0	0	0	k__Bacteria
OTU_1841	0	0	0	0	0	0	0	0	0	0	0	0	0	0	0	0	0	0	0	0	k__Bacteria;p__Firmicutes;c__Clostridia;o__Peptostreptococcales-Tissierellales;f__Anaerovoracaceae;g__[Eubacterium]_saphenum_group;s__
OTU_1842	0	0	0	0	0	0	0	0	0	0	0	0	0	3.81694e-05	0	0	0	0	0	0	k__Bacteria;p__Firmicutes;c__Bacilli;o__Lactobacillales;f__Aerococcaceae;g__Ignavigranum;s__
OTU_1843	0	0	0	0	0	0	0	0	0	0	0	0	7.63388e-05	0	0	0	0	0	0	0	k__Bacteria;p__Firmicutes;c__Clostridia;o__Clostridiales;f__Clostridiaceae;g__Clostridium_sensu_stricto_13
OTU_1844	0	0	0	7.63388e-05	3.81694e-05	0	0	0	0	0	0	0	3.81694e-05	0	0	0	0	0	0	0	k__Bacteria;p__Firmicutes;c__Clostridia;o__Lachnospirales;f__Lachnospiraceae
OTU_1845	0	7.63388e-05	0	0	0	0	0	0	0	0	0	0	3.81694e-05	0	0	0	0	0	3.81694e-05	0	k__Bacteria;p__Proteobacteria;c__Gammaproteobacteria;o__Pseudomonadales;f__Pseudomonadaceae
OTU_1846	0	0	0	0	0	0	0	0	3.81694e-05	0	7.63388e-05	0	0	0	0	0	0	0	0	0	k__Bacteria;p__unidentified_Bacteria;c__Anaerolineae;o__Anaerolineales;f__Anaerolineaceae;g__;s__
OTU_1847	0	0	0	0	0	0	0	0	0	0	0	0	0	0	0	0	0	0	0	0	k__Bacteria;p__Proteobacteria;c__Gammaproteobacteria;o__Burkholderiales;f__A21b;g__;s__
OTU_1848	0	0	0	0	0	0	0	0	0	0	0	0	0	0	0	0	0	0	0	0	k__Bacteria;p__Firmicutes;c__Bacilli;o__RF39;f__;g__;s__
OTU_1849	0	0	0	0	0	0	0	3.81694e-05	0	0	0	0	0	0	0	0	0	0	0	0	k__Bacteria;p__Actinobacteriota;c__Actinobacteria;o__Propionibacteriales;f__Nocardioidaceae;g__Nocardioides
OTU_1850	0	0	0	0	0	0	0	0	0	0	0	0	0	0	0	0	0	0	0	0	k__Bacteria;p__Spirochaetota;c__Spirochaetia;o__Spirochaetales;f__Spirochaetaceae;g__Treponema;s__Treponema_sp_I:Q:AT20
OTU_1851	0	0	0	0	0	0	0	0	0	0	0	0	0.000152678	0	0	0	0	0	0	7.63388e-05	k__Bacteria;p__Proteobacteria;c__Alphaproteobacteria;o__Rhizobiales;f__Devosiaceae;g__Devosia;s__Devosia_riboflavina
OTU_1852	7.63388e-05	0	0	0	3.81694e-05	0	0	0	0	0	0	0	0	0	0	0	0	0	3.81694e-05	0	k__Bacteria;p__Firmicutes;c__Clostridia;o__Lachnospirales;f__Lachnospiraceae
OTU_1853	0	0	0	0	0	0	0	0	7.63388e-05	0	0	0	3.81694e-05	0	0	0	0	0	0	0	k__Bacteria;p__Acidobacteriota;c__Acidobacteriae;o__Bryobacterales;f__Bryobacteraceae;g__Bryobacter;s__
OTU_1854	0	0	0	0	0	0	0	0	0	0	0	0	0	0	0	0	0	0	0	0	k__Bacteria;p__unidentified_Bacteria;c__Acidobacteriae;o__Acidobacteriales;f__;g__;s__
OTU_1855	0	0	0	0	0	0	0	0	0	0	0	0	0	0	0	0	0	0	0	0	k__Bacteria;p__unidentified_Bacteria;c__Alphaproteobacteria
OTU_1856	0	0	0	0	0	0	0	3.81694e-05	0	0	0	0	0	0	0	0	0	0	0	3.81694e-05	k__Bacteria;p__Acidobacteriota;c__Acidobacteriae;o__Subgroup_2;f__;g__;s__
OTU_1857	0	0	0	0	0	0	0	0	0	0	0	0	0	0	0	0	0	0	0	0	k__Bacteria;p__Proteobacteria;c__Gammaproteobacteria;o__Pseudomonadales;f__Moraxellaceae;g__Acinetobacter;s__Acinetobacter_sp_SWBY1
OTU_1858	0	0	0	0	0	0	0	0	0	0	0	0	0	0	0	0	0	0	0	0	k__Bacteria;p__Actinobacteriota;c__Acidimicrobiia;o__IMCC26256;f__;g__;s__
OTU_1859	0	0	0	0	0	0	0	0	0	0	0	0	0	0	0	0	0	0	0	0	k__Bacteria;p__Acidobacteriota;c__Thermoanaerobaculia;o__Thermoanaerobaculales;f__Thermoanaerobaculaceae;g__Subgroup_10
OTU_1860	0	0	0	0	0	0	0	0	0	0	0	0	0	0	0	0	0	0	0	0	k__Bacteria;p__Myxococcota;c__Polyangia;o__Haliangiales;f__Haliangiaceae;g__Haliangium;s__Kofleria_flava
OTU_1861	0	0	0	0	0	0	0	0	0	0	0	0	0	0	0	0	0	0	0	0	k__Bacteria;p__Acidobacteriota;c__Acidobacteriae;o__Bryobacterales;f__Bryobacteraceae;g__Bryobacter;s__
OTU_1862	0	0	0	0	0	0.000229016	0	7.63388e-05	0	3.81694e-05	3.81694e-05	0	0.000381694	0	0	0	0	0	0	7.63388e-05	k__Bacteria;p__unidentified_Bacteria;c__unidentified_Bacteria;o__Gemmatimonadales;f__Gemmatimonadaceae
OTU_1863	0	0	0	0	0	0	0	0	0	0	0	0	0.000725219	0	0	0	0	0	0	7.63388e-05	k__Bacteria;p__Myxococcota;c__Polyangia;o__Nannocystales;f__Nannocystaceae
OTU_1864	0	0	0	0	0	0	0	0	0	0	0	0	0	0	0	0	0	0	0	0	k__Bacteria;p__Actinobacteriota;c__MB-A2-108;o__;f__;g__;s__
OTU_1865	0	0	0	0	0	0	0	0	0	3.81694e-05	0	0	0	0	0	0	0	0	0	0	k__Bacteria;p__unidentified_Bacteria;c__unidentified_Bacteria;o__Gemmatimonadales;f__Gemmatimonadaceae;g__;s__
OTU_1866	0	0	0	0	0	0	0	0	0	0	0	0	0	0	0	0	0	0	0	0	k__Bacteria;p__Acidobacteriota;c__Subgroup_22;o__;f__;g__;s__
OTU_1867	0	0	0	0	0	0	0	0	0	0	0	0	0	0	0	0	0	0	0	0	k__Bacteria;p__Firmicutes;c__Clostridia;o__Oscillospirales;f__Oscillospiraceae;g__Colidextribacter;s__
OTU_1868	0	0	0	0	0	0	0	3.81694e-05	3.81694e-05	0	0	0	0	0	0	0	0	0	0	0	k__Bacteria;p__Bacteroidota;c__Bacteroidia;o__Sphingobacteriales;f__AKYH767;g__;s__
OTU_1869	0	0	0	0	0	0	0	0	0	0	0	0	0	0	0	0	0	0	0	0	k__Bacteria
OTU_1870	0	0	0	0	0	0	0	0	0	0	0	0	0.000305355	0	0	0	0	0	0	0	k__Bacteria
OTU_1871	0	0	0	0	0	0	0	0	0	3.81694e-05	0	0	0	0	0	0	0	0	0	0	k__Bacteria;p__Myxococcota;c__Myxococcia;o__Myxococcales;f__Myxococcaceae;g__Cystobacter;s__Cystobacter_fuscus
OTU_1872	0	0	0	7.63388e-05	0	0	0	0	0	0	0	0	0	0	0	0	0	0	3.81694e-05	0	k__Bacteria;p__unidentified_Bacteria;c__Clostridia;o__Peptococcales;f__Peptococcaceae;g__;s__
OTU_1873	0	0	0	0	0	0	0	0	0	0	0	0	0	0	0	0	0	0	0	0	k__Bacteria;p__Firmicutes;c__Clostridia;o__Lachnospirales;f__Lachnospiraceae;g__[Ruminococcus]_gauvreauii_group;s__
OTU_1874	0	0	0	0	0	0	0	7.63388e-05	7.63388e-05	3.81694e-05	7.63388e-05	0	0	0	0	0	0	0	0	0	k__Bacteria;p__unidentified_Bacteria;c__Anaerolineae;o__Anaerolineales;f__Anaerolineaceae;g__;s__
OTU_1875	0	0	0	0	0	0	0	0	0	0	0	0	7.63388e-05	0	0	0	0.000152678	7.63388e-05	0	3.81694e-05	k__Bacteria;p__Firmicutes;c__Clostridia;o__Lachnospirales;f__Lachnospiraceae
OTU_1876	0	0	0	0	0	0	0	0	0	0	0	0	0	0	0	0	0	0	0	0	k__Bacteria;p__Gemmatimonadota;c__S0134_terrestrial_group;o__;f__;g__;s__
OTU_1877	0	0	0	0	0	0	0	0	0	0	0	0	0	0	0	0	0	0	0	3.81694e-05	k__Bacteria
OTU_1878	0	0	0	0	0	0	0	0	0	0	3.81694e-05	0	0	0	0	0	3.81694e-05	0	0	0	k__Bacteria;p__Firmicutes;c__Bacilli;o__Lactobacillales;f__Carnobacteriaceae;g__Jeotgalibaca;s__
OTU_1879	0	0	0	0	0	0	0	0	0	0	0	0	0	0	0	0	0	0	0	0	k__Bacteria;p__Acidobacteriota;c__Holophagae;o__Holophagales;f__Holophagaceae
OTU_1880	0	0	0	0	0	0	0	3.81694e-05	3.81694e-05	0	0	7.63388e-05	0	0	0	0	0	0	0	0	k__Bacteria;p__Acidobacteriota;c__Vicinamibacteria;o__Vicinamibacterales;f__Vicinamibacteraceae;g__;s__
OTU_1881	0	0	0	0	0	0	0	0	0	0	0	0	7.63388e-05	0	0	0	0	0	0	0	k__Bacteria;p__Bacteroidota;c__Bacteroidia;o__Sphingobacteriales;f__Lentimicrobiaceae;g__;s__
OTU_1882	0	0	0	0	0	0	0	0	0	3.81694e-05	0	0	0	0	0	0	0	0	0	0	k__Bacteria;p__Acidobacteriota;c__Holophagae;o__Subgroup_7;f__;g__;s__
OTU_1883	0	0	0	0	0	0	0	0	3.81694e-05	7.63388e-05	3.81694e-05	0	0	0	0	0	0	0	0	0	k__Bacteria;p__unidentified_Bacteria;c__Alphaproteobacteria;o__;f__;g__;s__
OTU_1884	0	0	0	0	0	0	0	0	0	0	0	0	0	0	0	0	0	0	0	0	k__Bacteria
OTU_1885	0	0	0	0	0	0	0	7.63388e-05	0	3.81694e-05	0	0	0	0	0	0	0	0	0	0	k__Bacteria;p__unidentified_Bacteria;c__Acidobacteriae;o__Acidobacteriales
OTU_1886	0	0	0	0	0	0	0	0	0	0	0	0	0	0	0	0	0	0	0	0	k__Bacteria;p__Gemmatimonadetes;c__unidentified_Gemmatimonadetes;o__Gemmatimonadales;f__Gemmatimonadaceae;g__Gemmatimonas;s__
OTU_1887	0	0	0	0	0	0	0	0	0	0	0	0	0.000114508	0	0	0	0	0	0	0	k__Bacteria;p__unidentified_Bacteria;c__Gammaproteobacteria;o__Xanthomonadales
OTU_1888	0	0	0	0	0	0	0	0	0	0	0	0	0	0	0	0	0	0	0	0	k__Bacteria;p__Bacteroidota;c__Bacteroidia;o__Chitinophagales;f__Chitinophagaceae;g__Edaphobaculum;s__
OTU_1889	0	0	0	0	0	0	0	0	0	0	0	0	0	0	0	0	0	0	0	0	k__Bacteria;p__Cyanobacteria;c__Cyanobacteriia;o__Chloroplast;f__unidentified_Chloroplast;g__unidentified_Chloroplast;s__Klebsormidium_nitens
OTU_1890	0.000305355	0.000229016	0.000114508	0	0	0.000229016	7.63388e-05	0	0	0	0	3.81694e-05	0.00061071	0.000229016	0.000267186	0	3.81694e-05	3.81694e-05	7.63388e-05	0.000152678	k__Bacteria;p__Firmicutes;c__Clostridia;o__Lachnospirales;f__Lachnospiraceae
OTU_1891	0	0	0	0	0	0	0	0	0	0	0	0	0	0	0	0	0	0	0	0	k__Bacteria;p__Proteobacteria;c__Gammaproteobacteria;o__Xanthomonadales;f__Xanthomonadaceae;g__Thermomonas;s__
OTU_1892	0	0	0	0	0	0.000152678	0	0	0	0	0	0	0	0	0	0	0	0	0	0	k__Bacteria;p__Acidobacteriota;c__Subgroup_22;o__;f__;g__;s__
OTU_1893	0	0	0	0	0	0	0	0	0	0	0	0	0	0	0	0	0	0	0	0	k__Bacteria;p__Proteobacteria;c__Gammaproteobacteria;o__Vibrionales;f__Vibrionaceae;g__Vibrio;s__Vibrio_metschnikovii
OTU_1894	0	0	0	0	0	0	0	0	0	0	0	0	0	0	0	0	0	0	0	0	k__Bacteria;p__unidentified_Bacteria;c__unidentified_Bacteria;o__unidentified_Bacteria;f__unidentified_Bacteria;g__unidentified_Bacteria;s__delta_proteobacterium_WX81
OTU_1895	0	0	0	0	0	0	0	0	0	0	0	0	0	0	0	0	0	0	0	0	k__Bacteria;p__Actinobacteriota;c__Actinobacteria;o__Micrococcales;f__Jonesiaceae;g__Jonesia;s__Jonesia_denitrificans
OTU_1896	0	0	0	0	0	3.81694e-05	0	0	0	0	0	0	0	0	0	0	0	0	0	0	k__Bacteria;p__Firmicutes;c__Clostridia;o__Clostridiales;f__Clostridiaceae;g__Clostridium_sensu_stricto_12
OTU_1897	0	0	0	3.81694e-05	0	0	0	0	0	0	0	0	0	0	0	0	0	0	0	0	k__Bacteria;p__Firmicutes;c__Clostridia;o__Oscillospirales;f__unidentified_Oscillospirales;g__Hydrogenoanaerobacterium
OTU_1898	0	0	0	0	0	0	0	0	0	0	0	0	0	0	0	0	0	0	0	0	k__Bacteria
OTU_1899	0	0	0	0	0	0	0	0	0	0	0	0	0	0	0	0	0	0	0	0	k__Bacteria;p__Firmicutes;c__Bacilli;o__Staphylococcales;f__Staphylococcaceae;g__Salinicoccus;s__Salinicoccus_alkaliphilus
OTU_1900	0	0	0	0	0	0	0	0	0	0	0	0	0	0	0	0	0	0	0	0	k__Bacteria;p__Actinobacteriota;c__Actinobacteria;o__Actinomycetales;f__Actinomycetaceae;g__F0332;s__
OTU_1901	0	0	0	0	0	3.81694e-05	0	0	0	0	0	7.63388e-05	0	0	0	0	0	0	0	0	k__Bacteria;p__Nitrospirota;c__Nitrospira;o__Nitrospirales;f__Nitrospiraceae;g__unidentified_Nitrospiraceae
OTU_1902	0	0	0	0	0	0	0	0	0	0	0	0	0	0	0	0	0	0	0	0	k__Bacteria;p__Firmicutes;c__Bacilli;o__Erysipelotrichales;f__Erysipelotrichaceae;g__Faecalitalea;s__Absiella_argi
OTU_1903	0	0	0	0	0	0	0	3.81694e-05	0	3.81694e-05	3.81694e-05	0	0	0	0	0	0	0	0	0	k__Bacteria;p__unidentified_Bacteria;c__Bacteroidia;o__Chitinophagales;f__Saprospiraceae;g__unidentified_Saprospiraceae;s__bacterium_enrichment_culture_clone_SRAO_34
OTU_1904	0	0	0	0	0	0	0	3.81694e-05	3.81694e-05	3.81694e-05	0.000114508	0	0	0	0	0	0	0	0	0	k__Bacteria;p__Gemmatimonadota;c__BD2-11_terrestrial_group;o__;f__;g__;s__
OTU_1905	0	0	0	0	0	0	0	0	0	0	0	0	0	0	0	0	0	0	0	0	k__Bacteria;p__Kryptonia;c__unidentified_Kryptonia;o__Kryptoniales;f__BSV26;g__;s__
OTU_1906	0	0	0	0	0	0	0	0	0	0	0	0	0	0	0	0	0	0	0	7.63388e-05	k__Bacteria;p__unidentified_Bacteria;c__Desulfobacteria;o__Desulfobacterales;f__Desulfosarcinaceae;g__;s__
OTU_1907	0	0	0	0	0	0	0	0	0	0	0	0	3.81694e-05	0	0	0	0	0	0	0	k__Bacteria;p__Proteobacteria;c__Gammaproteobacteria;o__Diplorickettsiales;f__Diplorickettsiaceae;g__Aquicella;s__
OTU_1908	0	0	0	0	0	0	0	0	0	0	0	0	0	0	0	0	0	0	0	0	k__Bacteria;p__unidentified_Bacteria;c__Saccharimonadia;o__Saccharimonadales;f__;g__;s__
OTU_1909	0	0	0	0	0	0	0	0	0	0	0	0	0	0	0	0	0	0	0	0	k__Bacteria;p__Bacteroidota;c__Bacteroidia;o__Chitinophagales;f__Chitinophagaceae;g__Pseudoflavitalea;s__Pseudobacter_ginsenosidimutans
OTU_1910	0	0	0	0	0	0	0	0	0	0	0	0	0.000190847	0	0	0	0	0	0	0	k__Bacteria;p__Deferrisomatota;c__Defferrisomatia;o__Defferrisomatales;f__Defferrisomataceae;g__Deferrisoma;s__
OTU_1911	0	0	0	0	0	0	0	0	0	0	0	0	7.63388e-05	0	0	0	0	0	0	0	k__Bacteria;p__Myxococcota;c__bacteriap25;o__;f__;g__;s__
OTU_1912	0	0	0	0	0	0	0	3.81694e-05	3.81694e-05	0	0	0	3.81694e-05	0	0	0	0	0	0	0	k__Bacteria;p__Proteobacteria;c__Alphaproteobacteria;o__Rhizobiales;f__Rhizobiaceae;g__Ensifer;s__Ensifer_meliloti
OTU_1913	0	0	0	0	0	3.81694e-05	0	0	0	0	0	0	0	0	0	0	0	0	0	0	k__Bacteria;p__unidentified_Bacteria;c__Vicinamibacteria;o__Vicinamibacterales;f__;g__;s__
OTU_1914	0	0	0	0	0	0	0	0	0	0	0	0	0	0	0	0	0	0	0	0	k__Bacteria;p__Proteobacteria;c__Alphaproteobacteria;o__Rhizobiales;f__Kaistiaceae;g__Kaistia;s__
OTU_1915	0	0	0	0	0	0	0	0	0	0	0	0	0	0	0	0	0	0	0	0	k__Bacteria;p__Actinobacteriota;c__Actinobacteria;o__Micrococcales;f__AKAU3644;g__;s__
OTU_1916	0	0	0	0	0	0	0	0	0	0	0	0	0	0	0	0	0	0	0	0	k__Bacteria;p__Latescibacterota;c__;o__;f__;g__;s__
OTU_1917	0	0	0	0	0	0	0	0	0	0	0	0	0	0	0	0	0	0	0	0	k__Bacteria;p__Gemmatimonadota;c__Longimicrobia;o__Longimicrobiales;f__Longimicrobiaceae;g__YC-ZSS-LKJ147;s__
OTU_1918	0	0	0	0	0	0.000381694	0	0	0	0	0	0	0	0	0	0	0	0	0	0	k__Bacteria;p__Acidobacteriota;c__Subgroup_18;o__;f__;g__;s__
OTU_1919	0	0	0	0	0	0	0	0	0	0	0	0	0	0	0	0	0	0	0	0	k__Bacteria;p__Firmicutes;c__Clostridia;o__Oscillospirales;f__UCG-010;g__;s__
OTU_1920	0	0	0	0	0	0	0	0	0	0	0	0	0	0	0	0	0	0	0	0	k__Bacteria;p__Actinobacteriota;c__Thermoleophilia;o__Solirubrobacterales;f__67-14;g__;s__
OTU_1921	0	0	0	0	0	0	0	0	0	0	0	0	0	0	0	0	0	0	0	0	k__Bacteria;p__unidentified_Bacteria;c__Bacilli;o__Erysipelotrichales;f__Erysipelotrichaceae;g__;s__
OTU_1922	0	0	3.81694e-05	0	0	0.000267186	0	0	0	0	0	0	0	0	0	0	0	0	0	0	k__Bacteria;p__unidentified_Bacteria;c__Thermodesulfovibrionia;o__;f__;g__;s__
OTU_1923	0	0	0	0	0	0	0	0	0	0	0	0	3.81694e-05	0	3.81694e-05	0	0	0	0	0	k__Bacteria
OTU_1924	0	0	0	0	0	0	0	0	0	0	0	0	0	0	0	0	0	0	0	0	k__Bacteria;p__Bacteroidota;c__Bacteroidia;o__Bacteroidales;f__Prevotellaceae
OTU_1925	0	0	0	0	0	0	0	0	0	0	0	0	0	0	0	0	0	0	0	0	k__Bacteria
OTU_1926	0	0	0	0	0	7.63388e-05	0	0	0	0	0	0	0	0	0	0	7.63388e-05	0	0	0	k__Bacteria;p__Bacteroidota;c__Bacteroidia;o__Bacteroidales;f__Muribaculaceae;g__;s__
OTU_1927	0	0	0	0	0	0	0	0	0	0	0	0	0	0	0	0	0	0	0	0	k__Bacteria;p__Firmicutes;c__Bacilli;o__Lactobacillales;f__Carnobacteriaceae;g__Lacticigenium;s__
OTU_1928	0	0	0	0	0	0	0	0	0	0	0.000114508	0	0	0	0	0	0	0	0	0	k__Bacteria;p__Bdellovibrionota;c__Bdellovibrionia;o__Bdellovibrionales;f__Bdellovibrionaceae;g__Bdellovibrio;s__
OTU_1929	0	0	0	0	0	0	0	0	0	0	0	0	0	0	0	0	0	0	0	0	k__Bacteria;p__Latescibacteria;c__unidentified_Latescibacteria;o__Latescibacterales;f__Latescibacteraceae;g__;s__
OTU_1930	0	0	0	0	0	0	0	0	3.81694e-05	0	0	0	3.81694e-05	0	0	0	0	0	0	0	k__Bacteria;p__unidentified_Bacteria;c__Thermoleophilia;o__Gaiellales;f__;g__;s__
OTU_1931	0	0	0	0	0	0	0	0	3.81694e-05	3.81694e-05	0.000114508	0	0	0	0	0	0	0	0	0	k__Bacteria;p__unidentified_Bacteria;c__Thermoleophilia;o__Gaiellales;f__;g__;s__
OTU_1932	0	0	0	0	0	0	0	0	0	0	0	0	0	0	0	0	0	0	0	0	k__Bacteria;p__Myxococcota;c__Polyangia;o__Polyangiales;f__Sandaracinaceae;g__Sandaracinus;s__
OTU_1933	0	0	0	0	0	0	0	0	0	0	0	0	7.63388e-05	0	0	0	0	0	0	0	k__Bacteria;p__Proteobacteria;c__Gammaproteobacteria;o__Cellvibrionales;f__Cellvibrionaceae;g__Cellvibrio
OTU_1934	0	0	0	0	0	0	0	0	0	0	0	0	0	0	0	0	0	0	0	3.81694e-05	k__Bacteria;p__Methylomirabilota;c__Methylomirabilia;o__Rokubacteriales;f__WX65;g__;s__
OTU_1935	0	0	0	0	0	0	0	0	0	0	0	0	0	0	0	0	0	0	0	0	k__Bacteria
OTU_1936	0	0	0	0	0	0	0	0	0	0	0	0	0	0	0	0	0	0	0	0	k__Bacteria;p__Proteobacteria;c__Alphaproteobacteria;o__Rhodobacterales;f__Rhodobacteraceae;g__Rubellimicrobium;s__
OTU_1937	0	0	0	0	0	0	0	0	0	0	0	0	0	0	0	0	0	0	0	0	k__Bacteria;p__unidentified_Bacteria;c__Chloroflexia;o__Chloroflexales;f__Roseiflexaceae;g__;s__
OTU_1938	0	0	0	0	0	0	0	0	0	0	0	0	0	0	0	0	0	0	0	0	k__Bacteria;p__Firmicutes;c__Bacilli;o__Lactobacillales;f__Streptococcaceae;g__Lactococcus;s__Lactococcus_raffinolactis
OTU_1939	0	0	0	0	0	0	0	0	0	0	0	0	0	0	0	0	0	0	0	0	k__Bacteria;p__Chloroflexi;c__Dehalococcoidia
OTU_1940	0	7.63388e-05	0	0	0	0	0	0	0	0	7.63388e-05	0	0	3.81694e-05	7.63388e-05	0	0	3.81694e-05	0	0	k__Bacteria;p__Firmicutes;c__Bacilli;o__Erysipelotrichales;f__Erysipelotrichaceae;g__Dubosiella;s__
OTU_1941	0	0	0	0	0	0	0	0	0	0	0	0	0.000152678	0	0	0	0	0	0	0	k__Bacteria
OTU_1942	0	0	0	0	0	0	0	0	0	0	0	0	0	0	0	0	0	0	0	0	k__Bacteria;p__Proteobacteria;c__Gammaproteobacteria;o__Xanthomonadales;f__Xanthomonadaceae;g__Pseudoxanthomonas;s__
OTU_1943	0	0	0	0	0	0	0	0	0	0	0	0	0	0	0	0	0	0	0	0	k__Bacteria;p__Proteobacteria;c__Alphaproteobacteria;o__Rhizobiales;f__Rhizobiaceae;g__Allorhizobium-Neorhizobium-Pararhizobium-Rhizobium;s__Rhizobium_phaseoli
OTU_1944	0	0	0	0	0	0	0	0	0	0	0	0	0	0	0	0	0	0	0	0	k__Bacteria;p__Bacteroidota;c__Bacteroidia;o__Cytophagales;f__Microscillaceae;g__Flexibacter;s__
OTU_1945	0	0	0	0	0	0	0	0	0	0	0	0	0	0	0	0	0	0	0	0	k__Bacteria;p__Bacteroidota;c__Bacteroidia;o__Bacteroidales;f__Muribaculaceae;g__;s__
OTU_1946	0	0	0	0	0	0	0	0	0	3.81694e-05	0	0	0	0	0	0	0	0	0	0	k__Bacteria;p__Armatimonadota;c__Fimbriimonadia;o__Fimbriimonadales;f__Fimbriimonadaceae;g__;s__
OTU_1947	0	0	0	0	0	0	0	0	0	0	0	0	0	0	0	0	0	0	0	0	k__Bacteria;p__Bacteroidota;c__Bacteroidia;o__Bacteroidales;f__Rikenellaceae;g__Alistipes;s__
OTU_1948	0	0	0	0	0	0	0	0	0	0	0	0	0	0	0	0	0	0	0	0	k__Bacteria;p__Firmicutes;c__Bacilli;o__Alicyclobacillales;f__Alicyclobacillaceae;g__Tumebacillus;s__
OTU_1949	0	0	0	0	3.81694e-05	0	0	3.81694e-05	0	0	3.81694e-05	0	0	0	0	0	0	0	0	0	k__Bacteria
OTU_1950	0	0	0	0	0	0	0	0	0	0	0	0	0	0	0	0	0	0	0	0	k__Bacteria;p__Firmicutes;c__Clostridia;o__Lachnospirales;f__Lachnospiraceae;g__Syntrophococcus;s__
OTU_1951	0	0	0	0	0	0	0	0	0	0	0	0	0	0	0	0	0	0	0	0	k__Bacteria;p__Gemmatimonadetes;c__unidentified_Gemmatimonadetes;o__Gemmatimonadales;f__Gemmatimonadaceae;g__Gemmatimonas
OTU_1952	0	0	0	0	0	0	0	0	0	0	0	0	0	0	0	0	0.000496202	0	0	0	k__Bacteria;p__Bacteroidota;c__Bacteroidia;o__Bacteroidales;f__Marinifilaceae;g__Butyricimonas;s__
OTU_1953	0	0	0	0	3.81694e-05	0	0	0	0	0	0	0	0	0	0	0	0	0	0	7.63388e-05	k__Bacteria;p__Firmicutes;c__Clostridia;o__Oscillospirales;f__[Eubacterium]_coprostanoligenes_group;g__;s__
OTU_1954	0	0	0	0	0	0	0	0	0	0	0	0	0	0	0	0	0	0	0	0	k__Bacteria;p__Bacteroidota;c__Bacteroidia;o__Bacteroidales;f__Rikenellaceae;g__Rikenellaceae_RC9_gut_group;s__
OTU_1955	0	0	0	0	0	0	0	0	0	0	0	0	0	0	0	0	0	0	0	0	k__Bacteria
OTU_1956	0	0	0	0	0	0	0	0	0	0	0	0	0	0	0	0	0	0	0	0	k__Bacteria;p__Chloroflexi;c__Anaerolineae;o__;f__;g__;s__
OTU_1957	0	0	0	0	0	0	0	3.81694e-05	0	0	0	0	0	0	0	0	0	0	0	7.63388e-05	k__Bacteria;p__Acidobacteriota;c__Thermoanaerobaculia;o__Thermoanaerobaculales;f__Thermoanaerobaculaceae;g__Subgroup_10;s__
OTU_1958	0	0	0	0	0	0	0	0	0	0	0	0	7.63388e-05	0	0	0	0	0	0	0	k__Bacteria;p__Proteobacteria;c__Gammaproteobacteria;o__Burkholderiales;f__Comamonadaceae
OTU_1959	0	0	0	0	0	0	0	0	0	0	0	0	0	0	0	0	0	0	0	0	k__Bacteria
OTU_1960	0	0	0	0	0	0	0	0	0	0	0	0	0	0	0	0	0	0	0	0.000190847	k__Bacteria
OTU_1961	0	0	0	0	0	0	0	0	0	0	0	0	0	0	0	0	0	0	0	0	k__Bacteria;p__Bacteroidota;c__Bacteroidia;o__Sphingobacteriales;f__Sphingobacteriaceae;g__Pedobacter;s__
OTU_1962	0	0	0	0	0	0	0	0	0	0	0	0	0	0	0	0	0	0	0	0	k__Bacteria;p__unidentified_Bacteria;c__Saccharimonadia;o__Saccharimonadales
OTU_1963	0	0	0	0	0	0	0	0	0	0	0	0	0	0	0	0	0	0	0	0	k__Bacteria;p__Proteobacteria;c__Gammaproteobacteria;o__Burkholderiales;f__Nitrosomonadaceae;g__Nitrosomonas;s__Nitrosomonas_communis
OTU_1964	0	0	0	0	0	0	0	0	0	0	0	0	0	0	0	0	0	0	0	0	k__Bacteria;p__Bacteroidota;c__Bacteroidia;o__Chitinophagales;f__Chitinophagaceae;g__Niastella;s__
OTU_1965	0	0	0	0	0	0	0	0	0	0	0	0	0	0	0	0	0	0	0	0	k__Bacteria;p__unidentified_Bacteria;c__Chloroflexia;o__Chloroflexales;f__Roseiflexaceae;g__;s__
OTU_1966	0	0	0	0	0	0	0	0	0	0	0	0	0	0	0	0	7.63388e-05	0	0	0	k__Bacteria
OTU_1967	0.000114508	0	0	0	3.81694e-05	0	0	0	0	0	0	0	0	0	0	0	0	0	0	0	k__Bacteria;p__Firmicutes;c__Clostridia;o__Lachnospirales;f__Lachnospiraceae;g__Lachnospiraceae_NK4A136_group;s__
OTU_1968	0	0	0	0	0	0	0	0	0	0	0	0	0	0	0	0	0	0	0	0	k__Bacteria;p__unidentified_Bacteria;c__Saccharimonadia;o__Saccharimonadales;f__Saccharimonadaceae;g__TM7a;s__
OTU_1969	0	0	0	0	0	0	0	0	0	0	0	0	7.63388e-05	0	0	0	0	0	0	0	k__Bacteria
OTU_1970	0	0	0	0	0	0	0	0	0	0	0	0	0	0	0	0	0	0	0	0.000114508	k__Bacteria;p__Firmicutes;c__Clostridia;o__Clostridia_vadinBB60_group;f__;g__;s__
OTU_1971	0	0	0	0	0	0	0	0	0	0	0	0	0	0	0	0	0	0	0	0	k__Bacteria;p__Firmicutes;c__Clostridia;o__Clostridia_UCG-014;f__;g__;s__
OTU_1972	0	0	0	0	0	0	0	0	0	0	0	0	0.000343525	0	0	0	0	0	0	0	k__Bacteria
OTU_1973	0	0	0	0	0	0	0	0	0	0	0	0	0	0	0	0	0	0	0	0	k__Bacteria;p__unidentified_Bacteria;c__Alphaproteobacteria;o__Rhodospirillales;f__Magnetospiraceae;g__;s__
OTU_1974	0	0	0	0	0	0	0	0	0	0	0	0	0	0	0	0	0	0	0	0	k__Bacteria;p__Acidobacteriota;c__Acidobacteriae;o__Subgroup_15;f__;g__;s__
OTU_1975	0	0	0	0	0	0	0	0	0	0	0	0	7.63388e-05	0	0	0	0	0	0	0	k__Bacteria;p__Myxococcota;c__Polyangia;o__Polyangiales;f__Polyangiaceae;g__Pajaroellobacter;s__
OTU_1976	0	0	0	0	0	0	0	0	0	0	0	0	0	0	0	7.63388e-05	0	0	0	0	k__Bacteria;p__Firmicutes;c__Clostridia;o__Clostridia_vadinBB60_group;f__;g__;s__
OTU_1977	0	0	0	0	0	0	0	0	0	0	0	0	0	0	0	0	0	0	0	0	k__Bacteria;p__Proteobacteria;c__Gammaproteobacteria;o__Aeromonadales;f__Aeromonadaceae
OTU_1978	0	0	0	0	0	0.000267186	0	0	0	0	0	0	3.81694e-05	0	0	0	0	0	0	0	k__Bacteria;p__Bacteroidota;c__Bacteroidia;o__Bacteroidales;f__SB-5;g__;s__
OTU_1979	0	0	0	0	0	0	0	0	0	0	0	0	0	0	0	0	0	0	0	0	k__Bacteria;p__Firmicutes;c__Clostridia;o__Lachnospirales;f__Lachnospiraceae;g__Acetitomaculum;s__
OTU_1980	0	0	0	0	0	0	0	0	0	0	0	0	0.000381694	0	0	0	0	0	0	0	k__Bacteria;p__Desulfobacterota;c__Desulfobulbia;o__Desulfobulbales;f__Desulfocapsaceae
OTU_1981	0	0	0	0	0	0	0	0	0	0	0	0	0	0	0	0	0	0	0	0	k__Bacteria;p__Bacteroidota;c__Bacteroidia;o__Chitinophagales;f__Chitinophagaceae;g__Chitinophaga
OTU_1982	0	0	0	0	0	0	0	0	0	0	0	0	0	0	0	0	0	0	0	0	k__Bacteria;p__unidentified_Bacteria;c__Vicinamibacteria;o__Vicinamibacterales;f__;g__;s__
OTU_1983	0	0	0	0	0	0	0	0	0	0	0	0	0	0	0	0	0	0	0	0	k__Bacteria;p__unidentified_Bacteria;c__unidentified_Bacteria;o__Gemmatimonadales;f__Gemmatimonadaceae;g__;s__
OTU_1984	0	0	0	0	0	0.000152678	0	0	0	0	0	0	0	0	0	0	0	0	0	0	k__Bacteria;p__unidentified_Bacteria;c__Vicinamibacteria;o__Vicinamibacterales;f__;g__;s__
OTU_1985	0	0	0	0	0	0	0	0	3.81694e-05	0	0	0	0	0	0	0	0	0	0	0	k__Bacteria;p__Cyanobacteria;c__Vampirivibrionia;o__Obscuribacterales;f__Obscuribacteraceae;g__;s__
OTU_1986	0	0	0	0	0	0	0	0	0	0	0	0	0	0	0	0	0	0	0	0	k__Bacteria;p__Firmicutes;c__Clostridia;o__Peptostreptococcales-Tissierellales;f__Anaerovoracaceae;g__Family_XIII_UCG-001;s__
OTU_1987	0	0	0	0	0	0	0	0	0	0	0	0	0	0	0	0	0	0	0	3.81694e-05	k__Bacteria;p__Firmicutes;c__Clostridia;o__Clostridia_vadinBB60_group;f__unidentified_Clostridia_vadinBB60_group;g__unidentified_Clostridia_vadinBB60_group;s__Clostridiales_bacterium_feline_oral_taxon_148
OTU_1988	0	0	0	0	0	0	0	0	0	0	0	0	0	0	0	0	0	0	0	0	k__Bacteria;p__Kapabacteria;c__unidentified_Kapabacteria;o__Kapabacteriales;f__;g__;s__
OTU_1989	0	0	0	0	0	0	0	0	0	0	0	0	0	0	0	0	0	0	0	0	k__Bacteria;p__Bacteroidota;c__Bacteroidia;o__Bacteroidales;f__Prevotellaceae;g__Prevotella;s__Prevotella_pleuritidis
OTU_1990	0	0	0	0	0	0	0	0	0	0	0	0	0	0	0	0	0	0	0	0	k__Bacteria;p__Proteobacteria;c__Gammaproteobacteria;o__Burkholderiales;f__Rhodocyclaceae;g__Dechloromonas;s__
OTU_1991	0	0	0	0	0	0	3.81694e-05	0	0	0	0	0	0	0	0	0	0	0	0	0	k__Bacteria;p__Firmicutes;c__Clostridia;o__Oscillospirales;f__Ruminococcaceae;g__Ruminococcus;s__rumen_bacterium_NK4A78
OTU_1992	0	0	0	0	0	0	0	0	0	0	0	0	0	0	0	0	0	0	0	0	k__Bacteria;p__unidentified_Bacteria;c__Saccharimonadia;o__Saccharimonadales;f__Saccharimonadaceae;g__Candidatus_Saccharimonas;s__
OTU_1993	0	0	0	0	0	0	0	0	0	0	0	0	0	0	0	0	0	0	0	0	k__Bacteria;p__Firmicutes;c__Clostridia
OTU_1994	0	0	0	0	0	0	0	0	0	0	0	0	0	0	0	0	0	0	0	0	k__Bacteria
OTU_1995	0	0	0	0	0	0	0	0	0	0	0	0	0	0	0	0	0	0	0	0	k__Bacteria;p__Bacteroidota;c__Bacteroidia;o__Sphingobacteriales;f__Sphingobacteriaceae;g__Mucilaginibacter;s__Mucilaginibacter_sp
OTU_1996	0	0	0	0	0	0	0	0	0	0	0	0	0	0	0	0	0	0	0	0	k__Bacteria;p__Verrucomicrobiota;c__Verrucomicrobiae;o__Pedosphaerales;f__Pedosphaeraceae
OTU_1997	0	0	0	0	0	0	0	0	0	0	0	0	3.81694e-05	0	0	0	0	0	0	0	k__Bacteria;p__Chloroflexi;c__Anaerolineae;o__SBR1031;f__A4b;g__;s__
OTU_1998	0	0	0	0	0	0	0	0	3.81694e-05	0	0	0	0	0	0	0	0	0	0	0	k__Bacteria;p__Chloroflexi;c__TK10;o__;f__;g__;s__
OTU_1999	0	0	0	0	0	0	0	0	0	0	0	0	0	0	0	0	0	3.81694e-05	0	0.000152678	k__Bacteria;p__Actinobacteriota;c__WCHB1-81;o__;f__;g__;s__
[truncated: 5,856 more rows]
