# Supplementary material for: The effects of a set amount of regular maternal exercise during pregnancy on gut microbiota are diet-dependent in mice and do not cause significant diversity changes
Source: PeerJ. 2022 Dec 2;10:e14459. doi: 10.7717/peerj.14459 (PMC9744166; doi:10.7717/peerj.14459)
Supplement: Supplemental Information 3 [file peerj-10-14459-s003.xls]

## Sheet: otu_table.p.relative
Taxonomy	LFD1	LFD2	LFD3	LFD4	LFD5	LFDex1	LFDex2	LFDex3	LFDex4	LFDex5	LFDex6	HFD1	HFD2	HFD3	HFD4	HFDex1	HFDex2	HFDex3	HFDex4	HFDex5	Tax_detail
Firmicutes	0.509714	0.5909	0.39742	0.363754	0.642658	0.235047	0.642505	0.600061	0.451353	0.194702	0.307836	0.62197	0.330394	0.637658	0.735143	0.275659	0.312836	0.693767	0.304325	0.355624	k__Bacteria;p__Firmicutes;
Bacteroidota	0.268102	0.356922	0.333257	0.374823	0.196687	0.5096	0.227833	0.0585137	0.0353449	0.0928661	0.00793923	0.141532	0.207145	0.193404	0.133097	0.627276	0.431276	0.0209932	0.54296	0.0251155	k__Bacteria;p__Bacteroidota;
Actinobacteriota	0.177259	0.0252681	0.0474827	0.0332455	0.0757663	0.0410703	0.0511088	0.318829	0.496546	0.693271	0.66285	0.181419	0.0935532	0.0382457	0.068285	0.0191992	0.0542769	0.239895	0.0872934	0.270965	k__Bacteria;p__Actinobacteriota;
Desulfobacterota	0.00526738	0.00320623	0.0528264	0.0660712	0.03065	0.0139318	0.0122524	0.00148861	0.000572541	0.00145044	0.000534372	0.00832093	0.17119	0.00931333	0.00862628	0.0238177	0.034696	0.0121379	0.00996221	0.257605	k__Bacteria;p__Desulfobacterota;
Proteobacteria	0.00301538	0.00404596	0.0707661	0.00347342	0.00477117	0.0477881	0.00328257	0.00557273	0.00438948	0.00458033	0.00595443	0.0185122	0.0663384	0.00358792	0.0112981	0.00839727	0.0296576	0.0129394	0.01668	0.00759571	k__Bacteria;p__Proteobacteria;
unidentified_Bacteria	0.0145807	0.00576358	0.0458033	0.0579411	0.0136265	0.0601931	0.0350013	0.00545822	0.00351158	0.00416046	0.00564907	0.0079774	0.0503073	0.0144662	0.0179778	0.0280927	0.104889	0.00614527	0.0208023	0.0152678	k__Bacteria;p__unidentified_Bacteria;
Verrucomicrobiota	0.000763388	7.63388e-05	0.000305355	0	7.63388e-05	0.00160311	0.00759571	0.000381694	7.63388e-05	0.000381694	0.000190847	0.000114508	0.00145044	0.0854613	0.00767205	0.00061071	0.000458033	0	0.000725219	0.000114508	k__Bacteria;p__Verrucomicrobiota;
Fusobacteriota	0	0	7.63388e-05	0	0.00110691	0	0	0	0	0	0	0.00103057	3.81694e-05	0	0	0	0.000343525	0.00133593	0	0.00122142	k__Bacteria;p__Fusobacteriota;
Deferribacteres	0.00145044	0.000419863	0.0120234	0.000305355	0	0.00385511	0.00465667	0	0	0	0	7.63388e-05	0.000877896	0.0028627	0.00156495	0.000916065	0.00061071	0	0.000267186	3.81694e-05	k__Bacteria;p__Deferribacteres;
Campilobacterota	0.000343525	0.000267186	0.0258025	0.00923699	0.00362609	0.00267186	0.000725219	0	0	0	0	0.00271003	0.00225199	0.00271003	0.00110691	0.00366426	0.00202298	0.00229016	0.00583992	0.00122142	k__Bacteria;p__Campilobacterota;
Acidobacteriota	0	0	0	0	0	0.00480934	0	0.00309172	0.00209932	0.0023665	0.00225199	0.00687049	0.00446582	0	0	0	0	7.63388e-05	3.81694e-05	0.00347342	k__Bacteria;p__Acidobacteriota;
Myxococcota	0	0	0	0	0	0.0027482	0	0.000534372	0.00061071	0.000763388	0.00061071	0.000687049	0.00874079	0	0	0	0	0	0	0.00114508	k__Bacteria;p__Myxococcota;
Chloroflexi	0	7.63388e-05	0	7.63388e-05	0.000152678	0.00263369	0	0.00213749	0.00164128	0.00164128	0.00225199	0.000801557	0.00469484	0	0	0	7.63388e-05	0.00343525	0	0.00488568	k__Bacteria;p__Chloroflexi;
Nitrospirota	0	0	0	0	0	0.0027482	0	0.000725219	0.000534372	0.000305355	0.000419863	7.63388e-05	0.00198481	0	0	0	3.81694e-05	0	0	0.000687049	k__Bacteria;p__Nitrospirota;
Cyanobacteria	0.000114508	0.000458033	0	0	0	0	3.81694e-05	7.63388e-05	7.63388e-05	7.63388e-05	7.63388e-05	0.000419863	0.000839727	0.000114508	0	0.000114508	3.81694e-05	0	3.81694e-05	0	k__Bacteria;p__Cyanobacteria;
DTB120	0	0	0	0	0	0.000534372	0	0	0	0	0	0	0	0	0	0	0	0	0	0	k__Bacteria;p__DTB120;
Gemmatimonadetes	0	0	0	0	0	0.000381694	0	3.81694e-05	0	3.81694e-05	0	0.000267186	0.000381694	0	0	0	0	0	0	3.81694e-05	k__Bacteria;p__Gemmatimonadetes;
Sva0485	0	0	0	0	0	0.00148861	0	0	0	0	0	0	0.000152678	0	0	0	0	0	0	0.000305355	k__Bacteria;p__Sva0485;
Methylomirabilota	0	0	0	0	0	0.000534372	0	0.000190847	0.000152678	0.000152678	0.000114508	0	0.00061071	0	0	0	0	0	0	0.00229016	k__Bacteria;p__Methylomirabilota;
Synergistota	0	0	0	0.000190847	0.000572541	0	0	0	0	0	0	0.00125959	0	0	0	0	0	0.000763388	0	0	k__Bacteria;p__Synergistota;
Gracilibacteria	0	0	0	0	0	0	0	0	0	0	0	0	0	0	0	0	0	0	0	0	k__Bacteria;p__Gracilibacteria;
Euryarchaeota	0	0	0	0.000267186	0.000763388	0	0	0	0	0	0	7.63388e-05	0	0	0	0	0	0.000229016	0	0.000687049	k__Archaea;p__Euryarchaeota;
MBNT15	0	0	0	0	0	0.000763388	0	0	0	0	3.81694e-05	0	0.00129776	0	0	0.000114508	0	0	0	0	k__Bacteria;p__MBNT15;
Zixibacteria	0	0	0	0	0	0.00145044	0	0	0	0	0	0	0.000343525	0	0	0	0	0	0	0.000190847	k__Bacteria;p__Zixibacteria;
Kryptonia	0	0	0	0	0	0.00125959	0	0	0	0	0	0	0.000229016	0	0	0	0	0	0	0.000114508	k__Bacteria;p__Kryptonia;
Gemmatimonadota	0	0	0	0	0	3.81694e-05	0	0.000267186	0.000229016	0.000229016	0.000229016	3.81694e-05	0.00064888	0	0	3.81694e-05	0	0	0	0.000190847	k__Bacteria;p__Gemmatimonadota;
Deferrisomatota	0	0	0	0	0	7.63388e-05	0	0	0	0	0	0	0.000687049	0	0	0	0	0	0	0	k__Bacteria;p__Deferrisomatota;
Latescibacterota	0	0	0	0	0	0.000267186	0	0	0	7.63388e-05	3.81694e-05	0	0.000343525	0	0	0	0	0	0	3.81694e-05	k__Bacteria;p__Latescibacterota;
NB1-j	0	0	0	0	0	0.000763388	0	0	0.000152678	3.81694e-05	0.000114508	0	0.000229016	0	0	0	0	0	0	0.000152678	k__Bacteria;p__NB1-j;
Armatimonadota	0	0	0	0	0	3.81694e-05	0	0	7.63388e-05	3.81694e-05	3.81694e-05	3.81694e-05	0	0	0	0	0	0	0	0	k__Bacteria;p__Armatimonadota;
Bdellovibrionota	0	0	0	0	0	7.63388e-05	0	7.63388e-05	0.000152678	7.63388e-05	0.000190847	0.000152678	0.000267186	0	0	0	0	0	0	0.000229016	k__Bacteria;p__Bdellovibrionota;
Spirochaetota	0	0	0	0	7.63388e-05	0.000305355	0	0	0	0	0	3.81694e-05	0.000114508	0	0	0	0	0.000114508	0	7.63388e-05	k__Bacteria;p__Spirochaetota;
Deinococcota	0.000763388	0.000877896	0	0	0	0	0	3.81694e-05	3.81694e-05	7.63388e-05	0	0	0	7.63388e-05	3.81694e-05	0	0	0	0	3.81694e-05	k__Bacteria;p__Deinococcota;
Planctomycetota	0	0	0	0	0	0	0	0	0.000190847	3.81694e-05	7.63388e-05	0.000114508	3.81694e-05	0	0	0	0	3.81694e-05	0	3.81694e-05	k__Bacteria;p__Planctomycetota;
GAL15	0	0	0	0	0	0.000114508	0	0.000190847	0.000114508	7.63388e-05	0.000267186	0	0	0	0	0	0	0	0	0.000725219	k__Bacteria;p__GAL15;
Candidatus_Jorgensenbacteria	0	0	0	0	0	0	0	0	0	0	0	0	0	0	0	0	0	0	0	0	k__Bacteria;p__Candidatus_Jorgensenbacteria;
Kapabacteria	0	0	0	0	0	3.81694e-05	0	0	7.63388e-05	7.63388e-05	7.63388e-05	0	0.000152678	0	0	0	0	0	0	0	k__Bacteria;p__Kapabacteria;
Latescibacteria	0	0	0	0	0	0.000152678	0	0	0	0	0	0	0	0	0	0	0	0	0	0.000152678	k__Bacteria;p__Latescibacteria;
WPS-2	0	0	0	0	0	0	0	0	0	0	0	0	0	0	0	0	0	0	0	0	k__Bacteria;p__WPS-2;
Crenarchaeota	0	0	0	0	0	3.81694e-05	0	0.000229016	0.000190847	0.000152678	0.000190847	0.000190847	0	0	0	0	0	0.000267186	0	0.000305355	k__Archaea;p__Crenarchaeota;
unidentified_Archaea	0	0	0	0	0	0	0	0	0	0	0	0	0	0	0	0	0	0	0	0.000343525	k__Archaea;p__unidentified_Archaea;
Elusimicrobiota	0	0	0	0	0	0	0	3.81694e-05	0.000114508	0.000114508	0.000114508	7.63388e-05	7.63388e-05	0	0	0	0	0	0	0	k__Bacteria;p__Elusimicrobiota;
Entotheonellaeota	0	0	0	0	0	0	0	0	0	0	0	0	0.000190847	0	0	0	0	0	0	0	k__Bacteria;p__Entotheonellaeota;
Halobacterota	0	0	0	0	0	3.81694e-05	0	0	0	0	0	0	0	0	0	0	0	0.000152678	0	3.81694e-05	k__Archaea;p__Halobacterota;
Calditrichota	0	0	0	0	0	0.000267186	0	0	0	0	0	0	0	0	0	0	0	0	0	7.63388e-05	k__Bacteria;p__Calditrichota;
Candidatus_Adlerbacteria	0	0	0	0	0	0	0	0	0	0	0	0	0	0	0	0	0	0	0	0	k__Bacteria;p__Candidatus_Adlerbacteria;
Candidatus_Levybacteria	0	0	0	0	0	0	0	0	0	3.81694e-05	3.81694e-05	0	0	0	0	0	0	0	0	0	k__Bacteria;p__Candidatus_Levybacteria;
WOR-1	0	0	0	0	0	0	0	0	0	0	0	0	0	0	0	0	0	0	0	0.000229016	k__Bacteria;p__WOR-1;
Marinimicrobia_(SAR406_clade)	0	0	0	0	3.81694e-05	0	0	0	0	0	0	0	0	0	0	0	0	0	0	0.000114508	k__Bacteria;p__Marinimicrobia_(SAR406_clade);
FCPU426	0	0	0	0	0	0	0	0	0	0	0	0	0	0	0	0	0	0	0	0	k__Bacteria;p__FCPU426;
Caldatribacteriota	0	0	0	0	0	0	0	0	0	0	0	0	0	0	0	0	0	0.000190847	0	0	k__Bacteria;p__Caldatribacteriota;
Thermoplasmatota	0	0	0	0	0	0	0	0.000114508	7.63388e-05	7.63388e-05	3.81694e-05	0	0	0	0	0	0	7.63388e-05	0	0	k__Archaea;p__Thermoplasmatota;
Candidatus_Kaiserbacteria	0	0	0	0	0	0	0	0	0	0	0	0	0	0	0	0	0	0	0	0	k__Bacteria;p__Candidatus_Kaiserbacteria;
Hydrogenedentes	0	0	0	0	0	0	0	0	0	0	0	0	7.63388e-05	0	0	0	0	0	0	3.81694e-05	k__Bacteria;p__Hydrogenedentes;
Berkelbacteria	0	0	0	0	0	0	0	0	0	0	0	0	0	0	0	0	0	0	0	0	k__Bacteria;p__Berkelbacteria;
Fibrobacterota	0	0	0	0	0	0	0	0	0	0	0	0	3.81694e-05	0	0	0	0	0	0	3.81694e-05	k__Bacteria;p__Fibrobacterota;
Aerophobota	0	0	0	0	0	0	0	0	0	0	0	0	0	0	0	0	0	0	0	3.81694e-05	k__Bacteria;p__Aerophobota;
Nitrospinota	0	0	0	0	0	3.81694e-05	0	0	0	0	0	0	0.000152678	0	0	0	0	0	0	0	k__Bacteria;p__Nitrospinota;
Caldisericota	0	0	0	0	0	0	0	0	0	0	0	0	0	0	0	0	0	0	0	0	k__Bacteria;p__Caldisericota;
Abditibacteriota	0	0	0	0	0	0	0	0	0	0	0	0	0	0	0	0	0	0	0	0	k__Bacteria;p__Abditibacteriota;
RCP2-54	0	0	0	0	0	0.000114508	0	0	0	0	0	0	7.63388e-05	0	0	0	0	0	0	0	k__Bacteria;p__RCP2-54;
Candidatus_Yanofskybacteria	0	0	0	0	0	0	0	0	0	0	0	0	0	0	0	0	0	0	0	3.81694e-05	k__Bacteria;p__Candidatus_Yanofskybacteria;
Planctomycetes	0	0	0	0	0	0	0	0	0	0	0	0	3.81694e-05	0	0	0	0	0	0	0	k__Bacteria;p__Planctomycetes;
Sumerlaeota	0	0	0	0	0	0	0	0	0	0	0	0	3.81694e-05	0	0	0	0	0	0	0	k__Bacteria;p__Sumerlaeota;
Dadabacteria	0	0	0	0	0	0	0	0	0	0	0	0	0	0	0	0	0	0	0	0	k__Bacteria;p__Dadabacteria;
Parcubacteria	0	0	0	0	0	0	0	0	0	0	0	0	0	0	0	0	0	0	0	0	k__Bacteria;p__Parcubacteria;
Elusimicrobia	0	0	0	0	0	0	0	0.000114508	7.63388e-05	3.81694e-05	3.81694e-05	0	3.81694e-05	0	0	0	0	0	0	7.63388e-05	k__Bacteria;p__Elusimicrobia;
Nanoarchaeota	0	0	0	0	0	0	0	0	0	0	0	0	0	0	0	0	0	0	0	0.000114508	k__Archaea;p__Nanoarchaeota;
TA06	0	0	0	0	0	0.000114508	0	0	0	0	0	0	0	0	0	0	0	0	0	0	k__Bacteria;p__TA06;
SAR324_clade(Marine_group_B)	0	0	0	0	0	0	0	0	0	0	0	0	0.000114508	0	0	0	0	0	0	0	k__Bacteria;p__SAR324_clade(Marine_group_B);
Chlamydiae	0	0	0	0	0	7.63388e-05	0	0	0	0	0	3.81694e-05	0	0	0	0	0	0	0	0	k__Bacteria;p__Chlamydiae;
Aenigmarchaeota	0	0	0	0	0	0	0	0	0	0	0	0	0	0	0	0	0	7.63388e-05	0	0	k__Archaea;p__Aenigmarchaeota;
WS4	0	0	0	0	0	0	0	0	0	0	0	0	0	0	0	0	7.63388e-05	0	0	0	k__Bacteria;p__WS4;
Candidatus_Terrybacteria	0	0	0	0	0	0	0	0	0	0	0	0	0	0	0	0	0	0	0	0	k__Bacteria;p__Candidatus_Terrybacteria;
TX1A-33	0	0	0	0	0	0	0	0	0	0	0	0	0	0	0	0	0	0	0	0	k__Bacteria;p__TX1A-33;
WS2	0	0	0	0	0	0	0	0	0	0	0	0	0	0	0	0	0	0	0	0	k__Bacteria;p__WS2;
Margulisbacteria	0	0	0	0	0	0	0	0	0	0	0	0	0	0	0	0	0	0	0	0	k__Bacteria;p__Margulisbacteria;
Candidatus_Daviesbacteria	0	0	0	0	0	0	0	0	0	0	0	0	0	0	0	0	0	0	0	0	k__Bacteria;p__Candidatus_Daviesbacteria;
Iainarchaeota	0	0	0	0	0	0	0	0	0	0	0	0	0	0	0	0	0	0	0	7.63388e-05	k__Archaea;p__Iainarchaeota;
Candidatus_Pacebacteria	0	0	0	0	0	0	0	0	0	0	0	0	0	0	0	0	0	0	0	0	k__Bacteria;p__Candidatus_Pacebacteria;
10bav-F6	0	0	0	0	0	0	0	0	0	0	0	0	0	0	0	0	0	0	0	7.63388e-05	k__Bacteria;p__10bav-F6;
Candidatus_Uhrbacteria	0	0	0	0	0	0	0	0	0	0	0	0	0	0	0	0	0	0	0	0	k__Bacteria;p__Candidatus_Uhrbacteria;
Acetothermia	0	0	0	0	0	3.81694e-05	0	0	0	0	0	0	0	0	0	0	0	3.81694e-05	0	0	k__Bacteria;p__Acetothermia;
Candidatus_Woesebacteria	0	0	0	0	0	0	0	0	0	0	0	0	0	0	0	0	0	0	0	0	k__Bacteria;p__Candidatus_Woesebacteria;
Candidatus_Ryanbacteria	0	0	0	0	0	0	0	0	0	0	0	0	0	0	0	0	0	0	0	0	k__Bacteria;p__Candidatus_Ryanbacteria;
CK-2C2-2	0	0	0	0	0	0	0	0	0	0	0	0	0	0	0	0	0	0	0	0	k__Bacteria;p__CK-2C2-2;
Schekmanbacteria	0	0	0	0	0	0	0	0	0	0	0	0	0	0	0	0	0	0	0	0	k__Bacteria;p__Schekmanbacteria;
Candidatus_Magasanikbacteria	0	0	0	0	0	0	0	0	0	0	0	0	0	0	0	0	0	0	0	0	k__Bacteria;p__Candidatus_Magasanikbacteria;
LCP-89	0	0	0	0	0	0	0	0	0	0	0	0	0	0	0	0	0	0	0	0	k__Bacteria;p__LCP-89;
Thermotogae	0	0	0	0	0	0	0	0	0	0	0	0	0	0	0	0	0	0	0	0	k__Bacteria;p__Thermotogae;
Asgardarchaeota	0	0	0	0	0	0	0	0	0	0	0	0	0	0	0	0	0	0	0	0	k__Archaea;p__Asgardarchaeota;
Others	0.0186267	0.011718	0.0142372	0.0906141	0.0294286	0.0622925	0.0150006	0.00183213	0.00160311	0.00209932	0.00183213	0.00519104	0.0493912	0.0120997	0.0151914	0.0120997	0.0287034	0.00503836	0.0110691	0.0481698	Others
