# Supplementary material for: The effects of a set amount of regular maternal exercise during pregnancy on gut microbiota are diet-dependent in mice and do not cause significant diversity changes
Source: PeerJ. 2022 Dec 2;10:e14459. doi: 10.7717/peerj.14459 (PMC9744166; doi:10.7717/peerj.14459)
Supplement: Supplemental Information 5 [file peerj-10-14459-s005.xls]

## Sheet: otu_table.g.relative
Taxonomy	LFD1	LFD2	LFD3	LFD4	LFD5	LFDex1	LFDex2	LFDex3	LFDex4	LFDex5	LFDex6	HFD1	HFD2	HFD3	HFD4	HFDex1	HFDex2	HFDex3	HFDex4	HFDex5	Tax_detail
Lactobacillus	0.275163	0.42139	0.265735	0.105691	0.584106	0.0485896	0.419558	0.387916	0.0950418	0.0599641	0.137104	0.0131303	0.0419863	0.485209	0.534143	0.174854	0.0370625	0.0392	0.219818	0.0111073	k__Bacteria;p__Firmicutes;c__Bacilli;o__Lactobacillales;f__Lactobacillaceae;g__Lactobacillus;
Faecalibaculum	0.0431696	0.0248483	0.0493912	0.000801557	0.0013741	0.0206878	0.0256117	0.0255353	0.00652697	0.114088	0.051376	0.559983	0.104622	0.0136265	0.0390473	0.00889347	0.0811481	0.386351	0.0110691	0.243864	k__Bacteria;p__Firmicutes;c__Bacilli;o__Erysipelotrichales;f__Erysipelotrichaceae;g__Faecalibaculum;
Bifidobacterium	0.172068	0.0154586	0.0197336	0.00217566	0.0023665	0.0128249	0.035612	0.313256	0.491698	0.686782	0.657162	0.15867	0.0311462	0.0208023	0.0315661	0.00782473	0.027711	0.226879	0.0553838	0.252758	k__Bacteria;p__Actinobacteriota;c__Actinobacteria;o__Bifidobacteriales;f__Bifidobacteriaceae;g__Bifidobacterium;
Candidatus_Arthromitus	0.000305355	0.000305355	0.000267186	0.00893164	0.00297721	0.000190847	0.000305355	0.176877	0.328142	0.0142372	0.0919882	0.00404596	0.000381694	0.000305355	0.000229016	0.000877896	0.00064888	0.00454216	0.00259552	0.0018703	k__Bacteria;p__Firmicutes;c__Clostridia;o__Clostridiales;f__Clostridiaceae;g__Candidatus_Arthromitus;
Alloprevotella	0.00301538	0.00061071	0.0130158	0.00129776	0.00385511	0.041681	0.00484751	0	0	0	0	0.000496202	0.0142754	0.00618344	0.00255735	0.0106493	0.0320241	0.00229016	0.00515287	0.00164128	k__Bacteria;p__Bacteroidota;c__Bacteroidia;o__Bacteroidales;f__Prevotellaceae;g__Alloprevotella;
Bacteroides	0.0109546	0.00809191	0.0113363	0.0136646	0.00358792	0.0323295	0.00858811	0	0.000190847	7.63388e-05	3.81694e-05	0.0018703	0.0235505	0.0124814	0.00820642	0.0471774	0.145044	0.00255735	0.0230161	0.00118325	k__Bacteria;p__Bacteroidota;c__Bacteroidia;o__Bacteroidales;f__Bacteroidaceae;g__Bacteroides;
Desulfovibrio	0.00339708	0.00167945	0.0523684	0.0651933	0.0304973	0.0120615	0.0119852	0.00148861	0.000419863	0.00145044	0.000534372	0.00790106	0.162602	0.00862628	0.00782473	0.0237032	0.0345815	0.011489	0.00893164	0.25604	k__Bacteria;p__Desulfobacterota;c__Desulfovibrionia;o__Desulfovibrionales;f__Desulfovibrionaceae;g__Desulfovibrio;
Streptococcus	7.63388e-05	7.63388e-05	0.000152678	0.000572541	0.000305355	0.000343525	3.81694e-05	0.00114508	0.00190847	0.000267186	0.000496202	0.000763388	0.000152678	7.63388e-05	0.000534372	0	0.00145044	0.0013741	0.000229016	0.0018703	k__Bacteria;p__Firmicutes;c__Bacilli;o__Lactobacillales;f__Streptococcaceae;g__Streptococcus;
Dubosiella	0.0643154	0.0379785	0.00442765	0.000305355	0.000114508	0.00526738	0.0861865	0.00171762	0.00148861	0.00148861	0.0139318	0.000381694	0.0042368	0.0338944	0.0586664	0.0305355	0.00465667	0.18432	0.000839727	0.000381694	k__Bacteria;p__Firmicutes;c__Bacilli;o__Erysipelotrichales;f__Erysipelotrichaceae;g__Dubosiella;
Ralstonia	0	0	0.00702317	0	0	7.63388e-05	0	0	0	0	0	0	7.63388e-05	0	0	0.000114508	0	0	0	0	k__Bacteria;p__Proteobacteria;c__Gammaproteobacteria;o__Burkholderiales;f__Burkholderiaceae;g__Ralstonia;
Enterorhabdus	0.00328257	0.00580175	0.0101912	0.0267949	0.0667583	0.00576358	0.00854994	0.0013741	0.00141227	0.00259552	0.00148861	0.0046185	0.0116798	0.00255735	0.00435131	0.00435131	0.00530555	0.00416046	0.00354975	0.00576358	k__Bacteria;p__Actinobacteriota;c__Coriobacteriia;o__Coriobacteriales;f__Eggerthellaceae;g__Enterorhabdus;
Turicibacter	0.00790106	0.00339708	0	0	0.000114508	0	0.00244284	0.00133593	0.0117943	0.000992404	0.00954235	3.81694e-05	3.81694e-05	0.00763388	0.00114508	0.00877896	3.81694e-05	7.63388e-05	0.000877896	0.000114508	k__Bacteria;p__Firmicutes;c__Bacilli;o__Erysipelotrichales;f__Erysipelotrichaceae;g__Turicibacter;
Enterococcus	0	0.000152678	0	3.81694e-05	3.81694e-05	3.81694e-05	0.000114508	0	0.000267186	7.63388e-05	0	0.000114508	3.81694e-05	3.81694e-05	0	0	0	0.000381694	7.63388e-05	0.000190847	k__Bacteria;p__Firmicutes;c__Bacilli;o__Lactobacillales;f__Enterococcaceae;g__Enterococcus;
Porphyromonas	0	0	0	0	0.000114508	0	0	0	0	0	0	0	0	0	7.63388e-05	7.63388e-05	0	0	0	0.000572541	k__Bacteria;p__Bacteroidota;c__Bacteroidia;o__Bacteroidales;f__Porphyromonadaceae;g__Porphyromonas;
Alistipes	0.00931333	0.00431314	0.00633612	0.0860338	0.0028627	0.0301157	0.0223291	0	0	0	0	0.000534372	0.00805374	0.0137792	0.0101531	0.0122905	0.021413	0.00125959	0.0171762	0.00232833	k__Bacteria;p__Bacteroidota;c__Bacteroidia;o__Bacteroidales;f__Rikenellaceae;g__Alistipes;
Akkermansia	0.000763388	7.63388e-05	0.000305355	0	3.81694e-05	0.000992404	0.00759571	0	0	0	0	0	0.000725219	0.0854613	0.00767205	0.00061071	0.000458033	0	0.000725219	0	k__Bacteria;p__Verrucomicrobiota;c__Verrucomicrobiae;o__Verrucomicrobiales;f__Akkermansiaceae;g__Akkermansia;
Muribaculum	0.00450399	0.0100767	0.00282454	0	0	0.00469484	0.00217566	0.000229016	0.000152678	0.000152678	0	0.00225199	0.00305355	0.00347342	0.00255735	0.00847361	0.00480934	3.81694e-05	0.0112981	0	k__Bacteria;p__Bacteroidota;c__Bacteroidia;o__Bacteroidales;f__Muribaculaceae;g__Muribaculum;
Stenotrophomonas	0.000114508	3.81694e-05	0	0	0	3.81694e-05	0.000534372	0	0	0	0	0	0	0.000687049	3.81694e-05	0.00500019	0	0	0.0138173	0	k__Bacteria;p__Proteobacteria;c__Gammaproteobacteria;o__Xanthomonadales;f__Xanthomonadaceae;g__Stenotrophomonas;
Clostridium_sensu_stricto_1	0.00568724	0.000687049	0	0.000458033	0.000229016	0.000190847	0.00389328	0.000381694	0.00148861	0.000114508	7.63388e-05	0.00129776	0.00152678	0.00484751	0.000763388	0.00335891	0.000229016	0.00450399	0.000839727	0.000534372	k__Bacteria;p__Firmicutes;c__Clostridia;o__Clostridiales;f__Clostridiaceae;g__Clostridium_sensu_stricto_1;
Prevotella	0	0	0	3.81694e-05	0.00190847	0	0.000114508	0	3.81694e-05	3.81694e-05	0	0.000114508	0	0	0	0	0.000419863	0.000687049	0	0.00255735	k__Bacteria;p__Bacteroidota;c__Bacteroidia;o__Bacteroidales;f__Prevotellaceae;g__Prevotella;
Lachnospiraceae_NK4A136_group	0.0185122	0.0255735	0.0104966	0.0403451	0.0061071	0.0271384	0.0248864	0.000381694	0	0	3.81694e-05	0.00232833	0.0237414	0.0163365	0.0224436	0.00843544	0.0205733	0.00312989	0.0125196	0.0107638	k__Bacteria;p__Firmicutes;c__Clostridia;o__Lachnospirales;f__Lachnospiraceae;g__Lachnospiraceae_NK4A136_group;
Parabacteroides	0.00202298	0.00232833	0.006985	0.00542005	0.00129776	0.0196572	0.00484751	0	7.63388e-05	0	0	0.000687049	0.0383984	0.00244284	0.00542005	0.0134738	0.0259934	0.00351158	0.0109546	0.000687049	k__Bacteria;p__Bacteroidota;c__Bacteroidia;o__Bacteroidales;f__Tannerellaceae;g__Parabacteroides;
Pseudomonas	0	0	7.63388e-05	0	0	0.000152678	0.000229016	0	0	3.81694e-05	3.81694e-05	0	0.000343525	0.000114508	0	0.000725219	7.63388e-05	0	0.000877896	0.000114508	k__Bacteria;p__Proteobacteria;c__Gammaproteobacteria;o__Pseudomonadales;f__Pseudomonadaceae;g__Pseudomonas;
Fusobacterium	0	0	7.63388e-05	0	0.000877896	0	0	0	0	0	0	0.00103057	3.81694e-05	0	0	0	0.000343525	0.00125959	0	0.000725219	k__Bacteria;p__Fusobacteriota;c__Fusobacteriia;o__Fusobacteriales;f__Fusobacteriaceae;g__Fusobacterium;
Candidatus_Saccharimonas	0.000190847	3.81694e-05	0.0322913	0.0248101	0.00183213	0.0168327	0.00316806	0.000305355	0.000114508	7.63388e-05	3.81694e-05	0.00240467	0.0088553	0.000343525	0.00133593	0.00118325	0.0503454	0.000229016	0.0074812	0.00106874	k__Bacteria;p__unidentified_Bacteria;c__Saccharimonadia;o__Saccharimonadales;f__Saccharimonadaceae;g__Candidatus_Saccharimonas;
Escherichia-Shigella	0.000992404	0.000458033	0.0206115	0.000687049	0.000763388	0.0195046	0.000763388	0.000458033	0.000229016	3.81694e-05	0.000343525	0.0111836	0.0257643	0.00171762	0.0100004	0.00103057	0.0140082	0.0104966	0.00106874	0.00141227	k__Bacteria;p__Proteobacteria;c__Gammaproteobacteria;o__Enterobacterales;f__Enterobacteriaceae;g__Escherichia-Shigella;
Odoribacter	0.00282454	0.00217566	0.000877896	0.0488568	0.00198481	0.00118325	0.000954235	0	0	0	0	0.000496202	0.000954235	0.000877896	0.00106874	0.00263369	0.00141227	7.63388e-05	0.00175579	0.000190847	k__Bacteria;p__Bacteroidota;c__Bacteroidia;o__Bacteroidales;f__Marinifilaceae;g__Odoribacter;
Neisseria	0	0	0	0	0.000458033	0	0	0	0	0	0	0	0	0	0	0	0	0	0	0.00110691	k__Bacteria;p__Proteobacteria;c__Gammaproteobacteria;o__Burkholderiales;f__Neisseriaceae;g__Neisseria;
Lachnoclostridium	0.00202298	0.00232833	0.000839727	0.00603076	0.00755754	0.00244284	0.00145044	0.000725219	0.00061071	0.00114508	0.000381694	0.0110691	0.00583992	0.00198481	0.00312989	0.000992404	0.0116035	0.00328257	0.00103057	0.0188175	k__Bacteria;p__Firmicutes;c__Clostridia;o__Lachnospirales;f__Lachnospiraceae;g__Lachnoclostridium;
Mucispirillum	0.00145044	0.000419863	0.0120234	0.000305355	0	0.00385511	0.00465667	0	0	0	0	7.63388e-05	0.000877896	0.0028627	0.00156495	0.000916065	0.00061071	0	0.000267186	3.81694e-05	k__Bacteria;p__Deferribacteres;c__unidentified_Deferribacteres;o__Deferribacterales;f__Deferribacteraceae;g__Mucispirillum;
[Eubacterium]_xylanophilum_group	0.00473301	0.00301538	0.00900798	0.0449635	0.00110691	0.00328257	0.00347342	0	0	0	7.63388e-05	0	0.00156495	0.00202298	0.00251918	0.00221382	0.0056109	0.000114508	0.00175579	0.0023665	k__Bacteria;p__Firmicutes;c__Clostridia;o__Lachnospirales;f__Lachnospiraceae;g__[Eubacterium]_xylanophilum_group;
Staphylococcus	0.00664147	0.0120615	0.000916065	0	7.63388e-05	0.00893164	0.00320623	0.000114508	7.63388e-05	0.000114508	0.000152678	0	0.00484751	0.00125959	0.0158785	0.00167945	0.00507653	0.000916065	0.00148861	7.63388e-05	k__Bacteria;p__Firmicutes;c__Bacilli;o__Staphylococcales;f__Staphylococcaceae;g__Staphylococcus;
Oenococcus	0	0	0	0	0	0	0	0	0	0	0	0	0	0	0	0	0	0	0	0	k__Bacteria;p__Firmicutes;c__Bacilli;o__Lactobacillales;f__Leuconostocaceae;g__Oenococcus;
Dialister	0	0	0	0.000114508	0.000267186	0	0	0	0	3.81694e-05	0	0	0	0	0	3.81694e-05	0	0	0	0.000534372	k__Bacteria;p__Firmicutes;c__Negativicutes;o__Veillonellales-Selenomonadales;f__Veillonellaceae;g__Dialister;
Rothia	0	0	0	0	3.81694e-05	7.63388e-05	0	0	0	3.81694e-05	0	0	7.63388e-05	3.81694e-05	0	0	0	3.81694e-05	0	0.000229016	k__Bacteria;p__Actinobacteriota;c__Actinobacteria;o__Micrococcales;f__Micrococcaceae;g__Rothia;
Abiotrophia	0	0	0	0	0	0	0	0	0	0	0	0	0	0	0	0	0	0	0	0	k__Bacteria;p__Firmicutes;c__Bacilli;o__Lactobacillales;f__Aerococcaceae;g__Abiotrophia;
Romboutsia	0.0018703	0.000916065	0	0	0.00145044	7.63388e-05	0.00496202	0	0.000114508	3.81694e-05	0	0.000152678	0.00542005	0.0115272	0.00412229	0.000496202	0.00129776	7.63388e-05	0.000152678	0.000229016	k__Bacteria;p__Firmicutes;c__Clostridia;o__Peptostreptococcales-Tissierellales;f__Peptostreptococcaceae;g__Romboutsia;
Monoglobus	0.000763388	0.000152678	0.0131303	0.000992404	0.000152678	0.00774839	0.00156495	3.81694e-05	3.81694e-05	0	0	0.000114508	0.0327112	0.0013741	0.000458033	0.00106874	0.0104966	0.0046185	0.000954235	0.000267186	k__Bacteria;p__Firmicutes;c__Clostridia;o__Monoglobales;f__Monoglobaceae;g__Monoglobus;
Megamonas	0	0	0	0	0	0	0	3.81694e-05	0	0	0	0	0	0	3.81694e-05	0	0	0	0	0	k__Bacteria;p__Firmicutes;c__Negativicutes;o__Veillonellales-Selenomonadales;f__Selenomonadaceae;g__Megamonas;
Prevotellaceae_UCG-001	0.00335891	0.014199	0.00339708	0.000381694	0.000152678	0.0294286	0.000458033	0	0	0	0	7.63388e-05	0.00213749	0.00271003	0.000267186	0.00255735	0.0056109	3.81694e-05	0.00232833	0	k__Bacteria;p__Bacteroidota;c__Bacteroidia;o__Bacteroidales;f__Prevotellaceae;g__Prevotellaceae_UCG-001;
Raoultella	3.81694e-05	0	0.0279782	0.000343525	0.000229016	0.000343525	0	0	0	0	0	0.000152678	0.000267186	0	3.81694e-05	0	0.000496202	0.000305355	0	0.00064888	k__Bacteria;p__Proteobacteria;c__Gammaproteobacteria;o__Enterobacterales;f__Enterobacteriaceae;g__Raoultella;
Helicobacter	3.81694e-05	3.81694e-05	0.0258025	0.00923699	0.0027482	0.00267186	0.000725219	0	0	0	0	0.00259552	0.00225199	0.00240467	0.00106874	0.00366426	0.00198481	0.00209932	0.00488568	0.000725219	k__Bacteria;p__Campilobacterota;c__Campylobacteria;o__Campylobacterales;f__Helicobacteraceae;g__Helicobacter;
Elizabethkingia	0	0	0.0256498	0	0	0	0	0	0	0	0	0	0	0	0	0	0	0	0	0	k__Bacteria;p__Bacteroidota;c__Bacteroidia;o__Flavobacteriales;f__Weeksellaceae;g__Elizabethkingia;
Klebsiella	0	3.81694e-05	7.63388e-05	7.63388e-05	3.81694e-05	7.63388e-05	7.63388e-05	0	0	0	0	0	0.000114508	7.63388e-05	3.81694e-05	3.81694e-05	0.00064888	0.000916065	0	0.000152678	k__Bacteria;p__Proteobacteria;c__Gammaproteobacteria;o__Enterobacterales;f__Enterobacteriaceae;g__Klebsiella;
Veillonella	0	0	3.81694e-05	3.81694e-05	0.000229016	0	3.81694e-05	0	0.000687049	0	0	0.000114508	0	0	0.000114508	0	0.000572541	3.81694e-05	0.000152678	0.000419863	k__Bacteria;p__Firmicutes;c__Negativicutes;o__Veillonellales-Selenomonadales;f__Veillonellaceae;g__Veillonella;
Lachnospiraceae_UCG-006	0.00198481	0.00290087	0.00194664	0.00396962	0.00362609	0.00175579	0.00251918	3.81694e-05	0	7.63388e-05	3.81694e-05	0.00209932	0.00446582	0.00103057	0.00217566	0.000534372	0.0105729	0.00332074	0.000954235	0.0064888	k__Bacteria;p__Firmicutes;c__Clostridia;o__Lachnospirales;f__Lachnospiraceae;g__Lachnospiraceae_UCG-006;
[Ruminococcus]_torques_group	0	3.81694e-05	0	3.81694e-05	3.81694e-05	0.00064888	0.000190847	0	0	0	0	0.000190847	0.000229016	0.00110691	0.000305355	0.000114508	0.000572541	0.0241612	0.000381694	3.81694e-05	k__Bacteria;p__Firmicutes;c__Clostridia;o__Lachnospirales;f__Lachnospiraceae;g__[Ruminococcus]_torques_group;
Coriobacteriaceae_UCG-002	0.000763388	0.00148861	0.0124814	0	3.81694e-05	0.0134356	0.00110691	3.81694e-05	0	0	0	0.000419863	0.00725219	0.00309172	0.00690866	0.000229016	0.0101912	0.000572541	0.00110691	0.000267186	k__Bacteria;p__Actinobacteriota;c__Coriobacteriia;o__Coriobacteriales;f__Atopobiaceae;g__Coriobacteriaceae_UCG-002;
Roseburia	0.0147716	0.0196954	0.000916065	0.0145425	0.00290087	0.00179396	0.000877896	3.81694e-05	0	0.000190847	7.63388e-05	0.000801557	0.00564907	0.0032444	0.00488568	0.000229016	0.00832093	0.000687049	0.00408413	0.00209932	k__Bacteria;p__Firmicutes;c__Clostridia;o__Lachnospirales;f__Lachnospiraceae;g__Roseburia;
Anaerotruncus	0.0023665	0.000916065	0.00217566	0.00435131	0.000267186	0.00164128	0.00160311	0	3.81694e-05	3.81694e-05	0	0	0.00209932	0.00278637	0.00396962	0.000763388	0.0027482	0.000572541	0.00141227	0.00179396	k__Bacteria;p__Firmicutes;c__Clostridia;o__Oscillospirales;f__Ruminococcaceae;g__Anaerotruncus;
Lachnoanaerobaculum	0	0	0	0	0.000496202	0	0	0	0	0	0	0	0	0	0	0	0	0	0	0.000419863	k__Bacteria;p__Firmicutes;c__Clostridia;o__Lachnospirales;f__Lachnospiraceae;g__Lachnoanaerobaculum;
Blautia	0.00194664	0.000534372	0.00133593	0.000496202	0.000458033	0.00400779	0.00148861	0	0	0	0	7.63388e-05	0.0167182	0.00129776	0.00206115	0.00347342	0.00805374	0.000190847	0.00125959	0.00625978	k__Bacteria;p__Firmicutes;c__Clostridia;o__Lachnospirales;f__Lachnospiraceae;g__Blautia;
Haemophilus	0	0	0	0	7.63388e-05	0	0.000114508	0	0	0	0	0	0	0	0	0	0.000343525	0	0	0.000572541	k__Bacteria;p__Proteobacteria;c__Gammaproteobacteria;o__Pasteurellales;f__Pasteurellaceae;g__Haemophilus;
Atopostipes	0.000114508	7.63388e-05	0	0	0	0	0.000877896	0.000534372	0.000152678	0	3.81694e-05	0	3.81694e-05	7.63388e-05	0	0.000458033	0	0	0.000419863	0	k__Bacteria;p__Firmicutes;c__Bacilli;o__Lactobacillales;f__Carnobacteriaceae;g__Atopostipes;
Allorhizobium-Neorhizobium-Pararhizobium-Rhizobium	0	3.81694e-05	0	0	0	0.000114508	0	0.000305355	0.000152678	0.000190847	0.000190847	3.81694e-05	0	0	0	0	0	0	0	0	k__Bacteria;p__Proteobacteria;c__Alphaproteobacteria;o__Rhizobiales;f__Rhizobiaceae;g__Allorhizobium-Neorhizobium-Pararhizobium-Rhizobium;
Acinetobacter	0	0	3.81694e-05	0	0	3.81694e-05	0	0	0	3.81694e-05	0	0	0	0	0	0	0	0.000381694	0	0	k__Bacteria;p__Proteobacteria;c__Gammaproteobacteria;o__Pseudomonadales;f__Moraxellaceae;g__Acinetobacter;
Oscillibacter	0.00271003	0.000954235	0.000916065	0.00206115	0.000114508	0.00290087	0.00259552	0	0	0	0	0	0.0018703	0.00328257	0.00194664	0.00194664	0.00217566	0.000114508	0.00148861	0.000343525	k__Bacteria;p__Firmicutes;c__Clostridia;o__Oscillospirales;f__Oscillospiraceae;g__Oscillibacter;
Family_XIII_AD3011_group	0.000343525	3.81694e-05	0.00103057	0.00404596	0.00148861	0.00106874	0.00240467	0	0	0	0	0.000534372	0.000992404	0.00301538	0.00206115	0.000763388	0.00335891	0.000267186	0.000801557	0.000419863	k__Bacteria;p__Firmicutes;c__Clostridia;o__Peptostreptococcales-Tissierellales;f__Anaerovoracaceae;g__Family_XIII_AD3011_group;
Komagataeibacter	0	0	0	0	0	0	0	0	0	0	0	0	0	0	0	0	0	0	0	0	k__Bacteria;p__Proteobacteria;c__Alphaproteobacteria;o__Acetobacterales;f__Acetobacteraceae;g__Komagataeibacter;
Parasutterella	0.00164128	0.00297721	0.0103057	0.000381694	7.63388e-05	0.0119089	0.00122142	0.00064888	0.000458033	0.000305355	0.000343525	0.000152678	0.0125577	0.000763388	0.000954235	0.00125959	0.0079774	7.63388e-05	0.000763388	0.000190847	k__Bacteria;p__Proteobacteria;c__Gammaproteobacteria;o__Burkholderiales;f__Sutterellaceae;g__Parasutterella;
Hungatella	0	0	0	0.000114508	7.63388e-05	0	0	0	0	0	0	7.63388e-05	0	7.63388e-05	0	0	0	0	0	7.63388e-05	k__Bacteria;p__Firmicutes;c__Clostridia;o__Lachnospirales;f__Lachnospiraceae;g__Hungatella;
Corynebacterium	0.000229016	7.63388e-05	0	0	0	0.000839727	0.000534372	0.000267186	0.000381694	0.000229016	0.000229016	0	0.000725219	0.000267186	0.000229016	0.000305355	0.000954235	0.000267186	0.000419863	0	k__Bacteria;p__Actinobacteriota;c__Actinobacteria;o__Corynebacteriales;f__Corynebacteriaceae;g__Corynebacterium;
Actinomyces	0	0	0	0	0.000190847	0	0	0	0	0	0	0	0	0	0	0	3.81694e-05	7.63388e-05	0	0.000229016	k__Bacteria;p__Actinobacteriota;c__Actinobacteria;o__Actinomycetales;f__Actinomycetaceae;g__Actinomyces;
Colidextribacter	0.0046185	0.00267186	0.00542005	0.00874079	0.000801557	0.011718	0.00813008	3.81694e-05	0	0	0	0.000114508	0.00992404	0.0061071	0.00351158	0.0042368	0.0108401	0.000725219	0.00354975	0.00122142	k__Bacteria;p__Firmicutes;c__Clostridia;o__Oscillospirales;f__Oscillospiraceae;g__Colidextribacter;
Sphingomonas	0	0	0	0	0	0	0	0.000381694	0.000343525	0.000305355	0.000572541	0.00114508	0.000152678	0	0	3.81694e-05	0	0	0	0.000267186	k__Bacteria;p__Proteobacteria;c__Alphaproteobacteria;o__Sphingomonadales;f__Sphingomonadaceae;g__Sphingomonas;
Terrisporobacter	7.63388e-05	0	0	0	0	0	0	0	7.63388e-05	0	0.000152678	0.00190847	0	0	0	0	0	0.000305355	0.000114508	0.000496202	k__Bacteria;p__Firmicutes;c__Clostridia;o__Peptostreptococcales-Tissierellales;f__Peptostreptococcaceae;g__Terrisporobacter;
[Eubacterium]_nodatum_group	0.000419863	0.000305355	0.000916065	0.0105729	0.000687049	0.00106874	0.00125959	0	0	0	0	0.000114508	0.00064888	0.000725219	0.000267186	0.000954235	0.000725219	3.81694e-05	0.000572541	0.00064888	k__Bacteria;p__Firmicutes;c__Clostridia;o__Peptostreptococcales-Tissierellales;f__Anaerovoracaceae;g__[Eubacterium]_nodatum_group;
Ileibacterium	0	0	0.000419863	0	0	0.00232833	0	0	0	0	0	0	0.00232833	0	0	0	0.00164128	0	0	0	k__Bacteria;p__Firmicutes;c__Bacilli;o__Erysipelotrichales;f__Erysipelotrichaceae;g__Ileibacterium;
Gemella	0	0	0	0	0	3.81694e-05	0	0	0	0	0	3.81694e-05	0	0	0	0	0	0	0	3.81694e-05	k__Bacteria;p__Firmicutes;c__Bacilli;o__Staphylococcales;f__Gemellaceae;g__Gemella;
unidentified_Lachnospiraceae	0.000534372	0.000725219	0.000381694	0.00160311	0.000152678	0.00225199	0.000114508	0	3.81694e-05	0	0	7.63388e-05	0.00061071	0.000496202	0.000992404	0.000229016	0.000419863	3.81694e-05	0.000114508	0.000267186	k__Bacteria;p__unidentified_Bacteria;c__Clostridia;o__Lachnospirales;f__Lachnospiraceae;g__unidentified_Lachnospiraceae;
Lachnospiraceae_UCG-001	0.000496202	0.00064888	0.00061071	0.000305355	0.000152678	0.00148861	0.000916065	0.000343525	7.63388e-05	7.63388e-05	3.81694e-05	3.81694e-05	0.00110691	0.000839727	0.000496202	0	0.00179396	0	0.000152678	0.00942784	k__Bacteria;p__Firmicutes;c__Clostridia;o__Lachnospirales;f__Lachnospiraceae;g__Lachnospiraceae_UCG-001;
Campylobacter	0.000305355	0.000229016	0	0	0.000763388	0	0	0	0	0	0	0.000114508	0	0.000305355	3.81694e-05	0	3.81694e-05	0.000190847	0.000954235	0.000496202	k__Bacteria;p__Campilobacterota;c__Campylobacteria;o__Campylobacterales;f__Campylobacteraceae;g__Campylobacter;
Faecalibacterium	0	3.81694e-05	7.63388e-05	0.000305355	0.000267186	0	0.000114508	0	0.000114508	7.63388e-05	0	7.63388e-05	0	0	0	0	0.00862628	0	0	0.000267186	k__Bacteria;p__Firmicutes;c__Clostridia;o__Oscillospirales;f__Ruminococcaceae;g__Faecalibacterium;
Stomatobaculum	0	0	0	0	0.000190847	0	0	0	0	0	0	0	0	0	0	0	0	0	0	0.000114508	k__Bacteria;p__Firmicutes;c__Clostridia;o__Lachnospirales;f__Lachnospiraceae;g__Stomatobaculum;
Kocuria	0	0	0	0	0	0	0	0	0	0	0	3.81694e-05	7.63388e-05	0	0	0	0	3.81694e-05	0	0	k__Bacteria;p__Actinobacteriota;c__Actinobacteria;o__Micrococcales;f__Micrococcaceae;g__Kocuria;
TM7x	0	0	0	0	0.000152678	0	0	0	0	0	0	0	0	0	0	0	0	0	0	0.000267186	k__Bacteria;p__unidentified_Bacteria;c__Saccharimonadia;o__Saccharimonadales;f__Saccharimonadaceae;g__TM7x;
Christensenellaceae_R-7_group	0.000190847	3.81694e-05	0.000954235	0.000534372	0.00118325	0.000305355	0.000534372	0	0	0	0	0.00225199	0.000419863	0.000419863	0.000152678	3.81694e-05	0.00110691	0.00171762	0.000152678	0.00202298	k__Bacteria;p__Firmicutes;c__Clostridia;o__Christensenellales;f__Christensenellaceae;g__Christensenellaceae_R-7_group;
Jeotgalicoccus	3.81694e-05	0.000229016	3.81694e-05	0	0	0.000152678	0.00156495	0.000572541	7.63388e-05	7.63388e-05	0.000229016	0	3.81694e-05	0	3.81694e-05	0.000725219	0.000114508	7.63388e-05	0.000572541	0	k__Bacteria;p__Firmicutes;c__Bacilli;o__Staphylococcales;f__Staphylococcaceae;g__Jeotgalicoccus;
Intestinimonas	0.00145044	0.000801557	0.00148861	0.00305355	0.000114508	0.00221382	0.00389328	0	0	0	0	0.000877896	0.00194664	0.00114508	0.00122142	0.00240467	0.00122142	0.00145044	0.00225199	0.000152678	k__Bacteria;p__Firmicutes;c__Clostridia;o__Oscillospirales;f__Oscillospiraceae;g__Intestinimonas;
Prevotellaceae_NK3B31_group	0.000992404	0.000190847	0	0	0	0	0.000267186	0	0	0	0	7.63388e-05	0	0	0	0.00641246	0	0.000152678	0	0	k__Bacteria;p__Bacteroidota;c__Bacteroidia;o__Bacteroidales;f__Prevotellaceae;g__Prevotellaceae_NK3B31_group;
RB41	0	0	0	0	0	0	0	0.000496202	0.000419863	0.000534372	0.000496202	0.00366426	0	0	0	0	0	0	0	0	k__Bacteria;p__Acidobacteriota;c__Blastocatellia;o__Pyrinomonadales;f__Pyrinomonadaceae;g__RB41;
Allobaculum	0	0	0.0018703	0	0	0.00656514	0	0	0	0	0	0	0.0042368	0	0	0	0.0061071	0	0	0	k__Bacteria;p__Firmicutes;c__Bacilli;o__Erysipelotrichales;f__Erysipelotrichaceae;g__Allobaculum;
Capnocytophaga	0	0	0	0	0.000190847	0	0	0	0	0	0	0	0	0	0	0	0	0	0	3.81694e-05	k__Bacteria;p__Bacteroidota;c__Bacteroidia;o__Flavobacteriales;f__Flavobacteriaceae;g__Capnocytophaga;
Bacillus	0	7.63388e-05	0	0	0	3.81694e-05	3.81694e-05	0.000152678	0.000381694	7.63388e-05	0.000267186	0.000190847	0.000381694	0	0	0.000916065	0	0.000114508	0.00061071	0.000229016	k__Bacteria;p__Firmicutes;c__Bacilli;o__Bacillales;f__Bacillaceae;g__Bacillus;
Subdoligranulum	0	0	7.63388e-05	0.000687049	0.000916065	0	0	0	0	0	0	0.00148861	0	0	0	0	0.00148861	0.0018703	0	0.00217566	k__Bacteria;p__Firmicutes;c__Clostridia;o__Oscillospirales;f__Ruminococcaceae;g__Subdoligranulum;
Acidipila	0	0	0	0	0	0	0	0	0	0	0	0	0	0	0	0	0	0	0	0	k__Bacteria;p__Acidobacteriota;c__Acidobacteriae;o__Acidobacteriales;f__Acidobacteriaceae_(Subgroup_1);g__Acidipila;
[Eubacterium]_siraeum_group	0.000229016	0.000267186	0	3.81694e-05	0.000343525	0	0.000114508	0	0	0	0	0	0	0.000305355	0.000687049	0	0	0	0.000419863	0	k__Bacteria;p__Firmicutes;c__Clostridia;o__Oscillospirales;f__Ruminococcaceae;g__[Eubacterium]_siraeum_group;
Ruminococcus	0.00354975	0.000916065	0.00106874	0.00240467	0.00263369	0.00125959	0.00290087	0	0	0	0	0.00221382	0.000954235	0.00209932	0.00328257	0.000419863	0.00404596	0.00213749	0.00061071	0.000877896	k__Bacteria;p__Firmicutes;c__Clostridia;o__Oscillospirales;f__Ruminococcaceae;g__Ruminococcus;
Parvibacter	0.000419863	0.000229016	0.00133593	7.63388e-05	0.00232833	0.000954235	0.000992404	0.000190847	7.63388e-05	0.000267186	0.000114508	0.00061071	0.0018703	0.00061071	0.000343525	0.00061071	0.000687049	0.000916065	0.000305355	0.00141227	k__Bacteria;p__Actinobacteriota;c__Coriobacteriia;o__Coriobacteriales;f__Eggerthellaceae;g__Parvibacter;
unidentified_Clostridia_UCG-014	0	0	0	0	0.000152678	0	0	0	0	0	0	0	0	0	0	0	0	0	0	3.81694e-05	k__Bacteria;p__Firmicutes;c__Clostridia;o__Clostridia_UCG-014;f__unidentified_Clostridia_UCG-014;g__unidentified_Clostridia_UCG-014;
Rikenella	3.81694e-05	0.000114508	0.00179396	0.00580175	0.00064888	0.00488568	0.000916065	0	0	0	0	0.000229016	0.00064888	0.000458033	0.000496202	0.000114508	0.00129776	3.81694e-05	0.000114508	0.000114508	k__Bacteria;p__Bacteroidota;c__Bacteroidia;o__Bacteroidales;f__Rikenellaceae;g__Rikenella;
Solobacterium	0	0	0	7.63388e-05	0.000267186	0	0	0	0	0	0	0	0	0	0	0	0	0	0	0.000229016	k__Bacteria;p__Firmicutes;c__Bacilli;o__Erysipelotrichales;f__Erysipelotrichaceae;g__Solobacterium;
Rikenellaceae_RC9_gut_group	0.000419863	0.000152678	0.00064888	0.00179396	0.00171762	0.00164128	0	0	0	0	0	0.000763388	0.000458033	0.000267186	0.000190847	0	0.00122142	0.0013741	0.000343525	0.000152678	k__Bacteria;p__Bacteroidota;c__Bacteroidia;o__Bacteroidales;f__Rikenellaceae;g__Rikenellaceae_RC9_gut_group;
Anaeromyxobacter	0	0	0	0	0	0.0013741	0	0	3.81694e-05	0	0	3.81694e-05	0.00309172	0	0	0	0	0	0	0	k__Bacteria;p__Myxococcota;c__Myxococcia;o__Myxococcales;f__Anaeromyxobacteraceae;g__Anaeromyxobacter;
Parvimonas	0	0	0	0	0.000114508	0	0	0	0	0	0	0	0	0	0	0	0	0	0	0	k__Bacteria;p__Firmicutes;c__Clostridia;o__Peptostreptococcales-Tissierellales;f__unidentified_Peptostreptococcales-Tissierellales;g__Parvimonas;
Erysipelatoclostridium	0.00255735	0.00519104	7.63388e-05	3.81694e-05	7.63388e-05	0.0042368	0.00061071	0	0	0	0	0.000114508	0.000534372	0.00416046	0.000229016	3.81694e-05	0.00133593	0.00175579	0.00156495	7.63388e-05	k__Bacteria;p__Firmicutes;c__Bacilli;o__Erysipelotrichales;f__Erysipelatoclostridiaceae;g__Erysipelatoclostridium;
Bryobacter	0	0	0	0	0	7.63388e-05	0	0.000267186	0.000229016	0.000152678	0.000190847	0.00129776	0.000305355	0	0	0	0	0	0	0.000114508	k__Bacteria;p__Acidobacteriota;c__Acidobacteriae;o__Bryobacterales;f__Bryobacteraceae;g__Bryobacter;
Thiobacillus	0	0	0	0	0	0.00526738	0	0	0	0	0	0	0.00271003	0	0	0	0	0	0	0	k__Bacteria;p__Proteobacteria;c__Gammaproteobacteria;o__Burkholderiales;f__Hydrogenophilaceae;g__Thiobacillus;
unidentified_Chloroplast	7.63388e-05	0.000458033	0	0	0	0	3.81694e-05	0	0	0	0	3.81694e-05	0.000763388	3.81694e-05	0	0.000114508	3.81694e-05	0	3.81694e-05	0	k__Bacteria;p__Cyanobacteria;c__Cyanobacteriia;o__Chloroplast;f__unidentified_Chloroplast;g__unidentified_Chloroplast;
unidentified_Ruminococcaceae	0.000190847	3.81694e-05	0.000114508	0.00114508	0	0.000381694	0.000267186	0	0	0	0	0	0.000152678	3.81694e-05	0	7.63388e-05	0.000305355	0	0.000229016	0.000114508	k__Bacteria;p__unidentified_Bacteria;c__Clostridia;o__Oscillospirales;f__Ruminococcaceae;g__unidentified_Ruminococcaceae;
unidentified_Gemmatimonadaceae	0	0	0	0	0.000114508	3.81694e-05	0	3.81694e-05	0.000114508	3.81694e-05	0.000190847	0	0.000916065	0	0	0	0	0	0	0	k__Bacteria;p__unidentified_Bacteria;c__unidentified_Bacteria;o__Gemmatimonadales;f__Gemmatimonadaceae;g__unidentified_Gemmatimonadaceae;
Atopobium	0	0	0	0	0.000114508	0	0	0	0	0	0	0	0	0	0	0	0	0	0	0.000152678	k__Bacteria;p__Actinobacteriota;c__Coriobacteriia;o__Coriobacteriales;f__Atopobiaceae;g__Atopobium;
Gluconobacter	0	0	0	0	0	0	0	0	0	0	0	0	0	0	0	0	0	0	0	0	k__Bacteria;p__Proteobacteria;c__Alphaproteobacteria;o__Acetobacterales;f__Acetobacteraceae;g__Gluconobacter;
Butyricicoccus	0.000305355	0.000725219	0.000534372	0.00225199	7.63388e-05	0.000458033	0.000343525	0	0	7.63388e-05	0	0	0.000496202	0.000305355	0.000419863	0.000267186	0.00061071	3.81694e-05	0.000534372	0.000229016	k__Bacteria;p__Firmicutes;c__Clostridia;o__Oscillospirales;f__Butyricicoccaceae;g__Butyricicoccus;
Erysipelotrichaceae_UCG-003	0	0	0	0	0	0	0	0	0	0	0	0	0	0	0	0	0.000916065	0	0	3.81694e-05	k__Bacteria;p__Firmicutes;c__Bacilli;o__Erysipelotrichales;f__Erysipelatoclostridiaceae;g__Erysipelotrichaceae_UCG-003;
Sutterella	0	0	0	0	0	0	0	0	0	0	0	0.000458033	0	0	0	0	0.00446582	0.000229016	0	0	k__Bacteria;p__Proteobacteria;c__Gammaproteobacteria;o__Burkholderiales;f__Sutterellaceae;g__Sutterella;
UCG-002	0	0	0	0.00156495	0.0013741	0	0	0	0	0	0	0.00152678	0	0	0	0	0.000763388	0.000725219	0	0.00290087	k__Bacteria;p__Firmicutes;c__Clostridia;o__Oscillospirales;f__Oscillospiraceae;g__UCG-002;
Megasphaera	0	0	0	0.000190847	3.81694e-05	0	0	0	0.000839727	0	0	0.000343525	0	0	0	0	0	0.000381694	0	0	k__Bacteria;p__Firmicutes;c__Negativicutes;o__Veillonellales-Selenomonadales;f__Veillonellaceae;g__Megasphaera;
Chujaibacter	0	0	0	0	0	0	0	0	0	0	0	0	0	0	0	0	0	0	0	0	k__Bacteria;p__Proteobacteria;c__Gammaproteobacteria;o__Xanthomonadales;f__Rhodanobacteraceae;g__Chujaibacter;
Catonella	0	0	0	0	0.000114508	0	0	0	0	0	0	0	0	0	0	0	0	0	0	0	k__Bacteria;p__Firmicutes;c__Clostridia;o__Lachnospirales;f__Lachnospiraceae;g__Catonella;
Acidaminococcus	0	0	0	0	0	0	0	0	0	0	0	0	0	0	0	0	0	0	0	0	k__Bacteria;p__Firmicutes;c__Negativicutes;o__Acidaminococcales;f__Acidaminococcaceae;g__Acidaminococcus;
unidentified_Rhodospirillales	3.81694e-05	0	0	0	0	0	7.63388e-05	0	0	0	0	0	0	0.000190847	0	0.000114508	0	0	0	0	k__Bacteria;p__unidentified_Bacteria;c__Alphaproteobacteria;o__Rhodospirillales;f__unidentified_Rhodospirillales;g__unidentified_Rhodospirillales;
Peptostreptococcus	0	0	0	0	0	0	0	0	0	0	0	0	0	0	0	0	0	0	0	0.000152678	k__Bacteria;p__Firmicutes;c__Clostridia;o__Peptostreptococcales-Tissierellales;f__Peptostreptococcaceae;g__Peptostreptococcus;
Oribacterium	0	0	0	0	7.63388e-05	0	0	0	0	0	0	0	0	0	0	0	0	0	0	0.000152678	k__Bacteria;p__Firmicutes;c__Clostridia;o__Lachnospirales;f__Lachnospiraceae;g__Oribacterium;
unidentified_Ruminococcaceae	0.000381694	0	0.000229016	0.00156495	3.81694e-05	0.000152678	0.000267186	0	0.000419863	0	0	0	0.000763388	0.000152678	7.63388e-05	0	0.000496202	7.63388e-05	0	0.000152678	k__Bacteria;p__Firmicutes;c__Clostridia;o__unidentified_Clostridia;f__Ruminococcaceae;g__unidentified_Ruminococcaceae;
Sporosarcina	0	0.000114508	0	0	0	0	7.63388e-05	0.000267186	0.000114508	3.81694e-05	3.81694e-05	0	0	0	3.81694e-05	0.000190847	0	0	0	0	k__Bacteria;p__Firmicutes;c__Bacilli;o__Bacillales;f__Planococcaceae;g__Sporosarcina;
NK4A214_group	7.63388e-05	0	0.000190847	0.0013741	0.000687049	7.63388e-05	0.000152678	0	0	0	0	0.000801557	7.63388e-05	0.000114508	0	7.63388e-05	7.63388e-05	0.00064888	0.000305355	0.00122142	k__Bacteria;p__Firmicutes;c__Clostridia;o__Oscillospirales;f__Oscillospiraceae;g__NK4A214_group;
Haliangium	0	0	0	0	0	0.000267186	0	0.000267186	0.000267186	0.000305355	0.000114508	0.000152678	0.00110691	0	0	0	0	0	0	3.81694e-05	k__Bacteria;p__Myxococcota;c__Polyangia;o__Haliangiales;f__Haliangiaceae;g__Haliangium;
Johnsonella	0	0	0	0	0	0	0	0	0	0	0	0	0	0	0	0	0	0	0	0	k__Bacteria;p__Firmicutes;c__Clostridia;o__Lachnospirales;f__Lachnospiraceae;g__Johnsonella;
Selenomonas	0	0	0	0	0.000152678	0	0	0	0	0	0	0	0	0	0	0	0	0	0	0	k__Bacteria;p__Firmicutes;c__Negativicutes;o__Veillonellales-Selenomonadales;f__Selenomonadaceae;g__Selenomonas;
Geothermobacter	0	0	0	0	0	0.000229016	0	0	0	0	0	0	0.00259552	3.81694e-05	0	0	0	0	0	0	k__Bacteria;p__Desulfobacterota;c__Desulfuromonadia;o__unidentified_Desulfuromonadia;f__Geothermobacteraceae;g__Geothermobacter;
UCG-005	7.63388e-05	0.000152678	0.000190847	0.000954235	0.000839727	0.00061071	0.000152678	0	3.81694e-05	0	0	0.00110691	0.000267186	0.000114508	7.63388e-05	7.63388e-05	0.000687049	0.00106874	0.000419863	0.00103057	k__Bacteria;p__Firmicutes;c__Clostridia;o__Oscillospirales;f__Oscillospiraceae;g__UCG-005;
Anaerostipes	0	0	0	0	7.63388e-05	0	0	0	0	0	0	0	0	7.63388e-05	0	0	0.00316806	0	0	3.81694e-05	k__Bacteria;p__Firmicutes;c__Clostridia;o__Lachnospirales;f__Lachnospiraceae;g__Anaerostipes;
A2	0.00198481	0.00312989	0.000381694	0.000229016	0.000190847	0.000458033	0.000343525	3.81694e-05	3.81694e-05	0	0.000152678	0	7.63388e-05	0.00141227	0.00133593	7.63388e-05	0.000114508	0.000572541	0.000152678	3.81694e-05	k__Bacteria;p__Firmicutes;c__Clostridia;o__Lachnospirales;f__Lachnospiraceae;g__A2;
[Eubacterium]_eligens_group	0	0	0	0	0	0	0	0	0	0	0	0	0	0	0	0	0.00305355	0	0	0	k__Bacteria;p__Firmicutes;c__Clostridia;o__Lachnospirales;f__Lachnospiraceae;g__[Eubacterium]_eligens_group;
Gemmatimonas	0	0	0	0	0	3.81694e-05	0	0	0	3.81694e-05	0	0	7.63388e-05	0	0	0	0	0	0	0	k__Bacteria;p__Gemmatimonadetes;c__unidentified_Gemmatimonadetes;o__Gemmatimonadales;f__Gemmatimonadaceae;g__Gemmatimonas;
Ruminofilibacter	0	0	0	0	0	0	0	0	0	0	0	0	0	0	0	0	0	0	0	0.00221382	k__Bacteria;p__Bacteroidota;c__Bacteroidia;o__Bacteroidales;f__Marinilabiliaceae;g__Ruminofilibacter;
UBA1819	0.000152678	0	0.000152678	0.000152678	0.000419863	0.00271003	0.000877896	0	0	0	0	0.000229016	0.00293904	0.000229016	0.000267186	3.81694e-05	0.00225199	7.63388e-05	0	0.000725219	k__Bacteria;p__Firmicutes;c__Clostridia;o__Oscillospirales;f__Ruminococcaceae;g__UBA1819;
Pseudogracilibacillus	0	0	0	0	0	0	0	3.81694e-05	0.000114508	0	3.81694e-05	0	0	0	0	0	0	0	0	0	k__Bacteria;p__Firmicutes;c__Bacilli;o__Bacillales;f__Bacillaceae;g__Pseudogracilibacillus;
Thioalkalispira-Sulfurivermis	0	0	0	0	0	0.0028627	0	0	0	0	0	0	0.00282454	0	0	0	0	0	0	0	k__Bacteria;p__Proteobacteria;c__Gammaproteobacteria;o__Ectothiorhodospirales;f__Thioalkalispiraceae;g__Thioalkalispira-Sulfurivermis;
Leptotrichia	0	0	0	0	0.000229016	0	0	0	0	0	0	0	0	0	0	0	0	7.63388e-05	0	0.000496202	k__Bacteria;p__Fusobacteriota;c__Fusobacteriia;o__Fusobacteriales;f__Leptotrichiaceae;g__Leptotrichia;
Butyricimonas	0.000114508	0	3.81694e-05	0	3.81694e-05	3.81694e-05	0	0	0	0	0	0	0	0	0	0	0.00061071	0	7.63388e-05	3.81694e-05	k__Bacteria;p__Bacteroidota;c__Bacteroidia;o__Bacteroidales;f__Marinifilaceae;g__Butyricimonas;
Rodentibacter	0	0	0	0	0	3.81694e-05	0	0	0	0	0	0	3.81694e-05	0.000114508	0	0	7.63388e-05	0	0	0	k__Bacteria;p__Proteobacteria;c__Gammaproteobacteria;o__Pasteurellales;f__Pasteurellaceae;g__Rodentibacter;
Rhodanobacter	0	0	0	0	0	0	0	0	0	0	0	0	0	0	0	0	0	0	0	0	k__Bacteria;p__Proteobacteria;c__Gammaproteobacteria;o__Xanthomonadales;f__Rhodanobacteraceae;g__Rhodanobacter;
Lactococcus	7.63388e-05	0.000229016	0.00125959	3.81694e-05	0	0.00202298	7.63388e-05	0	3.81694e-05	0	0	0.000114508	0.000381694	3.81694e-05	0	3.81694e-05	0.000801557	0.00263369	0.000267186	0.000839727	k__Bacteria;p__Firmicutes;c__Bacilli;o__Lactobacillales;f__Streptococcaceae;g__Lactococcus;
Granulicatella	0	0	0	0	0	0	0	0	0	0	0	0	0	0	0	0	0	0	0	0	k__Bacteria;p__Firmicutes;c__Bacilli;o__Lactobacillales;f__Carnobacteriaceae;g__Granulicatella;
Tannerella	0	0	0	0	0.000687049	0	0	0	0	0	0	0	0	0	0	0	0	0	0	0	k__Bacteria;p__Bacteroidota;c__Bacteroidia;o__Bacteroidales;f__Tannerellaceae;g__Tannerella;
MND1	0	0	3.81694e-05	0	0	0.000801557	0	0.000687049	0.000572541	0.000687049	0.00064888	0	0.00145044	0	0	0	0	0	0	0.000267186	k__Bacteria;p__Proteobacteria;c__Gammaproteobacteria;o__Burkholderiales;f__Nitrosomonadaceae;g__MND1;
unidentified_[Eubacterium]_coprostanoligenes_group	0	0	0	0	0.000839727	0	0	0	0	0	0	0.000687049	0	0	0	0	0	0.000916065	0	0.000419863	k__Bacteria;p__Firmicutes;c__Clostridia;o__Oscillospirales;f__[Eubacterium]_coprostanoligenes_group;g__unidentified_[Eubacterium]_coprostanoligenes_group;
Holdemanella	0	0	0	3.81694e-05	0	0	0	0	0	0	0	0.000190847	0	0	0	0	0.000419863	7.63388e-05	0	0.000267186	k__Bacteria;p__Firmicutes;c__Bacilli;o__Erysipelotrichales;f__Erysipelotrichaceae;g__Holdemanella;
Moraxella	0	0	0	0	0	0	0	0	0	0	0	7.63388e-05	0	0	0	0.000114508	0	3.81694e-05	0	0	k__Bacteria;p__Proteobacteria;c__Gammaproteobacteria;o__Pseudomonadales;f__Moraxellaceae;g__Moraxella;
Dongia	0	0	0	0	0	0.000114508	0	0.000229016	0.000114508	0.000152678	0.000229016	0	7.63388e-05	0	0	0	0	0	0	0	k__Bacteria;p__Proteobacteria;c__Alphaproteobacteria;o__Dongiales;f__Dongiaceae;g__Dongia;
Chthoniobacter	0	0	0	0	0	0	0	0	0	3.81694e-05	0	0	0	0	0	0	0	0	0	0	k__Bacteria;p__Verrucomicrobiota;c__Verrucomicrobiae;o__Chthoniobacterales;f__Chthoniobacteraceae;g__Chthoniobacter;
[Eubacterium]_hallii_group	0	0	3.81694e-05	0.000534372	0.000534372	0	0	0	0	0	0	0	0	0	0	0	0.00156495	0	0	0.000687049	k__Bacteria;p__Firmicutes;c__Clostridia;o__Lachnospirales;f__Lachnospiraceae;g__[Eubacterium]_hallii_group;
Aeromonas	0	0	0	0	3.81694e-05	3.81694e-05	0	0	0	0	0	0	0	0	0	0	3.81694e-05	0	0	0	k__Bacteria;p__Proteobacteria;c__Gammaproteobacteria;o__Aeromonadales;f__Aeromonadaceae;g__Aeromonas;
Gaiella	0	0	0	0	0	0.000305355	0	0.000229016	0.000114508	0.000114508	0.000496202	0	0.000267186	0	0	0	0	0	0	0.00064888	k__Bacteria;p__Actinobacteriota;c__Thermoleophilia;o__Gaiellales;f__Gaiellaceae;g__Gaiella;
Sarcina	0	0	0	0	3.81694e-05	0	0	0	0	0	0	0	0	0	0	0	0	0	0	0	k__Bacteria;p__Firmicutes;c__Clostridia;o__Clostridiales;f__Clostridiaceae;g__Sarcina;
Providencia	0	0	0	0	0	0	0	0	0	0	0	0	0	0	0	0	0	0	0	0	k__Bacteria;p__Proteobacteria;c__Gammaproteobacteria;o__Enterobacterales;f__Morganellaceae;g__Providencia;
Lachnospira	0	0	0	3.81694e-05	0	0	0	0	0	0	3.81694e-05	0	0	0	0	0	0.00217566	0	0	0	k__Bacteria;p__Firmicutes;c__Clostridia;o__Lachnospirales;f__Lachnospiraceae;g__Lachnospira;
Butyrivibrio	0	0	0	0	0	0	0	0	0	0	0	0	0	0	0	0	0	0	0	0	k__Bacteria;p__Firmicutes;c__Clostridia;o__Lachnospirales;f__Lachnospiraceae;g__Butyrivibrio;
Flavisolibacter	0	0	0	0	0	0	0	0	3.81694e-05	0	3.81694e-05	3.81694e-05	3.81694e-05	0	0	0	0	0	0	0	k__Bacteria;p__Bacteroidota;c__Bacteroidia;o__Chitinophagales;f__Chitinophagaceae;g__Flavisolibacter;
Halomonas	0	0	0	0	0.000114508	0	0	0	0	0	0	0	0	0	0	0	0	3.81694e-05	0	3.81694e-05	k__Bacteria;p__Proteobacteria;c__Gammaproteobacteria;o__Oceanospirillales;f__Halomonadaceae;g__Halomonas;
Phenylobacterium	0	0	0	3.81694e-05	0.000114508	0	0	3.81694e-05	0	0.000114508	3.81694e-05	0.000152678	7.63388e-05	0	0	0	0	0	0	0	k__Bacteria;p__Proteobacteria;c__Alphaproteobacteria;o__Caulobacterales;f__Caulobacteraceae;g__Phenylobacterium;
Hydrogenophilus	0	0	0	0	0	0.000114508	0	0	0	0	0	0	0.000114508	0	0	0	0	0	0	0.000152678	k__Bacteria;p__Proteobacteria;c__Gammaproteobacteria;o__Burkholderiales;f__Hydrogenophilaceae;g__Hydrogenophilus;
Fusicatenibacter	0	0	0	0	0	0	0	0	0	0	0	0	0	0	0	0	0.00198481	0	0	0	k__Bacteria;p__Firmicutes;c__Clostridia;o__Lachnospirales;f__Lachnospiraceae;g__Fusicatenibacter;
Rheinheimera	0	0	0	0	0	0	0	0	0	0	0	0	0	0	0	0	0	0	0	0	k__Bacteria;p__Proteobacteria;c__Gammaproteobacteria;o__Alteromonadales;f__Alteromonadaceae;g__Rheinheimera;
Skermanella	0	0	0	0	0	0	0	0	0.000114508	0	3.81694e-05	0.000152678	0	0	0	0	0	0	0	0	k__Bacteria;p__Proteobacteria;c__Alphaproteobacteria;o__Azospirillales;f__Azospirillaceae;g__Skermanella;
Candidatus_Solibacter	0	0	0	0	0	0.000114508	0	0	7.63388e-05	3.81694e-05	0	0	0.000190847	0	0	0	0	0	0	0	k__Bacteria;p__Acidobacteriota;c__Acidobacteriae;o__Solibacterales;f__Solibacteraceae;g__Candidatus_Solibacter;
unidentified_Absconditabacteriales_(SR1)	0	0	0	0	0	0	0	0	0	0	0	0	0	0	0	0	0	0	0	0	k__Bacteria;p__Gracilibacteria;c__unidentified_Gracilibacteria;o__Absconditabacteriales_(SR1);f__unidentified_Absconditabacteriales_(SR1);g__unidentified_Absconditabacteriales_(SR1);
Angustibacter	0	0	0	0	0	0	0	0	0	0	0	0.000152678	0	0	0	0	0	0	0	0	k__Bacteria;p__Actinobacteriota;c__Actinobacteria;o__Kineosporiales;f__Kineosporiaceae;g__Angustibacter;
Bilophila	0.0018703	0.00152678	0.000458033	0.000877896	0	0.000381694	0.000267186	0	0	0	0	0.000343525	0.000305355	0.00064888	0.000801557	0.000114508	0.000114508	0.000190847	0.00103057	3.81694e-05	k__Bacteria;p__Desulfobacterota;c__Desulfovibrionia;o__Desulfovibrionales;f__Desulfovibrionaceae;g__Bilophila;
unidentified_DTB120	0	0	0	0	0	0.000419863	0	0	0	0	0	0	0	0	0	0	0	0	0	0	k__Bacteria;p__DTB120;c__unidentified_DTB120;o__unidentified_DTB120;f__unidentified_DTB120;g__unidentified_DTB120;
Rubrobacter	0	0	0	0	0	0	0	7.63388e-05	3.81694e-05	3.81694e-05	7.63388e-05	0.000229016	0	0	0	0	0	0	0	0	k__Bacteria;p__Actinobacteriota;c__Rubrobacteria;o__Rubrobacterales;f__Rubrobacteriaceae;g__Rubrobacter;
Candidatus_Stoquefichus	0	0	0	0	0	7.63388e-05	0	0	0	0	0	0	0	0	0	0	0	0	0	0	k__Bacteria;p__Firmicutes;c__Bacilli;o__Erysipelotrichales;f__Erysipelatoclostridiaceae;g__Candidatus_Stoquefichus;
GCA-900066575	0.00148861	0.00179396	0.000190847	0.00103057	0	0.000687049	0.000839727	0.000152678	0	0	0	0	0.00125959	0.000763388	0.000763388	0.000305355	0.000954235	3.81694e-05	0.000496202	0.000496202	k__Bacteria;p__Firmicutes;c__Clostridia;o__Lachnospirales;f__Lachnospiraceae;g__GCA-900066575;
Weissella	0	0	0	0	0	3.81694e-05	0	0	0	0	3.81694e-05	0	0	7.63388e-05	0	0	0.000572541	0	0	0	k__Bacteria;p__Firmicutes;c__Bacilli;o__Lactobacillales;f__Leuconostocaceae;g__Weissella;
[Eubacterium]_brachy_group	0.000114508	0.000229016	0.00061071	0.00160311	0.00171762	0.000190847	3.81694e-05	7.63388e-05	0	3.81694e-05	3.81694e-05	0.000419863	0.000381694	0.000229016	3.81694e-05	0.000152678	0.000229016	0	7.63388e-05	0.000229016	k__Bacteria;p__Firmicutes;c__Clostridia;o__Peptostreptococcales-Tissierellales;f__Anaerovoracaceae;g__[Eubacterium]_brachy_group;
Microlunatus	0	0	0	0	0	0	0	0	0	0	0	0	0	0	0	0	0	0	0	0	k__Bacteria;p__Actinobacteriota;c__Actinobacteria;o__Propionibacteriales;f__Propionibacteriaceae;g__Microlunatus;
Acetitomaculum	0	0	0	0	0	0	0	0	0	0	0	0	0	0	0	0	0	0	0	0	k__Bacteria;p__Firmicutes;c__Clostridia;o__Lachnospirales;f__Lachnospiraceae;g__Acetitomaculum;
Ellin6067	0	0	0	0	0	3.81694e-05	0	3.81694e-05	3.81694e-05	0.000229016	3.81694e-05	0	0.00118325	0	0	0	0	0	0	0	k__Bacteria;p__Proteobacteria;c__Gammaproteobacteria;o__Burkholderiales;f__Nitrosomonadaceae;g__Ellin6067;
Harryflintia	0	3.81694e-05	0.000572541	7.63388e-05	0	0.00110691	0.000190847	0	0	0	0	0	0.000152678	7.63388e-05	0	0	0.000190847	0	0.000152678	0	k__Bacteria;p__Firmicutes;c__Clostridia;o__Oscillospirales;f__Ruminococcaceae;g__Harryflintia;
Streptomyces	0	0	3.81694e-05	0	0	0.000190847	0	3.81694e-05	7.63388e-05	0.000152678	3.81694e-05	0.000114508	0.000190847	0	0	0	0	0	0	7.63388e-05	k__Bacteria;p__Actinobacteriota;c__Actinobacteria;o__Streptomycetales;f__Streptomycetaceae;g__Streptomyces;
Collinsella	0	0	0	0.000114508	0.000114508	3.81694e-05	0	0	0	0	0	0.000381694	0	0	7.63388e-05	0	0.000419863	7.63388e-05	0	3.81694e-05	k__Bacteria;p__Actinobacteriota;c__Coriobacteriia;o__Coriobacteriales;f__Coriobacteriaceae;g__Collinsella;
Methanobrevibacter	0	0	0	0.000267186	0.000763388	0	0	0	0	0	0	7.63388e-05	0	0	0	0	0	0.000229016	0	0.000687049	k__Archaea;p__Euryarchaeota;c__Methanobacteria;o__Methanobacteriales;f__Methanobacteriaceae;g__Methanobrevibacter;
unidentified_Saccharimonadales	0	0	0	0	0	0	0	0	0	0	0	0	0	0	0	3.81694e-05	0	0	0	0	k__Bacteria;p__unidentified_Bacteria;c__Saccharimonadia;o__Saccharimonadales;f__unidentified_Saccharimonadales;g__unidentified_Saccharimonadales;
Barnesiella	0	0	0	0.000114508	0	0	3.81694e-05	0	0	0	0	0	0	3.81694e-05	0	3.81694e-05	0.00156495	0	0	7.63388e-05	k__Bacteria;p__Bacteroidota;c__Bacteroidia;o__Bacteroidales;f__Barnesiellaceae;g__Barnesiella;
Mizugakiibacter	0	0	0	0	0	0	0	0	0	0	0	0	0	0	0	0	0	0	0	0	k__Bacteria;p__Proteobacteria;c__Gammaproteobacteria;o__Xanthomonadales;f__Rhodanobacteraceae;g__Mizugakiibacter;
Nitrosomonas	0	0	0	0	0	0.000267186	0	0	0	0	0	0	0	0	0	0	0	0	0	7.63388e-05	k__Bacteria;p__Proteobacteria;c__Gammaproteobacteria;o__Burkholderiales;f__Nitrosomonadaceae;g__Nitrosomonas;
Lysobacter	0	0	0	0	0	3.81694e-05	0	0.000152678	7.63388e-05	3.81694e-05	7.63388e-05	3.81694e-05	3.81694e-05	0	0	0	0	0	0	0	k__Bacteria;p__Proteobacteria;c__Gammaproteobacteria;o__Xanthomonadales;f__Xanthomonadaceae;g__Lysobacter;
Aliidiomarina	0	0	7.63388e-05	0	0	0	0	0	0	0	0	0	0	0	0	0	0.000152678	0	0	3.81694e-05	k__Bacteria;p__Proteobacteria;c__Gammaproteobacteria;o__Alteromonadales;f__Idiomarinaceae;g__Aliidiomarina;
Luteimonas	0	0	0	0	0	0	0	0	0	0	0	0	0	0	0	0	0	0	0	0	k__Bacteria;p__Proteobacteria;c__Gammaproteobacteria;o__Xanthomonadales;f__Xanthomonadaceae;g__Luteimonas;
Phascolarctobacterium	0	0	0	0.000152678	0	0	0	0	0	0	0	0.000267186	0	0	0	0	0.000381694	0	0	0	k__Bacteria;p__Firmicutes;c__Negativicutes;o__Acidaminococcales;f__Acidaminococcaceae;g__Phascolarctobacterium;
Mycoplasma	0	0	0	0	0	0	0	0	0	0	0	0	0	0	0	0	0	0	0	3.81694e-05	k__Bacteria;p__Firmicutes;c__Bacilli;o__Mycoplasmatales;f__Mycoplasmataceae;g__Mycoplasma;
Chryseobacterium	0	0	0	0	0	0	0	0	0	0	0	0	0	0	0	0	0	0.000114508	0	0	k__Bacteria;p__Bacteroidota;c__Bacteroidia;o__Flavobacteriales;f__Weeksellaceae;g__Chryseobacterium;
OLB8	0	0	0	0	0	0	0	0	0	0	0	0	0	0	0	0	0	0	0	0	k__Bacteria;p__Bacteroidota;c__Bacteroidia;o__Chitinophagales;f__Saprospiraceae;g__OLB8;
Steroidobacter	0	0	0	0	0	0	0	0.000152678	0.000190847	0.000114508	0.000190847	0.000190847	0.000229016	0	0	0	0	0	0	0.000114508	k__Bacteria;p__Proteobacteria;c__Gammaproteobacteria;o__Steroidobacterales;f__Steroidobacteraceae;g__Steroidobacter;
Acetobacter	0	0	0	0	0	0	0	0	0	0	0	0	0	0	0	0	0	0	0	0	k__Bacteria;p__Proteobacteria;c__Alphaproteobacteria;o__Acetobacterales;f__Acetobacteraceae;g__Acetobacter;
Blastococcus	0	0	0	7.63388e-05	0	0	0	3.81694e-05	7.63388e-05	0.000152678	7.63388e-05	0.000419863	0	0	0	0	0	0	0	3.81694e-05	k__Bacteria;p__Actinobacteriota;c__Actinobacteria;o__Frankiales;f__Geodermatophilaceae;g__Blastococcus;
Flavitalea	0	0	0	0	0	0	0	3.81694e-05	3.81694e-05	3.81694e-05	0.000152678	0	0	0	0	0	0	0	0	0	k__Bacteria;p__Bacteroidota;c__Bacteroidia;o__Chitinophagales;f__Chitinophagaceae;g__Flavitalea;
Acidibacter	0	0	0	0	0	0	0	7.63388e-05	7.63388e-05	0	0.000229016	0.000152678	0.000190847	0	0	0	0	0	0	0	k__Bacteria;p__Proteobacteria;c__Gammaproteobacteria;o__unidentified_Gammaproteobacteria;f__unidentified_Gammaproteobacteria;g__Acidibacter;
Proteus	0	3.81694e-05	0.000801557	0	0	0.00064888	0	0	0	0	0	0	0.00125959	0	0	0	0.00061071	0	0	0	k__Bacteria;p__Proteobacteria;c__Gammaproteobacteria;o__Enterobacterales;f__Morganellaceae;g__Proteus;
Sulfurifustis	0	0	0	0	0	0.00106874	0	0	0	0	0	0	0	0	0	0	0	0	0	0	k__Bacteria;p__Proteobacteria;c__Gammaproteobacteria;o__Acidiferrobacterales;f__Acidiferrobacteraceae;g__Sulfurifustis;
Pyramidobacter	0	0	0	3.81694e-05	7.63388e-05	0	0	0	0	0	0	0.000763388	0	0	0	0	0	0.000419863	0	0	k__Bacteria;p__Synergistota;c__Synergistia;o__Synergistales;f__Synergistaceae;g__Pyramidobacter;
Bradyrhizobium	0	0	0.000152678	0	0	0	0	0	0	0	3.81694e-05	7.63388e-05	3.81694e-05	0	0	0	0	0	0	7.63388e-05	k__Bacteria;p__Proteobacteria;c__Alphaproteobacteria;o__Rhizobiales;f__Xanthobacteraceae;g__Bradyrhizobium;
Edaphobaculum	0	0	0	0	0	0	0	0	0	0	0	0	3.81694e-05	0	0	0	0	0	0	7.63388e-05	k__Bacteria;p__Bacteroidota;c__Bacteroidia;o__Chitinophagales;f__Chitinophagaceae;g__Edaphobaculum;
Microvirga	0	0	0	0	0	0	0	0	3.81694e-05	3.81694e-05	0.000114508	0.000992404	3.81694e-05	0	0	0	0	0	0	3.81694e-05	k__Bacteria;p__Proteobacteria;c__Alphaproteobacteria;o__Rhizobiales;f__Beijerinckiaceae;g__Microvirga;
Lawsonella	0	0	0	0	0	0	0	0	3.81694e-05	0	0	0	0	0	0	0	0	0	0	0	k__Bacteria;p__Actinobacteriota;c__Actinobacteria;o__Corynebacteriales;f__Corynebacteriaceae;g__Lawsonella;
Nesterenkonia	0	0	0	0	0	0	0	3.81694e-05	0	0.000190847	3.81694e-05	0	0	0	0	0	0	0	0	0	k__Bacteria;p__Actinobacteriota;c__Actinobacteria;o__Micrococcales;f__Micrococcaceae;g__Nesterenkonia;
MIZ17	0	0	0	0	0	0	0	3.81694e-05	0	3.81694e-05	0	0	0	0	0	0	0	0	0	0.00118325	k__Bacteria;p__Methylomirabilota;c__Methylomirabilia;o__Methylomirabilales;f__Methylomirabilaceae;g__MIZ17;
UTCFX1	0	0	0	0	0	3.81694e-05	0	3.81694e-05	3.81694e-05	0	3.81694e-05	0	0.000114508	0	0	0	0	0	0	0	k__Bacteria;p__Chloroflexi;c__Anaerolineae;o__Anaerolineales;f__Anaerolineaceae;g__UTCFX1;
[Eubacterium]_fissicatena_group	0.000114508	0.000114508	3.81694e-05	0	0	0	0	0	0	0	0	0	0	0.000229016	0	0	0	0.000763388	0.000190847	3.81694e-05	k__Bacteria;p__Firmicutes;c__Clostridia;o__Lachnospirales;f__Lachnospiraceae;g__[Eubacterium]_fissicatena_group;
Bergeyella	0	0	0	0	0	0	0	0	0	0	0	0	0	0	0	0	0	0	0	0	k__Bacteria;p__Bacteroidota;c__Bacteroidia;o__Flavobacteriales;f__Weeksellaceae;g__Bergeyella;
Anaeroglobus	0	0	0	0	0	0	0	0	0	0	0	0	0	0	0	0	0	0	0	0	k__Bacteria;p__Firmicutes;c__Negativicutes;o__Veillonellales-Selenomonadales;f__Veillonellaceae;g__Anaeroglobus;
Solirubrobacter	0	0	0	0	0	0	0	3.81694e-05	3.81694e-05	7.63388e-05	7.63388e-05	0.000114508	7.63388e-05	0	0	0	0	0	0	0	k__Bacteria;p__Actinobacteriota;c__Thermoleophilia;o__Solirubrobacterales;f__Solirubrobacteraceae;g__Solirubrobacter;
Marmoricola	0	0	0	0	0	0.000725219	0	0.000114508	7.63388e-05	0	0	3.81694e-05	3.81694e-05	0	0	0	0	0	0	0	k__Bacteria;p__Actinobacteriota;c__Actinobacteria;o__Propionibacteriales;f__Nocardioidaceae;g__Marmoricola;
F0058	0	0	0	0	0	0	0	0	0	0	0	0	0	0	0	0	0	0	0	0	k__Bacteria;p__Bacteroidota;c__Bacteroidia;o__Bacteroidales;f__Paludibacteraceae;g__F0058;
Deferrisoma	0	0	0	0	0	7.63388e-05	0	0	0	0	0	0	0.000687049	0	0	0	0	0	0	0	k__Bacteria;p__Deferrisomatota;c__Defferrisomatia;o__Defferrisomatales;f__Defferrisomataceae;g__Deferrisoma;
Candidatus_Tenderia	0	0	0	0	0	0	0	0	0	0	0	0	0.00110691	0	0	0	0	0	0	0	k__Bacteria;p__Proteobacteria;c__Gammaproteobacteria;o__Tenderiales;f__Tenderiaceae;g__Candidatus_Tenderia;
Nitrolancea	0	0	0	0	0	0	0	0	0	0	0	0	0	0	0	0	0	0	0	0	k__Bacteria;p__Chloroflexi;c__Chloroflexia;o__Thermomicrobiales;f__Thermomicrobiaceae;g__Nitrolancea;
Ramlibacter	0	0	0	0	3.81694e-05	0.000152678	0	7.63388e-05	0	3.81694e-05	0	0.000152678	0.000152678	0	0	0	0	0	0	7.63388e-05	k__Bacteria;p__Proteobacteria;c__Gammaproteobacteria;o__Burkholderiales;f__Comamonadaceae;g__Ramlibacter;
[Eubacterium]_yurii_group	0	0	0	0	0	0	0	0	0	0	0	0	0	0	0	0	0	0	0	0	k__Bacteria;p__Firmicutes;c__Clostridia;o__Peptostreptococcales-Tissierellales;f__Peptostreptococcaceae;g__[Eubacterium]_yurii_group;
Thiopseudomonas	0	0	0	0	0	0	0	0	0	0	0	0	0	0	0	0	0	0	0	0	k__Bacteria;p__Proteobacteria;c__Gammaproteobacteria;o__Pseudomonadales;f__Pseudomonadaceae;g__Thiopseudomonas;
Olsenella	0	0	0	3.81694e-05	0	0	0	0	0	0	0	3.81694e-05	0.000419863	0	0.000152678	0	0	7.63388e-05	0	7.63388e-05	k__Bacteria;p__Actinobacteriota;c__Coriobacteriia;o__Coriobacteriales;f__Atopobiaceae;g__Olsenella;
Brevundimonas	0	0	0	0	0	0	0	0	3.81694e-05	7.63388e-05	0	3.81694e-05	0	0	0	0	0	0	0	0	k__Bacteria;p__Proteobacteria;c__Alphaproteobacteria;o__Caulobacterales;f__Caulobacteraceae;g__Brevundimonas;
Pantoea	0	0	0	0	0	0	0	0	0	0	0	0	0	0	0	0	0	0	0	0	k__Bacteria;p__Proteobacteria;c__Gammaproteobacteria;o__Enterobacterales;f__Erwiniaceae;g__Pantoea;
Paenibacillus	0	0	0	0	0	0	0	7.63388e-05	3.81694e-05	0	0.000114508	0	0	0	0	0	0	0	0	0.000114508	k__Bacteria;p__Firmicutes;c__Bacilli;o__Paenibacillales;f__Paenibacillaceae;g__Paenibacillus;
SCGC-AB-539-J10	0	0	0	0	0	3.81694e-05	0	0	0	0	0	0	0	0	0	0	0	0.00103057	0	0	k__Bacteria;p__Chloroflexi;c__Dehalococcoidia;o__GIF9;f__AB-539-J10;g__SCGC-AB-539-J10;
Centipeda	0	0	0	0	0	0	0	0	0	0	0	0	0	0	0	0	0	0	0	0	k__Bacteria;p__Firmicutes;c__Negativicutes;o__Veillonellales-Selenomonadales;f__Selenomonadaceae;g__Centipeda;
Amnipila	0	0	0	0	0	0	0	0	0	0	0	0	0	0	0	0	0	0	0	0	k__Bacteria;p__Firmicutes;c__Clostridia;o__Peptostreptococcales-Tissierellales;f__Anaerovoracaceae;g__Amnipila;
Lachnospiraceae_ND3007_group	0	0	0	0	0	0	0	0	0	0	0	0	3.81694e-05	0	0	0	0.000992404	0	0	0	k__Bacteria;p__Firmicutes;c__Clostridia;o__Lachnospirales;f__Lachnospiraceae;g__Lachnospiraceae_ND3007_group;
UCG-009	0.000152678	0.000190847	0.000152678	0.000992404	3.81694e-05	0.000190847	0.000190847	0	0	0	0	0	0.000190847	0.000305355	0.000152678	0	0.000190847	0	0.000114508	0	k__Bacteria;p__Firmicutes;c__Clostridia;o__Oscillospirales;f__Butyricicoccaceae;g__UCG-009;
Facklamia	0	0	0	0	0	0	0.000190847	0	0	0	0	0	0	0	0.000152678	0.000343525	0	0	0.000114508	0	k__Bacteria;p__Firmicutes;c__Bacilli;o__Lactobacillales;f__Aerococcaceae;g__Facklamia;
Robiginitalea	0	0	0	0	0	0	0	0	0	0	0	0	0.000954235	0	0	0	0	0	0	0	k__Bacteria;p__Bacteroidota;c__Bacteroidia;o__Flavobacteriales;f__Flavobacteriaceae;g__Robiginitalea;
Cloacibacillus	0	0	0	0.000152678	0.000496202	0	0	0	0	0	0	0.000496202	0	0	0	0	0	0.000343525	0	0	k__Bacteria;p__Synergistota;c__Synergistia;o__Synergistales;f__Synergistaceae;g__Cloacibacillus;
Aerococcus	0	0	0	0	3.81694e-05	0	3.81694e-05	0	0	0	0	0	0	0	0	0	7.63388e-05	0	0	0	k__Bacteria;p__Firmicutes;c__Bacilli;o__Lactobacillales;f__Aerococcaceae;g__Aerococcus;
Ohtaekwangia	0	0	0	0	0	0	0	0	0	3.81694e-05	0	0	7.63388e-05	0	0	0	0	0	0	0	k__Bacteria;p__Bacteroidota;c__Bacteroidia;o__Cytophagales;f__Microscillaceae;g__Ohtaekwangia;
Treponema	0	0	0	0	7.63388e-05	0	0	0	0	0	0	3.81694e-05	0	0	0	0	0	0.000114508	0	0	k__Bacteria;p__Spirochaetota;c__Spirochaetia;o__Spirochaetales;f__Spirochaetaceae;g__Treponema;
Peptococcus	0	0	0	0.000190847	0.000190847	0	3.81694e-05	0	0	0	0	0.000114508	0	3.81694e-05	0.000114508	0.000114508	7.63388e-05	0.000114508	0	0.000267186	k__Bacteria;p__Firmicutes;c__Clostridia;o__Peptococcales;f__Peptococcaceae;g__Peptococcus;
unidentified_Gaiellales	0	0	0	0	0	0	0	0	0	0	0	0	0.000114508	0	0	0	0	0	0	0	k__Bacteria;p__unidentified_Bacteria;c__Thermoleophilia;o__Gaiellales;f__unidentified_Gaiellales;g__unidentified_Gaiellales;
Aquicella	0	0	0	0	0	0	0	0.000152678	3.81694e-05	0	0.000114508	0	3.81694e-05	0	0	0	0	0	0	0	k__Bacteria;p__Proteobacteria;c__Gammaproteobacteria;o__Diplorickettsiales;f__Diplorickettsiaceae;g__Aquicella;
Thermus	0.000763388	0.000877896	0	0	0	0	0	0	0	0	0	0	0	7.63388e-05	3.81694e-05	0	0	0	0	3.81694e-05	k__Bacteria;p__Deinococcota;c__Deinococci;o__Thermales;f__Thermaceae;g__Thermus;
Flavobacterium	0	0	0	0	0	0	7.63388e-05	0	0	0	0	0	3.81694e-05	0	0.000114508	0	0	0	0	0	k__Bacteria;p__Bacteroidota;c__Bacteroidia;o__Flavobacteriales;f__Flavobacteriaceae;g__Flavobacterium;
Tuzzerella	0.000267186	0.000229016	0.000190847	0.000229016	0	0.000229016	0.000305355	0	0	0	0	0.000267186	0.00064888	0.000534372	0.000267186	0.000229016	0.000534372	0.000381694	3.81694e-05	0.000190847	k__Bacteria;p__Firmicutes;c__Clostridia;o__Lachnospirales;f__Lachnospiraceae;g__Tuzzerella;
Actinoplanes	0	0	0	0	0	0.000114508	0	7.63388e-05	0	0	0.000114508	0.000839727	3.81694e-05	0	0	0	0	0	0	0.000114508	k__Bacteria;p__Actinobacteriota;c__Actinobacteria;o__Micromonosporales;f__Micromonosporaceae;g__Actinoplanes;
Limibaculum	0	0	0	0	0	0	0	0	0	0	0	0	0.000496202	0	0	0	0	0	0	0	k__Bacteria;p__Proteobacteria;c__Alphaproteobacteria;o__Rhodobacterales;f__Rhodobacteraceae;g__Limibaculum;
Coprococcus	0	0	0	7.63388e-05	0	0	0	0	0	0	0	0	0	0	0	0	0.000152678	0	0	3.81694e-05	k__Bacteria;p__Firmicutes;c__Clostridia;o__Lachnospirales;f__Lachnospiraceae;g__Coprococcus;
Lautropia	0	0	0	0	3.81694e-05	0	0	0	0	0	0	0	0	0	0	0	0	0	0	3.81694e-05	k__Bacteria;p__Proteobacteria;c__Gammaproteobacteria;o__Burkholderiales;f__Burkholderiaceae;g__Lautropia;
Tyzzerella	0	0	3.81694e-05	0.000267186	7.63388e-05	7.63388e-05	3.81694e-05	3.81694e-05	0	0	0	0	0.000190847	7.63388e-05	3.81694e-05	0	0.000229016	0	3.81694e-05	3.81694e-05	k__Bacteria;p__Firmicutes;c__Clostridia;o__Lachnospirales;f__Lachnospiraceae;g__Tyzzerella;
Nitrosospira	0	0	0	0	0	0	0	3.81694e-05	0	0	3.81694e-05	0	0	0	0	0	0	0	0	3.81694e-05	k__Bacteria;p__Proteobacteria;c__Gammaproteobacteria;o__Burkholderiales;f__Nitrosomonadaceae;g__Nitrosospira;
Castellaniella	0	0	0	0	0	0	0	0	0	0	0	0	0	0	0	0	0	0	0	0	k__Bacteria;p__Proteobacteria;c__Gammaproteobacteria;o__Burkholderiales;f__Alcaligenaceae;g__Castellaniella;
Actinobacillus	0	0	0	0	0	0	0	0	0	0	0	3.81694e-05	0	0	0	0	0	0.000267186	0	0	k__Bacteria;p__Proteobacteria;c__Gammaproteobacteria;o__Pasteurellales;f__Pasteurellaceae;g__Actinobacillus;
unidentified_Selenomonadaceae	0	0	0	0	0	0	0	0	0	0	0	0	0	0	0	0	0	0	0	0	k__Bacteria;p__unidentified_Bacteria;c__Negativicutes;o__Veillonellales-Selenomonadales;f__Selenomonadaceae;g__unidentified_Selenomonadaceae;
Aggregatibacter	0	0	0	0	0	0	0	0	0	0	0	0	0	0	0	0	0	0	0	0	k__Bacteria;p__Proteobacteria;c__Gammaproteobacteria;o__Pasteurellales;f__Pasteurellaceae;g__Aggregatibacter;
ASF356	0.000267186	0.000190847	0.000114508	0.000152678	0.000496202	0.000419863	0.00064888	0.000114508	0	0	0	0	0.000152678	0.000763388	0.00064888	7.63388e-05	0.000114508	0.000305355	0.000305355	3.81694e-05	k__Bacteria;p__Firmicutes;c__Clostridia;o__Lachnospirales;f__Lachnospiraceae;g__ASF356;
Nonomuraea	0	0	0	0	3.81694e-05	0	0	0	0	0	0	0	0	0	0	0	0	0	0	3.81694e-05	k__Bacteria;p__Actinobacteriota;c__Actinobacteria;o__Streptosporangiales;f__Streptosporangiaceae;g__Nonomuraea;
Pseudoclavibacter	0	0	0	0	0	0	0	0	0	0	0	0	0	0	0	0	0	0	0	0	k__Bacteria;p__Actinobacteriota;c__Actinobacteria;o__Micrococcales;f__Microbacteriaceae;g__Pseudoclavibacter;
Reyranella	0	0	0	0	0.000114508	7.63388e-05	0	0.000114508	0.000229016	3.81694e-05	0.000267186	0	7.63388e-05	0	0	0	0	0	0	0	k__Bacteria;p__Proteobacteria;c__Alphaproteobacteria;o__Reyranellales;f__Reyranellaceae;g__Reyranella;
Aeromicrobium	0	0	0	0	0	0.000152678	0	7.63388e-05	0	3.81694e-05	0	0	0	0	0	0	0	0	0	0	k__Bacteria;p__Actinobacteriota;c__Actinobacteria;o__Propionibacteriales;f__Nocardioidaceae;g__Aeromicrobium;
[Eubacterium]_ventriosum_group	0	0	3.81694e-05	3.81694e-05	0.000152678	0.000267186	7.63388e-05	0	0	0	0	0	3.81694e-05	7.63388e-05	7.63388e-05	0	0.000229016	0	0	0.000114508	k__Bacteria;p__Firmicutes;c__Clostridia;o__Lachnospirales;f__Lachnospiraceae;g__[Eubacterium]_ventriosum_group;
Desulfatiglans	0	0	0	0	0	0.000725219	0	0	0	0	0	0	0.000229016	0	0	0	0	0.000305355	0	0.000343525	k__Bacteria;p__Desulfobacterota;c__Desulfobacteria;o__Desulfatiglandales;f__Desulfatiglandaceae;g__Desulfatiglans;
Shewanella	0	0	0	0	0	0	0	0	0	0	0	0	0	0	0	0	0	0	0	0	k__Bacteria;p__Proteobacteria;c__Gammaproteobacteria;o__Alteromonadales;f__Shewanellaceae;g__Shewanella;
Candidatus_Accumulibacter	0	0	0	7.63388e-05	0.000725219	0	0	0	0	0	0	0	0	0	0	0	0	0	0	0	k__Bacteria;p__Proteobacteria;c__Gammaproteobacteria;o__Burkholderiales;f__Rhodocyclaceae;g__Candidatus_Accumulibacter;
unidentified_Oscillospiraceae	0	0	0	3.81694e-05	0.000229016	3.81694e-05	7.63388e-05	0	0	0	0	0.000190847	0	3.81694e-05	0	0	0	0.000229016	3.81694e-05	0	k__Bacteria;p__unidentified_Bacteria;c__Clostridia;o__Oscillospirales;f__Oscillospiraceae;g__unidentified_Oscillospiraceae;
Prevotellaceae_UCG-003	0	0	0	0	3.81694e-05	0	0	0	0	0	0	3.81694e-05	0	0	0	0	0	0.000114508	0	0.000114508	k__Bacteria;p__Bacteroidota;c__Bacteroidia;o__Bacteroidales;f__Prevotellaceae;g__Prevotellaceae_UCG-003;
Roseisolibacter	0	0	0	0	0	0	0	0	0	0	0	0.000152678	0	0	0	0	0	0	0	3.81694e-05	k__Bacteria;p__Gemmatimonadetes;c__unidentified_Gemmatimonadetes;o__Gemmatimonadales;f__Gemmatimonadaceae;g__Roseisolibacter;
unidentified_Candidatus_Jorgensenbacteria	0	0	0	0	0	0	0	0	0	0	0	0	0	0	0	0	0	0	0	0	k__Bacteria;p__Candidatus_Jorgensenbacteria;c__unidentified_Candidatus_Jorgensenbacteria;o__unidentified_Candidatus_Jorgensenbacteria;f__unidentified_Candidatus_Jorgensenbacteria;g__unidentified_Candidatus_Jorgensenbacteria;
Azoarcus	0	0	0	0	0	0	0	0	0	0	0	0	0.000687049	0	0	0	0	0	0	0	k__Bacteria;p__Proteobacteria;c__Gammaproteobacteria;o__Burkholderiales;f__Rhodocyclaceae;g__Azoarcus;
Catenibacterium	0	0	0	0	0	0	0	0	0	0	7.63388e-05	7.63388e-05	0	0	0	0	0	0.000152678	0	0.000229016	k__Bacteria;p__Firmicutes;c__Bacilli;o__Erysipelotrichales;f__Erysipelatoclostridiaceae;g__Catenibacterium;
Microbispora	0	0	0	0	0	0	0	0	0	0	0	0	0	0	0	0	0	0	0	0	k__Bacteria;p__Actinobacteriota;c__Actinobacteria;o__Streptosporangiales;f__Streptosporangiaceae;g__Microbispora;
Agathobacter	0	0	0	0	0	0	0	0	0	0	0	0	0	0	0	0	0.000229016	0	0	0	k__Bacteria;p__Firmicutes;c__Clostridia;o__Lachnospirales;f__Lachnospiraceae;g__Agathobacter;
Family_XIII_UCG-001	7.63388e-05	0.000152678	0.000267186	0.000687049	0.000114508	0.000114508	0.000114508	0	0	0	0	0	0.000152678	7.63388e-05	7.63388e-05	3.81694e-05	7.63388e-05	3.81694e-05	0	0.000267186	k__Bacteria;p__Firmicutes;c__Clostridia;o__Peptostreptococcales-Tissierellales;f__Anaerovoracaceae;g__Family_XIII_UCG-001;
Novosphingobium	0	0	0	0	0.000152678	0	0	3.81694e-05	3.81694e-05	7.63388e-05	7.63388e-05	0.000114508	0.000687049	0	0	0	0	0	0	0	k__Bacteria;p__Proteobacteria;c__Alphaproteobacteria;o__Sphingomonadales;f__Sphingomonadaceae;g__Novosphingobium;
Marvinbryantia	0.000687049	0.00064888	3.81694e-05	0	3.81694e-05	0	0	0	0	0	0	0	0	0.000305355	0.000419863	7.63388e-05	0	7.63388e-05	0.000534372	0	k__Bacteria;p__Firmicutes;c__Clostridia;o__Lachnospirales;f__Lachnospiraceae;g__Marvinbryantia;
Subgroup_10	0	0	0	0	0	0	0	0.000190847	0.000114508	0.000152678	0.000190847	0.000229016	0	0	0	0	0	0	0	0.000190847	k__Bacteria;p__Acidobacteriota;c__Thermoanaerobaculia;o__Thermoanaerobaculales;f__Thermoanaerobaculaceae;g__Subgroup_10;
Candidatus_Udaeobacter	0	0	0	0	0	0	0	0.000114508	0	3.81694e-05	0	0	0	0	0	0	0	0	0	0	k__Bacteria;p__Verrucomicrobiota;c__Verrucomicrobiae;o__Chthoniobacterales;f__Chthoniobacteraceae;g__Candidatus_Udaeobacter;
Sva0081_sediment_group	0	0	0	0	0	0.000114508	0	0	0	0	0	0	0.00064888	0	0	0	0	0	0	0.000458033	k__Bacteria;p__Desulfobacterota;c__Desulfobacteria;o__Desulfobacterales;f__Desulfosarcinaceae;g__Sva0081_sediment_group;
Terrimonas	0	0	0	0	0	3.81694e-05	0	3.81694e-05	0	0	7.63388e-05	0	0	0	0	0	0	0	0	0	k__Bacteria;p__Bacteroidota;c__Bacteroidia;o__Chitinophagales;f__Chitinophagaceae;g__Terrimonas;
Erythrobacter	0	0	0	0	0.000114508	0	0	0	0	3.81694e-05	0	0	0.00061071	0	0	0	0	0	0	0	k__Bacteria;p__Proteobacteria;c__Alphaproteobacteria;o__Sphingomonadales;f__Sphingomonadaceae;g__Erythrobacter;
Comamonas	0	0	0	0.000534372	0.000229016	0	0	0	0	0	0	3.81694e-05	0	0	0	7.63388e-05	0	0	0	0	k__Bacteria;p__Proteobacteria;c__Gammaproteobacteria;o__Burkholderiales;f__Comamonadaceae;g__Comamonas;
SWB02	0	0	0	0	0	0.000152678	0	0.000152678	0.000114508	3.81694e-05	7.63388e-05	0	0.00061071	0	0	0	0	0	0	0	k__Bacteria;p__Proteobacteria;c__Alphaproteobacteria;o__Caulobacterales;f__Hyphomonadaceae;g__SWB02;
Candidatus_Koribacter	0	0	0	0	0	0	0	0	0	0	0	0	0	0	0	0	0	0	0	0	k__Bacteria;p__Acidobacteriota;c__Acidobacteriae;o__Acidobacteriales;f__Koribacteraceae;g__Candidatus_Koribacter;
Methylobacterium-Methylorubrum	0	0	3.81694e-05	0	0	0	0	0	0	0	0	0	0	0	0	0	0	0	0	0	k__Bacteria;p__Proteobacteria;c__Alphaproteobacteria;o__Rhizobiales;f__Beijerinckiaceae;g__Methylobacterium-Methylorubrum;
Candidatus_Alysiosphaera	0	0	0	0	0	3.81694e-05	0	0	0	0	0	0.00061071	7.63388e-05	0	0	0	0	0	0	0	k__Bacteria;p__Proteobacteria;c__Alphaproteobacteria;o__Tistrellales;f__Geminicoccaceae;g__Candidatus_Alysiosphaera;
unidentified_SBR1031	0	0	0	0	0	0	0	0	0	0	7.63388e-05	0	0.000152678	0	0	0	0	3.81694e-05	0	0.000267186	k__Bacteria;p__Chloroflexi;c__Anaerolineae;o__SBR1031;f__unidentified_SBR1031;g__unidentified_SBR1031;
Luedemannella	0	0	0	0	0	0.00061071	0	3.81694e-05	7.63388e-05	0	0	0.000190847	0.000114508	0	0	0	0	0	0	0	k__Bacteria;p__Actinobacteriota;c__Actinobacteria;o__Micromonosporales;f__Micromonosporaceae;g__Luedemannella;
Enhydrobacter	0	0	0	0	0	0	0	0	0	0	0	0	0	0	0	0	0	0	0	0	k__Bacteria;p__Proteobacteria;c__Gammaproteobacteria;o__Pseudomonadales;f__Moraxellaceae;g__Enhydrobacter;
Devosia	0	0	0	0	0	3.81694e-05	0	7.63388e-05	7.63388e-05	3.81694e-05	0.000152678	0.000229016	0.000229016	0	0	0	0	0	0	0.000114508	k__Bacteria;p__Proteobacteria;c__Alphaproteobacteria;o__Rhizobiales;f__Devosiaceae;g__Devosia;
YC-ZSS-LKJ147	0	0	0	0	0	0	0	0	0	0	0	0	0	0	0	0	0	0	0	0	k__Bacteria;p__Gemmatimonadota;c__Longimicrobia;o__Longimicrobiales;f__Longimicrobiaceae;g__YC-ZSS-LKJ147;
Dinghuibacter	0	0	0	0	0	0	0	0	0	0	0	0	0.000419863	0	0	0	0	0	0	0	k__Bacteria;p__Bacteroidota;c__Bacteroidia;o__Chitinophagales;f__Chitinophagaceae;g__Dinghuibacter;
ADurb.Bin063-1	0	0	0	0	0	0.000190847	0	0	0	0	0	0	7.63388e-05	0	0	0	0	0	0	0	k__Bacteria;p__Verrucomicrobiota;c__Verrucomicrobiae;o__Pedosphaerales;f__Pedosphaeraceae;g__ADurb.Bin063-1;
Jatrophihabitans	0	0	0	0	0	0	0	0	0	0	0	0	0	0	0	0	0	0	0	0	k__Bacteria;p__Actinobacteriota;c__Actinobacteria;o__Frankiales;f__Frankiaceae;g__Jatrophihabitans;
Pseudolabrys	0	0	0	0	0	0	0	0	0	0	0	0.000114508	0	0	0	0	0	0	0	3.81694e-05	k__Bacteria;p__Proteobacteria;c__Alphaproteobacteria;o__Rhizobiales;f__Xanthobacteraceae;g__Pseudolabrys;
Paeniclostridium	0	0	0	0	0.000267186	3.81694e-05	0	0	0	0	0	0	0.000152678	0	0	0	0.000267186	0	0	0	k__Bacteria;p__Firmicutes;c__Clostridia;o__Peptostreptococcales-Tissierellales;f__Peptostreptococcaceae;g__Paeniclostridium;
Filifactor	0	0	0	0	0	0	0	0	0	0	0	0	0	0	0	0	0	0	0	7.63388e-05	k__Bacteria;p__Firmicutes;c__Clostridia;o__Peptostreptococcales-Tissierellales;f__Peptostreptococcaceae;g__Filifactor;
Cardiobacterium	0	0	0	0	0	0	0	0	0	0	0	0	0	0	0	0	0	0	0	0	k__Bacteria;p__Proteobacteria;c__Gammaproteobacteria;o__Cardiobacteriales;f__Cardiobacteriaceae;g__Cardiobacterium;
Acetatifactor	3.81694e-05	3.81694e-05	0.000114508	0.000152678	0	0.000419863	0	0	0	0	0	3.81694e-05	0.000190847	7.63388e-05	7.63388e-05	0	0.000190847	0	7.63388e-05	0.000152678	k__Bacteria;p__Firmicutes;c__Clostridia;o__Lachnospirales;f__Lachnospiraceae;g__Acetatifactor;
Chryseolinea	0	0	0	0	0	0	0	0	3.81694e-05	0	3.81694e-05	0	3.81694e-05	0	0	0	0	0	0	0.000381694	k__Bacteria;p__Bacteroidota;c__Bacteroidia;o__Cytophagales;f__Microscillaceae;g__Chryseolinea;
Dechloromonas	0	0	0	0	3.81694e-05	0	0	0	0	0	0	0	0	0	0	0	0	0	0	0	k__Bacteria;p__Proteobacteria;c__Gammaproteobacteria;o__Burkholderiales;f__Rhodocyclaceae;g__Dechloromonas;
Thermopolyspora	0	0	0	0	0	0	0	0	0	0	0	0	0	0	0	0	0	0	0	0.000381694	k__Bacteria;p__Actinobacteriota;c__Actinobacteria;o__Streptosporangiales;f__Streptosporangiaceae;g__Thermopolyspora;
Eisenbergiella	0	0	0	0	0	0	0	0	0	0	0	0	0	0	0	0	0	0	0	0	k__Bacteria;p__Firmicutes;c__Clostridia;o__Lachnospirales;f__Lachnospiraceae;g__Eisenbergiella;
Pseudofulvimonas	0	0	0	0	0	0	0	0	0	0	0	0	0	0	0	0	0	0	0	0.000343525	k__Bacteria;p__Proteobacteria;c__Gammaproteobacteria;o__Xanthomonadales;f__Rhodanobacteraceae;g__Pseudofulvimonas;
Tumebacillus	0	0	0	0	0	0	0	0	0	0	0	0	0	0	0	0	0	0	0	0	k__Bacteria;p__Firmicutes;c__Bacilli;o__Alicyclobacillales;f__Alicyclobacillaceae;g__Tumebacillus;
SEEP-SRB1	0	0	0	0	0	0	0	0	0	0	0	0	0.000152678	0	0	0	0	0	0	0.000534372	k__Bacteria;p__Desulfobacterota;c__Desulfobacteria;o__Desulfobacterales;f__Desulfosarcinaceae;g__SEEP-SRB1;
Anaerolinea	0	0	0	0	0	0.000267186	0	0	0	0	0	0	0.000534372	0	0	0	0	0	0	0	k__Bacteria;p__Chloroflexi;c__Anaerolineae;o__Anaerolineales;f__Anaerolineaceae;g__Anaerolinea;
Nannocystis	0	0	0	0	0	0	0	7.63388e-05	0	0	0	0	3.81694e-05	0	0	0	0	0	0	3.81694e-05	k__Bacteria;p__Myxococcota;c__Polyangia;o__Nannocystales;f__Nannocystaceae;g__Nannocystis;
Mogibacterium	0	0	0	0	0	0	0	0	0	0	0	0	0	0	0	0	0	0	0	0	k__Bacteria;p__Firmicutes;c__Clostridia;o__Peptostreptococcales-Tissierellales;f__Anaerovoracaceae;g__Mogibacterium;
Brachybacterium	0	0	0	0	0	3.81694e-05	0	0	0	0	0	0	3.81694e-05	0	0	0	0	0	0	0	k__Bacteria;p__Actinobacteriota;c__Actinobacteria;o__Micrococcales;f__Dermabacteraceae;g__Brachybacterium;
UTBCD1	0	0	0	0	0	0	0	0	0	0	0	0	0	0	0	0	0	0	0	0	k__Bacteria;p__Bacteroidota;c__Bacteroidia;o__Chitinophagales;f__Chitinophagaceae;g__UTBCD1;
Pseudoruegeria	0	0	0	0.000534372	0	0	0	0	0	0	0	0	0	0	0	0	0	0	0	0	k__Bacteria;p__Proteobacteria;c__Alphaproteobacteria;o__Rhodobacterales;f__Rhodobacteraceae;g__Pseudoruegeria;
unidentified_Bacteria	0	0	0	0	0	0	0	0	0	0	0	0	0.000152678	0	0	0	0	0	0	7.63388e-05	k__Bacteria;p__unidentified_Bacteria;c__unidentified_Bacteria;o__unidentified_Bacteria;f__unidentified_Bacteria;g__unidentified_Bacteria;
Lachnospiraceae_UCG-010	0	0	0	0.000152678	7.63388e-05	3.81694e-05	0	0	0	0	0	0	3.81694e-05	0	0	0	0.000534372	0	0	7.63388e-05	k__Bacteria;p__Firmicutes;c__Clostridia;o__Lachnospirales;f__Lachnospiraceae;g__Lachnospiraceae_UCG-010;
Paludicola	0	7.63388e-05	0	0	0.000190847	0.000190847	3.81694e-05	0	0	0	0	0	0.000534372	0	0	0	7.63388e-05	0	0.000152678	0.000152678	k__Bacteria;p__Firmicutes;c__Clostridia;o__Oscillospirales;f__Ruminococcaceae;g__Paludicola;
Lachnospiraceae_XPB1014_group	0	0	0	0	0	0	0	0	0	0	0	0.000114508	0	0	0	0	0	0.000267186	0	0	k__Bacteria;p__Firmicutes;c__Clostridia;o__Lachnospirales;f__Lachnospiraceae;g__Lachnospiraceae_XPB1014_group;
Cohnella	0	0	0	0	0	0	0	0	0	0	3.81694e-05	0	0	0	0	0	0	0	0	7.63388e-05	k__Bacteria;p__Firmicutes;c__Bacilli;o__Paenibacillales;f__Paenibacillaceae;g__Cohnella;
Kribbella	0	0	0	0	0	0	0	3.81694e-05	0	0	3.81694e-05	7.63388e-05	0	0	0	0	0	0	0	0	k__Bacteria;p__Actinobacteriota;c__Actinobacteria;o__Propionibacteriales;f__Nocardioidaceae;g__Kribbella;
Pedomicrobium	0	0	0	0	0	0.000381694	0	0	0	7.63388e-05	3.81694e-05	0	0.000152678	0	0	0	0	0	0	0	k__Bacteria;p__Proteobacteria;c__Alphaproteobacteria;o__Rhizobiales;f__Hyphomicrobiaceae;g__Pedomicrobium;
CHKCI001	0	0	0	0	0	0	0	0	0	0	0	0	0	0	0	0	0	0	0	0	k__Bacteria;p__Firmicutes;c__Clostridia;o__Lachnospirales;f__Lachnospiraceae;g__CHKCI001;
Parafilimonas	0	0	0	0	0	7.63388e-05	0	0	0	0	0	0	0	0	0	0	0	0	0	0	k__Bacteria;p__Bacteroidota;c__Bacteroidia;o__Chitinophagales;f__Chitinophagaceae;g__Parafilimonas;
Tsukamurella	0	0	0	0	0	0	0	0	0	0	0	0	0	0	0	0	0	0	0	0	k__Bacteria;p__Actinobacteriota;c__Actinobacteria;o__Corynebacteriales;f__Tsukamurellaceae;g__Tsukamurella;
Blastocatella	0	0	0	0	0	0	0	0	0	3.81694e-05	0	0.000496202	0	0	0	0	0	0	0	0	k__Bacteria;p__Acidobacteriota;c__Blastocatellia;o__Blastocatellales;f__Blastocatellaceae;g__Blastocatella;
Pedobacter	0	0	0	0	0	0	0	0	0.000114508	3.81694e-05	0	0	0	0	0	0	0	0	0	0	k__Bacteria;p__Bacteroidota;c__Bacteroidia;o__Sphingobacteriales;f__Sphingobacteriaceae;g__Pedobacter;
Anoxybacillus	0	0	0	0	0	0	0	0	0	0	0	0	0	0	0	0	0	0	0	0.000305355	k__Bacteria;p__Firmicutes;c__Bacilli;o__Bacillales;f__Bacillaceae;g__Anoxybacillus;
Chitinophaga	0	0	0	0	0	0	0	0	0	0	3.81694e-05	0	0	0	0	0	0	0	0	0	k__Bacteria;p__Bacteroidota;c__Bacteroidia;o__Chitinophagales;f__Chitinophagaceae;g__Chitinophaga;
Porphyrobacter	0	0	0	0	0	0	0	0	0	0	0	3.81694e-05	0.000114508	0	0	0	0	0	0	0	k__Bacteria;p__Proteobacteria;c__Alphaproteobacteria;o__Sphingomonadales;f__Sphingomonadaceae;g__Porphyrobacter;
Dyadobacter	0	0	0	0	0	0	0	0	0	0	0	0	0	0	0	0	0	0	0	0	k__Bacteria;p__Bacteroidota;c__Bacteroidia;o__Cytophagales;f__Spirosomaceae;g__Dyadobacter;
Candidatus_Methylomirabilis	0	0	0	0	0	3.81694e-05	0	0	0	0	0	0	0	0	0	0	0	0	0	0	k__Bacteria;p__Methylomirabilota;c__Methylomirabilia;o__Methylomirabilales;f__Methylomirabilaceae;g__Candidatus_Methylomirabilis;
Anaeroplasma	3.81694e-05	0	0.000343525	0.000343525	0.000114508	0.000458033	0	0	0	0	0	0	7.63388e-05	3.81694e-05	0	0	7.63388e-05	0	0	3.81694e-05	k__Bacteria;p__Firmicutes;c__Bacilli;o__Acholeplasmatales;f__Acholeplasmataceae;g__Anaeroplasma;
Woeseia	0	0	0	0	0	0	0	0	0	0	0	0	0.000343525	0	0	0	0	0	0	7.63388e-05	k__Bacteria;p__Proteobacteria;c__Gammaproteobacteria;o__Steroidobacterales;f__Woeseiaceae;g__Woeseia;
Allisonella	0	0	0	0.000152678	0	0	0	0	0	0	0	0.000114508	0	0	0	0	0	0.000114508	0	0	k__Bacteria;p__Firmicutes;c__Negativicutes;o__Veillonellales-Selenomonadales;f__Veillonellaceae;g__Allisonella;
Demequina	0	0	0	0.000458033	0	0	0	0	0	0	0	0	0	0	0	0	0	0	0	7.63388e-05	k__Bacteria;p__Actinobacteriota;c__Actinobacteria;o__Micrococcales;f__Demequinaceae;g__Demequina;
Negativibacillus	7.63388e-05	0	0	3.81694e-05	0	7.63388e-05	0	0	0	0	0	3.81694e-05	3.81694e-05	0	0	0	3.81694e-05	7.63388e-05	7.63388e-05	0.000305355	k__Bacteria;p__Firmicutes;c__Clostridia;o__Oscillospirales;f__Ruminococcaceae;g__Negativibacillus;
Dietzia	0	0	0	0	0.000458033	0	0	0	0	0	0	0	0	0	0	0	0	0	0	0	k__Bacteria;p__Actinobacteriota;c__Actinobacteria;o__Corynebacteriales;f__Dietziaceae;g__Dietzia;
unidentified_Mitochondria	0	0.000190847	0	0	0	0	3.81694e-05	0	0	0	0	0	7.63388e-05	0	3.81694e-05	0	0	0	0	0	k__Bacteria;p__Proteobacteria;c__Alphaproteobacteria;o__Rickettsiales;f__Mitochondria;g__unidentified_Mitochondria;
Hyphomicrobium	0	0	0	0	0	0	0	0	0	7.63388e-05	0	0	0	0	0	0	0	0	0	0	k__Bacteria;p__Proteobacteria;c__Alphaproteobacteria;o__Rhizobiales;f__Hyphomicrobiaceae;g__Hyphomicrobium;
[Clostridium]_innocuum_group	0	0	0	7.63388e-05	0	0.000419863	0	0	0	0	0	0	0.000190847	0	0	0	0.000458033	0	3.81694e-05	3.81694e-05	k__Bacteria;p__Firmicutes;c__Bacilli;o__Erysipelotrichales;f__Erysipelotrichaceae;g__[Clostridium]_innocuum_group;
Shuttleworthia	0	0	0	0	0	0	0	0	0	0	0	0	0	0	0	0	0	0	0	0	k__Bacteria;p__Firmicutes;c__Clostridia;o__Lachnospirales;f__Lachnospiraceae;g__Shuttleworthia;
Polyangium	0	0	0	0	0	0	0	0	0	0	0	0	0.000458033	0	0	0	0	0	0	0	k__Bacteria;p__Myxococcota;c__Polyangia;o__Polyangiales;f__Polyangiaceae;g__Polyangium;
Nocardioides	0	0	0	0	0	3.81694e-05	0	7.63388e-05	0	3.81694e-05	7.63388e-05	3.81694e-05	0.000114508	0	0	0	0	0	0	3.81694e-05	k__Bacteria;p__Actinobacteriota;c__Actinobacteria;o__Propionibacteriales;f__Nocardioidaceae;g__Nocardioides;
Stenotrophobacter	0	0	0	0	0	0	0	0	0	0	0	0	0.000114508	0	0	0	0	0	0	0	k__Bacteria;p__Acidobacteriota;c__Blastocatellia;o__Blastocatellales;f__Blastocatellaceae;g__Stenotrophobacter;
Herpetosiphon	0	0	0	0	0	0	0	0	0	0	0	0	0	0	0	0	0	0	0	0	k__Bacteria;p__Chloroflexi;c__Chloroflexia;o__Chloroflexales;f__Herpetosiphonaceae;g__Herpetosiphon;
Candidatus_Soleaferrea	0	0	3.81694e-05	0	7.63388e-05	7.63388e-05	0	0	0	0	0	0	0.000190847	0	3.81694e-05	0	0.000152678	0	0	0	k__Bacteria;p__Firmicutes;c__Clostridia;o__Oscillospirales;f__Ruminococcaceae;g__Candidatus_Soleaferrea;
Ornithinimicrobium	0	0	0	3.81694e-05	0	0	0	0	0	0	0	0	0	0	0	0	0	0	0	0	k__Bacteria;p__Actinobacteriota;c__Actinobacteria;o__Micrococcales;f__Intrasporangiaceae;g__Ornithinimicrobium;
Altererythrobacter	0	0	0	0	0	3.81694e-05	0	0	3.81694e-05	7.63388e-05	3.81694e-05	0	0.000229016	0	0	0	0	0	0	0	k__Bacteria;p__Proteobacteria;c__Alphaproteobacteria;o__Sphingomonadales;f__Sphingomonadaceae;g__Altererythrobacter;
GOUTA6	0	0	0	0	0	3.81694e-05	0	0	0	0	0	0	0	0	0	0	0	0	0	0	k__Bacteria;p__Proteobacteria;c__Gammaproteobacteria;o__Burkholderiales;f__Nitrosomonadaceae;g__GOUTA6;
Sphingobium	0	0	0	0	0	0	0	0	0	7.63388e-05	0	0.000114508	3.81694e-05	0	0	0	0	0	0	0	k__Bacteria;p__Proteobacteria;c__Alphaproteobacteria;o__Sphingomonadales;f__Sphingomonadaceae;g__Sphingobium;
Lysinibacillus	0	0	0	0	0	0	0	0.000152678	0.000190847	0.000152678	7.63388e-05	0	3.81694e-05	0	0	0	0	0	0	0	k__Bacteria;p__Firmicutes;c__Bacilli;o__Bacillales;f__Planococcaceae;g__Lysinibacillus;
Arcobacter	0	0	0	0	0	0	0	0	0	0	0	0	0	0	0	0	0	0	0	0	k__Bacteria;p__Campilobacterota;c__Campylobacteria;o__Campylobacterales;f__Arcobacteraceae;g__Arcobacter;
OLB12	0	0	0	0	0	3.81694e-05	0	0	0	0	0	0	0.000229016	0	0	0	0	0	0	0	k__Bacteria;p__Bacteroidota;c__Bacteroidia;o__Cytophagales;f__Microscillaceae;g__OLB12;
Vogesella	0	0	0	0	0	0	0	0	0	0	0	0	3.81694e-05	0	0	0	0	0	0	0	k__Bacteria;p__Proteobacteria;c__Gammaproteobacteria;o__Burkholderiales;f__Chromobacteriaceae;g__Vogesella;
Legionella	0	0	0	0	0	0	0	0	0	0	0	0	0	0	0	0	0	0	0	0	k__Bacteria;p__Proteobacteria;c__Gammaproteobacteria;o__Legionellales;f__Legionellaceae;g__Legionella;
Syntrophus	0	0	0	0	0	7.63388e-05	0	0	0	0	0	0	3.81694e-05	0	0	0	0	0	0	0	k__Bacteria;p__Desulfobacterota;c__Syntrophia;o__Syntrophales;f__Syntrophaceae;g__Syntrophus;
Hydrogenophaga	0	0	0	0	0	7.63388e-05	3.81694e-05	0	0	0	0	0	0.000152678	0	0	0	0	0	0	0	k__Bacteria;p__Proteobacteria;c__Gammaproteobacteria;o__Burkholderiales;f__Comamonadaceae;g__Hydrogenophaga;
Bdellovibrio	0	0	0	0	0	3.81694e-05	0	3.81694e-05	0.000152678	0	0.000152678	0.000114508	0	0	0	0	0	0	0	0.000190847	k__Bacteria;p__Bdellovibrionota;c__Bdellovibrionia;o__Bdellovibrionales;f__Bdellovibrionaceae;g__Bdellovibrio;
mle1-7	0	0	0	0	0	0.000305355	0	0	0	0	0	0	0.000229016	0	0	0	0	0	0	0	k__Bacteria;p__Proteobacteria;c__Gammaproteobacteria;o__Burkholderiales;f__Nitrosomonadaceae;g__mle1-7;
Hyphomonas	0	0	0	0	0	0	0	0	0	0	0	0	0.000381694	0	3.81694e-05	0	0	0	0	0	k__Bacteria;p__Proteobacteria;c__Alphaproteobacteria;o__Caulobacterales;f__Hyphomonadaceae;g__Hyphomonas;
Paracoccus	3.81694e-05	0	0	0	0	0	0	0	0	0	0	0	0	0	0	0	0	0	0	0	k__Bacteria;p__Proteobacteria;c__Alphaproteobacteria;o__Rhodobacterales;f__Rhodobacteraceae;g__Paracoccus;
Oceanobacillus	0	0	0	0	0	0	0	0.000152678	0	0.000114508	3.81694e-05	0	0	0	0	0	0	0	0	0	k__Bacteria;p__Firmicutes;c__Bacilli;o__Bacillales;f__Bacillaceae;g__Oceanobacillus;
Pasteurella	0	0	0	7.63388e-05	0	0	0	0	0	0	0	0.000114508	0	0	0	0	0	3.81694e-05	0	0	k__Bacteria;p__Proteobacteria;c__Gammaproteobacteria;o__Pasteurellales;f__Pasteurellaceae;g__Pasteurella;
Vibrio	0	0	0	7.63388e-05	0	0	0	0	0	0	0	0	0	0	0	0	0	0	0	0	k__Bacteria;p__Proteobacteria;c__Gammaproteobacteria;o__Vibrionales;f__Vibrionaceae;g__Vibrio;
Desulfomicrobium	0	0	0	0	0	0	0	0	0	0	0	0	0.000343525	0	0	0	0	0	0	0	k__Bacteria;p__Desulfobacterota;c__Desulfovibrionia;o__Desulfovibrionales;f__Desulfomicrobiaceae;g__Desulfomicrobium;
unidentified_MBNT15	0	0	0	0	0	7.63388e-05	0	0	0	0	0	0	0.000114508	0	0	0	0	0	0	0	k__Bacteria;p__MBNT15;c__unidentified_MBNT15;o__unidentified_MBNT15;f__unidentified_MBNT15;g__unidentified_MBNT15;
Massilia	0	0	0	0	0	0	0	0	0	0	0	0	0	0	0	0	0	0	0	0	k__Bacteria;p__Proteobacteria;c__Gammaproteobacteria;o__Burkholderiales;f__Oxalobacteraceae;g__Massilia;
Defluviitaleaceae_UCG-011	0	0.000114508	0	0	0	0	0	0	0	0	0	0	0	7.63388e-05	0.000114508	0	3.81694e-05	0	0	3.81694e-05	k__Bacteria;p__Firmicutes;c__Clostridia;o__Lachnospirales;f__Defluviitaleaceae;g__Defluviitaleaceae_UCG-011;
Rhodoplanes	0	0	0	0	0	0	0	0	0	0	0	7.63388e-05	0	0	0	0	0	0	0	0	k__Bacteria;p__Proteobacteria;c__Alphaproteobacteria;o__Rhizobiales;f__Xanthobacteraceae;g__Rhodoplanes;
Faecalitalea	0	0	0	0	0	0	0	0	0	0	0	0	0	0	0	0	0	0	0	0	k__Bacteria;p__Firmicutes;c__Bacilli;o__Erysipelotrichales;f__Erysipelotrichaceae;g__Faecalitalea;
Cerasibacillus	0	0	0	0	0	0	0	0.000190847	0	3.81694e-05	0.000114508	0	0	0	0	0	0	0	0	0	k__Bacteria;p__Firmicutes;c__Bacilli;o__Bacillales;f__Bacillaceae;g__Cerasibacillus;
Phaselicystis	0	0	0	0	0	0	0	0	0	0.000190847	3.81694e-05	0	0.000190847	0	0	0	0	0	0	0	k__Bacteria;p__Myxococcota;c__Polyangia;o__Polyangiales;f__Phaselicystidaceae;g__Phaselicystis;
unidentified_Flavobacteriaceae	0	0	0	0	0	0	0	0	0	0	0	0	0.000381694	0	0	0	0	0	0	0	k__Bacteria;p__Bacteroidota;c__Bacteroidia;o__Flavobacteriales;f__Flavobacteriaceae;g__unidentified_Flavobacteriaceae;
Syntrophococcus	0	0	0	0	0	0	0	0	0	0	0	0	0	0	0	0	0	0	0	0	k__Bacteria;p__Firmicutes;c__Clostridia;o__Lachnospirales;f__Lachnospiraceae;g__Syntrophococcus;
Sh765B-TzT-35	0	0	0	0	0	0.000343525	0	0	0	0	0	0	0.000267186	0	0	0	0	0	0	0	k__Bacteria;p__Methylomirabilota;c__Methylomirabilia;o__Methylomirabilales;f__Methylomirabilaceae;g__Sh765B-TzT-35;
Lachnospiraceae_UCG-004	0	0	0	0	0	0	0	0	0	0	0	0	0	0	0	0	0.000229016	0	0	0	k__Bacteria;p__Firmicutes;c__Clostridia;o__Lachnospirales;f__Lachnospiraceae;g__Lachnospiraceae_UCG-004;
Rehaibacterium	0	0	0	0	0	0	0	0	0	0	0	0	0	0	0	0	0	0	0	0	k__Bacteria;p__Proteobacteria;c__Gammaproteobacteria;o__Xanthomonadales;f__Xanthomonadaceae;g__Rehaibacterium;
Coprobacillus	0	0	0	0	0	0	0	0	0	0	0	0	0	0	0	0	0	0	0	0	k__Bacteria;p__Firmicutes;c__Bacilli;o__Erysipelotrichales;f__Erysipelatoclostridiaceae;g__Coprobacillus;
Fluviicola	0	0	0	0	0	0	0	0	0	0	0	0	0	0	0	0	0	0	0	0	k__Bacteria;p__Bacteroidota;c__Bacteroidia;o__Flavobacteriales;f__Crocinitomicaceae;g__Fluviicola;
Polycyclovorans	0	0	0	0	0	0	0	7.63388e-05	3.81694e-05	0.000152678	0.000343525	0	0	0	0	0	0	0	0	0	k__Bacteria;p__Proteobacteria;c__Gammaproteobacteria;o__Salinisphaerales;f__Solimonadaceae;g__Polycyclovorans;
Eikenella	0	0	0	0	0	0	0	0	0	0	0	0	0	0	0	0	0	0	0	0	k__Bacteria;p__Proteobacteria;c__Gammaproteobacteria;o__Burkholderiales;f__Neisseriaceae;g__Eikenella;
Pusillimonas	0	0	0	0	0	0	0	0	0	0	0	0	0	0	0	0	0	0	0	3.81694e-05	k__Bacteria;p__Proteobacteria;c__Gammaproteobacteria;o__Burkholderiales;f__Alcaligenaceae;g__Pusillimonas;
Thermobifida	0	0	0	0	0	0	0	0	0	0	0	0	0	0	0	0	0	0	0	0.000190847	k__Bacteria;p__Actinobacteriota;c__Actinobacteria;o__Streptosporangiales;f__Nocardiopsaceae;g__Thermobifida;
Crenothrix	0	0	0	0	0	0	0	0	0	0	0	0	0	0	0	0	0	0	0	0	k__Bacteria;p__Proteobacteria;c__Gammaproteobacteria;o__Methylococcales;f__Methylomonadaceae;g__Crenothrix;
Ruegeria	7.63388e-05	0	0	0.000343525	0	0	0	0	0	0	0	0	0	0	0	0	0	0	0	0	k__Bacteria;p__Proteobacteria;c__Alphaproteobacteria;o__Rhodobacterales;f__Rhodobacteraceae;g__Ruegeria;
Eubacterium	0	0	0	0	7.63388e-05	0	0	0	0	0	0	0	0	0	0	0	0	0	0	0.000229016	k__Bacteria;p__Firmicutes;c__Clostridia;o__Eubacteriales;f__Eubacteriaceae;g__Eubacterium;
Anaerofustis	0.000114508	0	7.63388e-05	3.81694e-05	0.000343525	0	0	0	0	0	0	0	0	3.81694e-05	0	0.000152678	7.63388e-05	0	0.000114508	0	k__Bacteria;p__Firmicutes;c__Clostridia;o__Eubacteriales;f__Anaerofustaceae;g__Anaerofustis;
Lentimicrobium	0	0	0	0	0	0	0	0	0	0	0	0	0	0	0	0	0	0	0	0	k__Bacteria;p__Bacteroidota;c__Bacteroidia;o__Sphingobacteriales;f__Lentimicrobiaceae;g__Lentimicrobium;
Nordella	0	0	0	0	0	0	0	3.81694e-05	7.63388e-05	7.63388e-05	0.000229016	7.63388e-05	0	0	0	0	0	0	0	7.63388e-05	k__Bacteria;p__Proteobacteria;c__Alphaproteobacteria;o__Rhizobiales;f__unidentified_Rhizobiales;g__Nordella;
Methylomicrobium	0	0	0	0	0	3.81694e-05	0	0	0	0	0	0	0	0	0	0	0	0	0	0	k__Bacteria;p__Proteobacteria;c__Gammaproteobacteria;o__Methylococcales;f__Methylomonadaceae;g__Methylomicrobium;
Pseudonocardia	0	0	0	0	3.81694e-05	0	0	3.81694e-05	0	3.81694e-05	3.81694e-05	0.000305355	0.000114508	0	0	0	0	0	0	0	k__Bacteria;p__Actinobacteriota;c__Actinobacteria;o__Pseudonocardiales;f__Pseudonocardiaceae;g__Pseudonocardia;
Iamia	0	0	0	0	0.000114508	0	0	0.000114508	3.81694e-05	3.81694e-05	0.000267186	0.000114508	0	0	0	0	0	0	0	0	k__Bacteria;p__Actinobacteriota;c__Acidimicrobiia;o__Microtrichales;f__Iamiaceae;g__Iamia;
Clostridium_sensu_stricto_2	0	0	0	0	0	0	0	0	0	0	0	0	0	0	0	0	0	0	3.81694e-05	0	k__Bacteria;p__Firmicutes;c__Clostridia;o__Clostridiales;f__Clostridiaceae;g__Clostridium_sensu_stricto_2;
Agromyces	0	0	0	0	0	0	0	0	0	3.81694e-05	7.63388e-05	3.81694e-05	0.000190847	0	0	0	0	0	0	0	k__Bacteria;p__Actinobacteriota;c__Actinobacteria;o__Micrococcales;f__Microbacteriaceae;g__Agromyces;
Spirochaeta	0	0	0	0	0	0.000305355	0	0	0	0	0	0	7.63388e-05	0	0	0	0	0	0	7.63388e-05	k__Bacteria;p__Spirochaetota;c__Spirochaetia;o__Spirochaetales;f__Spirochaetaceae;g__Spirochaeta;
Paludibaculum	0	0	0	0	0	3.81694e-05	0	0	0	0	0	0	0.000305355	0	0	0	0	0	0	0	k__Bacteria;p__Acidobacteriota;c__Acidobacteriae;o__unidentified_Acidobacteriae;f__unidentified_Acidobacteriae;g__Paludibaculum;
CL500-29_marine_group	0	0	0	0	0.000152678	3.81694e-05	0	0	0	3.81694e-05	0	3.81694e-05	0	0	0	0	0	0	0	0	k__Bacteria;p__Actinobacteriota;c__Acidimicrobiia;o__Microtrichales;f__Ilumatobacteraceae;g__CL500-29_marine_group;
Methanosaeta	0	0	0	0	0	0	0	0	0	0	0	0	0	0	0	0	0	0	0	0	k__Archaea;p__Halobacterota;c__Methanosarcinia;o__Methanosarciniales;f__Methanosaetaceae;g__Methanosaeta;
Roseiarcus	0	0	0	0	0	0	0	0	0	0	0	0	0	0	0	0	0	0	0	0	k__Bacteria;p__Proteobacteria;c__Alphaproteobacteria;o__Rhizobiales;f__Beijerinckiaceae;g__Roseiarcus;
Ignavibacterium	0	0	0	0	0	0	0	0	0	0	0	0	7.63388e-05	0	0	0	0	0	0	0	k__Bacteria;p__Bacteroidota;c__Ignavibacteria;o__Ignavibacteriales;f__Ignavibacteriaceae;g__Ignavibacterium;
Sulfurospirillum	0	0	0	0	3.81694e-05	0	0	0	0	0	0	0	0	0	0	0	0	0	0	0	k__Bacteria;p__Campilobacterota;c__Campylobacteria;o__Campylobacterales;f__Sulfurospirillaceae;g__Sulfurospirillum;
Amphiplicatus	0	0	0	0	0	0	0	0	0	0	0	0	0.000305355	0	0	0	0	0	0	0	k__Bacteria;p__Proteobacteria;c__Alphaproteobacteria;o__Caulobacterales;f__Parvularculaceae;g__Amphiplicatus;
Micromonospora	0	0	0	0	0	3.81694e-05	0	0	0	0	0	0	7.63388e-05	0	0	0	0	0	0	0	k__Bacteria;p__Actinobacteriota;c__Actinobacteria;o__Micromonosporales;f__Micromonosporaceae;g__Micromonospora;
Archangium	0	0	0	0	0	0	0	0	0	0	0	7.63388e-05	7.63388e-05	0	0	0	0	0	0	0	k__Bacteria;p__Myxococcota;c__Myxococcia;o__Myxococcales;f__Myxococcaceae;g__Archangium;
Enteractinococcus	0	0	0	0	0	0	0	0	0	0	7.63388e-05	0	0	3.81694e-05	0	0	3.81694e-05	0	0	0	k__Bacteria;p__Actinobacteriota;c__Actinobacteria;o__Micrococcales;f__Micrococcaceae;g__Enteractinococcus;
Geodermatophilus	0	0	0	0	0	0	0	0.000114508	7.63388e-05	3.81694e-05	0	0.000305355	0	0	0	0	0	0	0	0	k__Bacteria;p__Actinobacteriota;c__Actinobacteria;o__Frankiales;f__Geodermatophilaceae;g__Geodermatophilus;
DNF00809	0	0	0	0	0.000305355	0	0	0	0	0	0	0	0	0	0	0	7.63388e-05	0	0	0	k__Bacteria;p__Actinobacteriota;c__Coriobacteriia;o__Coriobacteriales;f__Eggerthellaceae;g__DNF00809;
Pajaroellobacter	0	0	0	0	0	0	0	0	3.81694e-05	3.81694e-05	0.000114508	0	0.000152678	0	0	0	0	0	0	0	k__Bacteria;p__Myxococcota;c__Polyangia;o__Polyangiales;f__Polyangiaceae;g__Pajaroellobacter;
Sulfurovum	0	0	0	0	0	0	0	0	0	0	0	0	0	0	0	0	0	0	0	0	k__Bacteria;p__Campilobacterota;c__Campylobacteria;o__Campylobacterales;f__Sulfurovaceae;g__Sulfurovum;
Adhaeribacter	0	0	0	0	0	0	0	3.81694e-05	0	0	0	0	0	0	0	0	0	0	0	0	k__Bacteria;p__Bacteroidota;c__Bacteroidia;o__Cytophagales;f__Hymenobacteraceae;g__Adhaeribacter;
Aridibacter	0	0	0	0	0	0	0	0	0	0	0	0.000267186	0	0	0	0	0	0	0	0	k__Bacteria;p__Acidobacteriota;c__Blastocatellia;o__Blastocatellales;f__Blastocatellaceae;g__Aridibacter;
Bordetella	0	0	0.000114508	0	0	0.000114508	0	0	0	0	0	0	0.000267186	0	0	0	0.000190847	0	0	0	k__Bacteria;p__Proteobacteria;c__Gammaproteobacteria;o__Burkholderiales;f__Alcaligenaceae;g__Bordetella;
unidentified_Thermodesulfovibrionia	0	0	0	0	0	0.000267186	0	0	0	0	0	0	0.000114508	0	0	0	0	0	0	0	k__Bacteria;p__unidentified_Bacteria;c__Thermodesulfovibrionia;o__unidentified_Thermodesulfovibrionia;f__unidentified_Thermodesulfovibrionia;g__unidentified_Thermodesulfovibrionia;
Ilumatobacter	0	0	0	7.63388e-05	0	0	0	0	0	7.63388e-05	0	3.81694e-05	0.000190847	0	3.81694e-05	0	0	0	0	7.63388e-05	k__Bacteria;p__Actinobacteriota;c__Acidimicrobiia;o__Microtrichales;f__Ilumatobacteraceae;g__Ilumatobacter;
Fermentimonas	0	0	0	0	0	0	0	0	0	0	0	0	0	0	0	0	0	0	0	0	k__Bacteria;p__Bacteroidota;c__Bacteroidia;o__Bacteroidales;f__Dysgonomonadaceae;g__Fermentimonas;
Erysipelothrix	0	0	0	0	0	0	0	0	0	0	7.63388e-05	0	0.000114508	0	0	0	0	0	0	0	k__Bacteria;p__Firmicutes;c__Bacilli;o__Erysipelotrichales;f__Erysipelotrichaceae;g__Erysipelothrix;
Cellulomonas	0	0	0	0	0	3.81694e-05	0	0	3.81694e-05	0	0	0	0	0	0	0	0	0	0	3.81694e-05	k__Bacteria;p__Actinobacteriota;c__Actinobacteria;o__Micrococcales;f__Cellulomonadaceae;g__Cellulomonas;
Senegalimassilia	0	0	0	0	0	0	0	0	0	0	0	0	0	0	0	0	0.000267186	0	0	0	k__Bacteria;p__Actinobacteriota;c__Coriobacteriia;o__Coriobacteriales;f__Eggerthellaceae;g__Senegalimassilia;
unidentified_Chitinophagaceae	0	0	0	0	0	0	0	0	0	0	0	0	0	0	0	0	0	0	0	0	k__Bacteria;p__unidentified_Bacteria;c__Bacteroidia;o__Chitinophagales;f__Chitinophagaceae;g__unidentified_Chitinophagaceae;
Acidothermus	0	0	0	0	0	0	0	0	0	0	0	0	0	0	0	0	0	0	0	0	k__Bacteria;p__Actinobacteriota;c__Actinobacteria;o__Frankiales;f__Acidothermaceae;g__Acidothermus;
Mycobacterium	0	0	0	0	3.81694e-05	0	0	0	0	0	0.000114508	7.63388e-05	0.000114508	0	0	0	0	0	0	0	k__Bacteria;p__Actinobacteriota;c__Actinobacteria;o__Corynebacteriales;f__Mycobacteriaceae;g__Mycobacterium;
Thauera	0	0	0	0	0	0	0	0	0	0	0	0	0	0	0	0	0	0	0	0	k__Bacteria;p__Proteobacteria;c__Gammaproteobacteria;o__Burkholderiales;f__Rhodocyclaceae;g__Thauera;
Piscinibacter	0	0	0	0	0	0	0	0	0	0	0	0	0.000267186	0	0	0	0	0	0	0	k__Bacteria;p__Proteobacteria;c__Gammaproteobacteria;o__Burkholderiales;f__Comamonadaceae;g__Piscinibacter;
Dorea	0	0	0	0	0	0	0	0	0	0	0	0	0	0	0	0	0.000190847	0	0	0	k__Bacteria;p__Firmicutes;c__Clostridia;o__Lachnospirales;f__Lachnospiraceae;g__Dorea;
Deinococcus	0	0	0	0	0	0	0	0	0	0	0	0	0	0	0	0	0	0	0	0	k__Bacteria;p__Deinococcota;c__Deinococci;o__Deinococcales;f__Deinococcaceae;g__Deinococcus;
Ellin516	0	0	0	0	0	0	0	0	0	0	0	0	0	0	0	0	0	0	0	0	k__Bacteria;p__Verrucomicrobiota;c__Verrucomicrobiae;o__Pedosphaerales;f__Pedosphaeraceae;g__Ellin516;
IS-44	0	0	0	0	0	0	0	0.000267186	7.63388e-05	7.63388e-05	3.81694e-05	0	0	0	0	0	0	0	0	3.81694e-05	k__Bacteria;p__Proteobacteria;c__Gammaproteobacteria;o__Burkholderiales;f__Nitrosomonadaceae;g__IS-44;
Pseudopropionibacterium	0	0	0	0	0	0	0	0	0	0	0	0	0	0	0	0	0	0	0	0	k__Bacteria;p__Actinobacteriota;c__Actinobacteria;o__Propionibacteriales;f__Propionibacteriaceae;g__Pseudopropionibacterium;
Porticoccus	0	0	0	0	0	0	0	0	0	0	0	0	0.000267186	0	0	0	0	0	0	0	k__Bacteria;p__Proteobacteria;c__Gammaproteobacteria;o__Cellvibrionales;f__Porticoccaceae;g__Porticoccus;
Epulopiscium	0	0	0	0	3.81694e-05	0	0	0	0	0	0	3.81694e-05	0	0	0	0	0	7.63388e-05	0	0	k__Bacteria;p__Firmicutes;c__Clostridia;o__Lachnospirales;f__Lachnospiraceae;g__Epulopiscium;
Conexibacter	0	0	0	0	0	0	0	7.63388e-05	0	0	3.81694e-05	0	0	0	0	0	0	0	0	3.81694e-05	k__Bacteria;p__Actinobacteriota;c__Thermoleophilia;o__Solirubrobacterales;f__Solirubrobacteraceae;g__Conexibacter;
Garicola	0	0	0	0	0	0	0	0	0	0	0	0	0	0	0	0	0	0	0	0	k__Bacteria;p__Actinobacteriota;c__Actinobacteria;o__Micrococcales;f__Micrococcaceae;g__Garicola;
Arenimonas	0	0	0	0	0	0	0	3.81694e-05	7.63388e-05	7.63388e-05	3.81694e-05	0	3.81694e-05	0	0	0	0	0	0	0	k__Bacteria;p__Proteobacteria;c__Gammaproteobacteria;o__Xanthomonadales;f__Xanthomonadaceae;g__Arenimonas;
Ureibacillus	0	0	0	0	0	0	0	3.81694e-05	0	0	0	0	0	0	0	0	0	0	0	0	k__Bacteria;p__Firmicutes;c__Bacilli;o__Bacillales;f__Bacillaceae;g__Ureibacillus;
Methanococcoides	0	0	0	0	0	0	0	0	0	0	0	0	0	0	0	0	0	0	0	0	k__Archaea;p__Halobacterota;c__Methanosarcinia;o__Methanosarciniales;f__Methanosarcinaceae;g__Methanococcoides;
[Cytophaga]_xylanolytica_group	0	0	0	0	0	0	0	0	0	0	0	0	0.000267186	0	0	0	0	0	0	0	k__Bacteria;p__Bacteroidota;c__Bacteroidia;o__Bacteroidales;f__Marinilabiliaceae;g__[Cytophaga]_xylanolytica_group;
Catenisphaera	0	0	0	3.81694e-05	0	0	0	0	0	0	0	0.000114508	0	0	0	0	0	7.63388e-05	0	0	k__Bacteria;p__Firmicutes;c__Bacilli;o__Erysipelotrichales;f__Erysipelotrichaceae;g__Catenisphaera;
Desulfofaba	0	0	0	0	0	0	0	0	0	0	0	0	0	0	0	0	0	0	0	0	k__Bacteria;p__Desulfobacterota;c__Desulfobacteria;o__Desulfobacterales;f__Desulfolunaceae;g__Desulfofaba;
Cellulosilyticum	0	0	0	0	0	0	0	0	0	0	0	0	3.81694e-05	0	0	0	0	0	0	0	k__Bacteria;p__Firmicutes;c__Clostridia;o__Lachnospirales;f__Lachnospiraceae;g__Cellulosilyticum;
Sphaerobacter	0	0	0	0	0	0	0	0	0	0	0	0	0	0	0	0	0	0	0	0	k__Bacteria;p__Chloroflexi;c__Chloroflexia;o__Thermomicrobiales;f__Thermomicrobiaceae;g__Sphaerobacter;
Candidatus_Entotheonella	0	0	0	0	0	0	0	0	0	0	0	0	0.000152678	0	0	0	0	0	0	0	k__Bacteria;p__Entotheonellaeota;c__Entotheonellia;o__Entotheonellales;f__Entotheonellaceae;g__Candidatus_Entotheonella;
Desulfobulbus	0	0	0	0	0	0	0	0	0	0	0	0	0.000267186	0	0	0	0	0	0	0	k__Bacteria;p__Desulfobacterota;c__Desulfobulbia;o__Desulfobulbales;f__Desulfobulbaceae;g__Desulfobulbus;
RBG-16-58-14	0	0	0	0	0	0.000229016	0	0	0	0	0	0	0.000190847	0	0	0	0	0	0	0	k__Bacteria;p__Chloroflexi;c__Anaerolineae;o__Anaerolineales;f__Anaerolineaceae;g__RBG-16-58-14;
Syntrophobacter	0	0	0	0	0	0	0	0	0	0	0	0	0	0	0	0	0	0	0	0	k__Bacteria;p__Desulfobacterota;c__Syntrophobacteria;o__Syntrophobacterales;f__Syntrophobacteraceae;g__Syntrophobacter;
Solitalea	0	0	0	0	0	0	0	0	0	0	3.81694e-05	0	0	0	0	0	0	0	0	0	k__Bacteria;p__Bacteroidota;c__Bacteroidia;o__Sphingobacteriales;f__Sphingobacteriaceae;g__Solitalea;
dgA-11_gut_group	0	0	0	3.81694e-05	0.000114508	0	0	0	0	0	0	0	0	0	0	0	0	3.81694e-05	0	0	k__Bacteria;p__Bacteroidota;c__Bacteroidia;o__Bacteroidales;f__Rikenellaceae;g__dgA-11_gut_group;
Mastigocladopsis_PCC-10914	0	0	0	0	0	0	0	0	0	0	0	0.000229016	0	0	0	0	0	0	0	0	k__Bacteria;p__Cyanobacteria;c__Cyanobacteriia;o__Cyanobacteriales;f__Nostocaceae;g__Mastigocladopsis_PCC-10914;
P3OB-42	0	0	0	0	0	3.81694e-05	0	0	3.81694e-05	0	0	3.81694e-05	0.000114508	0	0	0	0	0	0	7.63388e-05	k__Bacteria;p__Myxococcota;c__Myxococcia;o__Myxococcales;f__Myxococcaceae;g__P3OB-42;
Rhodobacter	0	0	0	0	0.000229016	0	0	0	0	0	0	0	0.000152678	0	0	0	0	0	0	0	k__Bacteria;p__Proteobacteria;c__Alphaproteobacteria;o__Rhodobacterales;f__Rhodobacteraceae;g__Rhodobacter;
Tychonema_CCAP_1459-11B	0	0	0	0	0	0	0	0	0	0	0	0	0	0	0	0	0	0	0	0	k__Bacteria;p__Cyanobacteria;c__Cyanobacteriia;o__Cyanobacteriales;f__Phormidiaceae;g__Tychonema_CCAP_1459-11B;
Roseomonas	0	0	0	0	0	0.000114508	0	0	0	0	0	3.81694e-05	0.000229016	0	0	0	0	0	0	0	k__Bacteria;p__Proteobacteria;c__Alphaproteobacteria;o__Acetobacterales;f__Acetobacteraceae;g__Roseomonas;
MM2	0	0	0	0	0	0.000114508	0	0	0	0	0	0	0	0	0	0	0	0	0	0	k__Bacteria;p__Proteobacteria;c__Gammaproteobacteria;o__Burkholderiales;f__Methylophilaceae;g__MM2;
Puia	0	0	0	0	0	0	0	0	0	0	0	0	0	0	0	0	0	0	0	0.000229016	k__Bacteria;p__Bacteroidota;c__Bacteroidia;o__Chitinophagales;f__Chitinophagaceae;g__Puia;
Psychrilyobacter	0	0	0	0	0	0	0	0	0	0	0	0	0	0	0	0	0	0	0	0	k__Bacteria;p__Fusobacteriota;c__Fusobacteriia;o__Fusobacteriales;f__Fusobacteriaceae;g__Psychrilyobacter;
Desulfobacca	0	0	0	0	0	0.000229016	0	0	0	0	0	0	7.63388e-05	0	0	0	0	0	0	0	k__Bacteria;p__Desulfobacterota;c__Desulfobaccia;o__Desulfobaccales;f__Desulfobaccaceae;g__Desulfobacca;
unidentified_Clostridia_vadinBB60_group	0	0	0	0	0	0	0	0	0	0	0	0	0	0	0	0	0	0	0	3.81694e-05	k__Bacteria;p__Firmicutes;c__Clostridia;o__Clostridia_vadinBB60_group;f__unidentified_Clostridia_vadinBB60_group;g__unidentified_Clostridia_vadinBB60_group;
Alkalibacterium	0	0	0	0	0	0	0	0	0	0	0	0	0	0	0	0	0	0	0	0	k__Bacteria;p__Firmicutes;c__Bacilli;o__Lactobacillales;f__Carnobacteriaceae;g__Alkalibacterium;
Lachnospiraceae_FCS020_group	0	7.63388e-05	0	0.000114508	0	0.000114508	7.63388e-05	0	0	3.81694e-05	0	0	0.000114508	3.81694e-05	3.81694e-05	0	0	0	0	0	k__Bacteria;p__Firmicutes;c__Clostridia;o__Lachnospirales;f__Lachnospiraceae;g__Lachnospiraceae_FCS020_group;
Desulfatitalea	0	0	0	0	0	0	0	0	0	0	0	0	0.000229016	0	0	0	0	0	0	0	k__Bacteria;p__Desulfobacterota;c__Desulfobacteria;o__Desulfobacterales;f__Desulfosarcinaceae;g__Desulfatitalea;
Georgenia	0	0	0	0	0	0	0	3.81694e-05	0	0	0.000114508	0	0	0	0	0	0	0	0	0	k__Bacteria;p__Actinobacteriota;c__Actinobacteria;o__Micrococcales;f__Bogoriellaceae;g__Georgenia;
Sellimonas	0	0	0	0	0	0	0	0	0	0	0	0	0	0	0	0	0	0	0	7.63388e-05	k__Bacteria;p__Firmicutes;c__Clostridia;o__Lachnospirales;f__Lachnospiraceae;g__Sellimonas;
Aurantisolimonas	0	0	0	0	0	0	0	0	0	0	0	0	0.000152678	0	0	0	0	0	0	0	k__Bacteria;p__Bacteroidota;c__Bacteroidia;o__Chitinophagales;f__Chitinophagaceae;g__Aurantisolimonas;
Limnobacter	0	0	0	0	0	0	0	0	0	0	0	0	0	0	0	0	0	0	0	3.81694e-05	k__Bacteria;p__Proteobacteria;c__Gammaproteobacteria;o__Burkholderiales;f__Burkholderiaceae;g__Limnobacter;
Psychrobacter	0	7.63388e-05	0	0	0	0	0	0	0	0	0	0	0	0	3.81694e-05	0	0	0	0	0	k__Bacteria;p__Proteobacteria;c__Gammaproteobacteria;o__Pseudomonadales;f__Moraxellaceae;g__Psychrobacter;
Candidatus_Paracaedibacter	0	0	0	0	3.81694e-05	0	0	0	0	0	0	0	0	0	0	0	0	0	0	0	k__Bacteria;p__Proteobacteria;c__Alphaproteobacteria;o__Paracaedibacterales;f__Paracaedibacteraceae;g__Candidatus_Paracaedibacter;
Hirschia	0	0	0	0	3.81694e-05	0	0	3.81694e-05	7.63388e-05	7.63388e-05	0.000229016	0	0.000114508	0	0	0	0	0	0	0	k__Bacteria;p__Proteobacteria;c__Alphaproteobacteria;o__Caulobacterales;f__Hyphomonadaceae;g__Hirschia;
Dielma	0	0	0	0	0	0	0	0	0	0	0	0	0	0	0	0	0	0	0	0	k__Bacteria;p__Firmicutes;c__Bacilli;o__Erysipelotrichales;f__Erysipelotrichaceae;g__Dielma;
[Ruminococcus]_gauvreauii_group	0	0	0	0	0	0	0	0	0	0	0	0	0	0	0	0	0	0	0	0	k__Bacteria;p__Firmicutes;c__Clostridia;o__Lachnospirales;f__Lachnospiraceae;g__[Ruminococcus]_gauvreauii_group;
Pelagibius	0	0	0	0	0	0	0	0.000114508	0	3.81694e-05	0	0	3.81694e-05	0	0	0	0	0	0	0	k__Bacteria;p__Proteobacteria;c__Alphaproteobacteria;o__Kiloniellales;f__Kiloniellaceae;g__Pelagibius;
Defluviicoccus	0	0	0	0	0	0	0	0	0	0	0	0	0.000152678	0	0	0	0	0	0	0	k__Bacteria;p__Proteobacteria;c__Alphaproteobacteria;o__Defluviicoccales;f__Defluviicoccaceae;g__Defluviicoccus;
Niastella	0	0	0	0	0	0	0	0	0	0	0	3.81694e-05	0	0	0	0	0	0	0	0	k__Bacteria;p__Bacteroidota;c__Bacteroidia;o__Chitinophagales;f__Chitinophagaceae;g__Niastella;
TM7a	0	0	0	0	0	0	0	0	0	0	0	0	0	0	0	0	0	0	0	0	k__Bacteria;p__unidentified_Bacteria;c__Saccharimonadia;o__Saccharimonadales;f__Saccharimonadaceae;g__TM7a;
Rhodococcus	0	0	0	0	0	0	0	0	0	0	0	0	0	0	0	0	0	3.81694e-05	0	0.000114508	k__Bacteria;p__Actinobacteriota;c__Actinobacteria;o__Corynebacteriales;f__Nocardiaceae;g__Rhodococcus;
Geobacter	0	0	0	0	0	0	0	0	0	0	0	0	0	0	0	0	0	0	0	0	k__Bacteria;p__Desulfobacterota;c__Desulfuromonadia;o__Geobacterales;f__Geobacteraceae;g__Geobacter;
Truepera	0	0	0	0	0	0	0	3.81694e-05	3.81694e-05	7.63388e-05	0	0	0	0	0	0	0	0	0	0	k__Bacteria;p__Deinococcota;c__Deinococci;o__Deinococcales;f__Trueperaceae;g__Truepera;
Flaviflexus	0	0	0	0	0	3.81694e-05	0	0	0	0	0	0	0	0	0	0	0	0	0	0	k__Bacteria;p__Actinobacteriota;c__Actinobacteria;o__Actinomycetales;f__Actinomycetaceae;g__Flaviflexus;
Rhodopseudomonas	0	0	0	0	0	0	0	0	0	0	0	0	0	0	0	0	0	0	0	0	k__Bacteria;p__Proteobacteria;c__Alphaproteobacteria;o__Rhizobiales;f__Xanthobacteraceae;g__Rhodopseudomonas;
Flexibacter	0	0	0	0	0	0	0	0	0	0	0	0	0	0	0	0	0	0	0	0	k__Bacteria;p__Bacteroidota;c__Bacteroidia;o__Cytophagales;f__Microscillaceae;g__Flexibacter;
Pontibacter	0	0	0	0	0	0	0	0	0	0	3.81694e-05	0	0.000190847	0	0	0	0	0	0	0	k__Bacteria;p__Bacteroidota;c__Bacteroidia;o__Cytophagales;f__Hymenobacteraceae;g__Pontibacter;
Thermomonas	0	0	0	0	0	0	0	0	0	0	0	0	0	0	0	0	0	0	0	0	k__Bacteria;p__Proteobacteria;c__Gammaproteobacteria;o__Xanthomonadales;f__Xanthomonadaceae;g__Thermomonas;
Lacibacter	0	0	0	0	0	0	0	0	0	0	0	0	3.81694e-05	0	0	0	0	0	0	0	k__Bacteria;p__Bacteroidota;c__Bacteroidia;o__Chitinophagales;f__Chitinophagaceae;g__Lacibacter;
Candidatus_Bacilloplasma	0	0	0	0	0	0	0	0	0	0	0	0	0	0	0	0	0	0	0	0	k__Bacteria;p__Firmicutes;c__Bacilli;o__Mycoplasmatales;f__Mycoplasmataceae;g__Candidatus_Bacilloplasma;
Eggerthella	0	0	0	0	3.81694e-05	0	0	0	0	0	0	0	0	0	7.63388e-05	0	0	0	0	0.000190847	k__Bacteria;p__Actinobacteriota;c__Coriobacteriia;o__Coriobacteriales;f__Eggerthellaceae;g__Eggerthella;
Dokdonella	0	0	0	0	0	0	0	0	0	3.81694e-05	7.63388e-05	0	0	0	0	0	0	0	0	0	k__Bacteria;p__Proteobacteria;c__Gammaproteobacteria;o__Xanthomonadales;f__Rhodanobacteraceae;g__Dokdonella;
unidentified_Alphaproteobacteria	0	0	0	0	0	0	0	0	0	3.81694e-05	0	0	0	0	0	0	0	0	0	0	k__Bacteria;p__unidentified_Bacteria;c__Alphaproteobacteria;o__unidentified_Alphaproteobacteria;f__unidentified_Alphaproteobacteria;g__unidentified_Alphaproteobacteria;
Aureimonas	0	0	0	0	0	3.81694e-05	0	0	0	0	0	0	0	0	0	0	0	0	0	0	k__Bacteria;p__Proteobacteria;c__Alphaproteobacteria;o__Rhizobiales;f__Rhizobiaceae;g__Aureimonas;
Phormidium_IAM_M-71	0	0	0	0	0	0	0	0	0	0	0	0	0	0	0	0	0	0	0	0	k__Bacteria;p__Cyanobacteria;c__Cyanobacteriia;o__Cyanobacteriales;f__Phormidiaceae;g__Phormidium_IAM_M-71;
Panacagrimonas	0	0	0	0	0	0	0	0	0	0	0	0	0	0	0	0	0	0	0	0	k__Bacteria;p__Proteobacteria;c__Gammaproteobacteria;o__Salinisphaerales;f__Solimonadaceae;g__Panacagrimonas;
Vulgatibacter	0	0	0	0	0	0	0	0	0	0	0	3.81694e-05	0	0	0	0	0	0	0	0.000190847	k__Bacteria;p__Myxococcota;c__Myxococcia;o__Myxococcales;f__Vulgatibacteraceae;g__Vulgatibacter;
Sinibacillus	0	0	0	0	0	0	0	0.000114508	0	0.000114508	0.000190847	0	0	0	0	0	0	0	0	0	k__Bacteria;p__Firmicutes;c__Bacilli;o__Bacillales;f__Bacillaceae;g__Sinibacillus;
Candidatus_Nitrosotenuis	0	0	0	0	0	0	0	3.81694e-05	3.81694e-05	7.63388e-05	3.81694e-05	0	0	0	0	0	0	0	0	0	k__Archaea;p__Crenarchaeota;c__Nitrososphaeria;o__Nitrosopumilales;f__Nitrosopumilaceae;g__Candidatus_Nitrosotenuis;
oc32	0	0	0	0	0	7.63388e-05	0	0	0	0	0	0	0.000190847	0	0	0	0	0	0	0	k__Bacteria;p__Proteobacteria;c__Gammaproteobacteria;o__Burkholderiales;f__Nitrosomonadaceae;g__oc32;
Ahniella	0	0	0	0	0	0	0	0	0	0.000114508	7.63388e-05	0	7.63388e-05	0	0	0	0	0	0	0	k__Bacteria;p__Proteobacteria;c__Gammaproteobacteria;o__Xanthomonadales;f__Rhodanobacteraceae;g__Ahniella;
Solibacillus	0	0	0	0	0	0	0	0	3.81694e-05	0	0	0	0	0	0	0	0	0	0	0	k__Bacteria;p__Firmicutes;c__Bacilli;o__Bacillales;f__Planococcaceae;g__Solibacillus;
Luteolibacter	0	0	0	0	0	0	0	0	0	0	0	0	3.81694e-05	0	0	0	0	0	0	0	k__Bacteria;p__Verrucomicrobiota;c__Verrucomicrobiae;o__Verrucomicrobiales;f__Rubritaleaceae;g__Luteolibacter;
ADurb.Bin118	0	0	0	0	0	0	0	0	0	0	0	0	0	0	0	0	0	0	0	0	k__Bacteria;p__Verrucomicrobiota;c__Verrucomicrobiae;o__Pedosphaerales;f__Pedosphaeraceae;g__ADurb.Bin118;
Candidatus_Nitrocosmicus	0	0	0	0	0	0	0	3.81694e-05	0	0	3.81694e-05	0.000190847	0	0	0	0	0	0	0	0	k__Archaea;p__Crenarchaeota;c__Nitrososphaeria;o__Nitrososphaerales;f__Nitrososphaeraceae;g__Candidatus_Nitrocosmicus;
Kingella	0	0	0	0	0	0	0	0	0	0	0	0	0	0	0	0	0	0	0	0	k__Bacteria;p__Proteobacteria;c__Gammaproteobacteria;o__Burkholderiales;f__Neisseriaceae;g__Kingella;
Thermomonospora	0	0	0	0	0	0	0	0	0	0	0	0	0	0	0	0	0	0	0	7.63388e-05	k__Bacteria;p__Actinobacteriota;c__Actinobacteria;o__Streptosporangiales;f__Thermomonosporaceae;g__Thermomonospora;
Sideroxydans	0	0	0	0	0	0	0	0	0	0	0	0	0.000190847	0	0	0	0	0	0	0	k__Bacteria;p__Proteobacteria;c__Gammaproteobacteria;o__Burkholderiales;f__Gallionellaceae;g__Sideroxydans;
Bauldia	0	0	0	0	0	0	0	0	3.81694e-05	0	7.63388e-05	0	3.81694e-05	0	0	0	0	0	0	0	k__Bacteria;p__Proteobacteria;c__Alphaproteobacteria;o__Rhizobiales;f__unidentified_Rhizobiales;g__Bauldia;
Leuconostoc	0	0	0.000152678	0	0	7.63388e-05	0	0	0	0	0	0	7.63388e-05	0	0	0	0.000152678	0.000152678	0	3.81694e-05	k__Bacteria;p__Firmicutes;c__Bacilli;o__Lactobacillales;f__Leuconostocaceae;g__Leuconostoc;
Virgisporangium	0	0	0	0	0	0	0	0	0	0	0	7.63388e-05	0	0	0	0	0	0	0	0	k__Bacteria;p__Actinobacteriota;c__Actinobacteria;o__Micromonosporales;f__Micromonosporaceae;g__Virgisporangium;
Methylotenera	0	0	0	0	0	0	0	3.81694e-05	0	7.63388e-05	0	0	0	0	0	0	0	0	0	0	k__Bacteria;p__Proteobacteria;c__Gammaproteobacteria;o__Burkholderiales;f__Methylophilaceae;g__Methylotenera;
Novibacillus	0	0	0	0	0	0	0	0	0	0	0	0	0	0	0	0	0	0	0	0	k__Bacteria;p__Firmicutes;c__Bacilli;o__Thermoactinomycetales;f__Thermoactinomycetaceae;g__Novibacillus;
Sporocytophaga	0	0	0	0	0	0	0	0	0	0	0	0	0	0	0	0	0	0	0	0	k__Bacteria;p__Bacteroidota;c__Bacteroidia;o__Cytophagales;f__Cytophagaceae;g__Sporocytophaga;
Longispora	0	0	0	0	0	0	0	0	0	0	0	0	7.63388e-05	0	0	0	0	0	0	7.63388e-05	k__Bacteria;p__Actinobacteriota;c__Actinobacteria;o__Micromonosporales;f__Micromonosporaceae;g__Longispora;
Tessaracoccus	0	0	0	0	0	0	0	0	0	0	0	0	0	0	0	0	0	0	0	0	k__Bacteria;p__Actinobacteriota;c__Actinobacteria;o__Propionibacteriales;f__Propionibacteriaceae;g__Tessaracoccus;
Ellin517	0	0	0	0	0	0	0	0	0	0	0	0	0	0	0	0	0	0	0	0	k__Bacteria;p__Verrucomicrobiota;c__Verrucomicrobiae;o__Pedosphaerales;f__Pedosphaeraceae;g__Ellin517;
[Eubacterium]_saphenum_group	0	0	0	0	0	0	0	0	0	0	0	0	0	0	0	0	0	0	0	0	k__Bacteria;p__Firmicutes;c__Clostridia;o__Peptostreptococcales-Tissierellales;f__Anaerovoracaceae;g__[Eubacterium]_saphenum_group;
Lechevalieria	0	0	0	0	0	0	0	7.63388e-05	3.81694e-05	0	7.63388e-05	0	0	0	0	0	0	0	0	7.63388e-05	k__Bacteria;p__Actinobacteriota;c__Actinobacteria;o__Pseudonocardiales;f__Pseudonocardiaceae;g__Lechevalieria;
Mailhella	0	0	0	0	0	0	0	0	0	0	0	7.63388e-05	0	0	0	0	0	0.000152678	0	0	k__Bacteria;p__Desulfobacterota;c__Desulfovibrionia;o__Desulfovibrionales;f__Desulfovibrionaceae;g__Mailhella;
Syntrophorhabdus	0	0	0	0	0	3.81694e-05	0	0	0	0	0	0	3.81694e-05	0	0	0	0	0	0	0	k__Bacteria;p__Desulfobacterota;c__Syntrophorhabdia;o__Syntrophorhabdales;f__Syntrophorhabdaceae;g__Syntrophorhabdus;
Gordonibacter	0	0	0.000114508	0	0	3.81694e-05	0	0	0	0	0	0	0	0	0	0	7.63388e-05	7.63388e-05	0	0	k__Bacteria;p__Actinobacteriota;c__Coriobacteriia;o__Coriobacteriales;f__Eggerthellaceae;g__Gordonibacter;
Pseudoflavitalea	0	0	0	0	0	0	0	0	0	0	0	0	0	0	0	0	0	0	0	0	k__Bacteria;p__Bacteroidota;c__Bacteroidia;o__Chitinophagales;f__Chitinophagaceae;g__Pseudoflavitalea;
Pseudohongiella	0	0	0	0	0	0	0	0	0	0	0	0	0.000190847	0	0	0	0	0	0	0	k__Bacteria;p__Proteobacteria;c__Gammaproteobacteria;o__Oceanospirillales;f__Pseudohongiellaceae;g__Pseudohongiella;
Haloplasma	0	0	0	0	0	0.000190847	0	0	0	0	0	0	0	0	0	0	0	0	0	0	k__Bacteria;p__Firmicutes;c__Bacilli;o__Haloplasmatales;f__Haloplasmataceae;g__Haloplasma;
Rubellimicrobium	0	0	0	0	0	0	0	0	0	0	0	0.000190847	0	0	0	0	0	0	0	0	k__Bacteria;p__Proteobacteria;c__Alphaproteobacteria;o__Rhodobacterales;f__Rhodobacteraceae;g__Rubellimicrobium;
Sedimentibacter	0	0	0	0	0	0	0	0	0	0	0	0	0	0	0	0	0	0	0	0	k__Bacteria;p__Firmicutes;c__Clostridia;o__Peptostreptococcales-Tissierellales;f__Sedimentibacteraceae;g__Sedimentibacter;
unidentified_Xanthomonadaceae	0	0	0	0	0	0	0	3.81694e-05	0	0	7.63388e-05	0	0	0	0	0	0	0	0	0	k__Bacteria;p__unidentified_Bacteria;c__Gammaproteobacteria;o__Xanthomonadales;f__Xanthomonadaceae;g__unidentified_Xanthomonadaceae;
Photobacterium	0	0	0	0	0	0	0	0	0	0	0	0	0	0	0	0	0	0	0	0	k__Bacteria;p__Proteobacteria;c__Gammaproteobacteria;o__Vibrionales;f__Vibrionaceae;g__Photobacterium;
Quadrisphaera	0	0	0	0	0	0	0	0.000152678	0	0	3.81694e-05	0	0	0	0	0	0	0	0	0	k__Bacteria;p__Actinobacteriota;c__Actinobacteria;o__Kineosporiales;f__Kineosporiaceae;g__Quadrisphaera;
Slackia	0	0	0	0	0	0	0	0	0	3.81694e-05	0	0	0	0	0	0	0	0	0	0	k__Bacteria;p__Actinobacteriota;c__Coriobacteriia;o__Coriobacteriales;f__Eggerthellaceae;g__Slackia;
Methyloceanibacter	0	0	0	0	0	0	0	0	0	0	0	0	3.81694e-05	0	0	0	0	0	0	0	k__Bacteria;p__Proteobacteria;c__Alphaproteobacteria;o__Rhizobiales;f__Methyloligellaceae;g__Methyloceanibacter;
Pseudoxanthomonas	0	0	0	0	0	3.81694e-05	0	0	0	3.81694e-05	0	0	0	0	0	0	0	0	0	0	k__Bacteria;p__Proteobacteria;c__Gammaproteobacteria;o__Xanthomonadales;f__Xanthomonadaceae;g__Pseudoxanthomonas;
[Anaerorhabdus]_furcosa_group	0	0	0	0	0	0	0	0	0	0	0	0	0	0	0	0	0	0	0	7.63388e-05	k__Bacteria;p__Firmicutes;c__Bacilli;o__Erysipelotrichales;f__Erysipelotrichaceae;g__[Anaerorhabdus]_furcosa_group;
Craurococcus-Caldovatus	0	0	0	0	0	0	0	3.81694e-05	0	0	0	0.000152678	0	0	0	0	0	0	0	3.81694e-05	k__Bacteria;p__Proteobacteria;c__Alphaproteobacteria;o__Acetobacterales;f__Acetobacteraceae;g__Craurococcus-Caldovatus;
Brevibacillus	0	0	0	0	0	0	0	0	0	0	0	0	0	0	0	0	0	0	0	0	k__Bacteria;p__Firmicutes;c__Bacilli;o__Brevibacillales;f__Brevibacillaceae;g__Brevibacillus;
Candidatus_Nitrosotalea	0	0	0	0	0	0	0	0	0	0	0	0	0	0	0	0	0	0	0	0	k__Archaea;p__Crenarchaeota;c__Nitrososphaeria;o__Nitrosotaleales;f__Nitrosotaleaceae;g__Candidatus_Nitrosotalea;
Cellulosimicrobium	0	0	0	0	0	0.000114508	0	0	0	0	0	0	0	0	0	0	0	0	0	0	k__Bacteria;p__Actinobacteriota;c__Actinobacteria;o__Micrococcales;f__Promicromonosporaceae;g__Cellulosimicrobium;
Modestobacter	0	0	0	0	0	0	0	7.63388e-05	0	0	7.63388e-05	0.000152678	0	0	0	0	0	0	0	0	k__Bacteria;p__Actinobacteriota;c__Actinobacteria;o__Frankiales;f__Geodermatophilaceae;g__Modestobacter;
IMCC26207	0	0	0	0	3.81694e-05	0	0	0	0	0	0	0	0	0	0	0	0	0	0	0.000114508	k__Bacteria;p__Actinobacteriota;c__Acidimicrobiia;o__Microtrichales;f__Microtrichaceae;g__IMCC26207;
unidentified_RF39	0	0	0	0	0	0	0	0	0	0	0	0	0	0	0	0	0	0	0	0	k__Bacteria;p__Firmicutes;c__Bacilli;o__RF39;f__unidentified_RF39;g__unidentified_RF39;
Methylobacillus	0	0	0	0	0	0	0	0	0	0	0	0	0	0	0	0	0	0	0	0	k__Bacteria;p__Proteobacteria;c__Gammaproteobacteria;o__Burkholderiales;f__Methylophilaceae;g__Methylobacillus;
Acholeplasma	0	0	0	0	0	0	0	0	0	0	0	0	0	0	0	0	0	0	0	0	k__Bacteria;p__Firmicutes;c__Bacilli;o__Acholeplasmatales;f__Acholeplasmataceae;g__Acholeplasma;
Parasegetibacter	0	0	0	0	0	3.81694e-05	0	0	0	0	0	7.63388e-05	3.81694e-05	0	0	0	0	0	0	0	k__Bacteria;p__Bacteroidota;c__Bacteroidia;o__Chitinophagales;f__Chitinophagaceae;g__Parasegetibacter;
Rhodovastum	0	0	0	0	0	0	0	0	0	0	0	0	0	0	0	0	0	0	0	0	k__Bacteria;p__Proteobacteria;c__Alphaproteobacteria;o__Acetobacterales;f__Acetobacteraceae;g__Rhodovastum;
Jeotgalibaca	0	0	0	0	0	0	0	0	0	0	3.81694e-05	0	0	0	0	0	3.81694e-05	0	0	0	k__Bacteria;p__Firmicutes;c__Bacilli;o__Lactobacillales;f__Carnobacteriaceae;g__Jeotgalibaca;
Amaricoccus	0	0	0	0	0	0	0	0	0	0	0	0	0	0	0	0	0	0	0	0	k__Bacteria;p__Proteobacteria;c__Alphaproteobacteria;o__Rhodobacterales;f__Rhodobacteraceae;g__Amaricoccus;
Hymenobacter	0	0	0	0	0	0	0	0	0	0	0	0	0	0	0	0	0	0	0	0	k__Bacteria;p__Bacteroidota;c__Bacteroidia;o__Cytophagales;f__Hymenobacteraceae;g__Hymenobacter;
Holdemania	0	0	0	0	0	0	0	0	0	0	0	3.81694e-05	0	0	0	0	7.63388e-05	0	0	3.81694e-05	k__Bacteria;p__Firmicutes;c__Bacilli;o__Erysipelotrichales;f__Erysipelotrichaceae;g__Holdemania;
Luteitalea	0	0	0	0	0	0.000114508	0	0	0	0	0	0	0	0	0	0	0	0	0	0	k__Bacteria;p__Acidobacteriota;c__Vicinamibacteria;o__Vicinamibacterales;f__Vicinamibacteraceae;g__Luteitalea;
Actinomadura	0	0	0	0	0	0	0	0	7.63388e-05	0	0	0	0	0	0	0	0	0	0	0.000152678	k__Bacteria;p__Actinobacteriota;c__Actinobacteria;o__Streptosporangiales;f__Thermomonosporaceae;g__Actinomadura;
Fastidiosipila	0	0	0	0	0	0	0	0	0	0	0	0	0	0	0	0	0	0	0	0	k__Bacteria;p__Firmicutes;c__Clostridia;o__unidentified_Clostridia;f__Hungateiclostridiaceae;g__Fastidiosipila;
Lacunisphaera	0	0	0	0	0	0	0	0	0	0	0	0	7.63388e-05	0	0	0	0	0	0	0	k__Bacteria;p__Verrucomicrobiota;c__Verrucomicrobiae;o__Opitutales;f__Opitutaceae;g__Lacunisphaera;
Salinispora	0	0	0	0	0	0	0	0	0	0	0	0	0	0	0	0	0	0	0	0.000152678	k__Bacteria;p__Actinobacteriota;c__Actinobacteria;o__Micromonosporales;f__Micromonosporaceae;g__Salinispora;
unidentified_Zixibacteria	0	0	0	0	0	0	0	0	0	0	0	0	0	0	0	0	0	0	0	0.000114508	k__Bacteria;p__Zixibacteria;c__unidentified_Zixibacteria;o__unidentified_Zixibacteria;f__unidentified_Zixibacteria;g__unidentified_Zixibacteria;
UBA6140	0	0	0	0	0	0	0	0	0	0	0	0	0	0	0	0	0	0	0	0.000152678	k__Bacteria;p__Proteobacteria;c__Gammaproteobacteria;o__Burkholderiales;f__Methylophilaceae;g__UBA6140;
Fournierella	0	0	0	7.63388e-05	0	0	0	0	0	0	0	3.81694e-05	0	0	0	0	0	3.81694e-05	0	3.81694e-05	k__Bacteria;p__Firmicutes;c__Clostridia;o__Oscillospirales;f__Ruminococcaceae;g__Fournierella;
Alkanibacter	0	0	0	0	0	0	0	0	0	0	0	0	0	0	0	0	0	0	0	0	k__Bacteria;p__Proteobacteria;c__Gammaproteobacteria;o__Salinisphaerales;f__Solimonadaceae;g__Alkanibacter;
Marinoscillum	0	0	0	0	0.000152678	0	0	0	0	0	0	0	0	0	0	0	0	0	0	0	k__Bacteria;p__Bacteroidota;c__Bacteroidia;o__Cytophagales;f__Cyclobacteriaceae;g__Marinoscillum;
Peredibacter	0	0	0	0	0	0	0	0	0	0	0	0	0.000152678	0	0	0	0	0	0	0	k__Bacteria;p__Bdellovibrionota;c__Bdellovibrionia;o__Bacteriovoracales;f__Bacteriovoracaceae;g__Peredibacter;
FFCH7168	0	0	0	0	0	0	0	0	0	0	0	3.81694e-05	0	0	0	0	0	0	0	3.81694e-05	k__Bacteria;p__Chloroflexi;c__Chloroflexia;o__Chloroflexales;f__Chloroflexaceae;g__FFCH7168;
SM1A02	0	0	0	0	0	0	0	0	0	0	0	0	0	0	0	0	0	0	0	0	k__Bacteria;p__Planctomycetota;c__Phycisphaerae;o__Phycisphaerales;f__Phycisphaeraceae;g__SM1A02;
Nitrosarchaeum	0	0	0	0	0	0	0	0.000152678	7.63388e-05	3.81694e-05	3.81694e-05	0	0	0	0	0	0	0	0	0	k__Archaea;p__Crenarchaeota;c__Nitrososphaeria;o__Nitrosopumilales;f__Nitrosopumilaceae;g__Nitrosarchaeum;
Cetobacterium	0	0	0	0	0	0	0	0	0	0	0	0	0	0	0	0	0	0	0	0	k__Bacteria;p__Fusobacteriota;c__Fusobacteriia;o__Fusobacteriales;f__Fusobacteriaceae;g__Cetobacterium;
Caldicoprobacter	0	0	0	0	0	0	0	0	0	0	0	0	0	0	0	0	0	0	0	0	k__Bacteria;p__Firmicutes;c__Clostridia;o__Caldicoprobacterales;f__Caldicoprobacteraceae;g__Caldicoprobacter;
unidentified_Vicinamibacterales	0	0	0	0	0	0	0	0	0	0	0	7.63388e-05	7.63388e-05	0	0	0	0	0	0	0	k__Bacteria;p__unidentified_Bacteria;c__Vicinamibacteria;o__Vicinamibacterales;f__unidentified_Vicinamibacterales;g__unidentified_Vicinamibacterales;
Chthonomonas	0	0	0	0	0	0	0	0	7.63388e-05	0	0	0	0	0	0	0	0	0	0	0	k__Bacteria;p__Armatimonadota;c__Chthonomonadetes;o__Chthonomonadales;f__Chthonomonadaceae;g__Chthonomonas;
Sphaerotilus	3.81694e-05	0	0	0	0	0	0.000152678	0	0	0	0	0	0	0	0	0	0	0	0	0	k__Bacteria;p__Proteobacteria;c__Gammaproteobacteria;o__Burkholderiales;f__Comamonadaceae;g__Sphaerotilus;
UCG-008	0	0	0	0	0	0	0	0	0	0	0	0	0	0	0	0	0	0	0	0.000152678	k__Bacteria;p__Firmicutes;c__Clostridia;o__Oscillospirales;f__Butyricicoccaceae;g__UCG-008;
possible_genus_04	0	0	0	0	0	0	0	0	0	0	0	0	3.81694e-05	0	0	0	0	0	0	3.81694e-05	k__Bacteria;p__Fibrobacterota;c__Fibrobacteria;o__Fibrobacterales;f__Fibrobacteraceae;g__possible_genus_04;
Anaerovorax	0	0.000114508	0	7.63388e-05	0	0	0	0	0	0	0	0	7.63388e-05	0	0	0	3.81694e-05	0	0	0	k__Bacteria;p__Firmicutes;c__Clostridia;o__Peptostreptococcales-Tissierellales;f__Anaerovoracaceae;g__Anaerovorax;
Scardovia	0	0	0	0	0	0	0	0	0	0	0	0	0	0	0	0	0	0	0	0	k__Bacteria;p__Actinobacteriota;c__Actinobacteria;o__Bifidobacteriales;f__Bifidobacteriaceae;g__Scardovia;
Sandaracinobacter	0	0	0	0	0	0	0	0	0	0	0	0	0	0	0	0	0	0	0	0	k__Bacteria;p__Proteobacteria;c__Alphaproteobacteria;o__Sphingomonadales;f__Sphingomonadaceae;g__Sandaracinobacter;
Cellvibrio	0	0	0	0	0	0	0	0	0	0	0	0	7.63388e-05	0	0	0	0	0	0	3.81694e-05	k__Bacteria;p__Proteobacteria;c__Gammaproteobacteria;o__Cellvibrionales;f__Cellvibrionaceae;g__Cellvibrio;
Anaerocella	0	0	0	0	0	0	0	0	0	0	0	0	0	0	0	0	0	0	0	0	k__Bacteria;p__Bacteroidota;c__Bacteroidia;o__Bacteroidales;f__Rikenellaceae;g__Anaerocella;
Alkalicoccus	0	0	0	0	0	0	0	0	0	0	0	0	0	0	0	0	0	0	0	0	k__Bacteria;p__Firmicutes;c__Bacilli;o__Bacillales;f__Salisediminibacteriaceae;g__Alkalicoccus;
GWD2-49-16	0	0	0	0	0	3.81694e-05	0	0	0	0	0	0	0	0	0	0	0	0	0	0	k__Bacteria;p__Chloroflexi;c__Anaerolineae;o__Anaerolineales;f__Anaerolineaceae;g__GWD2-49-16;
Haloactinopolyspora	0	0	0	0	0	0	0	0	0	0	0	0	0	0	0	0	0	0	0	0	k__Bacteria;p__Actinobacteriota;c__Actinobacteria;o__Propionibacteriales;f__Propionibacteriaceae;g__Haloactinopolyspora;
Dactylosporangium	0	0	0	0	0	0	0	0	0	0	0	3.81694e-05	0	0	0	0	0	0	0	0	k__Bacteria;p__Actinobacteriota;c__Actinobacteria;o__Micromonosporales;f__Micromonosporaceae;g__Dactylosporangium;
unidentified_Nitrospiraceae	0	0	0	0	0	3.81694e-05	0	3.81694e-05	7.63388e-05	0	0	7.63388e-05	0	0	0	0	0	0	0	0	k__Bacteria;p__Nitrospirota;c__Nitrospira;o__Nitrospirales;f__Nitrospiraceae;g__unidentified_Nitrospiraceae;
[Eubacterium]_ruminantium_group	0	0	0	0	0	0	0	0	0	0	0	0	0	0	0	0	0	0	0	0	k__Bacteria;p__Firmicutes;c__Clostridia;o__Lachnospirales;f__Lachnospiraceae;g__[Eubacterium]_ruminantium_group;
Thermoflexus	0	0	0	0	0	0	0	0	0	0	0	0	0	0	0	0	0	0	0	0	k__Bacteria;p__Chloroflexi;c__Anaerolineae;o__Thermoflexales;f__Thermoflexaceae;g__Thermoflexus;
unidentified_Marinococcaceae	0	0	0	0	0	0	0	0	0	0	0	0	0	0	0	0	0	0	0	0	k__Bacteria;p__Firmicutes;c__Bacilli;o__Bacillales;f__Marinococcaceae;g__unidentified_Marinococcaceae;
Microcoleus_Es-Yyy1400	0	0	0	0	0	0	0	0	0	0	0	0	0	0	0	0	0	0	0	0	k__Bacteria;p__Cyanobacteria;c__Cyanobacteriia;o__Cyanobacteriales;f__Coleofasciculaceae;g__Microcoleus_Es-Yyy1400;
Aliicoccus	0	0	0	0	0	0	0	0	0	0	0	0	0	0	0	0	0	0	0	0	k__Bacteria;p__Firmicutes;c__Bacilli;o__Staphylococcales;f__Staphylococcaceae;g__Aliicoccus;
Lewinella	0	0	0	0	0	0	0	0	0	0	0	0	0.000114508	0	0	0	0	0	0	0	k__Bacteria;p__Bacteroidota;c__Bacteroidia;o__Chitinophagales;f__Saprospiraceae;g__Lewinella;
Candidatus_Nitrotoga	0	0	0	0	0	3.81694e-05	0	0	0	0	0	0	0	0	0	0	0	0	0	0	k__Bacteria;p__Proteobacteria;c__Gammaproteobacteria;o__Burkholderiales;f__Gallionellaceae;g__Candidatus_Nitrotoga;
Marinospirillum	0	0	0	0	0	0	0	0	0	0	0	0	0	0	0	0	0	0	0	0	k__Bacteria;p__Proteobacteria;c__Gammaproteobacteria;o__Oceanospirillales;f__Halomonadaceae;g__Marinospirillum;
Candidatus_Ovatusbacter	0	0	0	0	0	0	0	0	0	0	0.000152678	0	0	0	0	0	0	0	0	0	k__Bacteria;p__Proteobacteria;c__Gammaproteobacteria;o__unidentified_Gammaproteobacteria;f__unidentified_Gammaproteobacteria;g__Candidatus_Ovatusbacter;
CAG-873	0	0	0	0	0	0	0	0	0	0	0	0	0	0	0	0	0	3.81694e-05	0	3.81694e-05	k__Bacteria;p__Bacteroidota;c__Bacteroidia;o__Bacteroidales;f__Muribaculaceae;g__CAG-873;
IheB3-7	0	0	0	0	0	0	0	0	0	0	0	0	0	0	0	0	0	0	0	0.000152678	k__Bacteria;p__Bacteroidota;c__Ignavibacteria;o__Ignavibacteriales;f__Melioribacteraceae;g__IheB3-7;
Ferrovibrio	0	0	0	0	0	0	0	0	0	3.81694e-05	3.81694e-05	0	7.63388e-05	0	0	0	0	0	0	7.63388e-05	k__Bacteria;p__Proteobacteria;c__Alphaproteobacteria;o__Ferrovibrionales;f__Ferrovibrionaceae;g__Ferrovibrio;
Thermoanaerobaculum	0	0	0	0	0	7.63388e-05	0	0	0	0	0	0	3.81694e-05	0	0	0	0	0	0	0	k__Bacteria;p__Acidobacteriota;c__Thermoanaerobaculia;o__Thermoanaerobaculales;f__Thermoanaerobaculaceae;g__Thermoanaerobaculum;
Christensenella	0	0	0	0	0	0	0	0	0	0	0	0	0	0	0	0	0	0	0	0	k__Bacteria;p__Firmicutes;c__Clostridia;o__Christensenellales;f__Christensenellaceae;g__Christensenella;
Verticiella	0	0	0	0	0	0	0	0	0	0	0	0	0	0	0	0	0	0	0	0	k__Bacteria;p__Proteobacteria;c__Gammaproteobacteria;o__Burkholderiales;f__Alcaligenaceae;g__Verticiella;
Nakamurella	0	0	0	0	0	0	0	0	0	0	0	0	0	0	0	0	0	0	0	0	k__Bacteria;p__Actinobacteriota;c__Actinobacteria;o__Frankiales;f__Nakamurellaceae;g__Nakamurella;
Papillibacter	0	0	3.81694e-05	7.63388e-05	0	3.81694e-05	0.000114508	0	0	0	0	0	0	0	3.81694e-05	7.63388e-05	0	0	0	0	k__Bacteria;p__Firmicutes;c__Clostridia;o__Oscillospirales;f__Oscillospiraceae;g__Papillibacter;
JdFR-76	0	0	0	0	0	0.000114508	0	0	0	0	0	0	0	0	0	0	0	0	0	0	k__Bacteria;p__Calditrichota;c__Calditrichia;o__Calditrichales;f__Calditrichaceae;g__JdFR-76;
unidentified_WWE3	0	0	0	0	0	0	0	3.81694e-05	0	0	0	0	0	0	0	0	0	0	0	0	k__Bacteria;p__unidentified_Bacteria;c__WWE3;o__unidentified_WWE3;f__unidentified_WWE3;g__unidentified_WWE3;
wb1-A12	0	0	0	0	0	0	0	0	0	0	0	0	0	0	0	0	0	0	0	0	k__Bacteria;p__Methylomirabilota;c__Methylomirabilia;o__Methylomirabilales;f__Methylomirabilaceae;g__wb1-A12;
Oceanobacter	0	0	0	0	0	0	0	0	0	0	0	0	0	0	0	0	0	0	0	0	k__Bacteria;p__Proteobacteria;c__Gammaproteobacteria;o__Oceanospirillales;f__Saccharospirillaceae;g__Oceanobacter;
Helcococcus	0	0	0	0	0	0	0	0	0	0	0	0	0	0	0	0	0	0	0	0	k__Bacteria;p__Firmicutes;c__Clostridia;o__Peptostreptococcales-Tissierellales;f__unidentified_Peptostreptococcales-Tissierellales;g__Helcococcus;
Desulfosporosinus	0	0	0	0	0	0	0	0	0	0	0	0	0	0	0	0	0	0	0	0	k__Bacteria;p__Firmicutes;c__Desulfitobacteriia;o__Desulfitobacteriales;f__Desulfitobacteriaceae;g__Desulfosporosinus;
[Bacteroides]_pectinophilus_group	0	0	0	0	0	0	0	0	0	0	0	0	0	0	0	0	0	0	0	0	k__Bacteria;p__Firmicutes;c__Clostridia;o__Lachnospirales;f__Lachnospiraceae;g__[Bacteroides]_pectinophilus_group;
Ensifer	0	0	0	0	0	0	0	3.81694e-05	3.81694e-05	0	0	0	3.81694e-05	0	0	0	0	0	0	0	k__Bacteria;p__Proteobacteria;c__Alphaproteobacteria;o__Rhizobiales;f__Rhizobiaceae;g__Ensifer;
Actinocorallia	0	0	0	0	0	0	0	0	3.81694e-05	3.81694e-05	0	0	0	0	0	0	0	0	0	0	k__Bacteria;p__Actinobacteriota;c__Actinobacteria;o__Streptosporangiales;f__Thermomonosporaceae;g__Actinocorallia;
Hypnocyclicus	0	0	0	0	0	0	0	0	0	0	0	0	0	0	0	0	0	0	0	0	k__Bacteria;p__Fusobacteriota;c__Fusobacteriia;o__Fusobacteriales;f__Leptotrichiaceae;g__Hypnocyclicus;
Luteibacter	0	0	0.000114508	0	0	0	0	0	0	0	0	0	0	0	0	0	0	0	0	0	k__Bacteria;p__Proteobacteria;c__Gammaproteobacteria;o__Xanthomonadales;f__Rhodanobacteraceae;g__Luteibacter;
Negativicoccus	0	0	0	0	0	0	0	0	0	0	0	0	0	0	0	0	0	0	0	0	k__Bacteria;p__Firmicutes;c__Negativicutes;o__Veillonellales-Selenomonadales;f__Veillonellaceae;g__Negativicoccus;
OM60(NOR5)_clade	0	0	0	0	0	0	0	0	0	0	0	0	0.000114508	0	0	0	0	0	0	0	k__Bacteria;p__Proteobacteria;c__Gammaproteobacteria;o__Cellvibrionales;f__Halieaceae;g__OM60(NOR5)_clade;
Sphingobacterium	0	0	0	0	0	0	7.63388e-05	0	0	0	0	0	0	0	0	0	0	0	0	0	k__Bacteria;p__Bacteroidota;c__Bacteroidia;o__Sphingobacteriales;f__Sphingobacteriaceae;g__Sphingobacterium;
Abditibacterium	0	0	0	0	0	0	0	0	0	0	0	0	0	0	0	0	0	0	0	0	k__Bacteria;p__Abditibacteriota;c__Abditibacteria;o__Abditibacteriales;f__Abditibacteriaceae;g__Abditibacterium;
RBG-16-49-21	0	0	0	0	0	0	0	0	0	0	0	0	0	0	0	0	0	0	0	0	k__Bacteria;p__Spirochaetota;c__Leptospirae;o__Leptospirales;f__Leptospiraceae;g__RBG-16-49-21;
Guggenheimella	0	0	0	0	0	0	0	0	0	0	0	0	0	0	0	0	0	0	0	0	k__Bacteria;p__Firmicutes;c__Clostridia;o__Peptostreptococcales-Tissierellales;f__unidentified_Peptostreptococcales-Tissierellales;g__Guggenheimella;
Candidatus_Jidaibacter	0	0	0	0	0	0	0	0	0	0	0	0	0	0	0	0	0	0	0	0	k__Bacteria;p__Proteobacteria;c__Alphaproteobacteria;o__Rickettsiales;f__unidentified_Rickettsiales;g__Candidatus_Jidaibacter;
Sedimentitalea	0	0	0	0	0	0	0	0	0	0	0	0	0	0	0	0	0	0	0	0	k__Bacteria;p__Proteobacteria;c__Alphaproteobacteria;o__Rhodobacterales;f__Rhodobacteraceae;g__Sedimentitalea;
Glycomyces	0	0	0	0	0	0	0	0	3.81694e-05	0	0	0	0	0	0	0	0	0	0	0	k__Bacteria;p__Actinobacteriota;c__Actinobacteria;o__Glycomycetales;f__Glycomycetaceae;g__Glycomyces;
Sulfuricurvum	0	0	0	0	7.63388e-05	0	0	0	0	0	0	0	0	0	0	0	0	0	0	0	k__Bacteria;p__Campilobacterota;c__Campylobacteria;o__Campylobacterales;f__Sulfurimonadaceae;g__Sulfuricurvum;
Citrifermentans	0	0	0	0	0	0	0	0	0	0	0	0	0	0	0	0	0	0	0	0	k__Bacteria;p__Desulfobacterota;c__Desulfuromonadia;o__Geobacterales;f__Geobacteraceae;g__Citrifermentans;
Sediminibacterium	0	0	0	0	0	0	0	0	0	0	0	0	3.81694e-05	0	0	0	0	0	0	0	k__Bacteria;p__Bacteroidota;c__Bacteroidia;o__Chitinophagales;f__Chitinophagaceae;g__Sediminibacterium;
Cutibacterium	0	0	0	0	0	0	0	0	0	0	0	0	0	0	0	0	0	0	0	0	k__Bacteria;p__Actinobacteriota;c__Actinobacteria;o__Propionibacteriales;f__Propionibacteriaceae;g__Cutibacterium;
Succinivibrio	0	0	0	0	0	0	0	0	0	0	0	0	0	0	0	0	0	0	0	0	k__Bacteria;p__Proteobacteria;c__Gammaproteobacteria;o__Aeromonadales;f__Succinivibrionaceae;g__Succinivibrio;
Nocardiopsis	0	0	0	0	0	0	0	0	0	0	0	0	0	0	0	0	0	0	0	0	k__Bacteria;p__Actinobacteriota;c__Actinobacteria;o__Streptosporangiales;f__Nocardiopsaceae;g__Nocardiopsis;
Taibaiella	0	0	0	0	0	0	0	0	0	0	0	0	0	0	0	0	0	0	0	0.000114508	k__Bacteria;p__Bacteroidota;c__Bacteroidia;o__Chitinophagales;f__Chitinophagaceae;g__Taibaiella;
TPD-58	0	0	0	0	0	0	0	0	0	0	0	0	0	0	0	0	0	0	0	0	k__Bacteria;p__Acidobacteriota;c__Thermoanaerobaculia;o__Thermoanaerobaculales;f__Thermoanaerobaculaceae;g__TPD-58;
W5053	0	0	0	0	0	0	0	0	0	0	0	0	0	0	0	0	0	0	0	0	k__Bacteria;p__Firmicutes;c__Clostridia;o__Peptostreptococcales-Tissierellales;f__unidentified_Peptostreptococcales-Tissierellales;g__W5053;
Cephaloticoccus	0	0	0	0	3.81694e-05	0	0	0	0	0	0	0	0	0	0	0	0	0	0	0	k__Bacteria;p__Verrucomicrobiota;c__Verrucomicrobiae;o__Opitutales;f__Opitutaceae;g__Cephaloticoccus;
Brevibacterium	0	0	0	0	0	0	0	0	0	0	0	0	0	0	0	0	0	0	0	0	k__Bacteria;p__Actinobacteriota;c__Actinobacteria;o__Micrococcales;f__Brevibacteriaceae;g__Brevibacterium;
Delftia	0	0	0	0	0	0	0	0	0	0	0	0	0	0	0	0	0	0	0	0	k__Bacteria;p__Proteobacteria;c__Gammaproteobacteria;o__Burkholderiales;f__Comamonadaceae;g__Delftia;
Longilinea	0	0	0	0	0	3.81694e-05	0	0	0	0	0	0	0	0	0	0	0	0	0	0	k__Bacteria;p__Chloroflexi;c__Anaerolineae;o__Anaerolineales;f__Anaerolineaceae;g__Longilinea;
unidentified_Calditrichaceae	0	0	0	0	0	0	0	0	0	0	0	0	0	0	0	0	0	0	0	0	k__Bacteria;p__Calditrichota;c__Calditrichia;o__Calditrichales;f__Calditrichaceae;g__unidentified_Calditrichaceae;
Hydrogenoanaerobacterium	0	0	0	3.81694e-05	0	0	0	0	0	0	0	0	0	0.000114508	0	0	0	0	0	0	k__Bacteria;p__Firmicutes;c__Clostridia;o__Oscillospirales;f__unidentified_Oscillospirales;g__Hydrogenoanaerobacterium;
Wolinella	0	0	0	0	0	0	0	0	0	0	0	0	0	0	0	0	0	0	0	0	k__Bacteria;p__Campilobacterota;c__Campylobacteria;o__Campylobacterales;f__Helicobacteraceae;g__Wolinella;
JGI_0001001-H03	0	0	0	0	0	0	0	0	0	0	0	0	0	0	0	0	0	0	0	0	k__Bacteria;p__Acidobacteriota;c__Blastocatellia;o__Blastocatellales;f__Blastocatellaceae;g__JGI_0001001-H03;
Proteocatella	0	0	0	0	0	0	0	0	0	0	0	0	0	0	0	0	0	0	0	0	k__Bacteria;p__Firmicutes;c__Clostridia;o__Peptostreptococcales-Tissierellales;f__Peptostreptococcaceae;g__Proteocatella;
Pelolinea	0	0	0	0	0	0	0	0	0	0	0	0	0.000114508	0	0	0	0	0	0	3.81694e-05	k__Bacteria;p__Chloroflexi;c__Anaerolineae;o__Anaerolineales;f__Anaerolineaceae;g__Pelolinea;
Proteiniclasticum	0	0	0	0	0	0	0	0	0	0	0	0	0	0	0	0	0	0	0	0	k__Bacteria;p__Firmicutes;c__Clostridia;o__Clostridiales;f__Clostridiaceae;g__Proteiniclasticum;
Niveispirillum	3.81694e-05	0.000114508	0	0	0	0	3.81694e-05	0	0	0	0	0	0	7.63388e-05	0	0	0	0	0	0	k__Bacteria;p__Proteobacteria;c__Alphaproteobacteria;o__Azospirillales;f__Azospirillaceae;g__Niveispirillum;
Anaerobiospirillum	0	0	0	0	0	0	0	0	0	0	0	0	0	0	0	0	0	0	0	0	k__Bacteria;p__Proteobacteria;c__Gammaproteobacteria;o__Aeromonadales;f__Succinivibrionaceae;g__Anaerobiospirillum;
Cupriavidus	0	0	0	0	0	0	0	0	0	0	0	0	0	0	0	0	0	0	0	0	k__Bacteria;p__Proteobacteria;c__Gammaproteobacteria;o__Burkholderiales;f__Burkholderiaceae;g__Cupriavidus;
Leptolyngbya_EcFYyyy-00	0	0	0	0	0	0	0	0	0	0	0	0	0	0	0	0	0	0	0	0	k__Bacteria;p__Cyanobacteria;c__Cyanobacteriia;o__unidentified_Cyanobacteriia;f__unidentified_Cyanobacteriia;g__Leptolyngbya_EcFYyyy-00;
unidentified_RBG-13-46-9	0	0	0	0	0	0	0	0	0	0	0	0	0	0	0	0	0	0	0	0	k__Bacteria;p__Chloroflexi;c__Dehalococcoidia;o__RBG-13-46-9;f__unidentified_RBG-13-46-9;g__unidentified_RBG-13-46-9;
Vagococcus	0	0	0	0	0	0	0	0	0	0	0	0	7.63388e-05	0	0	0	3.81694e-05	0	0	0	k__Bacteria;p__Firmicutes;c__Bacilli;o__Lactobacillales;f__Vagococcaceae;g__Vagococcus;
unidentified_TK10	0	0	0	0	0	0	0	0	0	0	0	0	0	0	0	0	0	0	0	0	k__Bacteria;p__Chloroflexi;c__TK10;o__unidentified_TK10;f__unidentified_TK10;g__unidentified_TK10;
unidentified_NS11-12_marine_group	0	0	0	0	0	0	0	0	0	0	0	0	0	0	0	0	0	0	0	0	k__Bacteria;p__Bacteroidota;c__Bacteroidia;o__Sphingobacteriales;f__NS11-12_marine_group;g__unidentified_NS11-12_marine_group;
unidentified_F082	0	0	0	0	0	0	0	0	0	0	0	0	0	0	0	0	0	0	0	0	k__Bacteria;p__Bacteroidota;c__Bacteroidia;o__Bacteroidales;f__F082;g__unidentified_F082;
Macrococcus	0	0	0	0	0	0	0	0	0	0	0	0	0	0	0	0	0	0	0	0	k__Bacteria;p__Firmicutes;c__Bacilli;o__Staphylococcales;f__Staphylococcaceae;g__Macrococcus;
Turneriella	0	0	0	0	0	0	0	0	0	0	0	0	0	0	0	0	0	0	0	0	k__Bacteria;p__Spirochaetota;c__Leptospirae;o__Leptospirales;f__Leptospiraceae;g__Turneriella;
unidentified_Syntrophobacterales	0	0	0	0	0	0	0	0	0	0	0	0	0	0	0	0	0	0	0	0	k__Bacteria;p__unidentified_Bacteria;c__Syntrophobacteria;o__Syntrophobacterales;f__unidentified_Syntrophobacterales;g__unidentified_Syntrophobacterales;
Lacticigenium	0	0	0	0	0	0	0	0	0	0	0	0	0	0	0	0	0	0	0	0	k__Bacteria;p__Firmicutes;c__Bacilli;o__Lactobacillales;f__Carnobacteriaceae;g__Lacticigenium;
Raoultibacter	0	0	0	0	0	0	0	0	0	0	0	0	0	0	0	0	0	0	0	0	k__Bacteria;p__Actinobacteriota;c__Coriobacteriia;o__Coriobacteriales;f__unidentified_Coriobacteriales;g__Raoultibacter;
Ignavigranum	0	0	0	0	0	0	0	0	0	0	0	0	0	3.81694e-05	0	0	0	0	0	0	k__Bacteria;p__Firmicutes;c__Bacilli;o__Lactobacillales;f__Aerococcaceae;g__Ignavigranum;
Rummeliibacillus	0	0	0	0	0	0	0	0	0	3.81694e-05	0	0	0	0	0	0	0	0	0	0	k__Bacteria;p__Firmicutes;c__Bacilli;o__Bacillales;f__Planococcaceae;g__Rummeliibacillus;
Planifilum	0	0	0	0	0	0	0	0	0	0	0	0	0	0	0	0	0	0	0	0	k__Bacteria;p__Firmicutes;c__Bacilli;o__Thermoactinomycetales;f__Thermoactinomycetaceae;g__Planifilum;
[Aquaspirillum]_arcticum_group	0	0	0	0	0	0	0	0	0	0	0	0	0	3.81694e-05	0	0	0	0	0	0	k__Bacteria;p__Proteobacteria;c__Gammaproteobacteria;o__Burkholderiales;f__Oxalobacteraceae;g__[Aquaspirillum]_arcticum_group;
alphaI_cluster	0	0	0	0	0	0	0	0	0	0	0	0.000114508	0	0	0	0	0	0	0	0	k__Bacteria;p__Proteobacteria;c__Alphaproteobacteria;o__Rhizobiales;f__Beijerinckiaceae;g__alphaI_cluster;
Gemmata	0	0	0	0	0	0	0	0	0	0	0	0	0	0	0	0	0	0	0	0	k__Bacteria;p__Planctomycetes;c__unidentified_Planctomycetes;o__Gemmatales;f__Gemmataceae;g__Gemmata;
Uruburuella	0	0	0	0	0	0	0	0	0	0	0	0	0	0	0	0	0	0	0	0	k__Bacteria;p__Proteobacteria;c__Gammaproteobacteria;o__Burkholderiales;f__Neisseriaceae;g__Uruburuella;
Calorithrix	0	0	0	0	0	0.000114508	0	0	0	0	0	0	0	0	0	0	0	0	0	0	k__Bacteria;p__Calditrichota;c__Calditrichia;o__Calditrichales;f__Calditrichaceae;g__Calorithrix;
Syntrophotalea	0	0	0	0	0	0	0	0	0	0	0	0	0	0	0	0	0	0	0	0	k__Bacteria;p__Desulfobacterota;c__Desulfuromonadia;o__unidentified_Desulfuromonadia;f__Syntrophotaleaceae;g__Syntrophotalea;
Magnetovibrio	0	0	0	0	0	0	0	0	0	0	0	0	0.000114508	0	0	0	0	0	0	0	k__Bacteria;p__Proteobacteria;c__Alphaproteobacteria;o__Rhodospirillales;f__Magnetospiraceae;g__Magnetovibrio;
Paenalcaligenes	0	0	7.63388e-05	0	0	0	0	0	0	0	0	0	0	0	0	0	0	0	0	0	k__Bacteria;p__Proteobacteria;c__Gammaproteobacteria;o__Burkholderiales;f__Alcaligenaceae;g__Paenalcaligenes;
Microbulbifer	0	0	0	0	0	0	0	0	0	0	0	0	0	0	0	0	0	0	0	0	k__Bacteria;p__Proteobacteria;c__Gammaproteobacteria;o__Cellvibrionales;f__Microbulbiferaceae;g__Microbulbifer;
JTB255_marine_benthic_group	0	0	0	0	0	0	0	0	0	0	0	0	0	0	0	0	0	0	0	0	k__Bacteria;p__Proteobacteria;c__Gammaproteobacteria;o__Steroidobacterales;f__Woeseiaceae;g__JTB255_marine_benthic_group;
ANME-3	0	0	0	0	0	0	0	0	0	0	0	0	0	0	0	0	0	3.81694e-05	0	3.81694e-05	k__Archaea;p__Halobacterota;c__Methanosarcinia;o__Methanosarciniales;f__Methanosarcinaceae;g__ANME-3;
Amycolatopsis	0	0	0	0	0	0	0	0	7.63388e-05	0	0	0	0	0	0	0	0	0	0	0	k__Bacteria;p__Actinobacteriota;c__Actinobacteria;o__Pseudonocardiales;f__Pseudonocardiaceae;g__Amycolatopsis;
Acetobacteroides	0	0	0	0	0	0	0	0	0	0	0	0	7.63388e-05	0	0	0	0	0	0	0	k__Bacteria;p__Bacteroidota;c__Bacteroidia;o__Bacteroidales;f__Williamwhitmaniaceae;g__Acetobacteroides;
UCG-001	0	0	0	0	0	0	0	0	0	0	0	0	0	0	0	0	0	0	0	0	k__Bacteria;p__Firmicutes;c__Clostridia;o__Oscillospirales;f__Ruminococcaceae;g__UCG-001;
Candidatus_Nitrosopumilus	0	0	0	0	0	0	0	0	0	0	0	0	0	0	0	0	0	0	0	0	k__Archaea;p__Crenarchaeota;c__Nitrososphaeria;o__Nitrosopumilales;f__Nitrosopumilaceae;g__Candidatus_Nitrosopumilus;
Rhizocola	0	0	0	0	0	0	0	0	0	0	0	0	0	0	0	0	0	0	0	0	k__Bacteria;p__Actinobacteriota;c__Actinobacteria;o__Micromonosporales;f__Micromonosporaceae;g__Rhizocola;
UCG-004	0	0	0	0	7.63388e-05	0	0	0	0	0	0	0.000114508	0	0	0	0	0	0	0	0	k__Bacteria;p__Firmicutes;c__Bacilli;o__Erysipelotrichales;f__Erysipelatoclostridiaceae;g__UCG-004;
Methylomonas	0	0	0	0	0.000114508	0	0	0	0	0	0	0	0	0	0	0	0	0	0	0	k__Bacteria;p__Proteobacteria;c__Gammaproteobacteria;o__Methylococcales;f__Methylomonadaceae;g__Methylomonas;
Permianibacter	0	0	0	0	0	0	0	0	0	0	0	0	3.81694e-05	0	0	0	0	0	0	0	k__Bacteria;p__Proteobacteria;c__Gammaproteobacteria;o__Pseudomonadales;f__Moraxellaceae;g__Permianibacter;
Smithella	0	0	0	0	0	0	0	0	0	0	0	0	0	0	0	0	0	0	0	0	k__Bacteria;p__Desulfobacterota;c__Syntrophia;o__Syntrophales;f__Smithellaceae;g__Smithella;
Sumerlaea	0	0	0	0	0	0	0	0	0	0	0	0	3.81694e-05	0	0	0	0	0	0	0	k__Bacteria;p__Sumerlaeota;c__Sumerlaeia;o__Sumerlaeales;f__Sumerlaeaceae;g__Sumerlaea;
Candidatus_Nitrososphaera	0	0	0	0	0	0	0	0	7.63388e-05	0	7.63388e-05	0	0	0	0	0	0	0	0	0	k__Archaea;p__Crenarchaeota;c__Nitrososphaeria;o__Nitrososphaerales;f__Nitrososphaeraceae;g__Candidatus_Nitrososphaera;
unidentified_Candidatus_Yanofskybacteria	0	0	0	0	0	0	0	0	0	0	0	0	0	0	0	0	0	0	0	3.81694e-05	k__Bacteria;p__Candidatus_Yanofskybacteria;c__unidentified_Candidatus_Yanofskybacteria;o__unidentified_Candidatus_Yanofskybacteria;f__unidentified_Candidatus_Yanofskybacteria;g__unidentified_Candidatus_Yanofskybacteria;
Ferruginibacter	0	0	0	0	0	0	0	0	0	0	0	0	0	0	0	0	0	0	0	0	k__Bacteria;p__Bacteroidota;c__Bacteroidia;o__Chitinophagales;f__Chitinophagaceae;g__Ferruginibacter;
Terrimicrobium	0	0	0	0	0	0	0	0	0	0	0	0	0	0	0	0	0	0	0	0	k__Bacteria;p__Verrucomicrobiota;c__Verrucomicrobiae;o__Chthoniobacterales;f__Terrimicrobiaceae;g__Terrimicrobium;
Opitutus	0	0	0	0	0	0	0	0	3.81694e-05	3.81694e-05	0	0	0	0	0	0	0	0	0	0	k__Bacteria;p__Verrucomicrobiota;c__Verrucomicrobiae;o__Opitutales;f__Opitutaceae;g__Opitutus;
Krasilnikovia	0	0	0	0	0	0	0	0	0	0	0	0	0	0	0	0	0	0	0	0	k__Bacteria;p__Actinobacteriota;c__Actinobacteria;o__Micromonosporales;f__Micromonosporaceae;g__Krasilnikovia;
Pygmaiobacter	0	0	0	0	0	0	0	0	0	0	0	0	0	0	0	0	0	0	0	0	k__Bacteria;p__Firmicutes;c__Clostridia;o__Oscillospirales;f__Ruminococcaceae;g__Pygmaiobacter;
Vitreoscilla	0	0	0	0	0	0	0	0	0	0	0	0	0	0	0	0	0	0	0	0	k__Bacteria;p__Proteobacteria;c__Gammaproteobacteria;o__Burkholderiales;f__Neisseriaceae;g__Vitreoscilla;
Chelatococcus	0	0	0	0	0	0	0	0	0	0	0	0	0	0	0	0	0	0	0	0	k__Bacteria;p__Proteobacteria;c__Alphaproteobacteria;o__Rhizobiales;f__Beijerinckiaceae;g__Chelatococcus;
JCM_18997	0	0	0	0	0	0	0	0	0	0	0	0	0	0	0	0	0	0	0	0	k__Bacteria;p__Actinobacteriota;c__Thermoleophilia;o__Solirubrobacterales;f__Solirubrobacteraceae;g__JCM_18997;
Clostridium_sensu_stricto_13	0	0	0	0	0	0	0	0	0	0	0	0	7.63388e-05	0	0	0	0	0	0	0	k__Bacteria;p__Firmicutes;c__Clostridia;o__Clostridiales;f__Clostridiaceae;g__Clostridium_sensu_stricto_13;
Prevotellaceae_UCG-004	0	0	0	3.81694e-05	0	0	0	0	0	0	0	7.63388e-05	0	0	0	0	0	0.000114508	0	0	k__Bacteria;p__Bacteroidota;c__Bacteroidia;o__Bacteroidales;f__Prevotellaceae;g__Prevotellaceae_UCG-004;
Nitrococcus	0	0	0	0	0	0	0	0	0	0	0	0	0	0	0	0	0	0	0	0	k__Bacteria;p__Proteobacteria;c__Gammaproteobacteria;o__Nitrococcales;f__Nitrococcaceae;g__Nitrococcus;
Tahibacter	0	0	0	0	0	0	0	0	0	0	0	0	0	0	0	0	0	0	0	0	k__Bacteria;p__Proteobacteria;c__Gammaproteobacteria;o__Xanthomonadales;f__Rhodanobacteraceae;g__Tahibacter;
Yaniella	0	0	0	0	0	0	0	0	0	0	0	0	0	0	0	0	0	0	0	0	k__Bacteria;p__Actinobacteriota;c__Actinobacteria;o__Micrococcales;f__Micrococcaceae;g__Yaniella;
Tolypothrix	0	0	0	0	0	0	0	0	0	0	0	0	0	0	0	0	0	0	0	0	k__Bacteria;p__Cyanobacteria;c__Cyanobacteriia;o__Cyanobacteriales;f__Nostocaceae;g__Tolypothrix;
Sporacetigenium	0	0	0	0	0	0	0	0	0	0	0	0	3.81694e-05	0	0	0	0	0	0	0	k__Bacteria;p__Firmicutes;c__Clostridia;o__Peptostreptococcales-Tissierellales;f__Peptostreptococcaceae;g__Sporacetigenium;
F0332	0	0	0	0	0	0	0	0	0	0	0	0	0	0	0	0	0	0	0	0	k__Bacteria;p__Actinobacteriota;c__Actinobacteria;o__Actinomycetales;f__Actinomycetaceae;g__F0332;
Desulfopila	0	0	0	0	0	0	0	0	0	0	0	0	0.000114508	0	0	0	0	0	0	0	k__Bacteria;p__Desulfobacterota;c__Desulfobulbia;o__Desulfobulbales;f__Desulfocapsaceae;g__Desulfopila;
Siphonobacter	0	0	0	0	0	0	0	0	0	0	0	0	0	0	0	0	0	0	0	0	k__Bacteria;p__Bacteroidota;c__Bacteroidia;o__Cytophagales;f__Cytophagaceae;g__Siphonobacter;
Clostridium_sensu_stricto_12	0	0	0	0	0	3.81694e-05	0	0	0	0	0	0	0	0	0	0	0	0	0	3.81694e-05	k__Bacteria;p__Firmicutes;c__Clostridia;o__Clostridiales;f__Clostridiaceae;g__Clostridium_sensu_stricto_12;
AKYG587	0	0	0	0	0	0	0	0	0	0	0	0	0	0	0	0	0	0	0	0	k__Bacteria;p__Planctomycetota;c__Phycisphaerae;o__Phycisphaerales;f__Phycisphaeraceae;g__AKYG587;
unidentified_SAR324_clade(Marine_group_B)	0	0	0	0	0	0	0	0	0	0	0	0	0.000114508	0	0	0	0	0	0	0	k__Bacteria;p__SAR324_clade(Marine_group_B);c__unidentified_SAR324_clade(Marine_group_B);o__unidentified_SAR324_clade(Marine_group_B);f__unidentified_SAR324_clade(Marine_group_B);g__unidentified_SAR324_clade(Marine_group_B);
Sandaracinus	0	0	0	0	0	0	0	0	3.81694e-05	0	0	0	0.000114508	0	0	0	0	0	0	0	k__Bacteria;p__Myxococcota;c__Polyangia;o__Polyangiales;f__Sandaracinaceae;g__Sandaracinus;
Candidatus_Competibacter	0	0	0	0	7.63388e-05	3.81694e-05	0	0	0	0	0	0	7.63388e-05	0	0	0	0	0	0	0	k__Bacteria;p__Proteobacteria;c__Gammaproteobacteria;o__Competibacterales;f__Competibacteraceae;g__Candidatus_Competibacter;
Coxiella	0	0	0	0	0	0	0	0	3.81694e-05	0	0	0	3.81694e-05	0	0	0	0	0	0	7.63388e-05	k__Bacteria;p__Proteobacteria;c__Gammaproteobacteria;o__Coxiellales;f__Coxiellaceae;g__Coxiella;
BSV13	0	0	0	0	0	0	0	0	0	0	0	0	0	0	0	0	0	0	0	0	k__Bacteria;p__Bacteroidota;c__Bacteroidia;o__Bacteroidales;f__Prolixibacteraceae;g__BSV13;
unidentified_BSV26	0	0	0	0	0	3.81694e-05	0	0	0	0	0	0	0.000114508	0	0	0	0	0	0	0	k__Bacteria;p__Kryptonia;c__unidentified_Kryptonia;o__Kryptoniales;f__BSV26;g__unidentified_BSV26;
Tissierella	0	0	0	0	0	0	0	0	0	0	0	0	0	0	0	0	0	0	0	0	k__Bacteria;p__Firmicutes;c__Clostridia;o__Peptostreptococcales-Tissierellales;f__unidentified_Peptostreptococcales-Tissierellales;g__Tissierella;
Frisingicoccus	0	0	0	0	0	0	0	0	0	0	0	0	0	0	0	0	0	0	0	0	k__Bacteria;p__Firmicutes;c__Clostridia;o__Lachnospirales;f__Lachnospiraceae;g__Frisingicoccus;
Bulleidia	0	0	0	0	0	0	0	0	0	0	0	0	0	0	0	0	0	0	0	0	k__Bacteria;p__Firmicutes;c__Bacilli;o__Erysipelotrichales;f__Erysipelotrichaceae;g__Bulleidia;
Rhodocytophaga	0	0	0	0	0	0	0	0	0	0	0	0	0	0	0	0	0	0	0	3.81694e-05	k__Bacteria;p__Bacteroidota;c__Bacteroidia;o__Cytophagales;f__Cytophagaceae;g__Rhodocytophaga;
Flaviaesturariibacter	0	0	0	0	0	0	0	0	0	0	0	0	0	0	0	0	0	0	0	0	k__Bacteria;p__Bacteroidota;c__Bacteroidia;o__Chitinophagales;f__Chitinophagaceae;g__Flaviaesturariibacter;
Oxalobacter	0	0	0	0	3.81694e-05	0	0	0	0	0	0	0	0	0	0	0	0	0	0	0	k__Bacteria;p__Proteobacteria;c__Gammaproteobacteria;o__Burkholderiales;f__Oxalobacteraceae;g__Oxalobacter;
Oikopleura	0	0	0	0	0	0	0	0	0	0	0	0	0	0	0	0	0	0	0	0	k__Bacteria;p__Verrucomicrobiota;c__Verrucomicrobiae;o__Pedosphaerales;f__Pedosphaeraceae;g__Oikopleura;
Idiomarina	0	0	0	0	0	0	0	0	0	0	0	0	0	0	0	0	0	0	0	0	k__Bacteria;p__Proteobacteria;c__Gammaproteobacteria;o__Alteromonadales;f__Idiomarinaceae;g__Idiomarina;
Fusibacter	0	0	0	0	0	0	0	0	0	0	0	0	0	0	0	0	0	0	0	0	k__Bacteria;p__Firmicutes;c__Clostridia;o__Peptostreptococcales-Tissierellales;f__Fusibacteraceae;g__Fusibacter;
Kaistia	0	0	0	0	0	0	0	0	0	0	0	0	0	0	0	0	0	0	0	0	k__Bacteria;p__Proteobacteria;c__Alphaproteobacteria;o__Rhizobiales;f__Kaistiaceae;g__Kaistia;
Empedobacter	0	0	0	0	0	0	0	0	0	0	0	0	0	0	0	0	0	0	0	0	k__Bacteria;p__Bacteroidota;c__Bacteroidia;o__Flavobacteriales;f__Weeksellaceae;g__Empedobacter;
Granulicella	0	0	0	0	0	0	0	0	0	0	0	0	0	0	0	0	0	0	0	0	k__Bacteria;p__Acidobacteriota;c__Acidobacteriae;o__Acidobacteriales;f__Acidobacteriaceae_(Subgroup_1);g__Granulicella;
Candidimonas	0	0	0	0	0	0	0	0	0	0	0	0	0	0	0	0	0	0	0	0	k__Bacteria;p__Proteobacteria;c__Gammaproteobacteria;o__Burkholderiales;f__Alcaligenaceae;g__Candidimonas;
Camelimonas	0	0	0	0	0	0	0	0	0	0	0	0	0	0	0	0	0	0	0	0	k__Bacteria;p__Proteobacteria;c__Alphaproteobacteria;o__Rhizobiales;f__Beijerinckiaceae;g__Camelimonas;
Microbacterium	0	0	0	0	0	0	0	0	0	0	0	0	0	0	0	0	0	0	0	0	k__Bacteria;p__Actinobacteriota;c__Actinobacteria;o__Micrococcales;f__Microbacteriaceae;g__Microbacterium;
Imperialibacter	0	0	0	0	0	0	0	0	0	0	0	0	0	0	0	0	0	0	0	7.63388e-05	k__Bacteria;p__Bacteroidota;c__Bacteroidia;o__Cytophagales;f__Cyclobacteriaceae;g__Imperialibacter;
Candidatus_Iainarchaeum	0	0	0	0	0	0	0	0	0	0	0	0	0	0	0	0	0	0	0	7.63388e-05	k__Archaea;p__Iainarchaeota;c__Iainarchaeia;o__Iainarchaeales;f__unidentified_Iainarchaeales;g__Candidatus_Iainarchaeum;
Chelativorans	0	0	0	0	0	0	0	0	0	0	0	0	0	0	0	0	0	0	0	3.81694e-05	k__Bacteria;p__Proteobacteria;c__Alphaproteobacteria;o__Rhizobiales;f__Rhizobiaceae;g__Chelativorans;
unidentified_MWH-CFBk5	0	0	0	0	0	0	0	0	7.63388e-05	0	3.81694e-05	0	0	0	0	0	0	0	0	0	k__Bacteria;p__Bacteroidota;c__Bacteroidia;o__Cytophagales;f__MWH-CFBk5;g__unidentified_MWH-CFBk5;
Acetoanaerobium	0	0	0	0	0	0	0	0	0	0	0	0	0	0	0	0	0	0	0	0	k__Bacteria;p__Firmicutes;c__Clostridia;o__Peptostreptococcales-Tissierellales;f__Peptostreptococcaceae;g__Acetoanaerobium;
Faucicola	0	0	0	0	0	0	0	0	0	0	0	0	0	0	0	0	0	0	0	0	k__Bacteria;p__Proteobacteria;c__Gammaproteobacteria;o__Pseudomonadales;f__Moraxellaceae;g__Faucicola;
Thermoactinomyces	0	0	0	0	0	0	0	0	0	0	0	0	0	0	0	0	0	0	7.63388e-05	0	k__Bacteria;p__Firmicutes;c__Bacilli;o__Thermoactinomycetales;f__Thermoactinomycetaceae;g__Thermoactinomyces;
Tagaea	0	0	0	0	0	0	0	0	0	0	0	0	3.81694e-05	0	0	0	0	0	0	7.63388e-05	k__Bacteria;p__Proteobacteria;c__Alphaproteobacteria;o__Kiloniellales;f__Kiloniellaceae;g__Tagaea;
unidentified_Christensenellaceae	0	0	0	7.63388e-05	0	0	0	0	0	0	0	0	0	0	0	0	0	0	0	0	k__Bacteria;p__Firmicutes;c__Clostridia;o__Christensenellales;f__Christensenellaceae;g__unidentified_Christensenellaceae;
Azospira	0	0	0	0	0	0	0	0	0	0	0	0	0	0	0	0	0	0	0	0	k__Bacteria;p__Proteobacteria;c__Gammaproteobacteria;o__Burkholderiales;f__Rhodocyclaceae;g__Azospira;
Enorma	0	0	0	3.81694e-05	3.81694e-05	0	0	0	0	0	0	0	0	0	0	0	0	0	0	7.63388e-05	k__Bacteria;p__Actinobacteriota;c__Coriobacteriia;o__Coriobacteriales;f__Coriobacteriaceae;g__Enorma;
Spirochaeta_2	0	0	0	0	0	0	0	0	0	0	0	0	0	0	0	0	0	0	0	0	k__Bacteria;p__Spirochaetota;c__Spirochaetia;o__Spirochaetales;f__Spirochaetaceae;g__Spirochaeta_2;
unidentified_Gracilibacteria	0	0	0	0	0	0	0	0	0	0	0	0	0	0	0	0	0	0	0	0	k__Bacteria;p__Gracilibacteria;c__unidentified_Gracilibacteria;o__unidentified_Gracilibacteria;f__unidentified_Gracilibacteria;g__unidentified_Gracilibacteria;
DEV008	0	0	0	0	0	0	0	0	0	0	0	0	0	0	0	0	0	0	0	0	k__Bacteria;p__Verrucomicrobiota;c__Verrucomicrobiae;o__Pedosphaerales;f__Pedosphaeraceae;g__DEV008;
Acidovorax	0	0	0	0	3.81694e-05	0	0	0	0	0	0	0	0	0	0	0	0	0	0	0	k__Bacteria;p__Proteobacteria;c__Gammaproteobacteria;o__Burkholderiales;f__Comamonadaceae;g__Acidovorax;
Ammoniphilus	0	0	0	0	0	0	0	0	0	0	0	0	0	0	0	0	0	0	0	0	k__Bacteria;p__Firmicutes;c__Bacilli;o__Paenibacillales;f__Paenibacillaceae;g__Ammoniphilus;
Clostridium_sensu_stricto_6	0	0	0	0	0	0	0	0	0	0	0	0	0	0	0	0	0	0	0	0	k__Bacteria;p__Firmicutes;c__Clostridia;o__Clostridiales;f__Clostridiaceae;g__Clostridium_sensu_stricto_6;
Terrabacter	0	0	0	0	0	0	0	0	0	0	0	0	0	0	0	0	0	0	0	0	k__Bacteria;p__Actinobacteriota;c__Actinobacteria;o__Micrococcales;f__Intrasporangiaceae;g__Terrabacter;
Candidatus_Berkiella	0	0	0	0	0	0	0	0	0	0	0	0	0	0	0	0	0	0	0	0	k__Bacteria;p__Proteobacteria;c__Gammaproteobacteria;o__unidentified_Gammaproteobacteria;f__unidentified_Gammaproteobacteria;g__Candidatus_Berkiella;
Hydrogenispora	0	0	0	0	0	3.81694e-05	0	0	0	0	0	0	0	0	0	0	0	0	0	0	k__Bacteria;p__Firmicutes;c__Limnochordia;o__unidentified_Limnochordia;f__unidentified_Limnochordia;g__Hydrogenispora;
Jonesia	0	0	0	0	0	0	0	0	0	0	0	0	0	0	0	0	0	0	0	0	k__Bacteria;p__Actinobacteriota;c__Actinobacteria;o__Micrococcales;f__Jonesiaceae;g__Jonesia;
Howardella	0	0	0	0	0	0	0	0	0	0	0	0	0	0	0	0	0	0	0	0	k__Bacteria;p__Firmicutes;c__Clostridia;o__Lachnospirales;f__Lachnospiraceae;g__Howardella;
Methanosphaera	0	0	0	0	0	0	0	0	0	0	0	0	0	0	0	0	0	0	0	0	k__Archaea;p__Euryarchaeota;c__Methanobacteria;o__Methanobacteriales;f__Methanobacteriaceae;g__Methanosphaera;
Candidatus_Omnitrophus	0	0	0	0	0	0	0	0	0	0	0	0	0	0	0	0	0	0	0	0	k__Bacteria;p__Verrucomicrobiota;c__Omnitrophia;o__Omnitrophales;f__Omnitrophaceae;g__Candidatus_Omnitrophus;
Marinilactibacillus	0	0	0	0	0	0	0	0	0	0	0	0	0	0	0	7.63388e-05	0	0	0	0	k__Bacteria;p__Firmicutes;c__Bacilli;o__Lactobacillales;f__Carnobacteriaceae;g__Marinilactibacillus;
Longivirga	0	0	0	0	0	0	0	0	0	0	0	0	0	0	0	0	0	0	0	0	k__Bacteria;p__Actinobacteriota;c__Actinobacteria;o__Frankiales;f__Sporichthyaceae;g__Longivirga;
Fretibacterium	0	0	0	0	0	0	0	0	0	0	0	0	0	0	0	0	0	0	0	0	k__Bacteria;p__Synergistota;c__Synergistia;o__Synergistales;f__Synergistaceae;g__Fretibacterium;
Blvii28_wastewater-sludge_group	0	0	0	0	0	0	0	0	0	0	0	0	3.81694e-05	0	0	0	0	0	0	0	k__Bacteria;p__Bacteroidota;c__Bacteroidia;o__Bacteroidales;f__Williamwhitmaniaceae;g__Blvii28_wastewater-sludge_group;
CENA533	0	0	0	0	0	0	0	0	0	0	0	0	0	0	0	0	0	0	0	0	k__Bacteria;p__Cyanobacteria;c__Cyanobacteriia;o__Cyanobacteriales;f__Desertifilaceae;g__CENA533;
Azospirillum	0	0	0	0	0	0	0	0	0	0	0	3.81694e-05	0	0	0	0	0	0	0	0	k__Bacteria;p__Proteobacteria;c__Alphaproteobacteria;o__Azospirillales;f__Azospirillaceae;g__Azospirillum;
Acetivibrio	0	0	0	0	0	0	0	0	0	0	0	0	0	0	0	0	0	0	0	0	k__Bacteria;p__Firmicutes;c__Clostridia;o__unidentified_Clostridia;f__Hungateiclostridiaceae;g__Acetivibrio;
Pelospora	0	0	0	0	0	0	0	0	0	0	0	0	0	0	0	0	0	0	0	0	k__Bacteria;p__Firmicutes;c__Syntrophomonadia;o__Syntrophomonadales;f__Syntrophomonadaceae;g__Pelospora;
Amphibacillus	0	0	0	0	0	0	0	0	0	0	0	0	0	0	0	0	0	0	0	0	k__Bacteria;p__Firmicutes;c__Bacilli;o__Bacillales;f__Bacillaceae;g__Amphibacillus;
unidentified_BIrii41	0	0	0	0	0	0	0	0	0	0	0	0	0	0	0	0	0	0	0	7.63388e-05	k__Bacteria;p__Myxococcota;c__Polyangia;o__Polyangiales;f__BIrii41;g__unidentified_BIrii41;
unidentified_0319-6G20	0	0	0	0	0	0	0	0	0	0	0	0	0	0	0	0	0	0	0	0	k__Bacteria;p__Bdellovibrionota;c__Oligoflexia;o__0319-6G20;f__unidentified_0319-6G20;g__unidentified_0319-6G20;
BIyi10	0	0	0	0	0	0	0	0	0	0	0	0	0	0	0	0	0	0	0	0	k__Bacteria;p__Proteobacteria;c__Gammaproteobacteria;o__Oceanospirillales;f__Pseudohongiellaceae;g__BIyi10;
Verrucomicrobium	0	0	0	0	0	0	0	0	0	0	0	0	0	0	0	0	0	0	0	0	k__Bacteria;p__Verrucomicrobiota;c__Verrucomicrobiae;o__Verrucomicrobiales;f__Verrucomicrobiaceae;g__Verrucomicrobium;
C1-B045	0	0	0	0	0	0	0	0	0	0	0	0	7.63388e-05	0	0	0	0	0	0	0	k__Bacteria;p__Proteobacteria;c__Gammaproteobacteria;o__Cellvibrionales;f__Porticoccaceae;g__C1-B045;
Microcoleus_PCC-7113	0	0	0	0	0	0	0	0	0	0	0	0	0	0	0	0	0	0	0	0	k__Bacteria;p__Cyanobacteria;c__Cyanobacteriia;o__Cyanobacteriales;f__Coleofasciculaceae;g__Microcoleus_PCC-7113;
Neochlamydia	0	0	0	0	0	0	0	0	0	0	0	0	0	0	0	0	0	0	0	0	k__Bacteria;p__Chlamydiae;c__unidentified_Chlamydiae;o__Chlamydiales;f__Parachlamydiaceae;g__Neochlamydia;
Thermodesulfovibrio	0	0	0	0	0	0	0	0	0	0	0	0	0	0	0	0	0	0	0	0	k__Bacteria;p__Nitrospirota;c__Thermodesulfovibrionia;o__Thermodesulfovibrionales;f__Thermodesulfovibrionaceae;g__Thermodesulfovibrio;
Zoogloea	0	0	0	0	0	0	0	0	0	0	0	0	0	0	0	0	0	0	0	0	k__Bacteria;p__Proteobacteria;c__Gammaproteobacteria;o__Burkholderiales;f__Rhodocyclaceae;g__Zoogloea;
Lachnospiraceae_NK3A20_group	0	0	0	0	0	0	0	0	0	0	0	0	0	0	0	0	0	0	0	0	k__Bacteria;p__Firmicutes;c__Clostridia;o__Lachnospirales;f__Lachnospiraceae;g__Lachnospiraceae_NK3A20_group;
unidentified_Saprospiraceae	0	0	0	0	0	0	0	3.81694e-05	0	3.81694e-05	3.81694e-05	0	0	0	0	0	0	0	0	0	k__Bacteria;p__unidentified_Bacteria;c__Bacteroidia;o__Chitinophagales;f__Saprospiraceae;g__unidentified_Saprospiraceae;
Clostridium_sensu_stricto_8	0	0	0	0	0	0	0	0	0	0	0	0	0	0	0	0	0	0	0	0	k__Bacteria;p__Firmicutes;c__Clostridia;o__Clostridiales;f__Clostridiaceae;g__Clostridium_sensu_stricto_8;
Bosea	0	0	0	0	0	0	0	0	0	0	0	3.81694e-05	0	0	0	0	0	0	0	0	k__Bacteria;p__Proteobacteria;c__Alphaproteobacteria;o__Rhizobiales;f__Beijerinckiaceae;g__Bosea;
Elstera	0	0	0	0	0	0	7.63388e-05	0	0	0	0	0	0	0	3.81694e-05	0	0	0	3.81694e-05	0	k__Bacteria;p__Proteobacteria;c__Alphaproteobacteria;o__Elsterales;f__Elsteraceae;g__Elstera;
Candidatus_Nucleicultrix	0	0	0	0	0	0	0	0	0	0	0	0	0	0	0	0	0	0	0	0	k__Bacteria;p__Proteobacteria;c__Alphaproteobacteria;o__Caedibacterales;f__Caedibacteraceae;g__Candidatus_Nucleicultrix;
Fenollaria	0	0	0	0	0	0	0	0	0	0	0	0	0	0	0	0	0	0	0	0	k__Bacteria;p__Firmicutes;c__Clostridia;o__Peptostreptococcales-Tissierellales;f__unidentified_Peptostreptococcales-Tissierellales;g__Fenollaria;
Polynucleobacter	3.81694e-05	0	0	0	0	0	0	0	0	0	0	0	0	0	7.63388e-05	0	0	0	3.81694e-05	0	k__Bacteria;p__Proteobacteria;c__Gammaproteobacteria;o__Burkholderiales;f__Burkholderiaceae;g__Polynucleobacter;
Oscillospira	0	0	0	0	0	0	0	0	0	0	0	0	0	0	0	0	0	0	0	0	k__Bacteria;p__Firmicutes;c__Clostridia;o__Oscillospirales;f__Oscillospiraceae;g__Oscillospira;
Litorilinea	0	0	0	0	0	0	0	0	0	0	0	0	0	0	0	0	0	0	0	0	k__Bacteria;p__Chloroflexi;c__Anaerolineae;o__Caldilineales;f__Caldilineaceae;g__Litorilinea;
Wohlfahrtiimonas	0	0	0	0	0	0	0	0	0	0	0	0	0	0	0	0	0	0	0	0	k__Bacteria;p__Proteobacteria;c__Gammaproteobacteria;o__Cardiobacteriales;f__Wohlfahrtiimonadaceae;g__Wohlfahrtiimonas;
Thermincola	0	0	0	0	0	0	0	0	0	0	0	0	0	0	0	0	0	0	0	0	k__Bacteria;p__Firmicutes;c__Clostridia;o__Thermincolales;f__Thermincolaceae;g__Thermincola;
Leucobacter	0	0	0	0	0	0	0	0	0	0	0	0	0	0	0	0	0	0	0	0	k__Bacteria;p__Actinobacteriota;c__Actinobacteria;o__Micrococcales;f__Microbacteriaceae;g__Leucobacter;
Actinophytocola	0	0	0	0	0	0	0	0	0	0	0	0	0	0	0	0	0	0	0	0	k__Bacteria;p__Actinobacteriota;c__Actinobacteria;o__Pseudonocardiales;f__Pseudonocardiaceae;g__Actinophytocola;
Segetibacter	0	0	0	0	0	0	0	0	0	0	0	0	0	0	0	0	0	0	0	0	k__Bacteria;p__Bacteroidota;c__Bacteroidia;o__Chitinophagales;f__Chitinophagaceae;g__Segetibacter;
unidentified_WD2101_soil_group	0	0	0	0	0	0	0	0	0	0	0	0	0	0	0	0	0	0	0	0	k__Bacteria;p__Planctomycetota;c__Phycisphaerae;o__Tepidisphaerales;f__WD2101_soil_group;g__unidentified_WD2101_soil_group;
Alcanivorax	0	0	0	0	0	0	0	0	0	0	0	0	0	0	0	0	0	0	0	0	k__Bacteria;p__Proteobacteria;c__Gammaproteobacteria;o__Oceanospirillales;f__Alcanivoracaceae1;g__Alcanivorax;
Sphaerochaeta	0	0	0	0	0	0	0	0	0	0	0	0	0	0	0	0	0	0	0	0	k__Bacteria;p__Spirochaetota;c__Spirochaetia;o__Spirochaetales;f__Spirochaetaceae;g__Sphaerochaeta;
[Desulfobacterium]_catecholicum_group	0	0	0	0	0	0	0	0	0	0	0	0	3.81694e-05	0	0	0	0	0	0	0	k__Bacteria;p__Desulfobacterota;c__Desulfobulbia;o__Desulfobulbales;f__Desulfocapsaceae;g__[Desulfobacterium]_catecholicum_group;
Cryptobacterium	0	0	0	0	0	0	0	0	3.81694e-05	0	0	0	0	0	0	0	0	0	0	0	k__Bacteria;p__Actinobacteriota;c__Coriobacteriia;o__Coriobacteriales;f__Eggerthellaceae;g__Cryptobacterium;
unidentified_SM23-32	0	0	0	0	0	0	0	0	0	0	0	0	0	0	0	0	0	0	0	0	k__Bacteria;p__Planctomycetota;c__Brocadiae;o__SM23-32;f__unidentified_SM23-32;g__unidentified_SM23-32;
Promicromonospora	0	0	0	0	0	0	0	3.81694e-05	0	0	3.81694e-05	0	0	0	0	0	0	0	0	0	k__Bacteria;p__Actinobacteriota;c__Actinobacteria;o__Micrococcales;f__Promicromonosporaceae;g__Promicromonospora;
Sorangium	0	0	0	0	0	0	0	0	0	0	0	3.81694e-05	0	0	0	0	0	0	0	0	k__Bacteria;p__Myxococcota;c__Polyangia;o__Polyangiales;f__Polyangiaceae;g__Sorangium;
Nocardia	0	0	0	0	0	0	0	0	0	0	0	0	0	0	0	0	0	0	0	0	k__Bacteria;p__Actinobacteriota;c__Actinobacteria;o__Corynebacteriales;f__Nocardiaceae;g__Nocardia;
Exiguobacterium	0	0	0	0	0	0	0	0	0	0	0	0	0	0	0	0	0	0	0	0	k__Bacteria;p__Firmicutes;c__Bacilli;o__Exiguobacterales;f__Exiguobacteraceae;g__Exiguobacterium;
Shimazuella	0	0	0	0	0	0	0	0	0	0	0	0	0	0	0	0	0	0	0	3.81694e-05	k__Bacteria;p__Firmicutes;c__Bacilli;o__Thermoactinomycetales;f__Thermoactinomycetaceae;g__Shimazuella;
Bellilinea	0	0	0	0	0	7.63388e-05	0	0	0	0	0	0	0	0	0	0	0	0	0	0	k__Bacteria;p__Chloroflexi;c__Anaerolineae;o__Anaerolineales;f__Anaerolineaceae;g__Bellilinea;
Cryptosporangium	0	0	0	0	0	0	0	0	0	0	0	0	0	0	0	0	0	0	0	0	k__Bacteria;p__Actinobacteriota;c__Actinobacteria;o__Frankiales;f__Cryptosporangiaceae;g__Cryptosporangium;
unidentified_IMCC26256	0	0	0	0	0	0	0	0	0	0	0	0	0	0	0	0	0	0	0	0	k__Bacteria;p__Actinobacteriota;c__Acidimicrobiia;o__IMCC26256;f__unidentified_IMCC26256;g__unidentified_IMCC26256;
unidentified_Lineage_IV	0	0	0	0	0	0	0	0	0	0	0	0	0	0	0	0	0	0	0	7.63388e-05	k__Bacteria;p__Elusimicrobia;c__unidentified_Elusimicrobia;o__Lineage_IV;f__unidentified_Lineage_IV;g__unidentified_Lineage_IV;
Z114MB74	0	0	0	0	0	7.63388e-05	0	0	0	0	0	0	0	0	0	0	0	0	0	0	k__Bacteria;p__Methylomirabilota;c__Methylomirabilia;o__Methylomirabilales;f__Methylomirabilaceae;g__Z114MB74;
BBMC-4	0	0	0	0	0	0	0	0	0	0	0	0	0	0	0	0	0	0	0	0	k__Bacteria;p__Fibrobacterota;c__Fibrobacteria;o__Fibrobacterales;f__unidentified_Fibrobacterales;g__BBMC-4;
Cephalothrix_SAG_75.79	0	0	0	0	0	0	0	0	0	0	0	7.63388e-05	0	0	0	0	0	0	0	0	k__Bacteria;p__Cyanobacteria;c__Cyanobacteriia;o__Cyanobacteriales;f__Phormidiaceae;g__Cephalothrix_SAG_75.79;
Leptolinea	0	0	0	0	0	0	0	0	0	0	0	0	0	0	0	0	0	0	0	0	k__Bacteria;p__Chloroflexi;c__Anaerolineae;o__Anaerolineales;f__Anaerolineaceae;g__Leptolinea;
Ruminiclostridium	0	0	0	0	0	0	0	0	0	0	0	0	0	0	0	0	0	0	0	0	k__Bacteria;p__Firmicutes;c__Clostridia;o__unidentified_Clostridia;f__Hungateiclostridiaceae;g__Ruminiclostridium;
Myroides	0	0	0	0	0	0	0	0	0	0	0	0	0	0	0	0	0	0	0	0	k__Bacteria;p__Bacteroidota;c__Bacteroidia;o__Flavobacteriales;f__Flavobacteriaceae;g__Myroides;
Sulfurimonas	0	0	0	0	0	0	0	0	0	0	0	0	0	0	0	0	0	0	0	0	k__Bacteria;p__Campilobacterota;c__Campylobacteria;o__Campylobacterales;f__Sulfurimonadaceae;g__Sulfurimonas;
Fonticella	0	0	0	0	0	3.81694e-05	0	0	0	0	0	0	0	0	0	0	0	0	0	0	k__Bacteria;p__Firmicutes;c__Clostridia;o__Clostridiales;f__Caloramatoraceae;g__Fonticella;
Sanguibacteroides	0	0	0	0	0	0	0	0	0	0	0	0	0	0	0	0	0	0	0	0	k__Bacteria;p__Bacteroidota;c__Bacteroidia;o__Bacteroidales;f__Marinifilaceae;g__Sanguibacteroides;
Afipia	0	0	0	0	0	0	0	0	0	0	0	0	0	0	0	0	0	0	0	0	k__Bacteria;p__Proteobacteria;c__Alphaproteobacteria;o__Rhizobiales;f__Xanthobacteraceae;g__Afipia;
Streptobacillus	0	0	0	0	0	0	0	0	0	0	0	0	0	0	0	0	0	0	0	0	k__Bacteria;p__Fusobacteriota;c__Fusobacteriia;o__Fusobacteriales;f__Leptotrichiaceae;g__Streptobacillus;
Prosthecomicrobium	0	0	0	0	0	0	0	0	0	0	0	0	0	0	0	0	0	0	0	0	k__Bacteria;p__Proteobacteria;c__Alphaproteobacteria;o__Rhizobiales;f__Pleomorphomonadaceae;g__Prosthecomicrobium;
Mucilaginibacter	0	0	0	0	0	0	0	0	0	0	0	0	0	0	0	0	0	0	0	0	k__Bacteria;p__Bacteroidota;c__Bacteroidia;o__Sphingobacteriales;f__Sphingobacteriaceae;g__Mucilaginibacter;
unidentified_Berkelbacteria	0	0	0	0	0	0	0	0	0	0	0	0	0	0	0	0	0	0	0	0	k__Bacteria;p__Berkelbacteria;c__unidentified_Berkelbacteria;o__unidentified_Berkelbacteria;f__unidentified_Berkelbacteria;g__unidentified_Berkelbacteria;
Propioniciclava	0	0	0	0	0	0	0	0	0	0	0	0	0	0	0	0	0	0	0	0	k__Bacteria;p__Actinobacteriota;c__Actinobacteria;o__Propionibacteriales;f__Propionibacteriaceae;g__Propioniciclava;
Tepidiphilus	0	0	0	0	0	0	0	0	0	0	0	0	0	0	0	0	0	0	0	0	k__Bacteria;p__Proteobacteria;c__Gammaproteobacteria;o__Burkholderiales;f__Hydrogenophilaceae;g__Tepidiphilus;
TM7	0	0	0	0	0	0	0	0	0	0	0	0	0	0	0	0	0	0	0	0	k__Bacteria;p__unidentified_Bacteria;c__Saccharimonadia;o__Saccharimonadales;f__S32;g__TM7;
Cystobacter	0	0	0	0	0	0	0	0	0	3.81694e-05	0	0	0	0	0	0	0	0	0	0	k__Bacteria;p__Myxococcota;c__Myxococcia;o__Myxococcales;f__Myxococcaceae;g__Cystobacter;
Salinicoccus	0	0	0	0	0	0	0	0	0	0	0	0	0	0	0	0	0	0	0	0	k__Bacteria;p__Firmicutes;c__Bacilli;o__Staphylococcales;f__Staphylococcaceae;g__Salinicoccus;
Candidatus_Xiphinematobacter	0	0	0	0	0	0	0	0	0	3.81694e-05	0	0	0	0	0	0	0	0	0	7.63388e-05	k__Bacteria;p__Verrucomicrobiota;c__Verrucomicrobiae;o__Chthoniobacterales;f__Xiphinematobacteraceae;g__Candidatus_Xiphinematobacter;
Proteiniphilum	0	0	0	0	0	0	0	0	0	0	0	0	0	0	0	0	0	0	0	0	k__Bacteria;p__Bacteroidota;c__Bacteroidia;o__Bacteroidales;f__Dysgonomonadaceae;g__Proteiniphilum;
Thiothrix	0	0	0	0	3.81694e-05	0	0	0	0	0	0	0	0	0	0	0	0	0	0	0	k__Bacteria;p__Proteobacteria;c__Gammaproteobacteria;o__Thiotrichales;f__Thiotrichaceae;g__Thiothrix;
Propionibacterium	0	0	0	0	0	0	0	0	0	0	0	0	0	0	0	0	0	0	0	0	k__Bacteria;p__Actinobacteriota;c__Actinobacteria;o__Propionibacteriales;f__Propionibacteriaceae;g__Propionibacterium;
Thiohalophilus	0	0	0	0	0	0	0	0	0	0	0	0	0	0	0	0	0	0	0	0	k__Bacteria;p__Proteobacteria;c__Gammaproteobacteria;o__Ectothiorhodospirales;f__Thioalkalispiraceae;g__Thiohalophilus;
TC1	0	0	0	0	0	0	0	0	0	0	0	0	0	0	0	0	0	0	0	0	k__Bacteria;p__Firmicutes;c__Desulfitobacteriia;o__Desulfitobacteriales;f__unidentified_Desulfitobacteriales;g__TC1;
AqS1	0	0	0	0	0	0	0	0	0	0	0	0	0	0	0	0	0	0	0	0	k__Bacteria;p__Proteobacteria;c__Gammaproteobacteria;o__Nitrosococcales;f__Nitrosococcaceae;g__AqS1;
Ammoniibacillus	0	0	0	0	0	0	0	0	0	0	0	0	0	0	0	0	0	0	0	0	k__Bacteria;p__Firmicutes;c__Bacilli;o__Paenibacillales;f__Paenibacillaceae;g__Ammoniibacillus;
Carboxylicivirga	0	0	0	0	0	0	0	0	0	0	0	0	0	0	0	0	0	0	0	0	k__Bacteria;p__Bacteroidota;c__Bacteroidia;o__Bacteroidales;f__Marinilabiliaceae;g__Carboxylicivirga;
Rhizorhapis	0	0	0	0	0	0	0	0	0	0	0	0	0	0	0	0	0	0	0	0	k__Bacteria;p__Proteobacteria;c__Alphaproteobacteria;o__Sphingomonadales;f__Sphingomonadaceae;g__Rhizorhapis;
Paramaledivibacter	0	0	0	0	0	0	0	0	0	0	0	0	0	0	0	0	0	0	0	0	k__Bacteria;p__Firmicutes;c__Clostridia;o__Peptostreptococcales-Tissierellales;f__Caminicellaceae;g__Paramaledivibacter;
Acidipropionibacterium	0	0	0	0	0	0	0	0	0	0	0	0	0	0	0	0	0	0	0	0	k__Bacteria;p__Actinobacteriota;c__Actinobacteria;o__Propionibacteriales;f__Propionibacteriaceae;g__Acidipropionibacterium;
unidentified_UCG-010	0	0	0	0	0	0	0	0	0	0	0	0	0	0	0	0	0	0	0	0	k__Bacteria;p__Firmicutes;c__Clostridia;o__Oscillospirales;f__UCG-010;g__unidentified_UCG-010;
Polaromonas	0	0	0	0	0	0	0	0	7.63388e-05	0	0	0	0	0	0	0	0	0	0	0	k__Bacteria;p__Proteobacteria;c__Gammaproteobacteria;o__Burkholderiales;f__Comamonadaceae;g__Polaromonas;
Cavicella	0	0	0	0	0	0	0	0	0	0	0	0	3.81694e-05	0	0	0	0	0	0	0	k__Bacteria;p__Proteobacteria;c__Gammaproteobacteria;o__Pseudomonadales;f__Moraxellaceae;g__Cavicella;
Mobiluncus	0	0	0	0	0	0	0	0	0	0	0	0	0	0	0	0	0	0	0	0	k__Bacteria;p__Actinobacteriota;c__Actinobacteria;o__Actinomycetales;f__Actinomycetaceae;g__Mobiluncus;
Inquilinus	0	0	0	0	0	0	0	0	3.81694e-05	0	0	0	0	0	0	0	0	0	0	7.63388e-05	k__Bacteria;p__Proteobacteria;c__Alphaproteobacteria;o__Azospirillales;f__Inquilinaceae;g__Inquilinus;
Desulfomonile	0	0	0	0	0	3.81694e-05	0	0	0	0	0	0	0	0	0	0	0	0	0	0	k__Bacteria;p__Desulfobacterota;c__Desulfomonilia;o__Desulfomonilales;f__Desulfomonilaceae;g__Desulfomonile;
Phreatobacter	0	0	0	0	0	0	0	0	0	0	0	0	0	0	0	0	0	0	0	0	k__Bacteria;p__Proteobacteria;c__Alphaproteobacteria;o__Rhizobiales;f__unidentified_Rhizobiales;g__Phreatobacter;
Constrictibacter	0	0	0	0	0	0	0	0	0	0	0	7.63388e-05	0	0	0	0	0	0	0	0	k__Bacteria;p__Proteobacteria;c__Alphaproteobacteria;o__Puniceispirillales;f__unidentified_Puniceispirillales;g__Constrictibacter;
Flavonifractor	0	0	0	0	0	0	0	0	0	0	0	0	0	0	0	0	0	0	0	0	k__Bacteria;p__Firmicutes;c__Clostridia;o__Oscillospirales;f__Oscillospiraceae;g__Flavonifractor;
Hazenella	0	0	0	0	0	0	0	0	0	0	0	0	0	0	0	0	0	0	0	0	k__Bacteria;p__Firmicutes;c__Bacilli;o__Thermoactinomycetales;f__Thermoactinomycetaceae;g__Hazenella;
Draconibacterium	0	0	0	0	0	0	0	0	0	0	0	0	0	0	0	0	0	0	0	0	k__Bacteria;p__Bacteroidota;c__Bacteroidia;o__Bacteroidales;f__Prolixibacteraceae;g__Draconibacterium;
unidentified_Schekmanbacteria	0	0	0	0	0	0	0	0	0	0	0	0	0	0	0	0	0	0	0	0	k__Bacteria;p__Schekmanbacteria;c__unidentified_Schekmanbacteria;o__unidentified_Schekmanbacteria;f__unidentified_Schekmanbacteria;g__unidentified_Schekmanbacteria;
Pseudoramibacter	0	0	0	0	0	0	0	0	0	0	0	0	0	0	0	0	0	0	0	0	k__Bacteria;p__Firmicutes;c__Clostridia;o__Eubacteriales;f__Eubacteriaceae;g__Pseudoramibacter;
Methylocaldum	0	0	0	0	0	0	0	0	0	0	0	0	0	0	0	0	0	0	0	0	k__Bacteria;p__Proteobacteria;c__Gammaproteobacteria;o__Methylococcales;f__Methylococcaceae;g__Methylocaldum;
KD3-10	0	0	0	0	0	0	0	0	0	0	0	0	0	0	0	0	0	0	0	0	k__Bacteria;p__Myxococcota;c__Myxococcia;o__Myxococcales;f__Myxococcaceae;g__KD3-10;
Sva0996_marine_group	0	0	0	0	0	0	0	0	0	0	0	0	3.81694e-05	0	0	0	0	0	0	0	k__Bacteria;p__Actinobacteriota;c__Acidimicrobiia;o__Microtrichales;f__Microtrichaceae;g__Sva0996_marine_group;
Trichloromonas	0	0	0	0	0	0	0	0	0	0	0	0	3.81694e-05	0	0	0	0	0	0	0	k__Bacteria;p__Desulfobacterota;c__Desulfuromonadia;o__unidentified_Desulfuromonadia;f__Desulfuromonadaceae;g__Trichloromonas;
Prolixibacter	0	0	0	0	0	0	0	0	0	0	0	0	0	0	0	0	0	0	0	0	k__Bacteria;p__Bacteroidota;c__Bacteroidia;o__Bacteroidales;f__Prolixibacteraceae;g__Prolixibacter;
Anaerolineaceae_UCG-001	0	0	0	0	0	0	0	0	0	0	0	0	0	0	0	0	0	0	0	0	k__Bacteria;p__Chloroflexi;c__Anaerolineae;o__Anaerolineales;f__Anaerolineaceae;g__Anaerolineaceae_UCG-001;
Methanolinea	0	0	0	0	0	3.81694e-05	0	0	0	0	0	0	0	0	0	0	0	0	0	0	k__Archaea;p__Halobacterota;c__Methanomicrobia;o__Methanomicrobiales;f__Methanoregulaceae;g__Methanolinea;
Sharpea	0	0	0	0	0	0	0	0	0	0	0	0	0	0	0	0	0	0	0	0	k__Bacteria;p__Firmicutes;c__Bacilli;o__Erysipelotrichales;f__Erysipelatoclostridiaceae;g__Sharpea;
Pirellula	0	0	0	0	0	0	0	0	0	0	0	0	0	0	0	0	0	0	0	0	k__Bacteria;p__Planctomycetes;c__unidentified_Planctomycetes;o__Pirellulales;f__Pirellulaceae;g__Pirellula;
Holophaga	0	0	0	0	0	0	0	0	0	0	0	0	0	0	0	0	0	0	0	0	k__Bacteria;p__Acidobacteriota;c__Holophagae;o__Holophagales;f__Holophagaceae;g__Holophaga;
Planctomicrobium	0	0	0	0	0	0	0	0	0	0	0	0	3.81694e-05	0	0	0	0	0	0	0	k__Bacteria;p__Planctomycetes;c__unidentified_Planctomycetes;o__Planctomycetales;f__Rubinisphaeraceae;g__Planctomicrobium;
Parviterribacter	0	0	0	0	0	0	0	0	0	0	0	0	0	0	0	0	0	0	0	0	k__Bacteria;p__Actinobacteriota;c__Thermoleophilia;o__Solirubrobacterales;f__Solirubrobacteraceae;g__Parviterribacter;
Flavihumibacter	0	0	0	0	0	0	0	0	0	0	0	0	0	0	0	0	0	0	0	0	k__Bacteria;p__Bacteroidota;c__Bacteroidia;o__Chitinophagales;f__Chitinophagaceae;g__Flavihumibacter;
Labrys	0	0	0	0	0	0	0	0	0	0	0	0	0	0	0	0	0	0	0	0	k__Bacteria;p__Proteobacteria;c__Alphaproteobacteria;o__Rhizobiales;f__Labraceae;g__Labrys;
Dehalogenimonas	0	0	0	0	0	0	0	0	0	0	0	0	3.81694e-05	0	0	0	0	0	0	0	k__Bacteria;p__Chloroflexi;c__Dehalococcoidia;o__Dehalococcoidales;f__Dehalococcoidaceae;g__Dehalogenimonas;
Meiothermus	0	0	0	0	0	0	0	0	0	0	0	0	0	0	0	0	0	0	0	0	k__Bacteria;p__Deinococcota;c__Deinococci;o__Thermales;f__Thermaceae;g__Meiothermus;
Desulfofrigus	0	0	0	0	0	0	0	0	0	0	0	0	0	0	0	0	0	0	0	0	k__Bacteria;p__Desulfobacterota;c__Desulfobacteria;o__Desulfobacterales;f__Desulfolunaceae;g__Desulfofrigus;
Cytophaga	0	0	0	0	0	0	0	0	0	0	0	0	0	0	0	0	0	0	0	0	k__Bacteria;p__Bacteroidota;c__Bacteroidia;o__Cytophagales;f__Cytophagaceae;g__Cytophaga;
Fimbriimonas	0	0	0	0	0	0	0	0	0	0	0	0	0	0	0	0	0	0	0	0	k__Bacteria;p__Armatimonadota;c__Fimbriimonadia;o__Fimbriimonadales;f__Fimbriimonadaceae;g__Fimbriimonas;
Friedmanniella	0	0	0	0	0	0	0	3.81694e-05	0	3.81694e-05	0	0	0	0	0	0	0	0	0	0	k__Bacteria;p__Actinobacteriota;c__Actinobacteria;o__Propionibacteriales;f__Propionibacteriaceae;g__Friedmanniella;
unidentified_Gammaproteobacteria	0	0	0	0	0	0	0	0	0	0	0	0	0	0	0	0	0	0	0	0	k__Bacteria;p__unidentified_Bacteria;c__Gammaproteobacteria;o__unidentified_Gammaproteobacteria;f__unidentified_Gammaproteobacteria;g__unidentified_Gammaproteobacteria;
Chungangia	0	0	0	0	0	0	0	0	0	0	0	0	0	0	0	0	0	0	0	0	k__Bacteria;p__Firmicutes;c__Bacilli;o__Bacillales;f__Planococcaceae;g__Chungangia;
unidentified_Candidatus_Ryanbacteria	0	0	0	0	0	0	0	0	0	0	0	0	0	0	0	0	0	0	0	0	k__Bacteria;p__Candidatus_Ryanbacteria;c__unidentified_Candidatus_Ryanbacteria;o__unidentified_Candidatus_Ryanbacteria;f__unidentified_Candidatus_Ryanbacteria;g__unidentified_Candidatus_Ryanbacteria;
Geminicoccus	0	0	0	0	0	0	0	0	0	0	0	0	0	0	0	0	0	0	0	0	k__Bacteria;p__Proteobacteria;c__Alphaproteobacteria;o__Tistrellales;f__Geminicoccaceae;g__Geminicoccus;
Candidatus_Latescibacter	0	0	0	0	0	3.81694e-05	0	0	0	0	0	0	0	0	0	0	0	0	0	0	k__Bacteria;p__Latescibacteria;c__unidentified_Latescibacteria;o__Latescibacterales;f__Latescibacteraceae;g__Candidatus_Latescibacter;
Sneathiella	0	0	0	0	0	0	0	0	0	0	0	0	0	0	0	0	0	0	0	0	k__Bacteria;p__Proteobacteria;c__Alphaproteobacteria;o__Sneathiellales;f__Sneathiellaceae;g__Sneathiella;
wb1-P19	0	0	0	0	0	0	0	0	0	0	0	0	0	0	0	0	0	0	0	0	k__Bacteria;p__Proteobacteria;c__Gammaproteobacteria;o__Nitrosococcales;f__Nitrosococcaceae;g__wb1-P19;
Burkholderia-Caballeronia-Paraburkholderia	0	0	0	0	0	0	0	0	0	0	0	0	0	0	0	0	0	0	0	0	k__Bacteria;p__Proteobacteria;c__Gammaproteobacteria;o__Burkholderiales;f__Burkholderiaceae;g__Burkholderia-Caballeronia-Paraburkholderia;
CENA518	0	0	0	0	0	0	0	0	0	0	0	0	0	0	0	0	0	0	0	0	k__Bacteria;p__Cyanobacteria;c__Cyanobacteriia;o__unidentified_Cyanobacteriia;f__unidentified_Cyanobacteriia;g__CENA518;
unidentified_Sandaracinaceae	0	0	0	0	0	0	0	0	0	0	0	0	0	0	0	0	0	0	0	0	k__Bacteria;p__unidentified_Bacteria;c__Polyangia;o__Polyangiales;f__Sandaracinaceae;g__unidentified_Sandaracinaceae;
Bibersteinia	0	0	0	0	0	0	0	0	0	0	0	0	0	0	0	0	0	0	3.81694e-05	0	k__Bacteria;p__Proteobacteria;c__Gammaproteobacteria;o__Pasteurellales;f__Pasteurellaceae;g__Bibersteinia;
Sporichthya	0	0	0	0	0	0	0	0	0	0	0	0	0	0	0	0	0	0	0	0	k__Bacteria;p__Actinobacteriota;c__Actinobacteria;o__Frankiales;f__Sporichthyaceae;g__Sporichthya;
Geitlerinema	0	0	0	0	0	0	0	0	0	0	0	0	0	0	0	0	0	0	0	0	k__Bacteria;p__Cyanobacteria;c__Cyanobacteriia;o__Geitlerinematales;f__Geitlerinemataceae;g__Geitlerinema;
Marinibaculum	0	0	0	0	0	0	0	0	0	0	0	0	0	0	0	0	0	0	0	0	k__Bacteria;p__Proteobacteria;c__Alphaproteobacteria;o__Ferrovibrionales;f__unidentified_Ferrovibrionales;g__Marinibaculum;
Pedosphaera	0	0	0	0	0	0	0	0	0	0	0	0	0	0	0	0	0	0	0	0	k__Bacteria;p__Verrucomicrobiota;c__Verrucomicrobiae;o__Pedosphaerales;f__Pedosphaeraceae;g__Pedosphaera;
unidentified_mle1-27	0	0	0	0	0	0	0	0	0	0	0	0	0	0	0	0	0	0	0	0	k__Bacteria;p__Myxococcota;c__Polyangia;o__mle1-27;f__unidentified_mle1-27;g__unidentified_mle1-27;
Anaerococcus	0	0	0	0	0	0	0	0	0	0	0	0	0	0	0	0	0	0	0	0	k__Bacteria;p__Firmicutes;c__Clostridia;o__Peptostreptococcales-Tissierellales;f__unidentified_Peptostreptococcales-Tissierellales;g__Anaerococcus;
Paraprevotella	0	0	0	0	0	0	0	0	0	0	0	0	0	0	0	0	0	0	0	0	k__Bacteria;p__Bacteroidota;c__Bacteroidia;o__Bacteroidales;f__Prevotellaceae;g__Paraprevotella;
SM23-31	0	0	0	0	0	0	0	0	0	0	0	0	0	0	0	0	0	0	0	3.81694e-05	k__Bacteria;p__Calditrichota;c__Calditrichia;o__Calditrichales;f__Calditrichaceae;g__SM23-31;
Alysiella	0	0	0	0	0	0	0	0	0	0	0	0	0	0	0	0	0	0	0	0	k__Bacteria;p__Proteobacteria;c__Gammaproteobacteria;o__Burkholderiales;f__Neisseriaceae;g__Alysiella;
Bacteriovorax	0	0	0	0	0	0	0	0	0	0	0	0	3.81694e-05	0	0	0	0	0	0	0	k__Bacteria;p__Bdellovibrionota;c__Bdellovibrionia;o__Bacteriovoracales;f__Bacteriovoracaceae;g__Bacteriovorax;
Lentimonas	0	0	0	0	0	0	0	0	0	0	0	0	3.81694e-05	0	0	0	0	0	0	0	k__Bacteria;p__Verrucomicrobiota;c__Verrucomicrobiae;o__Opitutales;f__Puniceicoccaceae;g__Lentimonas;
Oxobacter	0	0	0	0	0	0	0	0	0	0	0	0	0	0	0	0	0	0	0	0	k__Bacteria;p__Firmicutes;c__Clostridia;o__Clostridiales;f__Oxobacteraceae;g__Oxobacter;
Terriglobus	0	0	0	0	0	0	0	0	0	0	0	3.81694e-05	0	0	0	0	0	0	0	0	k__Bacteria;p__Acidobacteriota;c__Acidobacteriae;o__Acidobacteriales;f__Acidobacteriaceae_(Subgroup_1);g__Terriglobus;
Rosenbergiella	0	0	0	0	0	0	0	0	0	0	0	0	0	0	0	0	0	0	0	0	k__Bacteria;p__Proteobacteria;c__Gammaproteobacteria;o__Enterobacterales;f__Erwiniaceae;g__Rosenbergiella;
Hahella	0	0	0	0	0	0	0	0	0	0	0	0	3.81694e-05	0	0	0	0	0	0	0	k__Bacteria;p__Proteobacteria;c__Gammaproteobacteria;o__Oceanospirillales;f__Hahellaceae;g__Hahella;
Anaerofilum	0	0	0	0	0	0	0	0	0	0	0	0	0	0	0	0	0	0	0	0	k__Bacteria;p__Firmicutes;c__Clostridia;o__Oscillospirales;f__Ruminococcaceae;g__Anaerofilum;
Coprobacter	0	0	0	0	0	0	0	0	0	0	0	0	0	0	0	0	3.81694e-05	0	0	0	k__Bacteria;p__Bacteroidota;c__Bacteroidia;o__Bacteroidales;f__Barnesiellaceae;g__Coprobacter;
Subgroup_23	0	0	0	0	0	0	0	0	0	0	0	0	0	0	0	0	0	0	0	0	k__Bacteria;p__Acidobacteriota;c__Thermoanaerobaculia;o__Thermoanaerobaculales;f__Thermoanaerobaculaceae;g__Subgroup_23;
Rhodomicrobium	0	0	0	0	0	0	0	0	0	0	0	0	0	0	0	0	0	0	0	0	k__Bacteria;p__Proteobacteria;c__Alphaproteobacteria;o__Rhizobiales;f__Rhodomicrobiaceae;g__Rhodomicrobium;
Pseudovibrio	0	0	0	0	0	0	0	0	0	0	0	0	0	0	0	0	0	0	0	0	k__Bacteria;p__Proteobacteria;c__Alphaproteobacteria;o__Rhizobiales;f__Stappiaceae;g__Pseudovibrio;
Eggerthia	0	0	0	0	0	0	0	0	0	0	0	0	0	0	0	0	0	0	0	0	k__Bacteria;p__Firmicutes;c__Bacilli;o__Erysipelotrichales;f__Erysipelatoclostridiaceae;g__Eggerthia;
Methanimicrococcus	0	0	0	0	0	0	0	0	0	0	0	0	0	0	0	0	0	0	0	0	k__Archaea;p__Halobacterota;c__Methanosarcinia;o__Methanosarciniales;f__Methanosarcinaceae;g__Methanimicrococcus;
Marinicella	0	0	0	0	0	0	0	0	0	0	0	0	0	0	0	0	0	0	0	0	k__Bacteria;p__Proteobacteria;c__Gammaproteobacteria;o__unidentified_Gammaproteobacteria;f__unidentified_Gammaproteobacteria;g__Marinicella;
Oligoflexus	0	0	0	0	0	0	0	0	0	0	0	0	0	0	0	0	0	0	0	0	k__Bacteria;p__Bdellovibrionota;c__Oligoflexia;o__Oligoflexales;f__unidentified_Oligoflexales;g__Oligoflexus;
Algoriphagus	0	0	0	0	0	0	0	0	0	0	0	0	3.81694e-05	0	0	0	0	0	0	0	k__Bacteria;p__Bacteroidota;c__Bacteroidia;o__Cytophagales;f__Cyclobacteriaceae;g__Algoriphagus;
Saccharomonospora	0	0	0	0	0	0	0	0	0	0	0	0	0	0	0	0	0	0	0	0	k__Bacteria;p__Actinobacteriota;c__Actinobacteria;o__Pseudonocardiales;f__Pseudonocardiaceae;g__Saccharomonospora;
Methyloparacoccus	0	0	0	0	0	0	0	0	0	0	0	0	0	0	0	0	0	0	0	0	k__Bacteria;p__Proteobacteria;c__Gammaproteobacteria;o__Methylococcales;f__Methylococcaceae;g__Methyloparacoccus;
Leptolyngbya_ANT.L52.2	0	0	0	0	0	0	0	0	0	0	0	0	0	0	0	0	0	0	0	0	k__Bacteria;p__Cyanobacteria;c__Cyanobacteriia;o__unidentified_Cyanobacteriia;f__unidentified_Cyanobacteriia;g__Leptolyngbya_ANT.L52.2;
Thermobacillus	0	0	0	0	0	0	0	0	0	0	0	0	0	0	0	0	0	0	0	0	k__Bacteria;p__Firmicutes;c__Bacilli;o__Paenibacillales;f__Paenibacillaceae;g__Thermobacillus;
Desulfuromonas	0	0	0	0	0	0	0	0	0	0	0	0	0	0	0	0	0	0	0	0	k__Bacteria;p__Desulfobacterota;c__Desulfuromonadia;o__unidentified_Desulfuromonadia;f__Desulfuromonadaceae;g__Desulfuromonas;
Peptoniphilus	0	0	0	0	0	0	0	0	0	0	0	0	0	0	0	0	0	0	0	0	k__Bacteria;p__Firmicutes;c__Clostridia;o__Peptostreptococcales-Tissierellales;f__unidentified_Peptostreptococcales-Tissierellales;g__Peptoniphilus;
Stella	0	0	0	0	0	0	0	0	0	0	0	0	0	0	0	0	0	0	0	3.81694e-05	k__Bacteria;p__Proteobacteria;c__Alphaproteobacteria;o__Azospirillales;f__unidentified_Azospirillales;g__Stella;
Arthrobacter	0	0	0	0	0	0	0	0	0	0	0	0	0	0	0	0	0	0	0	0	k__Bacteria;p__Actinobacteriota;c__Actinobacteria;o__Micrococcales;f__Micrococcaceae;g__Arthrobacter;
Rahnella1	0	0	0	0	0	0	0	0	0	0	0	0	0	0	0	0	0	0	0	0	k__Bacteria;p__Proteobacteria;c__Gammaproteobacteria;o__Enterobacterales;f__Yersiniaceae;g__Rahnella1;
Ercella	0	0	0	0	0	3.81694e-05	0	0	0	0	0	0	3.81694e-05	0	0	0	0	0	0	0	k__Bacteria;p__Firmicutes;c__Clostridia;o__unidentified_Clostridia;f__Hungateiclostridiaceae;g__Ercella;
Dehalobium	0	0	0	0	0	0	0	0	0	0	0	0	0	0	0	0	0	0	0	0	k__Bacteria;p__Chloroflexi;c__Dehalococcoidia;o__Dehalococcoidales;f__unidentified_Dehalococcoidales;g__Dehalobium;
PMMR1	0	0	0	0	0	0	0	0	0	0	0	3.81694e-05	0	0	0	0	0	0	0	0	k__Bacteria;p__Proteobacteria;c__Alphaproteobacteria;o__Caulobacterales;f__Caulobacteraceae;g__PMMR1;
Reichenbachiella	0	0	0	0	0	0	0	0	0	0	0	0	0	0	0	0	0	0	0	0	k__Bacteria;p__Bacteroidota;c__Bacteroidia;o__Cytophagales;f__Cyclobacteriaceae;g__Reichenbachiella;
Anaerostignum	0	0	0	0	0	0	0	0	0	0	0	0	0	0	0	0	3.81694e-05	0	0	0	k__Bacteria;p__Firmicutes;c__Clostridia;o__Lachnospirales;f__Lachnospiraceae;g__Anaerostignum;
Alterococcus	0	0	0	0	0	0	0	0	0	0	0	0	3.81694e-05	0	0	0	0	0	0	0	k__Bacteria;p__Verrucomicrobiota;c__Verrucomicrobiae;o__Opitutales;f__Opitutaceae;g__Alterococcus;
pItb-vmat-59	0	0	0	0	0	0	0	0	0	0	0	0	0	0	0	0	0	0	0	3.81694e-05	k__Bacteria;p__Proteobacteria;c__Gammaproteobacteria;o__Methylococcales;f__Methylomonadaceae;g__pItb-vmat-59;
Syntrophomonas	0	0	0	0	0	0	0	0	0	0	0	0	0	0	0	0	0	0	0	0	k__Bacteria;p__Firmicutes;c__Syntrophomonadia;o__Syntrophomonadales;f__Syntrophomonadaceae;g__Syntrophomonas;
Acidicaldus	0	0	0	0	0	0	0	0	0	0	0	0	0	0	0	0	0	0	0	0	k__Bacteria;p__Proteobacteria;c__Alphaproteobacteria;o__Acetobacterales;f__Acetobacteraceae;g__Acidicaldus;
Brachyspira	0	0	0	0	0	0	0	0	0	0	0	0	0	0	0	0	0	0	0	0	k__Bacteria;p__Spirochaetota;c__Brachyspirae;o__Brachyspirales;f__Brachyspiraceae;g__Brachyspira;
unidentified_OM190	0	0	0	0	0	0	0	0	0	0	0	0	0	0	0	0	0	0	0	0	k__Bacteria;p__Planctomycetota;c__OM190;o__unidentified_OM190;f__unidentified_OM190;g__unidentified_OM190;
Alkalibacter	0	0	0	0	0	0	0	0	0	0	0	0	0	0	0	0	0	0	0	0	k__Bacteria;p__Firmicutes;c__Clostridia;o__Eubacteriales;f__Alkalibacteraceae;g__Alkalibacter;
Verruc-01	0	0	0	0	0	0	0	0	0	0	0	0	0	0	0	0	0	0	0	0	k__Bacteria;p__Verrucomicrobiota;c__Verrucomicrobiae;o__Opitutales;f__Puniceicoccaceae;g__Verruc-01;
Candidatus_Methylospira	0	0	0	0	0	0	0	0	0	0	0	0	0	0	0	0	0	0	0	0	k__Bacteria;p__Proteobacteria;c__Gammaproteobacteria;o__Methylococcales;f__Methylococcaceae;g__Candidatus_Methylospira;
Peptoanaerobacter	0	0	0	0	0	0	0	0	0	0	0	0	0	0	0	0	0	0	0	0	k__Bacteria;p__Firmicutes;c__Clostridia;o__Peptostreptococcales-Tissierellales;f__Peptostreptococcaceae;g__Peptoanaerobacter;
Leptonema	0	0	0	0	0	0	0	0	0	0	0	0	3.81694e-05	0	0	0	0	0	0	0	k__Bacteria;p__Spirochaetota;c__Leptospirae;o__Leptospirales;f__Leptospiraceae;g__Leptonema;
UCG-012	0	0	0	0	0	0	0	0	0	0	0	0	0	0	0	0	0	0	0	3.81694e-05	k__Bacteria;p__Firmicutes;c__Clostridia;o__unidentified_Clostridia;f__Hungateiclostridiaceae;g__UCG-012;
Anaerosolibacter	0	0	0	0	0	0	0	0	0	0	0	0	0	0	0	0	0	0	0	0	k__Bacteria;p__Firmicutes;c__Clostridia;o__Peptostreptococcales-Tissierellales;f__Thermotaleaceae;g__Anaerosolibacter;
Nevskia	0	0	0	0	0	0	0	0	0	0	0	0	0	0	0	0	0	0	0	0	k__Bacteria;p__Proteobacteria;c__Gammaproteobacteria;o__Salinisphaerales;f__Solimonadaceae;g__Nevskia;
Edaphobacter	0	0	0	0	0	0	0	0	0	0	0	0	0	0	0	0	0	0	0	0	k__Bacteria;p__Acidobacteriota;c__Acidobacteriae;o__Acidobacteriales;f__Acidobacteriaceae_(Subgroup_1);g__Edaphobacter;
Tundrisphaera	0	0	0	0	0	0	0	0	0	0	0	0	0	0	0	0	0	0	0	0	k__Bacteria;p__Planctomycetes;c__unidentified_Planctomycetes;o__Isosphaerales;f__Isosphaeraceae;g__Tundrisphaera;
Vampirovibrio	0	0	0	0	0	0	0	0	0	0	0	0	0	0	0	0	0	0	0	0	k__Bacteria;p__Cyanobacteria;c__Vampirivibrionia;o__Vampirovibrionales;f__Vampirovibrionaceae;g__Vampirovibrio;
Hyphococcus	0	0	0	0	0	0	0	0	0	0	0	0	3.81694e-05	0	0	0	0	0	0	0	k__Bacteria;p__Proteobacteria;c__Alphaproteobacteria;o__Caulobacterales;f__Parvularculaceae;g__Hyphococcus;
Alishewanella	0	0	0	0	0	0	0	0	0	0	0	0	0	0	0	0	0	0	0	0	k__Bacteria;p__Proteobacteria;c__Gammaproteobacteria;o__Alteromonadales;f__Alteromonadaceae;g__Alishewanella;
Candidatus_Spiroplasma	0	0	0	0	0	0	0	0	0	0	0	0	0	0	0	0	0	0	0	0	k__Bacteria;p__Firmicutes;c__Bacilli;o__Entomoplasmatales;f__unidentified_Entomoplasmatales;g__Candidatus_Spiroplasma;
unidentified_bacteriap25	0	0	0	0	0	0	0	0	3.81694e-05	0	0	0	0	0	0	0	0	0	0	0	k__Bacteria;p__Myxococcota;c__bacteriap25;o__unidentified_bacteriap25;f__unidentified_bacteriap25;g__unidentified_bacteriap25;
Petrimonas	0	0	0	0	0	0	0	0	0	0	0	0	0	0	0	0	0	0	0	0	k__Bacteria;p__Bacteroidota;c__Bacteroidia;o__Bacteroidales;f__Dysgonomonadaceae;g__Petrimonas;
LCP-80	0	0	0	0	0	0	0	0	0	0	0	0	0	0	0	0	0	0	0	0	k__Bacteria;p__Desulfobacterota;c__Desulfobacteria;o__Desulfobacterales;f__Desulfosarcinaceae;g__LCP-80;
Asticcacaulis	0	0	0	0	0	0	0	0	0	0	0	3.81694e-05	0	0	0	0	0	0	0	0	k__Bacteria;p__Proteobacteria;c__Alphaproteobacteria;o__Caulobacterales;f__Caulobacteraceae;g__Asticcacaulis;
T2WK15B57	0	0	0	0	0	0	0	0	0	0	0	0	0	0	0	0	0	0	0	0	k__Bacteria;p__Firmicutes;c__Bacilli;o__Acholeplasmatales;f__Acholeplasmataceae;g__T2WK15B57;
GWE2-31-10	0	0	0	0	0	0	0	0	0	0	0	0	0	0	0	0	0	0	0	0	k__Bacteria;p__Spirochaetota;c__Spirochaetia;o__Spirochaetales;f__Spirochaetaceae;g__GWE2-31-10;
Ornatilinea	0	0	0	0	0	0	0	0	0	0	0	0	3.81694e-05	0	0	0	0	0	0	0	k__Bacteria;p__Chloroflexi;c__Anaerolineae;o__Anaerolineales;f__Anaerolineaceae;g__Ornatilinea;
unidentified_Latescibacteraceae	0	0	0	0	0	0	0	0	0	0	0	0	0	0	0	0	0	0	0	0	k__Bacteria;p__Latescibacteria;c__unidentified_Latescibacteria;o__Latescibacterales;f__Latescibacteraceae;g__unidentified_Latescibacteraceae;
Moheibacter	0	0	0	0	0	0	0	0	0	0	0	0	0	0	0	0	0	0	0	0	k__Bacteria;p__Bacteroidota;c__Bacteroidia;o__Flavobacteriales;f__Weeksellaceae;g__Moheibacter;
RumEn_M2	0	0	0	0	0	0	0	0	0	0	0	0	0	0	0	0	0	0	0	0	k__Archaea;p__Thermoplasmatota;c__Thermoplasmata;o__Methanomassiliicoccales;f__Methanomethylophilaceae;g__RumEn_M2;
Quinella	0	0	0	0	0	0	0	0	0	0	0	0	0	0	0	0	0	0	0	0	k__Bacteria;p__Firmicutes;c__Negativicutes;o__Veillonellales-Selenomonadales;f__Selenomonadaceae;g__Quinella;
Keratinibaculum	0	0	0	0	0	0	0	0	0	0	0	0	0	0	0	0	0	0	0	0	k__Bacteria;p__Firmicutes;c__Clostridia;o__Peptostreptococcales-Tissierellales;f__unidentified_Peptostreptococcales-Tissierellales;g__Keratinibaculum;
unidentified_WPS-2	0	0	0	0	0	0	0	0	0	0	0	0	0	0	0	0	0	0	0	0	k__Bacteria;p__WPS-2;c__unidentified_WPS-2;o__unidentified_WPS-2;f__unidentified_WPS-2;g__unidentified_WPS-2;
Propionivibrio	0	0	0	0	0	0	0	0	0	0	0	0	0	0	0	0	0	0	0	0	k__Bacteria;p__Proteobacteria;c__Gammaproteobacteria;o__Burkholderiales;f__Rhodocyclaceae;g__Propionivibrio;
Anseongella	0	0	0	0	0	0	0	0	0	0	0	0	0	0	0	0	0	0	0	0	k__Bacteria;p__Bacteroidota;c__Bacteroidia;o__Sphingobacteriales;f__Sphingobacteriaceae;g__Anseongella;
Vicinamibacter	0	0	0	0	0	0	0	0	0	0	0	0	0	0	0	0	0	0	0	0	k__Bacteria;p__Acidobacteriota;c__Vicinamibacteria;o__Vicinamibacterales;f__Vicinamibacteraceae;g__Vicinamibacter;
Synergistes	0	0	0	0	0	0	0	0	0	0	0	0	0	0	0	0	0	0	0	0	k__Bacteria;p__Synergistota;c__Synergistia;o__Synergistales;f__Synergistaceae;g__Synergistes;
SH3-11	0	0	0	0	0	0	0	0	0	0	0	0	0	0	0	0	0	0	0	0	k__Bacteria;p__Verrucomicrobiota;c__Verrucomicrobiae;o__Pedosphaerales;f__Pedosphaeraceae;g__SH3-11;
Phocaeicola	0	0	0	0	0	0	0	0	0	0	0	0	0	0	0	0	0	0	0	0	k__Bacteria;p__Bacteroidota;c__Bacteroidia;o__Bacteroidales;f__unidentified_Bacteroidales;g__Phocaeicola;
Erysipelotrichaceae_UCG-009	0	0	0	0	0	0	0	0	0	0	0	0	0	0	0	0	0	0	0	0	k__Bacteria;p__Firmicutes;c__Bacilli;o__Erysipelotrichales;f__Erysipelotrichaceae;g__Erysipelotrichaceae_UCG-009;
Aliikangiella	0	0	0	0	0	0	0	0	0	0	0	0	0	0	0	0	0	0	0	0	k__Bacteria;p__Proteobacteria;c__Gammaproteobacteria;o__Oceanospirillales;f__Kangiellaceae;g__Aliikangiella;
Elusimicrobium	0	0	0	0	0	0	0	0	0	0	0	0	0	0	0	0	0	0	0	0	k__Bacteria;p__Elusimicrobia;c__unidentified_Elusimicrobia;o__Elusimicrobiales;f__Elusimicrobiaceae;g__Elusimicrobium;
Anaerovibrio	0	0	0	0	0	0	0	0	0	0	0	0	0	0	0	0	0	0	0	0	k__Bacteria;p__Firmicutes;c__Negativicutes;o__Veillonellales-Selenomonadales;f__Selenomonadaceae;g__Anaerovibrio;
Thermosipho	0	0	0	0	0	0	0	0	0	0	0	0	0	0	0	0	0	0	0	0	k__Bacteria;p__Thermotogae;c__unidentified_Thermotogae;o__Thermotogales;f__Fervidobacteriaceae;g__Thermosipho;
ZOR0006	0	0	0	0	0	0	0	0	0	0	0	0	0	0	0	0	0	0	0	0	k__Bacteria;p__Firmicutes;c__Bacilli;o__Erysipelotrichales;f__Erysipelotrichaceae;g__ZOR0006;
Others	0.29753	0.347036	0.310126	0.41826	0.231078	0.523913	0.259666	0.0752319	0.0475591	0.107409	0.0237032	0.169434	0.305775	0.206458	0.176724	0.580976	0.312111	0.0407649	0.545593	0.108554	Others
